# Supplementary material for: Diverse Co(II) Coordination Polymers with the Same Mixed Ligands: Evaluation of Chemical Stability and Structural Transformation
Source: MDPI journal article supplement (doi:10.3390/molecules29081748), 2024-04-12

## Supplementary Materials

# Diverse Co(II) Coordination Polymers with Same Mixed Ligands: Evaluation for Chemical Stability and Structural Transformation

Chia-Yi Lee,<sup>1</sup> Yu-Hui Ye,<sup>1</sup> Song-Wei Wang<sup>1</sup> and Jhy-Der Chen<sup>1,\*</sup>

<sup>1</sup> Department of Chemistry, Chung Yuan Christian University, Chung Li, Taoyuan City 320, Taiwan; miss10031031@gmail.com (C.-Y.L.); a4862225@gmail.com (Y.-H. Y.); bvbv20520@gmail.com (S.-W.W.)

\* Correspondence: jdchen@cycu.edu.tw (J.-D.C.);  
Tel.: +886-3-265-3351 (J.-D.C.)

**Figure S1.** The PXRD patterns of complex **1**.

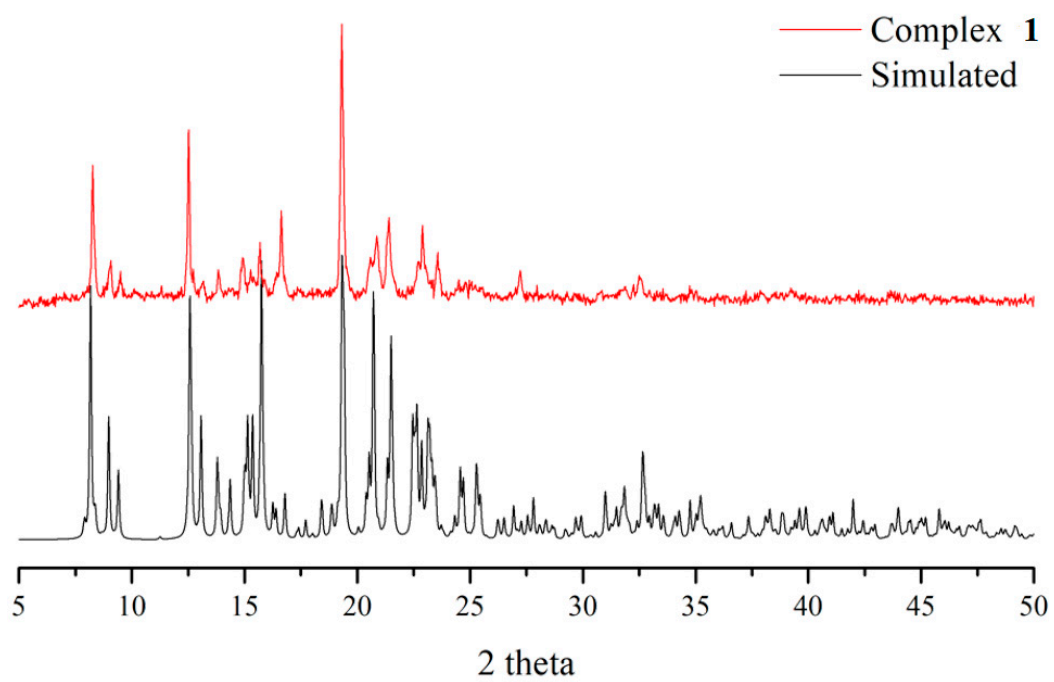

**Figure S2.** The PXRD patterns of complex **2**.

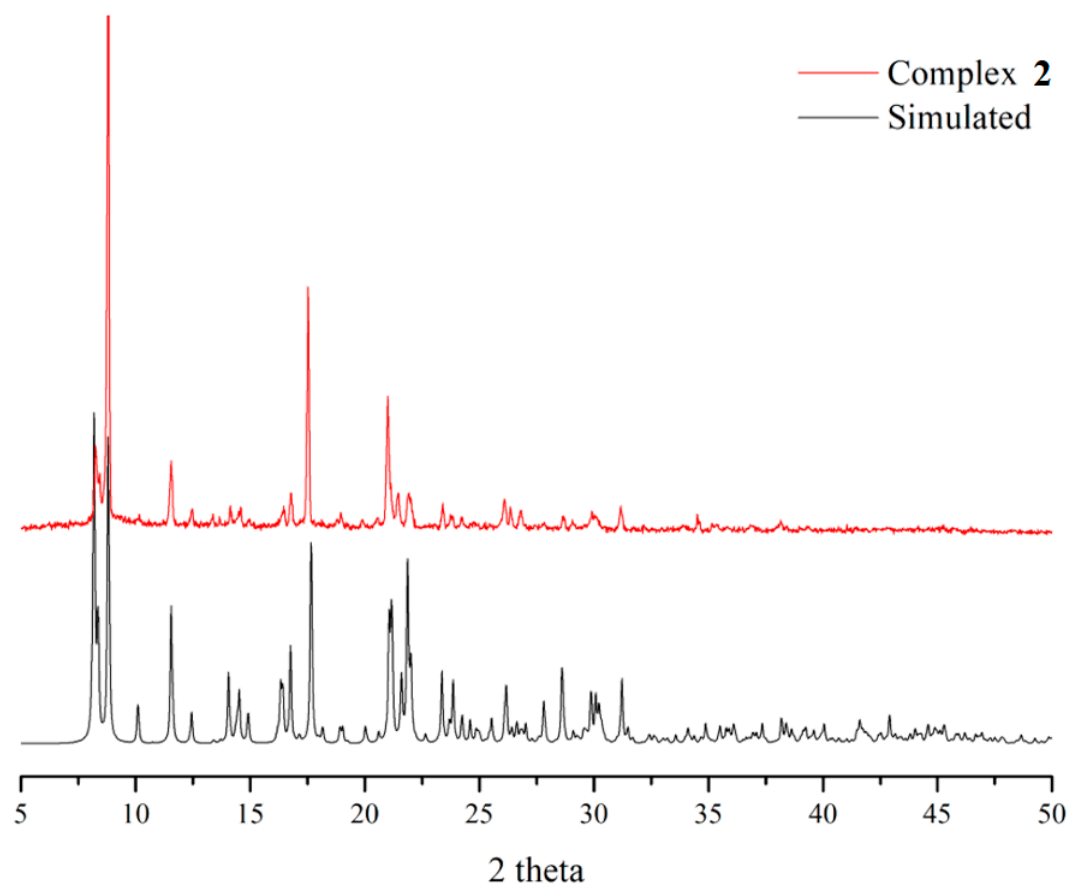

**Figure S3.** The PXRD patterns of complex **3**.

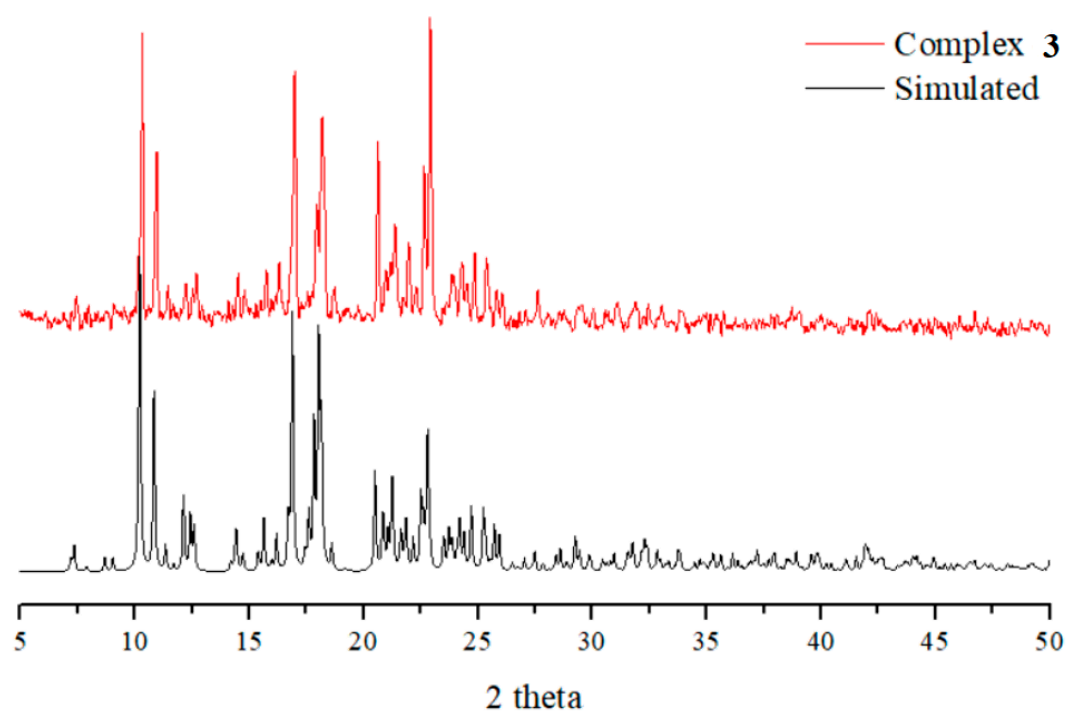

**Figure S4.** The PXRD patterns of complex **4**.

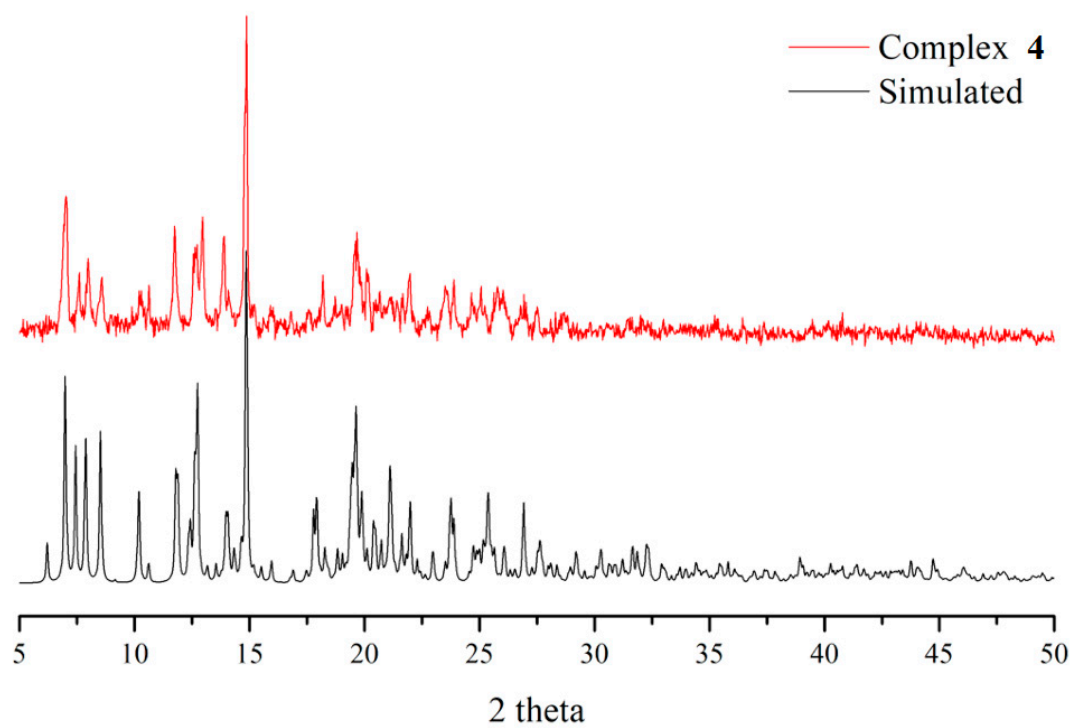

**Figure S5.** TGA curve of complex **1**.

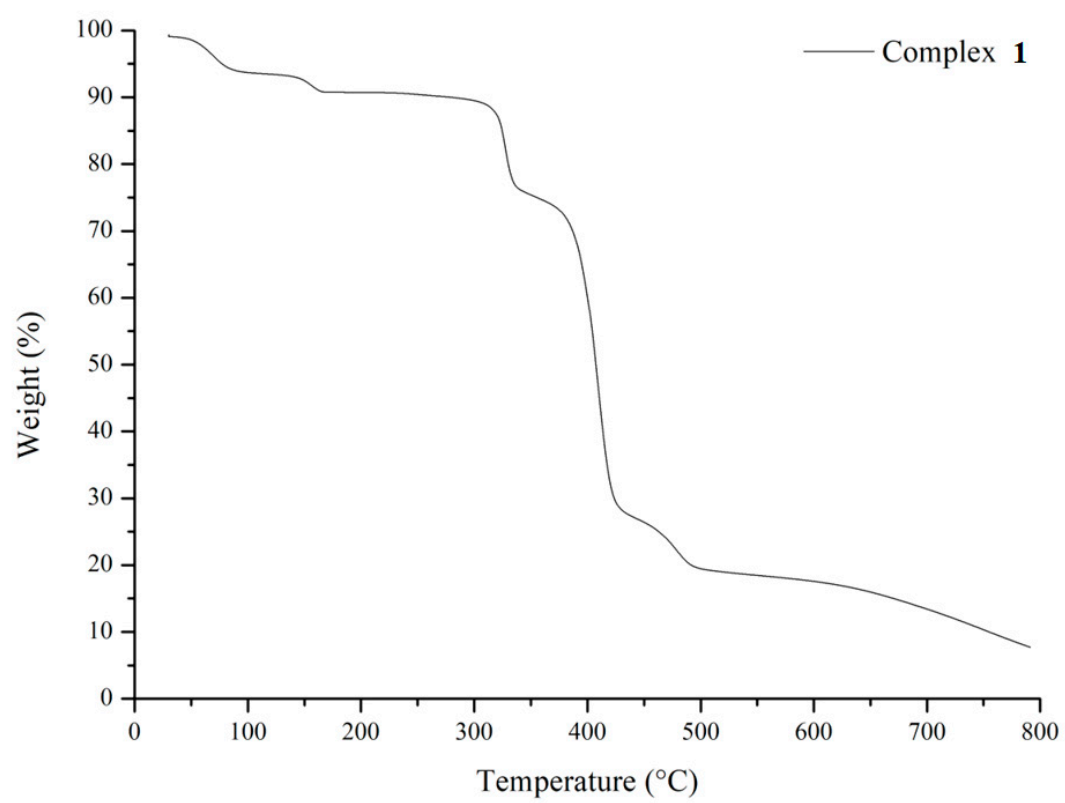

**Figure S6.** TGA curve of complex **2**.

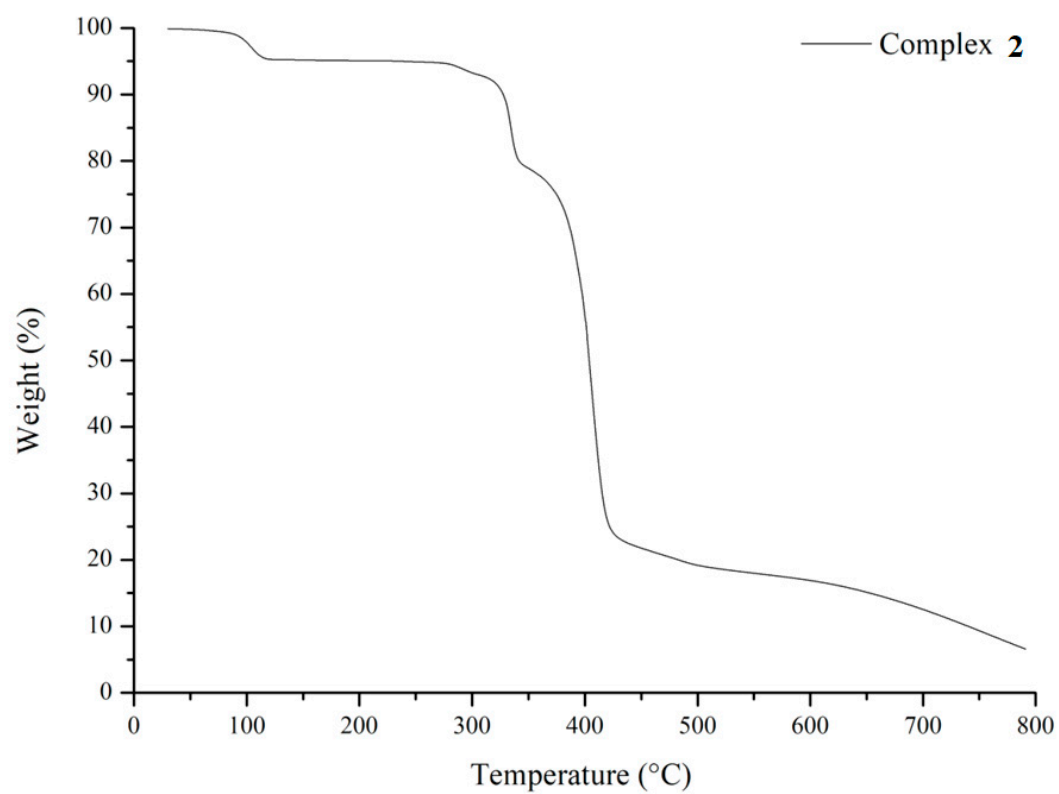

**Figure S7.** TGA curve of complex **3**.

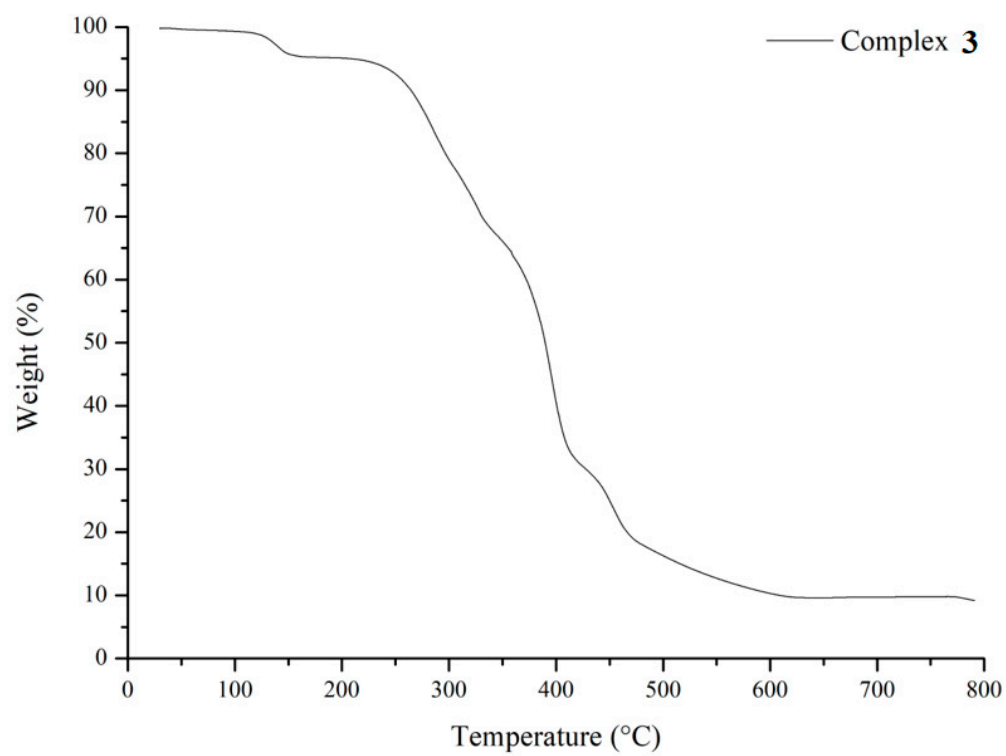



**Figure S8.** TGA curve of complex **4**.

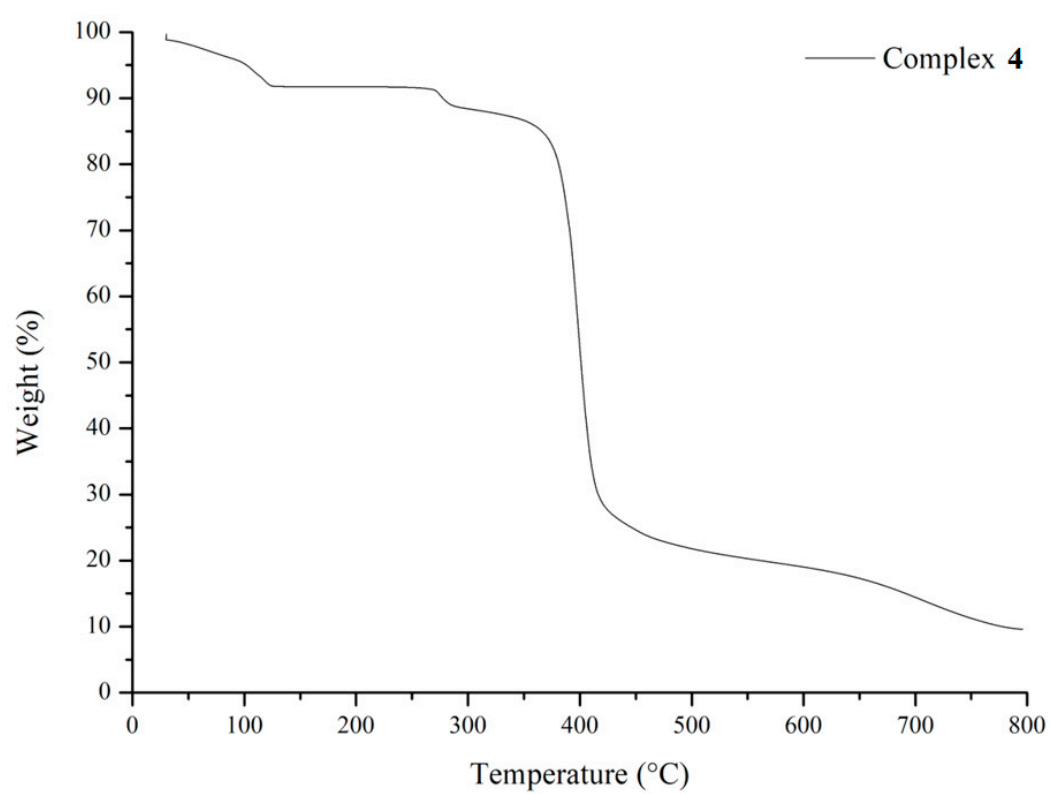

**Figure S9.** PXRD patterns of complex **1** immersed in a variety of organic solvents.

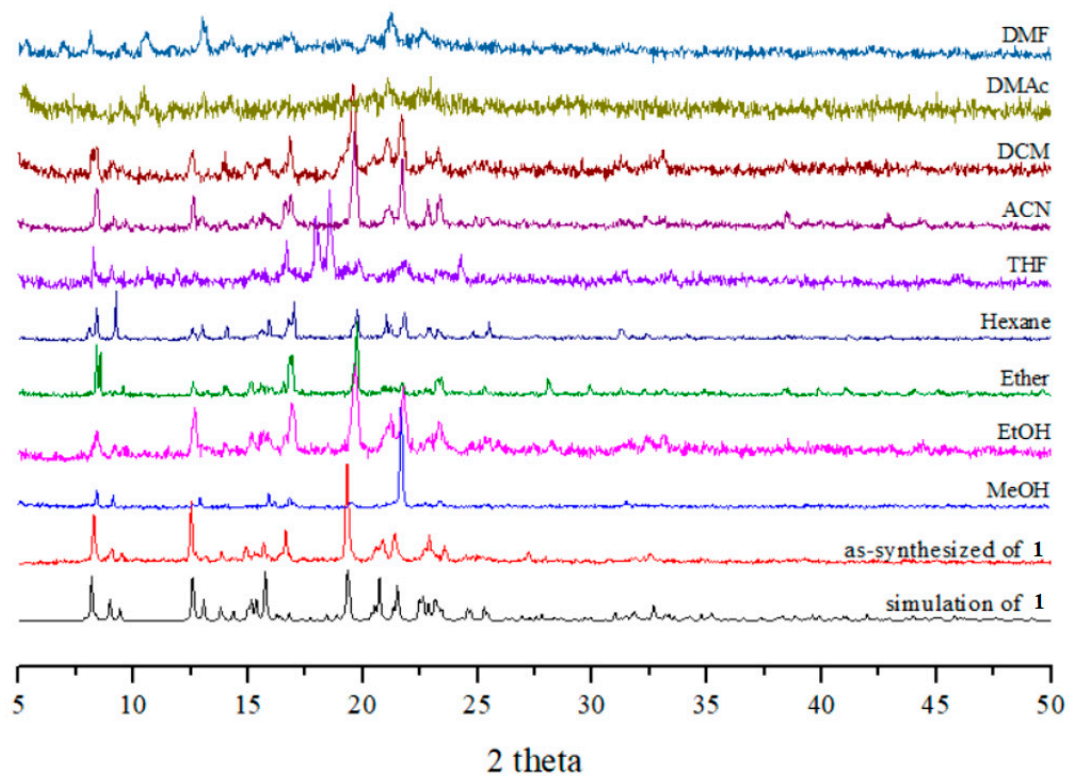

**Figure S10.** PXRD patterns of complex **2** immersed in a variety of organic solvents.

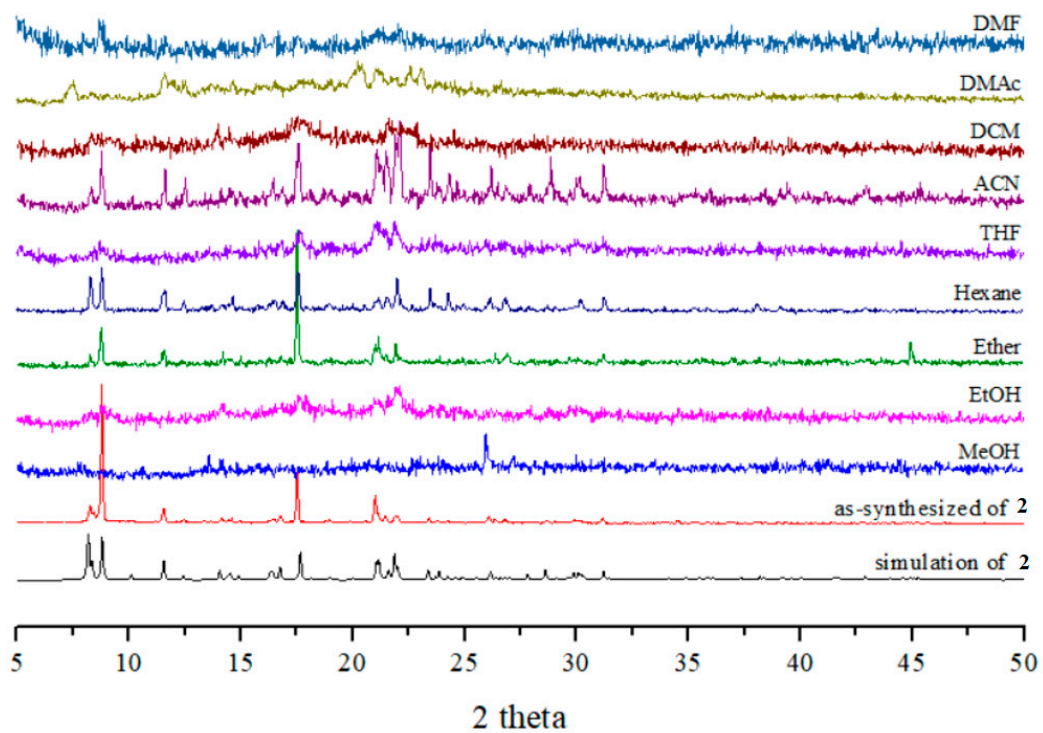

**Figure S11.** PXRD patterns of complex **3** immersed in a variety of organic solvents.

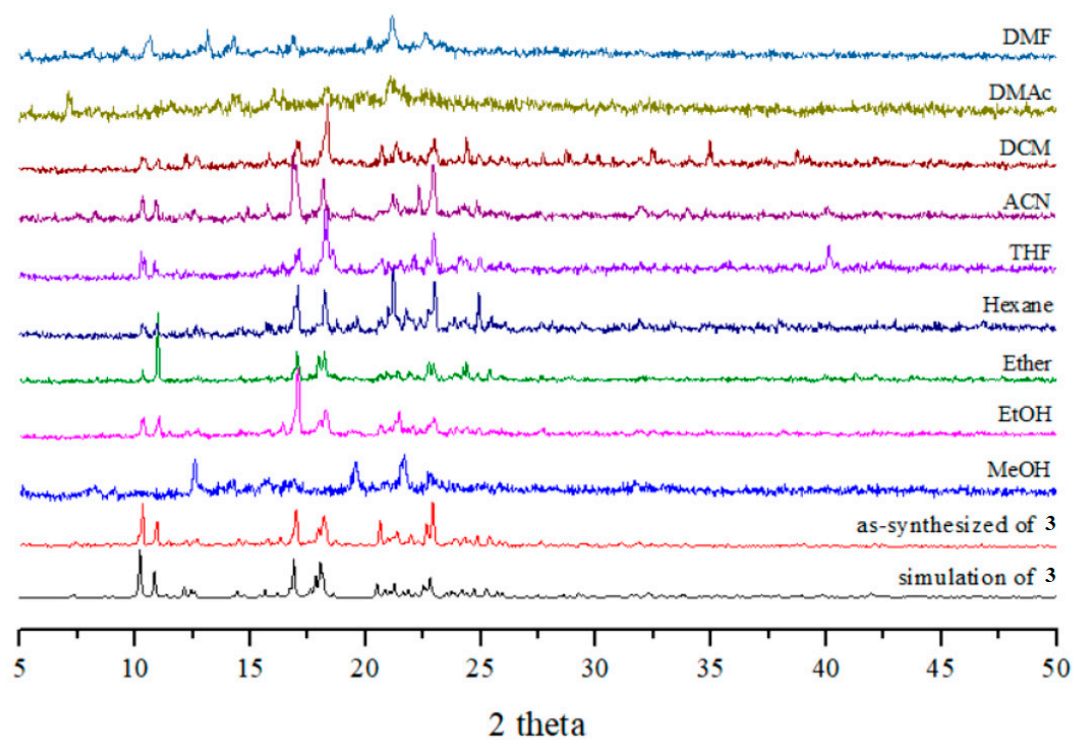

**Figure S12.** PXRD patterns of complex **4** immersed in a variety of organic solvents.

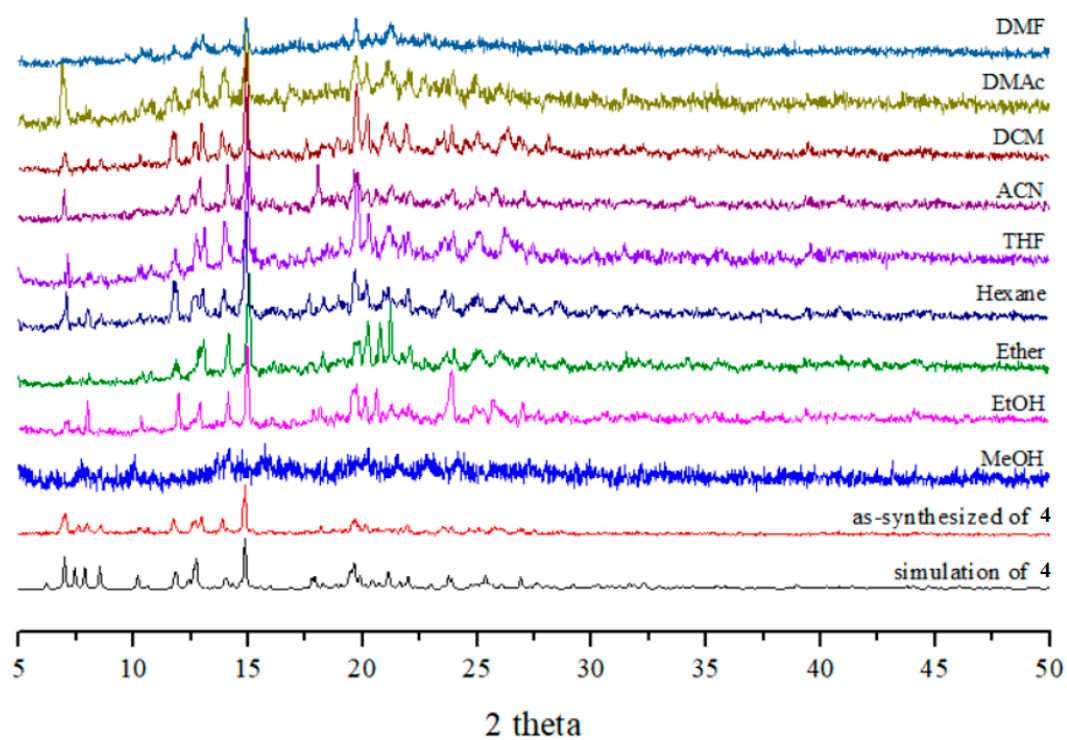

**Figure S13.** Photos of complexes **1** – **4** before and after heating.

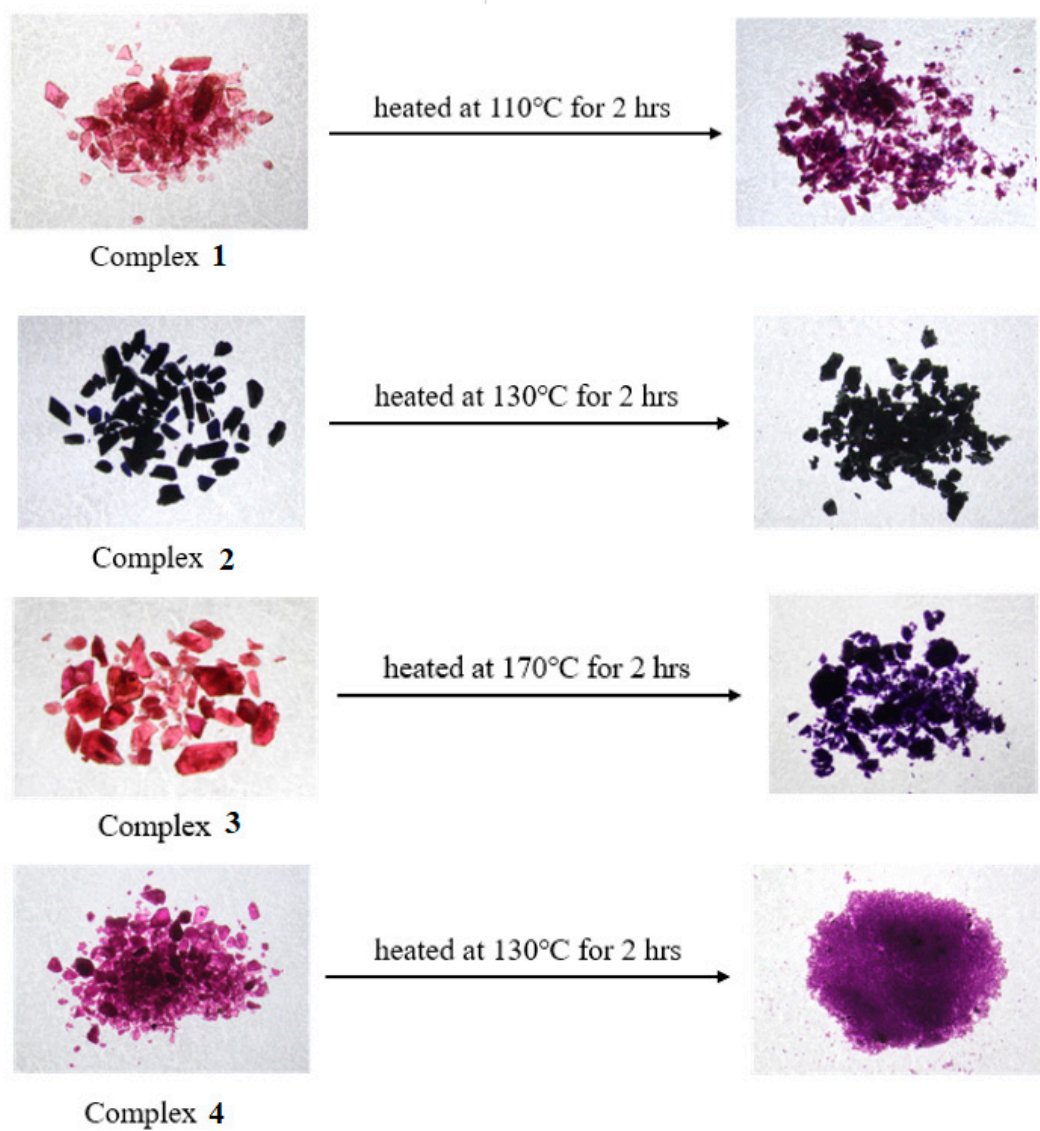

**Figure S14.** PXRD patterns of complex **1** heated at 110 °C for 2 hours and then immersed in a variety of organic solvents.

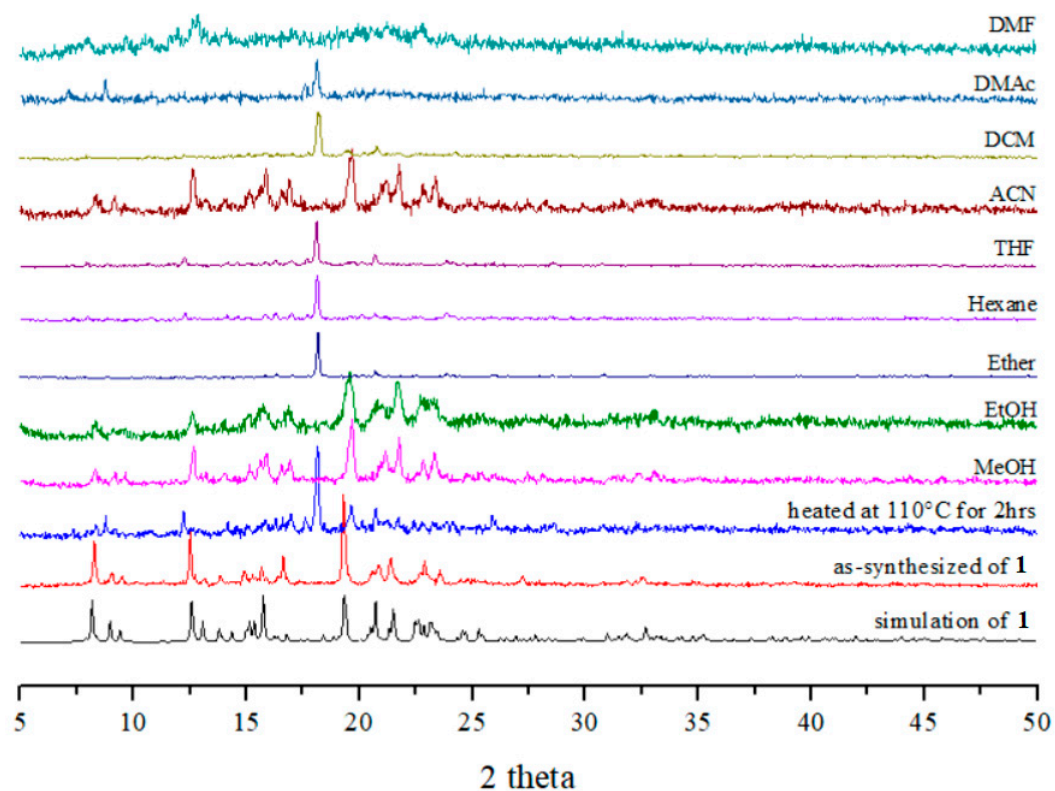



**Figure S15.** PXRD patterns of complex **2** heated at 130 °C for 2 hours and then immersed in a variety of organic solvents.

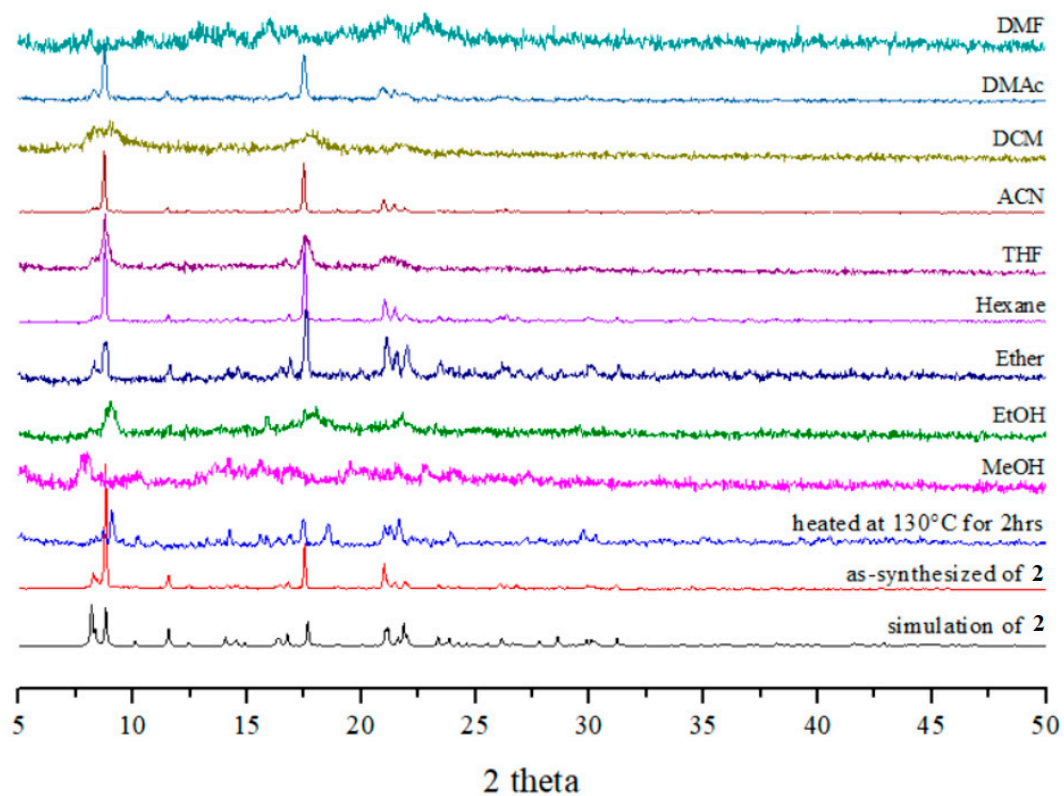



**Figure S16.** PXRD patterns of complex **3** heated at 170 °C for 2 hours and then immersed in a variety of organic solvents.

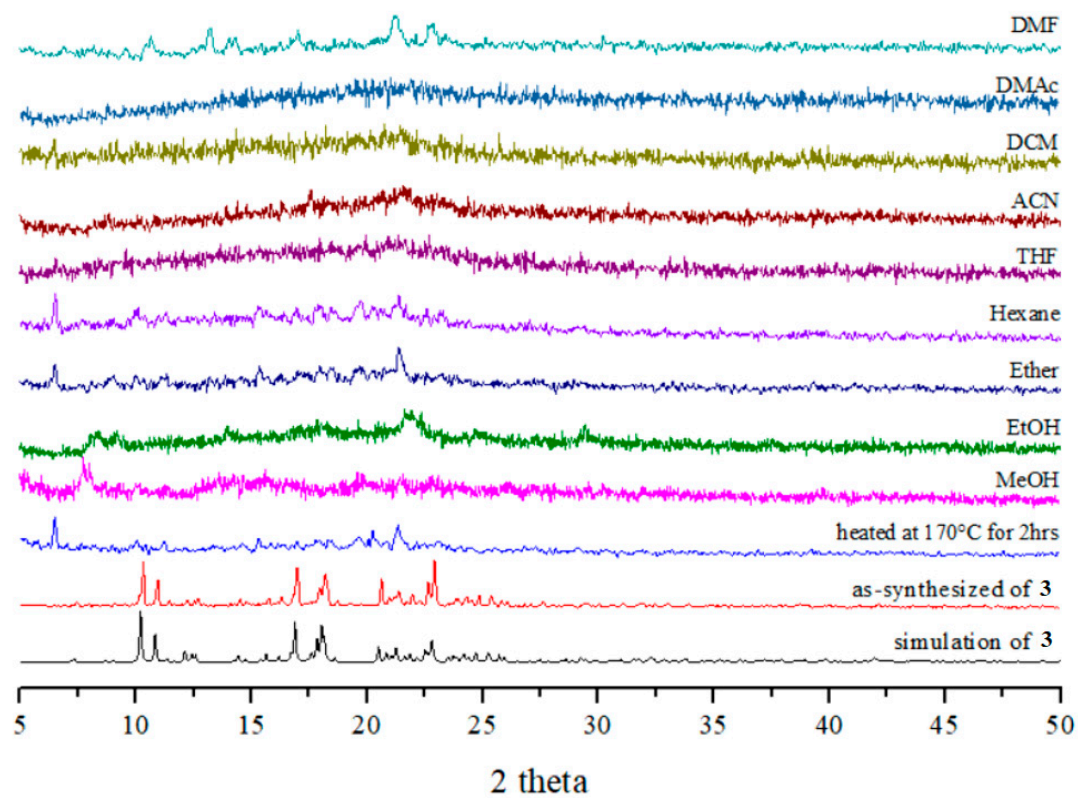

**Figure S17.** PXRD patterns of complex **4** heated at 130 °C for 2 hours and then immersed in a variety of organic solvents.

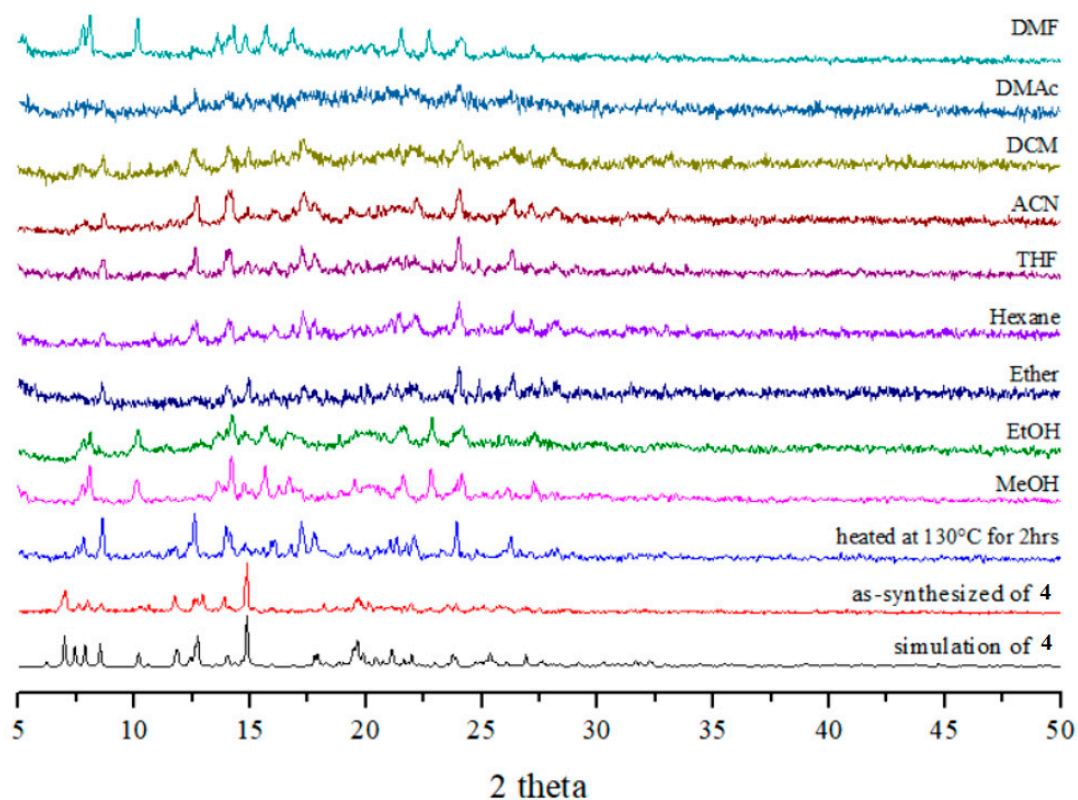

**Figure S18.** IR spectra for the structural transformations of **1** to **4** in water.

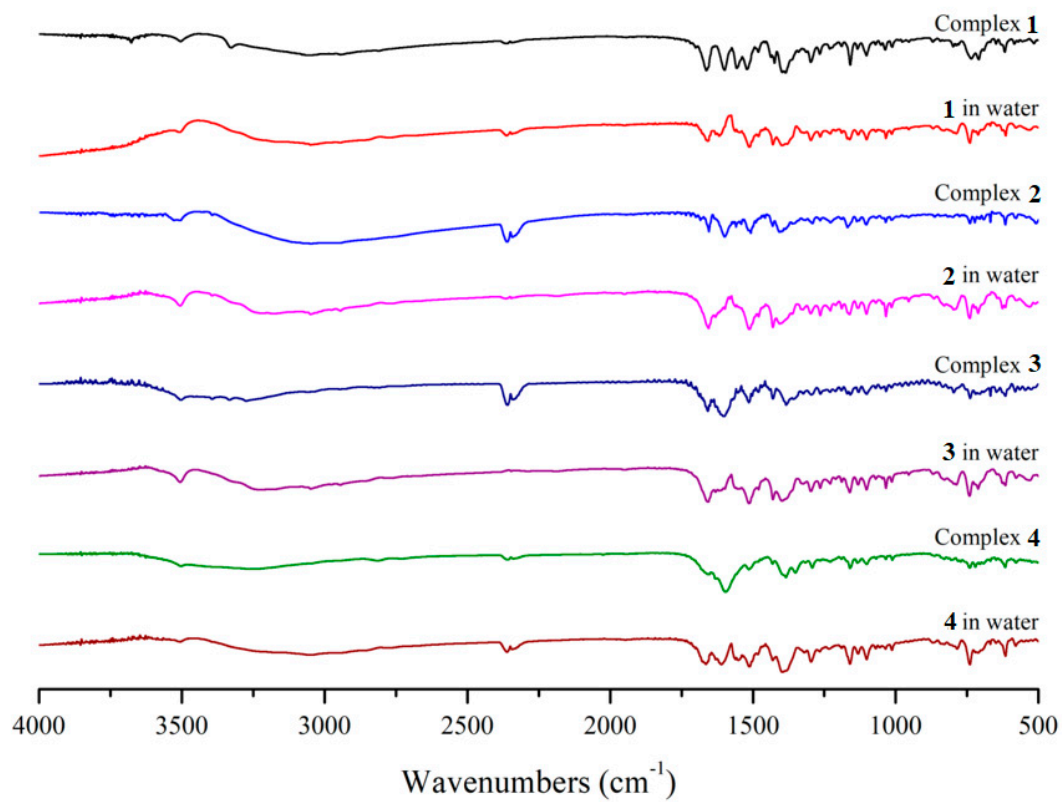

**Figure S19.** Infrared spectrum of complex **1**.

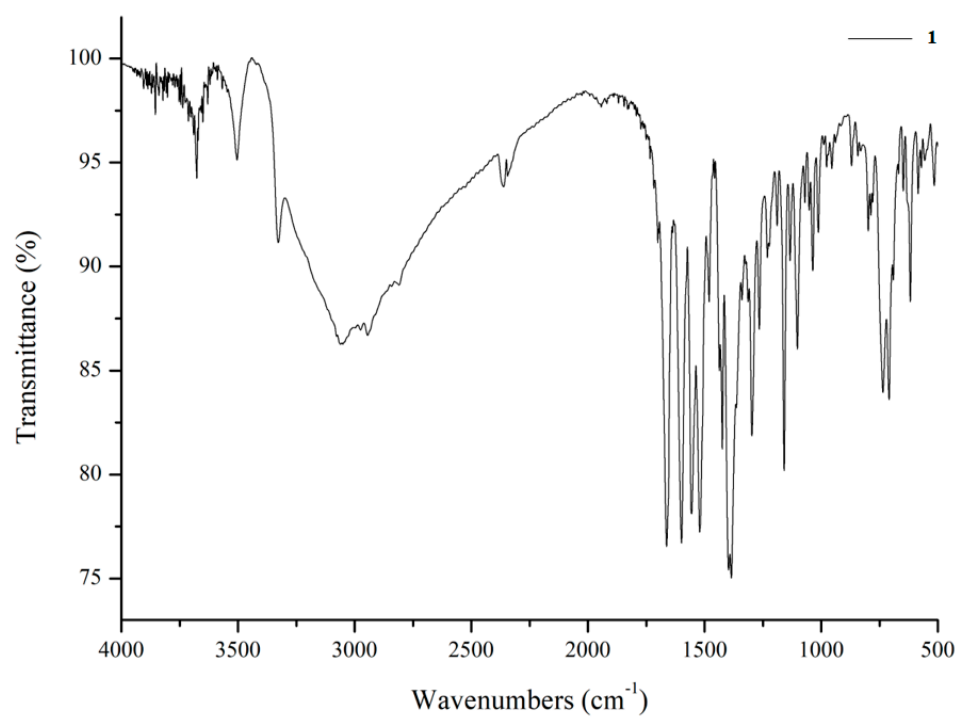

**Figure S20.** Infrared spectrum of complex **2**.

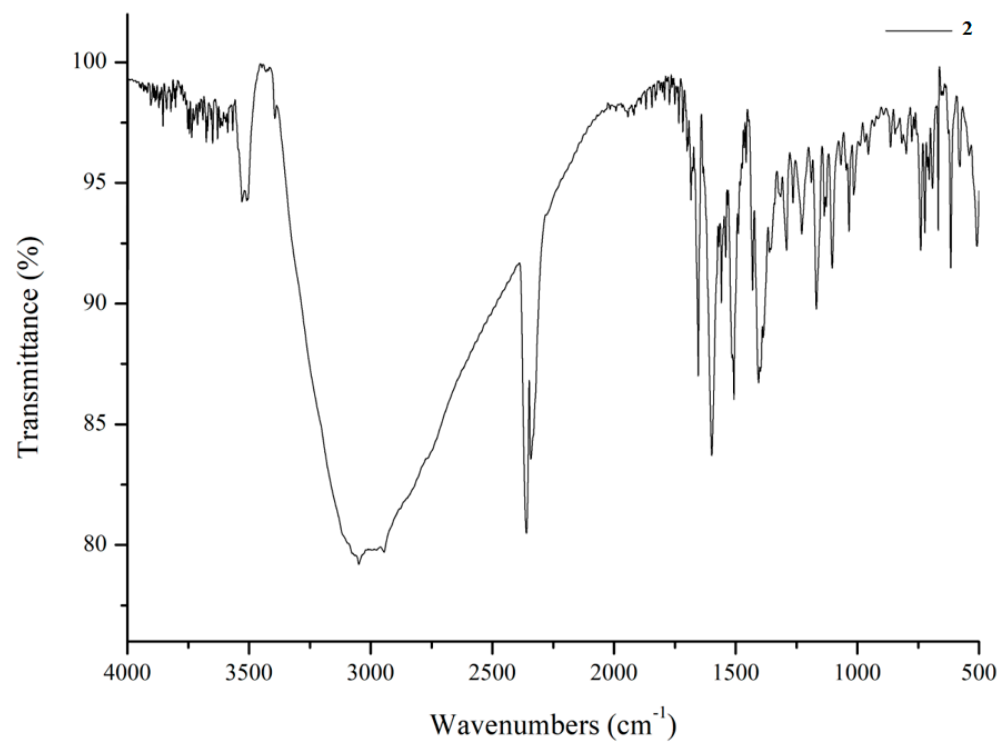

**Figure S21.** Infrared spectrum of complex **3**.

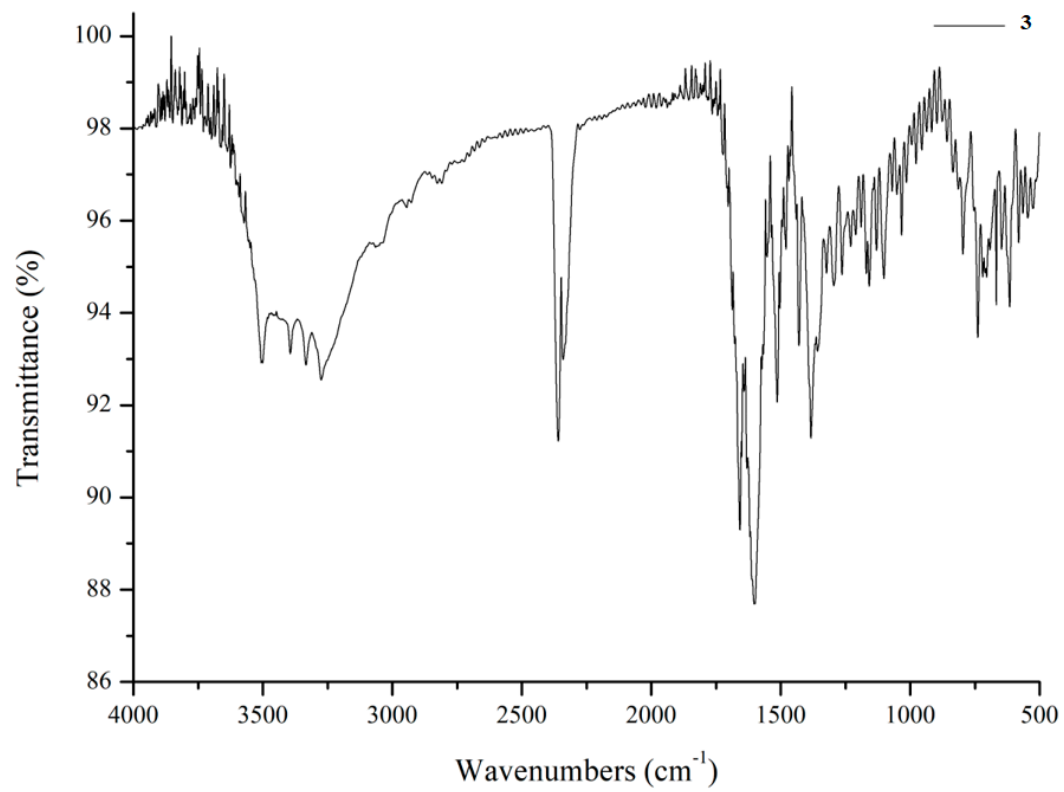

**Figure S22.** Infrared spectrum of complex **4**.

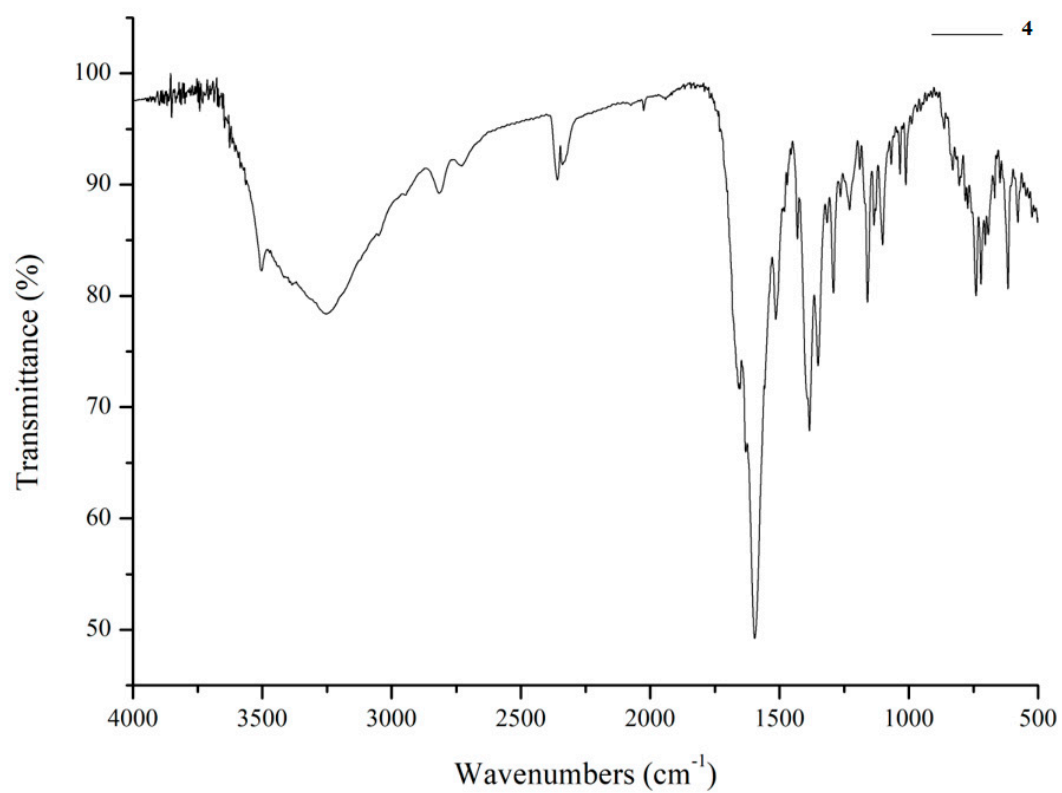

Supplement: s1 [file s1]
