# Supplementary material for: Diverse Co(II) Coordination Polymers with the Same Mixed Ligands: Evaluation of Chemical Stability and Structural Transformation
Source: Molecules. 2024 Apr 12;29(8):1748. doi: 10.3390/molecules29081748 (PMC11051802; doi:10.3390/molecules29081748)
Supplement: Supplementary file 1 [file molecules-29-01748-s001.zip › allcif.cif]

 
data_1 
  
_audit_creation_method            'SHELXL-2017/1' 
_shelx_SHELXL_version_number      '2017/1' 
_chemical_name_systematic         ? 
_chemical_name_common             ? 
_chemical_melting_point           ? 
_chemical_formula_moiety          ? 
_chemical_formula_sum 
 'C29 H32 Co N4 O12 S' 
_chemical_formula_weight          719.57 
  
loop_ 
 _atom_type_symbol 
 _atom_type_description 
 _atom_type_scat_dispersion_real 
 _atom_type_scat_dispersion_imag 
 _atom_type_scat_source 
 'C'  'C'   0.0033   0.0016 
 'International Tables Vol C Tables 4.2.6.8 and 6.1.1.4' 
 'H'  'H'   0.0000   0.0000 
 'International Tables Vol C Tables 4.2.6.8 and 6.1.1.4' 
 'N'  'N'   0.0061   0.0033 
 'International Tables Vol C Tables 4.2.6.8 and 6.1.1.4' 
 'O'  'O'   0.0106   0.0060 
 'International Tables Vol C Tables 4.2.6.8 and 6.1.1.4' 
 'S'  'S'   0.1246   0.1234 
 'International Tables Vol C Tables 4.2.6.8 and 6.1.1.4' 
 'Co'  'Co'   0.3494   0.9721 
 'International Tables Vol C Tables 4.2.6.8 and 6.1.1.4' 
  
_space_group_crystal_system       triclinic 
_space_group_IT_number            2 
_space_group_name_H-M_alt         'P -1' 
_space_group_name_Hall            '-P 1' 
  
_shelx_space_group_comment 
; 
The symmetry employed for this shelxl refinement is uniquely defined 
by the following loop, which should always be used as a source of 
symmetry information in preference to the above space-group names. 
They are only intended as comments. 
; 
  
loop_ 
 _space_group_symop_operation_xyz 
 'x, y, z' 
 '-x, -y, -z' 
  
_cell_length_a                    12.0281(8) 
_cell_length_b                    12.3628(9) 
_cell_length_c                    12.5821(9) 
_cell_angle_alpha                 110.490(3) 
_cell_angle_beta                  99.692(3) 
_cell_angle_gamma                 108.754(3) 
_cell_volume                      1574.1(2) 
_cell_formula_units_Z             2 
_cell_measurement_temperature     296(2) 
_cell_measurement_reflns_used     9979 
_cell_measurement_theta_min       2.89 
_cell_measurement_theta_max       28.39 
  
_exptl_crystal_description        block 
_exptl_crystal_colour             red 
_exptl_crystal_density_meas       ? 
_exptl_crystal_density_method     ? 
_exptl_crystal_density_diffrn     1.518 
_exptl_crystal_F_000              746 
_exptl_transmission_factor_min    ? 
_exptl_transmission_factor_max    ? 
_exptl_crystal_size_max           0.500 
_exptl_crystal_size_mid           0.300 
_exptl_crystal_size_min           0.200 
_exptl_absorpt_coefficient_mu     0.682 
_shelx_estimated_absorpt_T_min    0.727 
_shelx_estimated_absorpt_T_max    0.876 
_exptl_absorpt_correction_type    multi_scan 
_exptl_absorpt_correction_T_min   0.6597 
_exptl_absorpt_correction_T_max   0.7457 
_exptl_absorpt_process_details     'SADABS V2008/1 (Bruker AXS, 2008)'  
_exptl_absorpt_special_details    ? 
_diffrn_ambient_temperature       296(2) 
_diffrn_radiation_wavelength      0.71073 
_diffrn_radiation_type            MoK\a 
_diffrn_source                    ? 
_diffrn_measurement_device_type   'Bruker APEX-II CCD' 
_diffrn_measurement_method        '\f and \w scans' 
_diffrn_detector_area_resol_mean  ? 
_diffrn_reflns_number             27550 
_diffrn_reflns_av_unetI/netI      0.0228 
_diffrn_reflns_av_R_equivalents   0.0276 
_diffrn_reflns_limit_h_min        -16 
_diffrn_reflns_limit_h_max        15 
_diffrn_reflns_limit_k_min        -14 
_diffrn_reflns_limit_k_max        16 
_diffrn_reflns_limit_l_min        -16 
_diffrn_reflns_limit_l_max        15 
_diffrn_reflns_theta_min          1.822 
_diffrn_reflns_theta_max          28.390 
_diffrn_reflns_theta_full         25.242 
_diffrn_measured_fraction_theta_max   0.982 
_diffrn_measured_fraction_theta_full  0.999 
_diffrn_reflns_Laue_measured_fraction_max    0.982 
_diffrn_reflns_Laue_measured_fraction_full   0.999 
_diffrn_reflns_point_group_measured_fraction_max   0.982 
_diffrn_reflns_point_group_measured_fraction_full  0.999 
_reflns_number_total              7756 
_reflns_number_gt                 7237 
_reflns_threshold_expression      'I > 2\s(I)' 
_reflns_Friedel_coverage          0.000 
_reflns_Friedel_fraction_max      . 
_reflns_Friedel_fraction_full     . 
  
_reflns_special_details 
; 
 Reflections were merged by SHELXL according to the crystal 
 class for the calculation of statistics and refinement. 
  
 _reflns_Friedel_fraction is defined as the number of unique 
 Friedel pairs measured divided by the number that would be 
 possible theoretically, ignoring centric projections and 
 systematic absences. 
; 
  
_computing_data_collection        'Bruker APEX2' 
_computing_cell_refinement        'Bruker SAINT' 
_computing_data_reduction         'Bruker SAINT' 
_computing_structure_solution     'SHELXS-97 (Sheldrick 2008)' 
_computing_structure_refinement 'SHELXL-2017/1 (Sheldrick, 2017)' 
_computing_molecular_graphics     'Bruker SHELXTL' 
_computing_publication_material   'Bruker SHELXTL' 
_refine_special_details           ? 
_refine_ls_structure_factor_coef  Fsqd 
_refine_ls_matrix_type            full 
_refine_ls_weighting_scheme       calc 
_refine_ls_weighting_details 
'w=1/[\s^2^(Fo^2^)+(0.0477P)^2^+2.2048P] where P=(Fo^2^+2Fc^2^)/3' 
_atom_sites_solution_primary      ? 
_atom_sites_solution_secondary    ? 
_atom_sites_solution_hydrogens    mixed 
_refine_ls_hydrogen_treatment     constr 
_refine_ls_extinction_method      none 
_refine_ls_extinction_coef        . 
_refine_ls_number_reflns          7756 
_refine_ls_number_parameters      452 
_refine_ls_number_restraints      0 
_refine_ls_R_factor_all           0.0440 
_refine_ls_R_factor_gt            0.0413 
_refine_ls_wR_factor_ref          0.1089 
_refine_ls_wR_factor_gt           0.1070 
_refine_ls_goodness_of_fit_ref    1.048 
_refine_ls_restrained_S_all       1.048 
_refine_ls_shift/su_max           0.002 
_refine_ls_shift/su_mean          0.000 
  
loop_ 
 _atom_site_label 
 _atom_site_type_symbol 
 _atom_site_fract_x 
 _atom_site_fract_y 
 _atom_site_fract_z 
 _atom_site_U_iso_or_equiv 
 _atom_site_adp_type 
 _atom_site_occupancy 
 _atom_site_site_symmetry_order 
 _atom_site_calc_flag 
 _atom_site_refinement_flags_posn 
 _atom_site_refinement_flags_adp 
 _atom_site_refinement_flags_occupancy 
 _atom_site_disorder_assembly 
 _atom_site_disorder_group 
Co Co 0.90299(2) 0.83669(2) 0.68231(2) 0.01399(8) Uani 1 1 d . . . . . 
S S 1.22263(4) 0.60262(5) 1.17869(5) 0.02218(11) Uani 1 1 d . . . . . 
O1 O 0.84413(16) 0.78316(17) 1.13278(16) 0.0398(4) Uani 1 1 d . . . . . 
O2 O 0.62191(14) 0.49095(15) 1.08698(14) 0.0297(3) Uani 1 1 d . . . . . 
O3 O 1.00416(13) 0.82308(15) 0.81886(12) 0.0223(3) Uani 1 1 d . . . . . 
O4 O 1.19858(13) 0.89581(15) 0.81657(16) 0.0286(3) Uani 1 1 d . . . . . 
O5 O 1.22295(14) 0.48677(14) 1.09747(14) 0.0273(3) Uani 1 1 d . . . . . 
O6 O 1.13287(14) 0.59337(17) 1.24210(14) 0.0298(3) Uani 1 1 d . . . . . 
O7 O 1.79907(12) 0.85003(13) 1.54371(12) 0.0176(3) Uani 1 1 d . . . . . 
O8 O 1.74483(14) 1.00809(14) 1.63216(15) 0.0289(3) Uani 1 1 d . . . . . 
O9 O 0.92610(13) 1.01770(13) 0.80572(12) 0.0198(3) Uani 1 1 d . . . . . 
H9C H 0.878763 1.042781 0.772908 0.024 Uiso 1 1 d R U . . . 
H9D H 1.000552 1.069688 0.826578 0.024 Uiso 1 1 d R U . . . 
O10 O 1.06521(15) 0.92428(19) 0.64046(14) 0.0398(5) Uani 1 1 d . . . . . 
H10A H 1.118384 0.981862 0.706669 0.048 Uiso 1 1 d R U . . . 
H10B H 1.052794 0.961162 0.596859 0.048 Uiso 1 1 d R U . . . 
N1 N 0.73863(14) 0.75880(15) 0.72514(14) 0.0153(3) Uani 1 1 d . . . . . 
N2 N 0.63714(17) 0.69252(17) 1.03823(15) 0.0272(4) Uani 1 1 d . . . . . 
H2A H 0.568503 0.630214 1.021745 0.033 Uiso 1 1 calc R U . . . 
N3 N 0.82563(17) 0.59373(18) 1.19863(15) 0.0280(4) Uani 1 1 d . . . . . 
H3A H 0.889615 0.664658 1.229102 0.034 Uiso 1 1 calc R U . . . 
N4 N 0.87241(14) 0.65107(15) 1.55664(14) 0.0162(3) Uani 1 1 d . . . . . 
C1 C 0.63188(17) 0.67741(18) 0.63718(17) 0.0179(4) Uani 1 1 d . . . . . 
H1A H 0.631777 0.652667 0.558321 0.022 Uiso 1 1 calc R U . . . 
C2 C 0.52179(19) 0.6287(2) 0.65898(19) 0.0263(4) Uani 1 1 d . . . . . 
H2B H 0.449189 0.572570 0.595956 0.032 Uiso 1 1 calc R U . . . 
C3 C 0.5217(2) 0.6650(2) 0.7760(2) 0.0300(5) Uani 1 1 d . . . . . 
H3B H 0.448735 0.633788 0.792720 0.036 Uiso 1 1 calc R U . . . 
C4 C 0.63142(19) 0.74836(19) 0.86857(18) 0.0216(4) Uani 1 1 d . . . . . 
C5 C 0.73775(17) 0.79337(17) 0.83865(16) 0.0173(3) Uani 1 1 d . . . . . 
H5B H 0.811506 0.849920 0.900045 0.021 Uiso 1 1 calc R U . . . 
C6 C 0.6348(2) 0.7893(2) 0.99779(18) 0.0280(5) Uani 1 1 d . . . . . 
H6B H 0.707725 0.867331 1.047716 0.034 Uiso 1 1 calc R U . . . 
H6C H 0.562535 0.805912 1.006438 0.034 Uiso 1 1 calc R U . . . 
C7 C 0.7408(2) 0.6971(2) 1.09919(18) 0.0286(5) Uani 1 1 d . . . . . 
C8 C 0.7230(2) 0.5821(2) 1.12750(17) 0.0265(5) Uani 1 1 d . . . . . 
C9 C 0.8346(2) 0.4917(2) 1.22723(18) 0.0258(4) Uani 1 1 d . . . . . 
H9A H 0.908215 0.481260 1.213491 0.031 Uiso 1 1 calc R U . . . 
H9B H 0.763692 0.413584 1.172607 0.031 Uiso 1 1 calc R U . . . 
C10 C 0.83994(17) 0.51171(19) 1.35389(17) 0.0192(4) Uani 1 1 d . . . . . 
C11 C 0.8281(2) 0.41309(19) 1.38705(19) 0.0248(4) Uani 1 1 d . . . . . 
H11A H 0.813066 0.333179 1.330495 0.030 Uiso 1 1 calc R U . . . 
C12 C 0.8388(2) 0.4351(2) 1.5051(2) 0.0254(4) Uani 1 1 d . . . . . 
H12A H 0.830968 0.370387 1.528684 0.030 Uiso 1 1 calc R U . . . 
C13 C 0.86131(18) 0.55559(19) 1.58719(17) 0.0204(4) Uani 1 1 d . . . . . 
H13A H 0.868987 0.570513 1.666390 0.025 Uiso 1 1 calc R U . . . 
C14 C 0.86162(17) 0.62877(18) 1.44158(16) 0.0175(3) Uani 1 1 d . . . . . 
H14A H 0.869053 0.694937 1.420178 0.021 Uiso 1 1 calc R U . . . 
C15 C 1.11644(17) 0.84424(17) 0.85471(17) 0.0182(4) Uani 1 1 d . . . . . 
C16 C 1.14920(17) 0.79794(17) 0.94689(17) 0.0180(4) Uani 1 1 d . . . . . 
C17 C 1.27155(18) 0.82151(19) 0.99979(19) 0.0229(4) Uani 1 1 d . . . . . 
H17A H 1.335766 0.873735 0.984639 0.027 Uiso 1 1 calc R U . . . 
C18 C 1.29732(18) 0.7668(2) 1.0752(2) 0.0244(4) Uani 1 1 d . . . . . 
H18A H 1.378474 0.781114 1.109643 0.029 Uiso 1 1 calc R U . . . 
C19 C 1.20025(17) 0.69036(19) 1.09845(18) 0.0204(4) Uani 1 1 d . . . . . 
C20 C 1.07863(17) 0.67143(19) 1.05085(17) 0.0202(4) Uani 1 1 d . . . . . 
H20A H 1.014908 0.623365 1.069776 0.024 Uiso 1 1 calc R U . . . 
C21 C 1.05397(17) 0.72515(18) 0.97502(17) 0.0191(4) Uani 1 1 d . . . . . 
H21A H 0.972963 0.712555 0.942448 0.023 Uiso 1 1 calc R U . . . 
C22 C 1.37131(17) 0.69362(19) 1.28434(18) 0.0213(4) Uani 1 1 d . . . . . 
C23 C 1.46809(19) 0.6611(2) 1.26253(19) 0.0253(4) Uani 1 1 d . . . . . 
H23A H 1.455862 0.594483 1.191256 0.030 Uiso 1 1 calc R U . . . 
C24 C 1.58357(18) 0.7302(2) 1.34937(19) 0.0247(4) Uani 1 1 d . . . . . 
H24A H 1.649472 0.709270 1.336888 0.030 Uiso 1 1 calc R U . . . 
C25 C 1.60103(17) 0.83054(18) 1.45504(18) 0.0191(4) Uani 1 1 d . . . . . 
C26 C 1.50295(19) 0.86178(19) 1.4744(2) 0.0255(4) Uani 1 1 d . . . . . 
H26A H 1.515339 0.929372 1.544938 0.031 Uiso 1 1 calc R U . . . 
C27 C 1.38676(19) 0.7931(2) 1.3894(2) 0.0274(5) Uani 1 1 d . . . . . 
H27A H 1.320539 0.813119 1.402340 0.033 Uiso 1 1 calc R U . . . 
C28 C 1.72468(17) 0.90332(18) 1.55176(18) 0.0190(4) Uani 1 1 d . . . . . 
O11 O 1.0222(2) 0.8598(2) 0.3897(2) 0.0288(8) Uani 0.622(6) 1 d . . P A 1 
H11B H 1.010907 0.906729 0.357134 0.035 Uiso 0.622(6) 1 d R U P A 1 
H11C H 1.085737 0.846859 0.379564 0.035 Uiso 0.622(6) 1 d R U P A 1 
O11' O 1.0680(5) 0.7913(6) 0.3664(8) 0.077(3) Uani 0.378(6) 1 d . . P A 2 
H11E H 1.135796 0.808330 0.350618 0.092 Uiso 0.378(6) 1 d R U P A 2 
H11F H 1.002666 0.731710 0.311848 0.092 Uiso 0.378(6) 1 d R U P A 2 
O12 O 1.4480(3) 0.9644(5) 0.8591(3) 0.0374(9) Uani 0.5 1 d . . P B 1 
H12E H 1.393673 0.993926 0.868692 0.045 Uiso 1 1 d R U . B 1 
C29 C 1.4573(5) 0.9393(6) 0.7423(5) 0.0314(12) Uani 0.5 1 d . . P B 1 
H29A H 1.376357 0.905762 0.686217 0.047 Uiso 0.5 1 calc R U P B 1 
H29B H 1.492920 0.878788 0.720108 0.047 Uiso 0.5 1 calc R U P B 1 
H29C H 1.508957 1.016514 0.741683 0.047 Uiso 0.5 1 calc R U P B 1 
O12' O 1.4761(8) 0.9118(9) 0.7836(11) 0.136(4) Uani 0.5 1 d . . P C 2 
C29' C 1.4348(5) 0.9994(6) 0.7915(8) 0.0481(16) Uani 0.5 1 d . . P C 2 
H29D H 1.363906 0.966921 0.723027 0.072 Uiso 0.5 1 calc R U P C 2 
H29E H 1.498530 1.072071 0.794328 0.072 Uiso 0.5 1 calc R U P C 2 
H29F H 1.411870 1.023345 0.862929 0.072 Uiso 0.5 1 calc R U P C 2 
  
loop_ 
 _atom_site_aniso_label 
 _atom_site_aniso_U_11 
 _atom_site_aniso_U_22 
 _atom_site_aniso_U_33 
 _atom_site_aniso_U_23 
 _atom_site_aniso_U_13 
 _atom_site_aniso_U_12 
Co 0.00995(12) 0.01637(13) 0.01239(12) 0.00593(9) 0.00308(9) 0.00211(9) 
S 0.0119(2) 0.0243(2) 0.0245(2) 0.01209(19) -0.00038(17) 0.00190(18) 
O1 0.0260(8) 0.0351(9) 0.0337(9) 0.0160(8) 0.0006(7) -0.0134(7) 
O2 0.0197(7) 0.0269(8) 0.0275(8) 0.0097(6) 0.0072(6) -0.0059(6) 
O3 0.0127(6) 0.0336(8) 0.0176(6) 0.0108(6) 0.0027(5) 0.0074(6) 
O4 0.0137(6) 0.0284(8) 0.0468(9) 0.0225(7) 0.0085(6) 0.0060(6) 
O5 0.0196(7) 0.0225(7) 0.0300(8) 0.0105(6) -0.0005(6) 0.0021(6) 
O6 0.0150(7) 0.0421(9) 0.0302(8) 0.0208(7) 0.0045(6) 0.0050(6) 
O7 0.0141(6) 0.0215(6) 0.0186(6) 0.0107(5) 0.0045(5) 0.0073(5) 
O8 0.0163(7) 0.0200(7) 0.0368(9) 0.0028(6) -0.0005(6) 0.0061(6) 
O9 0.0178(6) 0.0160(6) 0.0184(6) 0.0062(5) 0.0033(5) 0.0008(5) 
O10 0.0184(7) 0.0570(11) 0.0196(7) 0.0090(7) 0.0073(6) -0.0058(7) 
N1 0.0130(7) 0.0154(7) 0.0159(7) 0.0067(6) 0.0053(6) 0.0038(6) 
N2 0.0245(9) 0.0239(9) 0.0179(8) 0.0060(7) 0.0093(7) -0.0060(7) 
N3 0.0228(9) 0.0275(9) 0.0145(7) 0.0059(7) 0.0040(6) -0.0082(7) 
N4 0.0130(7) 0.0198(7) 0.0161(7) 0.0077(6) 0.0051(6) 0.0069(6) 
C1 0.0166(8) 0.0166(8) 0.0156(8) 0.0056(7) 0.0046(7) 0.0026(7) 
C2 0.0160(9) 0.0250(10) 0.0215(9) 0.0041(8) 0.0042(7) -0.0036(8) 
C3 0.0192(10) 0.0301(11) 0.0260(10) 0.0074(9) 0.0120(8) -0.0045(8) 
C4 0.0212(9) 0.0188(9) 0.0184(9) 0.0061(7) 0.0090(7) 0.0016(7) 
C5 0.0164(8) 0.0151(8) 0.0168(8) 0.0065(7) 0.0052(7) 0.0028(7) 
C6 0.0295(11) 0.0229(10) 0.0196(9) 0.0045(8) 0.0132(8) -0.0010(8) 
C7 0.0256(10) 0.0268(10) 0.0151(9) 0.0055(8) 0.0069(8) -0.0073(8) 
C8 0.0233(10) 0.0261(10) 0.0150(9) 0.0053(8) 0.0083(7) -0.0050(8) 
C9 0.0207(9) 0.0261(10) 0.0171(9) 0.0024(8) 0.0086(7) 0.0000(8) 
C10 0.0111(8) 0.0218(9) 0.0180(8) 0.0051(7) 0.0057(7) 0.0019(7) 
C11 0.0228(10) 0.0184(9) 0.0266(10) 0.0040(8) 0.0093(8) 0.0063(8) 
C12 0.0288(11) 0.0224(10) 0.0285(10) 0.0129(8) 0.0101(8) 0.0123(8) 
C13 0.0200(9) 0.0247(10) 0.0184(9) 0.0105(8) 0.0056(7) 0.0104(8) 
C14 0.0134(8) 0.0213(9) 0.0169(8) 0.0082(7) 0.0060(7) 0.0054(7) 
C15 0.0130(8) 0.0123(8) 0.0206(9) 0.0015(7) 0.0008(7) 0.0032(6) 
C16 0.0125(8) 0.0144(8) 0.0196(8) 0.0025(7) 0.0008(7) 0.0039(7) 
C17 0.0109(8) 0.0210(9) 0.0301(10) 0.0104(8) 0.0016(7) 0.0017(7) 
C18 0.0104(8) 0.0258(10) 0.0304(10) 0.0122(8) -0.0004(7) 0.0030(7) 
C19 0.0131(8) 0.0217(9) 0.0212(9) 0.0078(7) 0.0009(7) 0.0048(7) 
C20 0.0112(8) 0.0222(9) 0.0212(9) 0.0071(7) 0.0026(7) 0.0035(7) 
C21 0.0110(8) 0.0195(9) 0.0206(9) 0.0046(7) 0.0016(7) 0.0050(7) 
C22 0.0129(8) 0.0228(9) 0.0242(9) 0.0123(8) -0.0008(7) 0.0035(7) 
C23 0.0172(9) 0.0298(11) 0.0214(9) 0.0075(8) 0.0033(8) 0.0063(8) 
C24 0.0143(9) 0.0313(11) 0.0240(10) 0.0091(8) 0.0037(7) 0.0083(8) 
C25 0.0128(8) 0.0176(8) 0.0246(9) 0.0115(7) 0.0013(7) 0.0033(7) 
C26 0.0206(10) 0.0177(9) 0.0313(11) 0.0058(8) -0.0002(8) 0.0092(8) 
C27 0.0163(9) 0.0244(10) 0.0362(11) 0.0085(9) 0.0002(8) 0.0111(8) 
C28 0.0127(8) 0.0177(8) 0.0244(9) 0.0111(7) 0.0029(7) 0.0029(7) 
O11 0.0253(13) 0.0296(14) 0.0240(13) 0.0148(11) 0.0060(10) -0.0004(10) 
O11' 0.025(3) 0.040(3) 0.181(8) 0.063(4) 0.034(4) 0.012(2) 
O12 0.0090(13) 0.077(3) 0.0237(16) 0.0202(18) 0.0088(12) 0.0137(16) 
C29 0.017(2) 0.040(3) 0.034(3) 0.015(2) 0.011(2) 0.007(2) 
O12' 0.077(5) 0.083(6) 0.183(12) 0.005(6) 0.005(7) 0.032(4) 
C29' 0.018(2) 0.032(3) 0.085(5) 0.015(3) 0.020(3) 0.008(2) 
  
_geom_special_details 
; 
 All esds (except the esd in the dihedral angle between two l.s. planes) 
 are estimated using the full covariance matrix.  The cell esds are taken 
 into account individually in the estimation of esds in distances, angles 
 and torsion angles; correlations between esds in cell parameters are only 
 used when they are defined by crystal symmetry.  An approximate (isotropic) 
 treatment of cell esds is used for estimating esds involving l.s. planes. 
; 
  
loop_ 
 _geom_bond_atom_site_label_1 
 _geom_bond_atom_site_label_2 
 _geom_bond_distance 
 _geom_bond_site_symmetry_2 
 _geom_bond_publ_flag 
Co O3 2.0225(14) . ? 
Co O7 2.0569(13) 1_454 ? 
Co O9 2.1256(14) . ? 
Co N4 2.1500(16) 1_554 ? 
Co N1 2.1503(16) . ? 
Co O10 2.1549(16) . ? 
S O5 1.4408(17) . ? 
S O6 1.4455(17) . ? 
S C22 1.758(2) . ? 
S C19 1.770(2) . ? 
O1 C7 1.231(3) . ? 
O2 C8 1.231(2) . ? 
O3 C15 1.257(2) . ? 
O4 C15 1.258(3) . ? 
O7 C28 1.268(2) . ? 
O8 C28 1.248(3) . ? 
O9 H9C 0.8454 . ? 
O9 H9D 0.8465 . ? 
O10 H10A 0.8500 . ? 
O10 H10B 0.8500 . ? 
N1 C1 1.341(2) . ? 
N1 C5 1.343(2) . ? 
N2 C7 1.322(3) . ? 
N2 C6 1.461(3) . ? 
N2 H2A 0.8600 . ? 
N3 C8 1.331(3) . ? 
N3 C9 1.457(3) . ? 
N3 H3A 0.8600 . ? 
N4 C13 1.339(3) . ? 
N4 C14 1.350(2) . ? 
C1 C2 1.384(3) . ? 
C1 H1A 0.9300 . ? 
C2 C3 1.381(3) . ? 
C2 H2B 0.9300 . ? 
C3 C4 1.388(3) . ? 
C3 H3B 0.9300 . ? 
C4 C5 1.392(3) . ? 
C4 C6 1.513(3) . ? 
C5 H5B 0.9300 . ? 
C6 H6B 0.9700 . ? 
C6 H6C 0.9700 . ? 
C7 C8 1.542(3) . ? 
C9 C10 1.512(3) . ? 
C9 H9A 0.9700 . ? 
C9 H9B 0.9700 . ? 
C10 C14 1.387(3) . ? 
C10 C11 1.395(3) . ? 
C11 C12 1.388(3) . ? 
C11 H11A 0.9300 . ? 
C12 C13 1.389(3) . ? 
C12 H12A 0.9300 . ? 
C13 H13A 0.9300 . ? 
C14 H14A 0.9300 . ? 
C15 C16 1.511(3) . ? 
C16 C21 1.394(3) . ? 
C16 C17 1.397(3) . ? 
C17 C18 1.392(3) . ? 
C17 H17A 0.9300 . ? 
C18 C19 1.393(3) . ? 
C18 H18A 0.9300 . ? 
C19 C20 1.393(3) . ? 
C20 C21 1.384(3) . ? 
C20 H20A 0.9300 . ? 
C21 H21A 0.9300 . ? 
C22 C23 1.387(3) . ? 
C22 C27 1.388(3) . ? 
C23 C24 1.388(3) . ? 
C23 H23A 0.9300 . ? 
C24 C25 1.391(3) . ? 
C24 H24A 0.9300 . ? 
C25 C26 1.387(3) . ? 
C25 C28 1.505(3) . ? 
C26 C27 1.384(3) . ? 
C26 H26A 0.9300 . ? 
C27 H27A 0.9300 . ? 
O11 H11B 0.8500 . ? 
O11 H11C 0.8500 . ? 
O11' H11E 0.8500 . ? 
O11' H11F 0.8500 . ? 
O12 C29 1.424(7) . ? 
O12 H12E 0.8502 . ? 
C29 H29A 0.9600 . ? 
C29 H29B 0.9600 . ? 
C29 H29C 0.9600 . ? 
O12' C29' 1.309(10) . ? 
C29' H29D 0.9600 . ? 
C29' H29E 0.9600 . ? 
C29' H29F 0.9600 . ? 
  
loop_ 
 _geom_angle_atom_site_label_1 
 _geom_angle_atom_site_label_2 
 _geom_angle_atom_site_label_3 
 _geom_angle 
 _geom_angle_site_symmetry_1 
 _geom_angle_site_symmetry_3 
 _geom_angle_publ_flag 
O3 Co O7 179.62(6) . 1_454 ? 
O3 Co O9 88.45(6) . . ? 
O7 Co O9 91.53(6) 1_454 . ? 
O3 Co N4 92.41(6) . 1_554 ? 
O7 Co N4 87.59(6) 1_454 1_554 ? 
O9 Co N4 177.88(6) . 1_554 ? 
O3 Co N1 89.68(6) . . ? 
O7 Co N1 89.94(6) 1_454 . ? 
O9 Co N1 87.07(6) . . ? 
N4 Co N1 91.00(6) 1_554 . ? 
O3 Co O10 92.23(7) . . ? 
O7 Co O10 88.15(6) 1_454 . ? 
O9 Co O10 90.18(7) . . ? 
N4 Co O10 91.72(7) 1_554 . ? 
N1 Co O10 176.60(7) . . ? 
O5 S O6 118.07(10) . . ? 
O5 S C22 107.58(10) . . ? 
O6 S C22 108.40(10) . . ? 
O5 S C19 108.57(10) . . ? 
O6 S C19 107.36(10) . . ? 
C22 S C19 106.29(9) . . ? 
C15 O3 Co 132.91(14) . . ? 
C28 O7 Co 125.58(13) . 1_656 ? 
Co O9 H9C 109.5 . . ? 
Co O9 H9D 109.2 . . ? 
H9C O9 H9D 109.5 . . ? 
Co O10 H10A 106.1 . . ? 
Co O10 H10B 113.0 . . ? 
H10A O10 H10B 106.4 . . ? 
C1 N1 C5 118.13(16) . . ? 
C1 N1 Co 119.94(12) . . ? 
C5 N1 Co 121.86(12) . . ? 
C7 N2 C6 122.49(18) . . ? 
C7 N2 H2A 118.8 . . ? 
C6 N2 H2A 118.8 . . ? 
C8 N3 C9 122.99(18) . . ? 
C8 N3 H3A 118.5 . . ? 
C9 N3 H3A 118.5 . . ? 
C13 N4 C14 118.41(17) . . ? 
C13 N4 Co 122.71(13) . 1_556 ? 
C14 N4 Co 118.87(13) . 1_556 ? 
N1 C1 C2 122.66(18) . . ? 
N1 C1 H1A 118.7 . . ? 
C2 C1 H1A 118.7 . . ? 
C3 C2 C1 118.80(19) . . ? 
C3 C2 H2B 120.6 . . ? 
C1 C2 H2B 120.6 . . ? 
C2 C3 C4 119.53(19) . . ? 
C2 C3 H3B 120.2 . . ? 
C4 C3 H3B 120.2 . . ? 
C3 C4 C5 117.91(18) . . ? 
C3 C4 C6 120.89(18) . . ? 
C5 C4 C6 121.20(18) . . ? 
N1 C5 C4 122.96(17) . . ? 
N1 C5 H5B 118.5 . . ? 
C4 C5 H5B 118.5 . . ? 
N2 C6 C4 111.61(18) . . ? 
N2 C6 H6B 109.3 . . ? 
C4 C6 H6B 109.3 . . ? 
N2 C6 H6C 109.3 . . ? 
C4 C6 H6C 109.3 . . ? 
H6B C6 H6C 108.0 . . ? 
O1 C7 N2 125.4(2) . . ? 
O1 C7 C8 120.7(2) . . ? 
N2 C7 C8 113.94(18) . . ? 
O2 C8 N3 125.3(2) . . ? 
O2 C8 C7 121.4(2) . . ? 
N3 C8 C7 113.26(18) . . ? 
N3 C9 C10 114.88(17) . . ? 
N3 C9 H9A 108.5 . . ? 
C10 C9 H9A 108.5 . . ? 
N3 C9 H9B 108.5 . . ? 
C10 C9 H9B 108.5 . . ? 
H9A C9 H9B 107.5 . . ? 
C14 C10 C11 117.90(18) . . ? 
C14 C10 C9 121.57(19) . . ? 
C11 C10 C9 120.48(18) . . ? 
C12 C11 C10 119.50(19) . . ? 
C12 C11 H11A 120.3 . . ? 
C10 C11 H11A 120.3 . . ? 
C11 C12 C13 118.74(19) . . ? 
C11 C12 H12A 120.6 . . ? 
C13 C12 H12A 120.6 . . ? 
N4 C13 C12 122.47(18) . . ? 
N4 C13 H13A 118.8 . . ? 
C12 C13 H13A 118.8 . . ? 
N4 C14 C10 122.98(18) . . ? 
N4 C14 H14A 118.5 . . ? 
C10 C14 H14A 118.5 . . ? 
O3 C15 O4 124.78(19) . . ? 
O3 C15 C16 115.28(17) . . ? 
O4 C15 C16 119.89(17) . . ? 
C21 C16 C17 119.69(19) . . ? 
C21 C16 C15 118.77(17) . . ? 
C17 C16 C15 121.47(18) . . ? 
C18 C17 C16 119.99(19) . . ? 
C18 C17 H17A 120.0 . . ? 
C16 C17 H17A 120.0 . . ? 
C17 C18 C19 119.31(18) . . ? 
C17 C18 H18A 120.3 . . ? 
C19 C18 H18A 120.3 . . ? 
C20 C19 C18 121.08(19) . . ? 
C20 C19 S 116.59(15) . . ? 
C18 C19 S 122.13(15) . . ? 
C21 C20 C19 119.06(18) . . ? 
C21 C20 H20A 120.5 . . ? 
C19 C20 H20A 120.5 . . ? 
C20 C21 C16 120.74(17) . . ? 
C20 C21 H21A 119.6 . . ? 
C16 C21 H21A 119.6 . . ? 
C23 C22 C27 122.11(18) . . ? 
C23 C22 S 119.28(16) . . ? 
C27 C22 S 118.56(16) . . ? 
C22 C23 C24 118.6(2) . . ? 
C22 C23 H23A 120.7 . . ? 
C24 C23 H23A 120.7 . . ? 
C23 C24 C25 120.18(19) . . ? 
C23 C24 H24A 119.9 . . ? 
C25 C24 H24A 119.9 . . ? 
C26 C25 C24 120.16(18) . . ? 
C26 C25 C28 119.08(18) . . ? 
C24 C25 C28 120.71(18) . . ? 
C27 C26 C25 120.5(2) . . ? 
C27 C26 H26A 119.8 . . ? 
C25 C26 H26A 119.8 . . ? 
C26 C27 C22 118.50(19) . . ? 
C26 C27 H27A 120.7 . . ? 
C22 C27 H27A 120.7 . . ? 
O8 C28 O7 125.96(18) . . ? 
O8 C28 C25 118.41(17) . . ? 
O7 C28 C25 115.63(17) . . ? 
H11B O11 H11C 109.5 . . ? 
H11E O11' H11F 118.6 . . ? 
C29 O12 H12E 109.6 . . ? 
O12 C29 H29A 109.5 . . ? 
O12 C29 H29B 109.5 . . ? 
H29A C29 H29B 109.5 . . ? 
O12 C29 H29C 109.5 . . ? 
H29A C29 H29C 109.5 . . ? 
H29B C29 H29C 109.5 . . ? 
O12' C29' H29D 109.5 . . ? 
O12' C29' H29E 109.5 . . ? 
H29D C29' H29E 109.5 . . ? 
O12' C29' H29F 109.5 . . ? 
H29D C29' H29F 109.5 . . ? 
H29E C29' H29F 109.5 . . ? 
  
_refine_diff_density_max    1.664 
_refine_diff_density_min   -1.003 
_refine_diff_density_rms    0.074 
  
_shelx_res_file 
; 
TITL 12457_0m in P-1 
    12457_0m.res 
    created by SHELXL-2017/1 at 17:11:11 on 06-Jan-2021 
CELL 0.71073  12.02810  12.36280  12.58210 110.4903  99.6921 108.7539 
ZERR    2.00   0.00080   0.00090   0.00090   0.0030   0.0029   0.0029 
LATT  1 
SFAC C H N O S CO 
UNIT 58 64 8 24 2 2 
TEMP 23.000 
SIZE 0.20 0.30 0.50 
  
L.S. 8 
BOND  $H 
FMAP 2 
PLAN 20 
acta 
  
WGHT    0.047700    2.204800 
FVAR       0.18234   0.62179 
CO    6    0.902993    0.836688    0.682313    11.00000    0.00995    0.01637 = 
         0.01239    0.00593    0.00308    0.00211 
S     5    1.222630    0.602623    1.178695    11.00000    0.01190    0.02428 = 
         0.02451    0.01209   -0.00038    0.00190 
O1    4    0.844128    0.783164    1.132785    11.00000    0.02602    0.03509 = 
         0.03371    0.01598    0.00062   -0.01344 
O2    4    0.621912    0.490948    1.086976    11.00000    0.01965    0.02685 = 
         0.02745    0.00972    0.00719   -0.00594 
O3    4    1.004156    0.823084    0.818858    11.00000    0.01267    0.03363 = 
         0.01765    0.01078    0.00270    0.00739 
O4    4    1.198578    0.895813    0.816574    11.00000    0.01366    0.02841 = 
         0.04677    0.02253    0.00855    0.00599 
O5    4    1.222954    0.486774    1.097466    11.00000    0.01958    0.02249 = 
         0.03004    0.01049   -0.00054    0.00212 
O6    4    1.132875    0.593368    1.242103    11.00000    0.01500    0.04210 = 
         0.03019    0.02075    0.00452    0.00500 
O7    4    1.799073    0.850026    1.543712    11.00000    0.01410    0.02155 = 
         0.01858    0.01068    0.00453    0.00734 
O8    4    1.744830    1.008093    1.632163    11.00000    0.01626    0.01997 = 
         0.03680    0.00278   -0.00048    0.00613 
O9    4    0.926103    1.017701    0.805719    11.00000    0.01782    0.01596 = 
         0.01836    0.00620    0.00329    0.00081 
AFIX   3 
H9C   2    0.878763    1.042781    0.772908    11.00000   -1.20000 
H9D   2    1.000552    1.069688    0.826578    11.00000   -1.20000 
AFIX   0 
O10   4    1.065214    0.924282    0.640459    11.00000    0.01845    0.05696 = 
         0.01960    0.00904    0.00729   -0.00580 
AFIX   3 
H10A  2    1.118384    0.981862    0.706669    11.00000   -1.20000 
H10B  2    1.052794    0.961162    0.596859    11.00000   -1.20000 
AFIX   0 
N1    3    0.738625    0.758802    0.725139    11.00000    0.01303    0.01545 = 
         0.01595    0.00674    0.00533    0.00381 
N2    3    0.637143    0.692523    1.038225    11.00000    0.02454    0.02391 = 
         0.01794    0.00604    0.00935   -0.00598 
AFIX  43 
H2A   2    0.568503    0.630214    1.021745    11.00000   -1.20000 
AFIX   0 
N3    3    0.825627    0.593728    1.198625    11.00000    0.02276    0.02752 = 
         0.01451    0.00592    0.00402   -0.00819 
AFIX  43 
H3A   2    0.889615    0.664658    1.229102    11.00000   -1.20000 
AFIX   0 
N4    3    0.872415    0.651073    1.556641    11.00000    0.01305    0.01984 = 
         0.01606    0.00765    0.00515    0.00690 
C1    1    0.631879    0.677412    0.637179    11.00000    0.01657    0.01660 = 
         0.01559    0.00555    0.00460    0.00265 
AFIX  43 
H1A   2    0.631777    0.652667    0.558321    11.00000   -1.20000 
AFIX   0 
C2    1    0.521795    0.628705    0.658975    11.00000    0.01595    0.02503 = 
         0.02152    0.00413    0.00420   -0.00356 
AFIX  43 
H2B   2    0.449189    0.572570    0.595956    11.00000   -1.20000 
AFIX   0 
C3    1    0.521738    0.664994    0.776034    11.00000    0.01921    0.03013 = 
         0.02600    0.00741    0.01197   -0.00450 
AFIX  43 
H3B   2    0.448735    0.633788    0.792720    11.00000   -1.20000 
AFIX   0 
C4    1    0.631419    0.748363    0.868567    11.00000    0.02118    0.01885 = 
         0.01841    0.00611    0.00900    0.00156 
C5    1    0.737752    0.793366    0.838646    11.00000    0.01643    0.01508 = 
         0.01682    0.00647    0.00523    0.00279 
AFIX  43 
H5B   2    0.811506    0.849920    0.900045    11.00000   -1.20000 
AFIX   0 
C6    1    0.634806    0.789280    0.997788    11.00000    0.02952    0.02290 = 
         0.01956    0.00449    0.01323   -0.00096 
AFIX  23 
H6B   2    0.707725    0.867331    1.047716    11.00000   -1.20000 
H6C   2    0.562535    0.805912    1.006438    11.00000   -1.20000 
AFIX   0 
C7    1    0.740753    0.697097    1.099187    11.00000    0.02560    0.02676 = 
         0.01505    0.00549    0.00687   -0.00727 
C8    1    0.722958    0.582126    1.127496    11.00000    0.02330    0.02613 = 
         0.01501    0.00532    0.00826   -0.00498 
C9    1    0.834573    0.491740    1.227226    11.00000    0.02073    0.02610 = 
         0.01712    0.00244    0.00857   -0.00004 
AFIX  23 
H9A   2    0.908215    0.481260    1.213491    11.00000   -1.20000 
H9B   2    0.763692    0.413584    1.172607    11.00000   -1.20000 
AFIX   0 
C10   1    0.839938    0.511707    1.353891    11.00000    0.01107    0.02176 = 
         0.01802    0.00512    0.00566    0.00194 
C11   1    0.828051    0.413086    1.387047    11.00000    0.02278    0.01841 = 
         0.02661    0.00404    0.00933    0.00627 
AFIX  43 
H11A  2    0.813066    0.333179    1.330495    11.00000   -1.20000 
AFIX   0 
C12   1    0.838752    0.435095    1.505051    11.00000    0.02884    0.02236 = 
         0.02853    0.01286    0.01013    0.01225 
AFIX  43 
H12A  2    0.830968    0.370387    1.528684    11.00000   -1.20000 
AFIX   0 
C13   1    0.861308    0.555587    1.587191    11.00000    0.01996    0.02474 = 
         0.01842    0.01049    0.00563    0.01039 
AFIX  43 
H13A  2    0.868987    0.570513    1.666390    11.00000   -1.20000 
AFIX   0 
C14   1    0.861615    0.628775    1.441585    11.00000    0.01336    0.02129 = 
         0.01690    0.00816    0.00595    0.00540 
AFIX  43 
H14A  2    0.869053    0.694937    1.420178    11.00000   -1.20000 
AFIX   0 
C15   1    1.116438    0.844244    0.854712    11.00000    0.01302    0.01232 = 
         0.02060    0.00150    0.00082    0.00323 
C16   1    1.149196    0.797941    0.946894    11.00000    0.01248    0.01435 = 
         0.01963    0.00254    0.00078    0.00389 
C17   1    1.271550    0.821508    0.999790    11.00000    0.01088    0.02103 = 
         0.03005    0.01040    0.00165    0.00167 
AFIX  43 
H17A  2    1.335766    0.873735    0.984639    11.00000   -1.20000 
AFIX   0 
C18   1    1.297315    0.766793    1.075178    11.00000    0.01037    0.02583 = 
         0.03039    0.01219   -0.00040    0.00298 
AFIX  43 
H18A  2    1.378474    0.781114    1.109643    11.00000   -1.20000 
AFIX   0 
C19   1    1.200248    0.690359    1.098452    11.00000    0.01315    0.02175 = 
         0.02117    0.00781    0.00086    0.00485 
C20   1    1.078632    0.671430    1.050853    11.00000    0.01118    0.02220 = 
         0.02116    0.00708    0.00256    0.00354 
AFIX  43 
H20A  2    1.014908    0.623365    1.069776    11.00000   -1.20000 
AFIX   0 
C21   1    1.053969    0.725147    0.975021    11.00000    0.01099    0.01949 = 
         0.02059    0.00460    0.00156    0.00496 
AFIX  43 
H21A  2    0.972963    0.712555    0.942448    11.00000   -1.20000 
AFIX   0 
C22   1    1.371308    0.693619    1.284338    11.00000    0.01289    0.02277 = 
         0.02417    0.01230   -0.00076    0.00353 
C23   1    1.468089    0.661112    1.262531    11.00000    0.01721    0.02977 = 
         0.02141    0.00746    0.00326    0.00633 
AFIX  43 
H23A  2    1.455862    0.594483    1.191256    11.00000   -1.20000 
AFIX   0 
C24   1    1.583566    0.730159    1.349366    11.00000    0.01432    0.03125 = 
         0.02403    0.00909    0.00375    0.00825 
AFIX  43 
H24A  2    1.649472    0.709270    1.336888    11.00000   -1.20000 
AFIX   0 
C25   1    1.601026    0.830544    1.455036    11.00000    0.01284    0.01758 = 
         0.02461    0.01148    0.00127    0.00327 
C26   1    1.502948    0.861780    1.474361    11.00000    0.02062    0.01767 = 
         0.03132    0.00583   -0.00024    0.00916 
AFIX  43 
H26A  2    1.515339    0.929372    1.544938    11.00000   -1.20000 
AFIX   0 
C27   1    1.386758    0.793073    1.389356    11.00000    0.01627    0.02440 = 
         0.03620    0.00854    0.00022    0.01108 
AFIX  43 
H27A  2    1.320539    0.813119    1.402340    11.00000   -1.20000 
AFIX   0 
C28   1    1.724683    0.903324    1.551762    11.00000    0.01268    0.01765 = 
         0.02439    0.01106    0.00293    0.00294 
PART   1 
O11   4    1.022217    0.859759    0.389724    21.00000    0.02535    0.02957 = 
         0.02395    0.01481    0.00601   -0.00041 
AFIX   3 
H11B  2    1.010907    0.906729    0.357134    21.00000   -1.20000 
H11C  2    1.085737    0.846859    0.379564    21.00000   -1.20000 
AFIX   0 
PART   2 
O11'  4    1.067956    0.791260    0.366358   -21.00000    0.02460    0.03990 = 
         0.18064    0.06319    0.03430    0.01202 
AFIX   3 
H11E  2    1.135796    0.808330    0.350618   -21.00000   -1.20000 
H11F  2    1.002666    0.731710    0.311848   -21.00000   -1.20000 
AFIX   0 
PART   1 
O12   4    1.447963    0.964436    0.859062    10.50000    0.00899    0.07651 = 
         0.02372    0.02023    0.00877    0.01372 
AFIX   3 
H12E  2    1.393673    0.993926    0.868692    11.00000   -1.20000 
AFIX   0 
C29   1    1.457311    0.939330    0.742252    10.50000    0.01745    0.03961 = 
         0.03390    0.01505    0.01133    0.00717 
AFIX 133 
H29A  2    1.376357    0.905762    0.686217    10.50000   -1.50000 
H29B  2    1.492920    0.878788    0.720108    10.50000   -1.50000 
H29C  2    1.508957    1.016514    0.741683    10.50000   -1.50000 
AFIX   0 
PART   2 
O12'  4    1.476055    0.911783    0.783625    10.50000    0.07724    0.08291 = 
         0.18344    0.00458    0.00474    0.03233 
C29'  1    1.434840    0.999374    0.791503    10.50000    0.01794    0.03150 = 
         0.08538    0.01530    0.01982    0.00815 
AFIX 133 
H29D  2    1.363906    0.966921    0.723027    10.50000   -1.50000 
H29E  2    1.498530    1.072071    0.794328    10.50000   -1.50000 
H29F  2    1.411870    1.023345    0.862929    10.50000   -1.50000 
PART   0 
  
AFIX   0 
HKLF 4 
  
  
  
  
REM  12457_0m in P-1 
REM R1 =  0.0413 for    7237 Fo > 4sig(Fo)  and  0.0440 for all    7756 data 
REM    452 parameters refined using      0 restraints 
  
END 
  
WGHT      0.0477      2.2049 
  
REM Highest difference peak  1.664,  deepest hole -1.003,  1-sigma level  0.074 
Q1    1   1.1186  0.9989  0.6088  11.00000  0.05    1.66 
Q2    1   0.8792  0.8884  0.3643  11.00000  0.05    1.16 
Q3    1   1.1078  0.8989  0.6752  11.00000  0.05    0.71 
Q4    1   1.0724  0.8629  0.6291  11.00000  0.05    0.65 
Q5    1   1.5641  0.9530  0.7599  11.00000  0.05    0.52 
Q6    1   1.4119  0.8398  0.6914  11.00000  0.05    0.52 
Q7    1   0.8410  0.8170  1.1934  11.00000  0.05    0.47 
Q8    1   1.6581  0.8631  1.5025  11.00000  0.05    0.39 
Q9    1   0.7358  0.6398  1.1109  11.00000  0.05    0.39 
Q10   1   0.6245  0.7665  0.9276  11.00000  0.05    0.37 
Q11   1   1.3089  0.6518  1.2349  11.00000  0.05    0.36 
Q12   1   0.8469  0.5621  1.3974  11.00000  0.05    0.35 
Q13   1   0.9389  0.7952  0.6818  11.00000  0.05    0.34 
Q14   1   0.9578  0.9117  0.7159  11.00000  0.05    0.34 
Q15   1   1.3693  0.7194  1.3369  11.00000  0.05    0.34 
Q16   1   1.0568  0.8830  0.5561  11.00000  0.05    0.34 
Q17   1   0.8455  0.4930  1.5398  11.00000  0.05    0.33 
Q18   1   0.5846  0.6811  0.8225  11.00000  0.05    0.32 
Q19   1   1.1894  0.9191  0.8731  11.00000  0.05    0.32 
Q20   1   1.1357  0.8242  0.9021  11.00000  0.05    0.32 
; 
_shelx_res_checksum   48295 
  
_shelx_hkl_file 
; 
  -1   0   0  186.94    6.45 
  -1   0   0  178.36    6.41 
  -1   0   0  208.42    6.41 
   1   0   0  173.64    6.44 
   1   0   0  187.31    6.40 
   1   0   0  184.28    6.42 
   1   0   0  180.60    6.41 
  -2   0   0   75.00    2.58 
  -2   0   0   66.93    2.58 
  -2   0   0   75.88    2.58 
  -2   0   0   74.69    2.59 
   2   0   0   78.66    2.58 
   2   0   0   76.56    2.58 
   2   0   0   71.56    2.58 
   2   0   0   76.95    2.58 
   2   0   0   76.97    2.58 
  -3   0   0  326.34   12.31 
  -3   0   0  354.99   12.33 
  -3   0   0  344.82   12.29 
  -3   0   0  354.76   12.29 
   3   0   0  364.51   12.32 
   3   0   0  357.26   12.30 
   3   0   0  365.26   12.26 
   3   0   0  343.33   12.28 
   3   0   0  357.51   12.29 
   3   0   0  389.88   12.31 
  -4   0   0   78.21    2.75 
  -4   0   0   76.64    2.75 
  -4   0   0   81.42    2.75 
  -4   0   0   81.28    2.77 
   4   0   0   81.17    2.75 
   4   0   0   76.42    2.73 
   4   0   0   80.13    2.76 
   4   0   0   80.75    2.75 
   4   0   0   75.01    2.74 
   4   0   0   80.95    2.74 
  -5   0   0    0.52    0.08 
  -5   0   0    0.76    0.08 
  -5   0   0    0.43    0.08 
  -5   0   0    0.51    0.08 
   5   0   0    0.57    0.08 
   5   0   0    0.60    0.06 
   5   0   0    0.45    0.07 
   5   0   0    0.69    0.10 
   5   0   0    0.56    0.07 
  -6   0   0   31.34    1.13 
  -6   0   0   31.43    1.13 
  -6   0   0   31.26    1.13 
   6   0   0   30.85    1.14 
   6   0   0   33.30    1.11 
   6   0   0   33.24    1.13 
   6   0   0   29.31    1.11 
   6   0   0   31.71    1.11 
   6   0   0   30.46    1.14 
  -7   0   0   16.04    0.61 
  -7   0   0   15.40    0.61 
  -7   0   0   15.57    0.60 
   7   0   0   15.78    0.62 
   7   0   0   16.50    0.58 
   7   0   0   15.04    0.60 
   7   0   0   15.29    0.58 
   7   0   0   16.50    0.59 
   7   0   0   16.29    0.63 
  -8   0   0   50.12    1.74 
  -8   0   0   49.05    1.73 
   8   0   0   47.87    1.70 
   8   0   0   51.12    1.72 
   8   0   0   46.18    1.75 
   8   0   0   46.39    1.69 
   8   0   0   47.40    1.70 
   8   0   0   48.88    1.74 
  -9   0   0    1.72    0.16 
  -9   0   0    1.52    0.16 
   9   0   0    1.42    0.12 
   9   0   0    1.52    0.16 
   9   0   0    1.98    0.20 
   9   0   0    1.46    0.18 
   9   0   0    1.70    0.12 
 -10   0   0    2.88    0.22 
  10   0   0    3.10    0.25 
  10   0   0    3.14    0.25 
  10   0   0    3.27    0.16 
 -11   0   0   24.02    0.94 
  11   0   0   23.73    0.85 
  11   0   0   24.61    0.96 
  11   0   0   23.52    0.96 
 -12   0   0    0.68    0.13 
  12   0   0    0.56    0.16 
 -13   0   0    4.34    0.30 
  13   0   0    4.47    0.35 
  13   0   0    4.01    0.32 
 -14   0   0    3.59    0.30 
  14   0   0    4.17    0.36 
  14  -1   0    4.26    0.35 
 -14   1   0    4.29    0.31 
  13  -1   0    1.92    0.26 
  13  -1   0    1.79    0.23 
 -13   1   0    1.88    0.22 
  12  -1   0   50.57    1.87 
  12  -1   0   49.94    1.87 
 -12   1   0   51.22    1.85 
  11  -1   0   21.44    0.86 
  11  -1   0   21.98    0.87 
 -11   1   0   20.82    0.84 
  10  -1   0    1.61    0.19 
  10  -1   0    1.67    0.11 
  10  -1   0    1.82    0.21 
 -10   1   0    1.77    0.17 
   9  -1   0    5.07    0.25 
   9  -1   0    4.98    0.29 
   9  -1   0    5.14    0.29 
   9  -1   0    5.33    0.23 
   9  -1   0    4.92    0.22 
  -9   1   0    5.28    0.27 
  -9   1   0    4.47    0.26 
   8  -1   0   27.85    1.06 
   8  -1   0   28.68    1.00 
   8  -1   0   28.37    1.01 
   8  -1   0   27.04    1.03 
   8  -1   0   29.28    1.06 
  -8   1   0   29.27    1.04 
  -8   1   0   28.72    1.05 
  -8   1   0   28.05    1.04 
   7  -1   0   92.15    3.29 
   7  -1   0   93.64    3.29 
   7  -1   0   94.38    3.33 
   7  -1   0   95.74    3.31 
   7  -1   0   87.87    3.32 
   7  -1   0   98.01    3.29 
  -7   1   0   96.80    3.32 
  -7   1   0   99.88    3.32 
  -7   1   0   97.02    3.32 
   6  -1   0  238.89    8.37 
   6  -1   0  237.86    8.34 
   6  -1   0  248.03    8.34 
   6  -1   0  248.31    8.37 
   6  -1   0  229.17    8.34 
   6  -1   0  240.87    8.36 
  -6   1   0  245.91    8.36 
  -6   1   0  248.80    8.36 
  -6   1   0  244.83    8.36 
   5  -1   0  185.68    6.56 
   5  -1   0  191.20    6.55 
   5  -1   0  191.68    6.54 
   5  -1   0  180.07    6.57 
   5  -1   0  191.88    6.57 
   5  -1   0  195.62    6.56 
  -5   1   0  196.35    6.56 
  -5   1   0  192.77    6.56 
  -5   1   0  192.03    6.58 
  -5   1   0  185.03    6.56 
   4  -1   0   53.78    1.85 
   4  -1   0   51.80    1.84 
   4  -1   0   53.82    1.84 
   4  -1   0   54.48    1.87 
   4  -1   0   54.19    1.85 
   4  -1   0   52.31    1.84 
   4  -1   0   54.13    1.85 
  -4   1   0   53.52    1.87 
  -4   1   0   53.50    1.85 
  -4   1   0   49.57    1.85 
  -4   1   0   53.04    1.85 
   3  -1   0  268.25    9.29 
   3  -1   0  277.19    9.33 
   3  -1   0  270.46    9.31 
   3  -1   0  288.19    9.35 
   3  -1   0  271.16    9.33 
  -3   1   0  263.26    9.32 
  -3   1   0  247.79    9.34 
  -3   1   0  287.31    9.31 
  -3   1   0  262.62    9.33 
  -3   1   0  268.42    9.34 
   2  -1   0   89.99    3.22 
   2  -1   0   94.54    3.23 
   2  -1   0   90.82    3.24 
   2  -1   0   93.61    3.24 
   2  -1   0   95.31    3.23 
  -2   1   0   98.69    3.23 
  -2   1   0   92.97    3.24 
  -2   1   0   89.72    3.23 
  -2   1   0   93.80    3.23 
  -2   1   0   97.88    3.23 
   1  -1   0  109.43    3.72 
   1  -1   0  113.44    3.72 
   1  -1   0  107.82    3.71 
   1  -1   0  108.97    3.72 
   1  -1   0  105.79    3.75 
  -1   1   0  110.20    3.72 
  -1   1   0  108.24    3.71 
  -1   1   0   95.01    3.72 
  -1   1   0  108.28    3.72 
  -1   1   0  111.27    3.73 
   0  -1   0   10.84    0.37 
   0  -1   0    9.62    0.36 
   0   1   0   10.62    0.36 
   0   1   0   10.03    0.36 
   0   1   0   10.10    0.37 
   0   1   0   10.81    0.37 
   0   1   0   10.81    0.37 
  -1  -1   0   27.29    0.97 
  -1  -1   0   25.29    0.98 
  -1  -1   0   29.19    0.98 
   1   1   0   25.46    0.97 
   1   1   0   28.82    0.98 
   1   1   0   29.07    0.97 
   1   1   0   29.24    0.98 
   1   1   0   29.10    0.98 
   1   1   0   28.98    0.99 
  -2  -1   0  286.26    9.55 
  -2  -1   0  265.51    9.51 
   2   1   0  276.16    9.53 
   2   1   0  281.51    9.51 
   2   1   0  277.89    9.59 
   2   1   0  253.47    9.49 
   2   1   0  287.64    9.52 
   2   1   0  273.31    9.51 
  -3  -1   0   39.16    1.34 
  -3  -1   0   38.11    1.34 
  -3  -1   0   37.69    1.34 
  -3  -1   0   38.06    1.34 
   3   1   0   38.22    1.34 
   3   1   0   35.74    1.34 
   3   1   0   40.07    1.36 
   3   1   0   39.05    1.34 
   3   1   0   38.33    1.34 
   3   1   0   38.31    1.34 
  -4  -1   0   21.50    0.82 
  -4  -1   0   21.39    0.80 
  -4  -1   0   21.67    0.80 
  -4  -1   0   22.43    0.80 
   4   1   0   22.24    0.81 
   4   1   0   23.89    0.80 
   4   1   0   22.49    0.79 
   4   1   0   22.56    0.80 
   4   1   0   22.37    0.82 
  -5  -1   0   12.23    0.46 
  -5  -1   0   11.32    0.45 
  -5  -1   0   11.79    0.45 
  -5  -1   0   11.71    0.47 
   5   1   0   11.62    0.48 
   5   1   0   11.89    0.45 
   5   1   0   11.95    0.46 
   5   1   0   11.77    0.44 
   5   1   0   11.97    0.45 
  -6  -1   0    8.48    0.37 
  -6  -1   0    8.98    0.37 
  -6  -1   0    9.16    0.37 
   6   1   0    8.88    0.40 
   6   1   0    8.98    0.36 
   6   1   0    8.96    0.38 
   6   1   0    9.24    0.37 
   6   1   0    9.32    0.35 
  -7  -1   0   44.59    1.57 
  -7  -1   0   44.62    1.57 
   7   1   0   42.12    1.56 
   7   1   0   43.88    1.58 
   7   1   0   43.23    1.54 
   7   1   0   42.70    1.55 
   7   1   0   45.35    1.60 
  -8  -1   0    1.19    0.14 
  -8  -1   0    1.41    0.15 
   8   1   0    1.13    0.14 
   8   1   0    1.46    0.12 
   8   1   0    1.57    0.12 
   8   1   0    1.06    0.16 
   8   1   0    1.24    0.17 
  -9  -1   0    0.36    0.09 
   9   1   0    0.12    0.06 
   9   1   0    0.21    0.06 
   9   1   0    0.25    0.10 
   9   1   0    0.16    0.10 
 -10  -1   0   38.01    1.45 
  10   1   0   38.76    1.39 
  10   1   0   38.92    1.39 
  10   1   0   39.15    1.46 
  10   1   0   40.92    1.49 
 -11  -1   0   21.53    0.85 
  11   1   0   21.07    0.76 
  11   1   0   20.64    0.87 
  11   1   0   21.03    0.86 
 -12  -1   0    4.05    0.29 
  12   1   0    4.34    0.33 
  12   1   0    4.24    0.32 
 -13  -1   0   48.12    1.81 
  13   1   0   47.40    1.84 
  13   1   0   49.86    1.83 
 -15   2   0    2.49    0.26 
  14  -2   0   15.40    0.71 
 -14   2   0   14.97    0.67 
  13  -2   0   16.12    0.72 
  13  -2   0   16.52    0.71 
 -13   2   0   16.20    0.69 
  12  -2   0    1.85    0.24 
  12  -2   0    2.03    0.21 
 -12   2   0    2.18    0.21 
  11  -2   0    3.44    0.25 
  11  -2   0    3.88    0.28 
 -11   2   0    3.88    0.24 
  10  -2   0    9.19    0.35 
  10  -2   0    9.84    0.43 
  10  -2   0    9.75    0.36 
  10  -2   0    8.85    0.45 
 -10   2   0    9.33    0.42 
   9  -2   0   29.07    1.02 
   9  -2   0   28.90    1.03 
   9  -2   0   29.27    1.08 
   9  -2   0   28.64    1.09 
   9  -2   0   30.86    1.06 
  -9   2   0   26.69    1.11 
  -9   2   0   29.59    1.08 
  -9   2   0   29.45    1.08 
   8  -2   0  134.36    4.71 
   8  -2   0  133.07    4.70 
   8  -2   0  135.96    4.67 
   8  -2   0  132.42    4.67 
   8  -2   0  136.52    4.73 
  -8   2   0  134.54    4.71 
  -8   2   0  137.22    4.71 
  -8   2   0  139.75    4.71 
   7  -2   0   24.58    0.87 
   7  -2   0   24.37    0.85 
   7  -2   0   24.50    0.90 
   7  -2   0   23.14    0.85 
   7  -2   0   24.41    0.89 
  -7   2   0   24.98    0.88 
  -7   2   0   24.26    0.88 
  -7   2   0   22.84    0.88 
   6  -2   0   13.66    0.51 
   6  -2   0   14.72    0.54 
   6  -2   0   14.46    0.57 
   6  -2   0   14.68    0.52 
   6  -2   0   14.27    0.53 
  -6   2   0   14.79    0.54 
  -6   2   0   13.99    0.54 
  -6   2   0   14.21    0.54 
   5  -2   0   23.30    0.85 
   5  -2   0   24.59    0.85 
   5  -2   0   23.59    0.84 
   5  -2   0   23.29    0.83 
  -5   2   0   23.49    0.85 
  -5   2   0   23.69    0.88 
  -5   2   0   23.42    0.85 
  -5   2   0   24.14    0.84 
  -5   2   0   24.88    0.86 
   4  -2   0   11.97    0.44 
   4  -2   0   11.56    0.44 
   4  -2   0   11.92    0.43 
   4  -2   0   12.24    0.43 
  -4   2   0   12.65    0.45 
  -4   2   0   12.48    0.45 
  -4   2   0   12.32    0.45 
  -4   2   0   12.50    0.47 
  -4   2   0   11.55    0.44 
   3  -2   0  244.68    8.21 
   3  -2   0  236.83    8.22 
   3  -2   0  215.93    8.22 
   3  -2   0  237.59    8.24 
   3  -2   0  245.54    8.23 
  -3   2   0  232.15    8.23 
  -3   2   0  240.00    8.24 
  -3   2   0  254.15    8.27 
  -3   2   0  242.93    8.25 
   2  -2   0   15.83    0.53 
   2  -2   0   14.21    0.52 
   2  -2   0   14.62    0.51 
   2  -2   0   14.63    0.51 
   2  -2   0   13.91    0.51 
  -2   2   0   14.69    0.51 
  -2   2   0   14.39    0.51 
  -2   2   0   14.19    0.53 
  -2   2   0   14.08    0.51 
  -2   2   0   14.26    0.52 
   1  -2   0   59.78    2.09 
   1  -2   0   60.79    2.09 
   1  -2   0   60.88    2.09 
   1  -2   0   57.64    2.09 
   1  -2   0   55.82    2.08 
   1  -2   0   63.15    2.09 
  -1   2   0   60.74    2.09 
  -1   2   0   61.31    2.09 
  -1   2   0   59.38    2.08 
  -1   2   0   60.53    2.09 
  -1   2   0   62.02    2.09 
  -1   2   0   63.46    2.09 
   0  -2   0  110.43    4.09 
   0  -2   0  119.62    4.06 
   0  -2   0  101.56    4.06 
   0  -2   0  118.81    4.07 
   0  -2   0  122.73    4.07 
   0   2   0  125.38    4.09 
   0   2   0  125.93    4.08 
   0   2   0  119.42    4.10 
   0   2   0  120.10    4.06 
   0   2   0  115.61    4.10 
  -1  -2   0    0.53    0.06 
  -1  -2   0    0.47    0.05 
   1   2   0    0.62    0.09 
   1   2   0    0.63    0.06 
   1   2   0    0.43    0.05 
   1   2   0    0.57    0.07 
   1   2   0    0.42    0.07 
   1   2   0    0.46    0.06 
  -2  -2   0   80.77    3.12 
  -2  -2   0   89.28    3.12 
  -2  -2   0   86.31    3.11 
   2   2   0   93.41    3.12 
   2   2   0   93.33    3.11 
   2   2   0   87.88    3.13 
   2   2   0   90.13    3.11 
   2   2   0   92.18    3.12 
   2   2   0   97.73    3.12 
  -3  -2   0   76.40    2.59 
  -3  -2   0   79.76    2.59 
   3   2   0   74.88    2.59 
   3   2   0   73.24    2.58 
   3   2   0   76.82    2.59 
   3   2   0   69.47    2.60 
   3   2   0   74.59    2.58 
   3   2   0   69.97    2.59 
  -4  -2   0   32.71    1.15 
   4   2   0   32.26    1.15 
   4   2   0   29.42    1.13 
   4   2   0   32.30    1.15 
   4   2   0   32.28    1.14 
   4   2   0   33.76    1.17 
  -5  -2   0    1.35    0.11 
  -5  -2   0    1.60    0.12 
  -5  -2   0    1.37    0.12 
   5   2   0    1.38    0.12 
   5   2   0    1.42    0.11 
   5   2   0    1.23    0.10 
   5   2   0    1.50    0.15 
   5   2   0    1.28    0.11 
  -6  -2   0    0.72    0.10 
  -6  -2   0    0.68    0.11 
   6   2   0    0.83    0.10 
   6   2   0    0.64    0.11 
   6   2   0    0.65    0.10 
   6   2   0    0.54    0.10 
   6   2   0    0.64    0.09 
  -7  -2   0   30.28    1.15 
  -7  -2   0   31.24    1.15 
   7   2   0   32.35    1.14 
   7   2   0   30.65    1.12 
   7   2   0   31.20    1.15 
   7   2   0   31.74    1.18 
   7   2   0   31.25    1.13 
  -8  -2   0    6.30    0.31 
  -8  -2   0    6.88    0.32 
   8   2   0    6.42    0.35 
   8   2   0    6.28    0.32 
   8   2   0    5.54    0.30 
   8   2   0    6.28    0.28 
   8   2   0    6.14    0.28 
  -9  -2   0   34.28    1.28 
   9   2   0   34.31    1.24 
   9   2   0   33.08    1.23 
   9   2   0   34.88    1.32 
   9   2   0   35.36    1.29 
 -10  -2   0   13.25    0.59 
  10   2   0   13.42    0.60 
  10   2   0   13.72    0.53 
  10   2   0   14.15    0.53 
  10   2   0   14.14    0.63 
 -11  -2   0   13.55    0.59 
  11   2   0   13.02    0.50 
  11   2   0   12.97    0.62 
  11   2   0   12.86    0.59 
 -12  -2   0    0.71    0.15 
  12   2   0    0.59    0.15 
  12   2   0    0.67    0.17 
  13   2   0    0.31    0.16 
  13   2   0    0.24    0.14 
  15  -3   0    5.30    0.56 
 -15   3   0    5.38    0.35 
  14  -3   0    1.11    0.21 
 -14   3   0    1.77    0.22 
  13  -3   0    0.34    0.15 
 -13   3   0    0.17    0.10 
  12  -3   0   10.09    0.44 
  12  -3   0    9.11    0.48 
 -12   3   0    9.70    0.45 
  11  -3   0    1.98    0.22 
  11  -3   0    1.76    0.17 
 -11   3   0    2.21    0.19 
  10  -3   0   93.07    3.36 
  10  -3   0   98.55    3.40 
 -10   3   0   95.99    3.37 
   9  -3   0    7.00    0.27 
   9  -3   0    6.95    0.35 
   9  -3   0    7.61    0.31 
   9  -3   0    6.88    0.32 
  -9   3   0    7.26    0.33 
  -9   3   0    6.73    0.32 
  -9   3   0    7.61    0.33 
   8  -3   0    1.37    0.08 
   8  -3   0    1.78    0.13 
   8  -3   0    1.28    0.12 
   8  -3   0    1.48    0.08 
  -8   3   0    1.43    0.12 
  -8   3   0    1.26    0.13 
  -8   3   0    1.25    0.12 
   7  -3   0    2.42    0.19 
   7  -3   0    2.22    0.11 
   7  -3   0    2.61    0.14 
   7  -3   0    2.49    0.14 
   7  -3   0    2.40    0.11 
  -7   3   0    2.72    0.15 
  -7   3   0    2.49    0.15 
  -7   3   0    2.47    0.15 
  -7   3   0    2.56    0.14 
   6  -3   0   36.80    1.26 
   6  -3   0   37.26    1.28 
   6  -3   0   36.32    1.26 
   6  -3   0   35.02    1.31 
   6  -3   0   35.87    1.28 
   6  -3   0   36.41    1.27 
  -6   3   0   34.79    1.27 
  -6   3   0   36.13    1.28 
  -6   3   0   35.49    1.28 
  -6   3   0   36.49    1.28 
   5  -3   0   14.80    0.57 
   5  -3   0   15.85    0.55 
   5  -3   0   16.50    0.61 
   5  -3   0   15.56    0.55 
   5  -3   0   16.09    0.57 
   5  -3   0   15.97    0.56 
  -5   3   0   16.01    0.60 
  -5   3   0   15.63    0.57 
  -5   3   0   15.39    0.57 
  -5   3   0   14.63    0.56 
  -5   3   0   14.95    0.57 
   4  -3   0  145.11    5.13 
   4  -3   0  147.53    5.11 
   4  -3   0  152.10    5.15 
   4  -3   0  149.31    5.13 
  -4   3   0  150.61    5.13 
  -4   3   0  146.13    5.13 
  -4   3   0  149.36    5.15 
  -4   3   0  149.84    5.12 
   3  -3   0    0.63    0.06 
   3  -3   0    0.57    0.04 
   3  -3   0    0.56    0.06 
   3  -3   0    0.47    0.05 
   3  -3   0    0.69    0.08 
  -3   3   0    0.53    0.05 
  -3   3   0    0.59    0.07 
  -3   3   0    0.47    0.06 
  -3   3   0    0.64    0.06 
  -3   3   0    0.54    0.06 
   2  -3   0   15.97    0.57 
   2  -3   0   16.07    0.59 
   2  -3   0   15.38    0.57 
   2  -3   0   15.63    0.58 
   2  -3   0   17.25    0.58 
   2  -3   0   16.24    0.58 
  -2   3   0   17.87    0.59 
  -2   3   0   15.93    0.57 
  -2   3   0   15.92    0.58 
  -2   3   0   16.09    0.58 
  -2   3   0   16.13    0.58 
  -2   3   0   15.69    0.57 
   1  -3   0  491.87   16.26 
   1  -3   0  478.99   16.20 
   1  -3   0  489.02   16.18 
   1  -3   0  423.44   16.22 
   1  -3   0  481.32   16.23 
  -1   3   0  491.02   16.25 
  -1   3   0  468.90   16.20 
  -1   3   0  412.94   16.21 
  -1   3   0  503.39   16.24 
  -1   3   0  446.44   16.21 
  -1   3   0  481.45   16.24 
   0  -3   0   97.04    3.16 
   0  -3   0   95.17    3.16 
   0  -3   0   98.38    3.16 
   0  -3   0   88.92    3.15 
   0   3   0   82.89    3.15 
   0   3   0   81.91    3.16 
   0   3   0   94.00    3.16 
   0   3   0   91.49    3.16 
  -1  -3   0   11.09    0.42 
  -1  -3   0   10.87    0.43 
  -1  -3   0   13.45    0.43 
  -1  -3   0   11.35    0.42 
  -1  -3   0   11.53    0.43 
   1   3   0   10.84    0.43 
   1   3   0   11.68    0.43 
   1   3   0   10.87    0.43 
   1   3   0   12.41    0.43 
   1   3   0   12.06    0.43 
   1   3   0   10.58    0.44 
  -2  -3   0   14.64    0.55 
  -2  -3   0   15.81    0.56 
  -2  -3   0   14.52    0.55 
  -2  -3   0   14.57    0.56 
   2   3   0   16.08    0.58 
   2   3   0   14.74    0.55 
   2   3   0   14.72    0.56 
   2   3   0   14.97    0.56 
   2   3   0   14.92    0.56 
   2   3   0   16.13    0.56 
   2   3   0   14.77    0.55 
  -3  -3   0    3.04    0.17 
  -3  -3   0    3.41    0.16 
  -3  -3   0    3.43    0.16 
   3   3   0    3.27    0.16 
   3   3   0    3.53    0.17 
   3   3   0    2.99    0.19 
   3   3   0    3.51    0.16 
   3   3   0    3.48    0.17 
  -4  -3   0    1.12    0.11 
  -4  -3   0    0.76    0.09 
   4   3   0    1.25    0.11 
   4   3   0    1.34    0.10 
   4   3   0    1.16    0.14 
   4   3   0    0.91    0.10 
   4   3   0    1.25    0.10 
  -5  -3   0    4.01    0.20 
   5   3   0    4.11    0.24 
   5   3   0    3.49    0.19 
   5   3   0    3.91    0.20 
   5   3   0    3.60    0.20 
   5   3   0    3.85    0.19 
  -6  -3   0   20.35    0.76 
   6   3   0   19.54    0.73 
   6   3   0   20.02    0.75 
   6   3   0   19.83    0.75 
   6   3   0   19.09    0.74 
   6   3   0   20.35    0.79 
  -7  -3   0    9.46    0.44 
   7   3   0   10.46    0.44 
   7   3   0    9.60    0.43 
   7   3   0   10.22    0.41 
   7   3   0   10.83    0.42 
   7   3   0   10.38    0.49 
  -8  -3   0   21.56    0.88 
   8   3   0   22.56    0.85 
   8   3   0   22.79    0.84 
   8   3   0   24.51    0.93 
   8   3   0   22.91    0.88 
   9   3   0    1.35    0.19 
   9   3   0    0.75    0.13 
   9   3   0    0.81    0.15 
   9   3   0    0.85    0.13 
  10   3   0   19.46    0.72 
  10   3   0   19.53    0.83 
  10   3   0   19.01    0.79 
  11   3   0   17.50    0.73 
  11   3   0   16.79    0.63 
  11   3   0   16.18    0.75 
  12   3   0    8.96    0.51 
  12   3   0    8.33    0.47 
  15  -4   0   -0.11    0.17 
 -15   4   0   -0.02    0.10 
  14  -4   0    0.48    0.17 
 -14   4   0    0.74    0.14 
  13  -4   0    1.13    0.18 
 -13   4   0    0.92    0.14 
  12  -4   0    1.27    0.22 
 -12   4   0    0.90    0.13 
  11  -4   0    0.15    0.12 
  11  -4   0    0.24    0.07 
 -11   4   0   -0.01    0.08 
  10  -4   0   12.52    0.56 
  10  -4   0   13.01    0.52 
 -10   4   0   13.73    0.54 
   9  -4   0    0.35    0.07 
   9  -4   0    0.08    0.07 
   9  -4   0    0.14    0.06 
  -9   4   0    0.09    0.06 
  -9   4   0   -0.05    0.05 
  -9   4   0    0.08    0.06 
   8  -4   0   30.14    1.11 
   8  -4   0   30.29    1.10 
   8  -4   0   29.85    1.06 
   8  -4   0   30.37    1.06 
   8  -4   0   32.92    1.09 
  -8   4   0   29.76    1.11 
  -8   4   0   30.50    1.09 
  -8   4   0   30.12    1.11 
  -8   4   0   30.28    1.11 
   7  -4   0   15.62    0.55 
   7  -4   0   16.29    0.57 
   7  -4   0   15.47    0.63 
   7  -4   0   14.76    0.58 
   7  -4   0   15.62    0.56 
   7  -4   0   15.58    0.59 
  -7   4   0   16.18    0.59 
  -7   4   0   15.99    0.58 
  -7   4   0   15.22    0.59 
  -7   4   0   15.64    0.59 
   6  -4   0   21.89    0.72 
   6  -4   0   20.88    0.79 
   6  -4   0   20.35    0.72 
   6  -4   0   20.85    0.72 
   6  -4   0   20.05    0.74 
   6  -4   0   19.66    0.75 
  -6   4   0   20.83    0.75 
  -6   4   0   19.83    0.74 
  -6   4   0   20.69    0.75 
  -6   4   0   20.24    0.75 
   5  -4   0    0.47    0.07 
   5  -4   0    0.52    0.05 
   5  -4   0    0.39    0.05 
   5  -4   0    0.39    0.06 
   5  -4   0    0.54    0.09 
  -5   4   0    0.44    0.08 
  -5   4   0    0.48    0.06 
  -5   4   0    0.46    0.08 
  -5   4   0    0.47    0.07 
   4  -4   0   24.99    0.87 
   4  -4   0   24.82    0.88 
   4  -4   0   26.20    0.91 
   4  -4   0   24.92    0.89 
  -4   4   0   23.88    0.91 
  -4   4   0   24.88    0.89 
  -4   4   0   25.27    0.89 
  -4   4   0   25.11    0.88 
  -4   4   0   23.82    0.89 
   3  -4   0   32.02    1.13 
   3  -4   0   32.93    1.14 
   3  -4   0   32.44    1.16 
   3  -4   0   32.96    1.15 
  -3   4   0   31.28    1.14 
  -3   4   0   33.11    1.16 
  -3   4   0   32.19    1.14 
  -3   4   0   32.27    1.13 
  -3   4   0   32.35    1.15 
  -3   4   0   33.17    1.15 
   2  -4   0  213.87    6.80 
   2  -4   0  193.60    6.71 
   2  -4   0  179.37    6.71 
   2  -4   0  196.34    6.72 
   2  -4   0  197.34    6.71 
  -2   4   0  188.56    6.72 
  -2   4   0  198.96    6.72 
  -2   4   0  186.81    6.71 
  -2   4   0  200.67    6.72 
  -2   4   0  194.22    6.71 
  -2   4   0  194.86    6.71 
   1  -4   0  106.61    3.65 
   1  -4   0  105.03    3.65 
   1  -4   0  106.67    3.65 
   1  -4   0  105.62    3.65 
  -1   4   0  106.19    3.66 
  -1   4   0   97.58    3.65 
  -1   4   0  109.68    3.66 
  -1   4   0  111.15    3.65 
  -1   4   0  109.20    3.65 
  -1   4   0   97.98    3.65 
   0  -4   0   37.79    1.30 
   0  -4   0   33.66    1.29 
   0  -4   0   36.50    1.30 
   0  -4   0   37.20    1.31 
   0   4   0   38.29    1.31 
   0   4   0   34.56    1.30 
   0   4   0   39.32    1.30 
   0   4   0   37.97    1.31 
   0   4   0   37.15    1.31 
  -1  -4   0   12.98    0.48 
  -1  -4   0   12.43    0.49 
  -1  -4   0   13.00    0.46 
  -1  -4   0   11.79    0.47 
   1   4   0   13.31    0.50 
   1   4   0   12.09    0.47 
   1   4   0   13.11    0.48 
   1   4   0   12.72    0.48 
   1   4   0   12.38    0.48 
   1   4   0   12.17    0.48 
  -2  -4   0   18.17    0.68 
  -2  -4   0   18.98    0.69 
  -2  -4   0   18.12    0.69 
  -2  -4   0   19.68    0.70 
   2   4   0   19.08    0.69 
   2   4   0   18.58    0.69 
   2   4   0   17.99    0.70 
   2   4   0   19.31    0.70 
  -3  -4   0  232.19    7.76 
  -3  -4   0  226.21    7.74 
  -3  -4   0  223.25    7.76 
   3   4   0  213.28    7.75 
   3   4   0  228.59    7.75 
   3   4   0  222.94    7.76 
   3   4   0  229.64    7.74 
   3   4   0  220.40    7.78 
   3   4   0  224.61    7.74 
  -4  -4   0    0.33    0.06 
  -4  -4   0    0.37    0.07 
  -4  -4   0    0.32    0.06 
   4   4   0    0.35    0.09 
   4   4   0    0.31    0.07 
   4   4   0    0.27    0.06 
   4   4   0    0.39    0.07 
   4   4   0    0.74    0.09 
   4   4   0    0.37    0.07 
  -5  -4   0   41.98    1.72 
  -5  -4   0   50.48    1.73 
   5   4   0   45.80    1.72 
   5   4   0   47.28    1.72 
   5   4   0   52.03    1.71 
   5   4   0   50.38    1.72 
   5   4   0   49.81    1.77 
  -6  -4   0    2.19    0.18 
  -6  -4   0    2.59    0.19 
   6   4   0    2.47    0.22 
   6   4   0    2.64    0.18 
   6   4   0    2.71    0.17 
   6   4   0    2.56    0.18 
   6   4   0    2.30    0.17 
  -7  -4   0    2.78    0.21 
  -7  -4   0    2.57    0.20 
   7   4   0    2.60    0.18 
   7   4   0    2.82    0.18 
   7   4   0    2.85    0.25 
   7   4   0    2.48    0.20 
   7   4   0    2.44    0.20 
  -8  -4   0   25.06    0.98 
   8   4   0   26.40    0.94 
   8   4   0   25.51    0.95 
   8   4   0   24.57    0.97 
   8   4   0   25.46    1.03 
  -9  -4   0  102.05    3.49 
   9   4   0   97.00    3.43 
   9   4   0   99.50    3.48 
   9   4   0   94.23    3.52 
 -10  -4   0   64.85    2.30 
  10   4   0   62.08    2.28 
  10   4   0   60.16    2.22 
  10   4   0   65.12    2.34 
  11   4   0   -0.05    0.13 
  11   4   0    0.02    0.13 
  11   4   0    0.05    0.07 
  15  -5   0    0.00    0.16 
 -15   5   0    0.09    0.12 
  14  -5   0    2.67    0.32 
 -14   5   0    3.60    0.27 
  13  -5   0    0.39    0.14 
 -13   5   0    0.29    0.11 
  12  -5   0    3.92    0.29 
 -12   5   0    3.69    0.25 
  11  -5   0    7.18    0.31 
  11  -5   0    7.15    0.38 
 -11   5   0    7.18    0.35 
  10  -5   0    5.14    0.22 
 -10   5   0    4.59    0.26 
   9  -5   0   51.25    1.86 
   9  -5   0   48.78    1.78 
   9  -5   0   51.81    1.76 
   9  -5   0   50.60    1.81 
  -9   5   0   49.06    1.80 
  -9   5   0   48.24    1.78 
  -9   5   0   52.19    1.80 
  -9   5   0   50.37    1.80 
   8  -5   0   83.50    2.81 
   8  -5   0   79.12    2.85 
   8  -5   0   78.68    2.83 
   8  -5   0   80.02    2.90 
  -8   5   0   81.03    2.85 
  -8   5   0   80.60    2.85 
  -8   5   0   86.03    2.85 
  -8   5   0   81.13    2.84 
   7  -5   0   78.56    2.75 
   7  -5   0   74.64    2.66 
   7  -5   0   76.29    2.66 
   7  -5   0   77.83    2.69 
   7  -5   0   75.09    2.70 
  -7   5   0   79.95    2.70 
  -7   5   0   78.12    2.70 
  -7   5   0   74.26    2.69 
  -7   5   0   79.77    2.70 
   6  -5   0    3.45    0.18 
   6  -5   0    3.44    0.17 
   6  -5   0    3.46    0.14 
   6  -5   0    3.38    0.14 
   6  -5   0    3.71    0.22 
  -6   5   0    3.29    0.18 
  -6   5   0    3.35    0.16 
  -6   5   0    3.53    0.18 
   5  -5   0   13.42    0.50 
   5  -5   0   13.54    0.53 
   5  -5   0   12.94    0.49 
   5  -5   0   13.16    0.47 
  -5   5   0   12.96    0.49 
  -5   5   0   12.66    0.50 
  -5   5   0   13.89    0.50 
  -5   5   0   13.28    0.50 
   4  -5   0    9.48    0.35 
   4  -5   0    9.40    0.37 
   4  -5   0    9.42    0.38 
   4  -5   0   10.97    0.41 
  -4   5   0    9.47    0.37 
  -4   5   0    9.44    0.39 
  -4   5   0    9.59    0.34 
  -4   5   0    9.52    0.37 
  -4   5   0    9.55    0.37 
  -4   5   0    9.52    0.38 
   3  -5   0  248.11    8.39 
   3  -5   0  247.71    8.41 
   3  -5   0  241.52    8.39 
   3  -5   0  242.36    8.39 
  -3   5   0  242.48    8.39 
  -3   5   0  249.36    8.39 
  -3   5   0  241.24    8.40 
  -3   5   0  243.45    8.40 
  -3   5   0  236.13    8.39 
  -3   5   0  244.18    8.40 
   2  -5   0  108.51    3.76 
   2  -5   0  106.73    3.75 
   2  -5   0  112.52    3.76 
  -2   5   0  109.35    3.76 
  -2   5   0  102.11    3.75 
  -2   5   0  108.91    3.76 
  -2   5   0  108.00    3.75 
  -2   5   0  107.93    3.76 
  -2   5   0  112.26    3.76 
   1  -5   0    6.12    0.25 
   1  -5   0    6.19    0.26 
   1  -5   0    5.97    0.25 
  -1   5   0    5.70    0.25 
  -1   5   0    6.15    0.26 
  -1   5   0    5.68    0.26 
  -1   5   0    5.86    0.25 
  -1   5   0    6.23    0.25 
  -1   5   0    5.94    0.25 
   0  -5   0   69.66    2.42 
   0  -5   0   69.64    2.41 
   0   5   0   63.88    2.41 
   0   5   0   67.74    2.43 
   0   5   0   75.63    2.43 
   0   5   0   70.24    2.43 
   0   5   0   68.66    2.42 
   0   5   0   68.37    2.41 
  -1  -5   0   93.26    3.37 
  -1  -5   0  100.03    3.39 
  -1  -5   0  101.24    3.37 
   1   5   0   93.53    3.37 
   1   5   0   87.17    3.38 
   1   5   0  101.86    3.41 
   1   5   0   98.37    3.39 
   1   5   0  102.63    3.39 
  -2  -5   0   11.05    0.42 
  -2  -5   0    9.52    0.40 
  -2  -5   0   10.52    0.39 
   2   5   0    9.75    0.40 
   2   5   0    9.76    0.42 
   2   5   0   11.09    0.42 
   2   5   0   10.59    0.42 
  -3  -5   0   18.54    0.72 
  -3  -5   0   19.12    0.73 
  -3  -5   0   19.54    0.73 
  -3  -5   0   19.72    0.71 
   3   5   0   20.28    0.74 
   3   5   0   20.16    0.77 
   3   5   0   19.14    0.72 
   3   5   0   19.02    0.73 
   3   5   0   19.13    0.74 
  -4  -5   0    5.44    0.25 
  -4  -5   0    5.34    0.27 
  -4  -5   0    5.32    0.27 
   4   5   0    5.80    0.28 
   4   5   0    5.22    0.30 
   4   5   0    5.53    0.27 
   4   5   0    5.82    0.27 
   4   5   0    5.77    0.26 
   4   5   0    5.34    0.25 
  -5  -5   0    8.08    0.35 
  -5  -5   0    7.03    0.34 
   5   5   0    7.45    0.34 
   5   5   0    7.53    0.32 
   5   5   0    7.14    0.38 
   5   5   0    7.19    0.35 
   5   5   0    7.22    0.32 
   5   5   0    6.72    0.33 
  -6  -5   0   21.54    0.81 
  -6  -5   0   20.10    0.81 
   6   5   0   21.97    0.78 
   6   5   0   20.30    0.79 
   6   5   0   20.67    0.80 
   6   5   0   18.75    0.84 
   6   5   0   20.70    0.79 
   6   5   0   21.26    0.82 
  -7  -5   0    5.13    0.28 
  -7  -5   0    4.60    0.27 
   7   5   0    3.96    0.24 
   7   5   0    4.16    0.29 
   7   5   0    4.19    0.31 
   7   5   0    4.53    0.26 
   7   5   0    4.58    0.25 
  -8  -5   0    5.94    0.33 
   8   5   0    5.74    0.34 
   8   5   0    5.78    0.31 
   8   5   0    5.58    0.28 
   8   5   0    5.60    0.37 
  -9  -5   0    0.34    0.11 
   9   5   0    0.47    0.10 
   9   5   0    0.61    0.15 
   9   5   0    0.40    0.12 
   9   5   0    0.60    0.15 
  10   5   0    0.59    0.16 
  10   5   0    1.23    0.21 
  10   5   0    1.27    0.19 
  10   5   0    0.89    0.15 
  11   5   0    1.22    0.15 
  11   5   0    0.78    0.19 
  15  -6   0    8.49    0.51 
 -15   6   0    8.82    0.46 
  14  -6   0   18.83    0.84 
 -14   6   0   19.60    0.80 
  13  -6   0    1.12    0.19 
 -13   6   0    1.24    0.19 
  12  -6   0   17.39    0.75 
 -12   6   0   18.11    0.72 
 -11   6   0   33.96    1.25 
 -11   6   0   34.54    1.27 
  10  -6   0   16.84    0.73 
 -10   6   0   16.63    0.64 
 -10   6   0   16.64    0.66 
   9  -6   0   30.99    1.12 
   9  -6   0   32.18    1.20 
  -9   6   0   30.86    1.14 
  -9   6   0   30.92    1.14 
  -9   6   0   30.38    1.15 
  -9   6   0   31.31    1.13 
   8  -6   0   45.46    1.56 
   8  -6   0   44.19    1.63 
   8  -6   0   43.46    1.58 
  -8   6   0   44.56    1.57 
  -8   6   0   44.76    1.58 
  -8   6   0   43.89    1.56 
  -8   6   0   41.35    1.57 
   7  -6   0    2.94    0.17 
   7  -6   0    3.12    0.22 
   7  -6   0    2.81    0.16 
  -7   6   0    2.95    0.18 
  -7   6   0    2.85    0.16 
  -7   6   0    2.82    0.17 
  -7   6   0    2.68    0.17 
   6  -6   0   24.97    0.86 
   6  -6   0   24.49    0.88 
   6  -6   0   25.00    0.93 
   6  -6   0   24.49    0.89 
  -6   6   0   25.22    0.89 
  -6   6   0   23.23    0.89 
  -6   6   0   23.43    0.88 
  -6   6   0   24.06    0.89 
   5  -6   0   67.39    2.44 
   5  -6   0   71.34    2.42 
   5  -6   0   69.46    2.45 
   5  -6   0   67.06    2.47 
  -5   6   0   70.62    2.45 
  -5   6   0   72.06    2.45 
  -5   6   0   71.76    2.44 
  -5   6   0   69.70    2.45 
   4  -6   0   50.31    1.70 
   4  -6   0   49.14    1.69 
   4  -6   0   47.17    1.68 
   4  -6   0   45.89    1.66 
  -4   6   0   48.73    1.67 
  -4   6   0   48.18    1.68 
  -4   6   0   47.39    1.68 
  -4   6   0   48.41    1.66 
  -4   6   0   41.05    1.69 
  -4   6   0   50.14    1.68 
   3  -6   0    0.32    0.05 
   3  -6   0    0.39    0.06 
   3  -6   0    0.37    0.06 
   3  -6   0    0.45    0.08 
  -3   6   0    0.57    0.07 
  -3   6   0    0.44    0.07 
  -3   6   0    0.42    0.07 
  -3   6   0    0.40    0.08 
  -3   6   0    0.79    0.10 
  -3   6   0    0.36    0.06 
   2  -6   0   61.89    2.25 
   2  -6   0   63.79    2.25 
   2  -6   0   64.66    2.25 
  -2   6   0   65.74    2.25 
  -2   6   0   59.26    2.25 
  -2   6   0   64.14    2.24 
  -2   6   0   65.53    2.25 
  -2   6   0   66.56    2.26 
  -2   6   0   66.15    2.25 
   1  -6   0    0.11    0.06 
   1  -6   0    0.10    0.05 
   1  -6   0    0.17    0.05 
  -1   6   0    0.19    0.06 
  -1   6   0    0.10    0.06 
  -1   6   0    0.46    0.07 
  -1   6   0    0.11    0.05 
  -1   6   0    0.12    0.05 
  -1   6   0    0.12    0.05 
   0  -6   0  105.40    4.07 
   0  -6   0  122.88    4.08 
   0   6   0  119.59    4.09 
   0   6   0  116.94    4.07 
   0   6   0  112.21    4.08 
   0   6   0  118.61    4.07 
   0   6   0  126.12    4.10 
  -1  -6   0   38.95    1.36 
  -1  -6   0   37.70    1.38 
  -1  -6   0   35.70    1.37 
   1   6   0   38.41    1.39 
   1   6   0   40.77    1.41 
   1   6   0   41.93    1.40 
   1   6   0   37.38    1.37 
   1   6   0   38.01    1.39 
  -2  -6   0   33.03    1.15 
  -2  -6   0   31.36    1.12 
  -2  -6   0   33.82    1.13 
   2   6   0   29.00    1.14 
   2   6   0   30.67    1.15 
   2   6   0   30.71    1.13 
   2   6   0   30.65    1.14 
   2   6   0   30.97    1.17 
  -3  -6   0    1.55    0.14 
  -3  -6   0    1.24    0.13 
  -3  -6   0    1.36    0.11 
   3   6   0    1.52    0.18 
   3   6   0    1.28    0.14 
   3   6   0    1.39    0.13 
   3   6   0    1.37    0.14 
   3   6   0    1.58    0.16 
  -4  -6   0   22.60    0.80 
  -4  -6   0   20.94    0.79 
  -4  -6   0   21.26    0.80 
   4   6   0   19.38    0.78 
   4   6   0   21.25    0.81 
   4   6   0   17.89    0.82 
   4   6   0   20.76    0.79 
   4   6   0   21.39    0.80 
  -5  -6   0    2.36    0.19 
  -5  -6   0    2.13    0.18 
  -5  -6   0    1.91    0.17 
   5   6   0    1.84    0.16 
   5   6   0    1.88    0.21 
   5   6   0    2.32    0.23 
   5   6   0    2.03    0.17 
   5   6   0    1.86    0.18 
  -6  -6   0    9.60    0.44 
  -6  -6   0    9.24    0.43 
   6   6   0    9.40    0.48 
   6   6   0    8.80    0.40 
   6   6   0    9.26    0.45 
   6   6   0    9.25    0.43 
   6   6   0    9.30    0.41 
  -7  -6   0   21.20    0.87 
   7   6   0   22.78    0.92 
   7   6   0   21.62    0.85 
   7   6   0   22.97    0.83 
   7   6   0   21.26    0.88 
  -8  -6   0    2.23    0.23 
   8   6   0    2.82    0.20 
   8   6   0    2.67    0.26 
   8   6   0    2.32    0.22 
   8   6   0    2.26    0.27 
   9   6   0    1.80    0.26 
   9   6   0    1.36    0.25 
   9   6   0    1.63    0.17 
  10   6   0   20.64    0.78 
  10   6   0   19.89    1.03 
  15  -7   0    1.06    0.24 
 -15   7   0    0.93    0.16 
  14  -7   0    2.70    0.30 
 -14   7   0    2.46    0.25 
  13  -7   0    6.41    0.40 
 -13   7   0    6.72    0.36 
  12  -7   0    1.59    0.23 
 -12   7   0    1.57    0.19 
  11  -7   0   22.43    0.94 
 -11   7   0   22.39    0.85 
 -11   7   0   22.64    0.87 
  10  -7   0   64.70    2.40 
 -10   7   0   66.03    2.32 
 -10   7   0   66.43    2.34 
   9  -7   0    0.75    0.16 
  -9   7   0    0.55    0.09 
  -9   7   0    0.47    0.10 
   8  -7   0   57.29    2.07 
   8  -7   0   56.73    2.02 
   8  -7   0   55.09    2.00 
  -8   7   0   57.78    2.02 
  -8   7   0   56.88    2.02 
  -8   7   0   56.01    2.00 
  -8   7   0   57.39    2.02 
   7  -7   0   25.71    0.96 
   7  -7   0   23.68    0.91 
   7  -7   0   24.05    0.90 
  -7   7   0   24.85    0.91 
  -7   7   0   24.50    0.90 
  -7   7   0   24.79    0.91 
  -7   7   0   25.14    0.91 
   6  -7   0    3.54    0.22 
   6  -7   0    3.32    0.19 
   6  -7   0    3.30    0.14 
   6  -7   0    3.29    0.17 
  -6   7   0    3.40    0.19 
  -6   7   0    3.38    0.18 
  -6   7   0    3.28    0.18 
  -6   7   0    3.33    0.19 
   5  -7   0    6.47    0.31 
   5  -7   0    6.16    0.24 
   5  -7   0    5.96    0.27 
   5  -7   0    5.84    0.28 
  -5   7   0    6.09    0.26 
  -5   7   0    6.00    0.27 
  -5   7   0    6.49    0.28 
  -5   7   0    6.58    0.28 
  -5   7   0    6.02    0.24 
   4  -7   0    1.25    0.11 
   4  -7   0    1.32    0.08 
   4  -7   0    1.19    0.12 
   4  -7   0    1.35    0.13 
  -4   7   0    1.44    0.11 
  -4   7   0    1.67    0.13 
  -4   7   0    1.25    0.11 
  -4   7   0    1.34    0.10 
  -4   7   0    1.31    0.12 
  -4   7   0    1.13    0.13 
   3  -7   0    0.37    0.06 
   3  -7   0    0.41    0.06 
   3  -7   0    0.27    0.07 
   3  -7   0    0.41    0.07 
  -3   7   0    0.37    0.06 
  -3   7   0    0.45    0.08 
  -3   7   0    0.41    0.07 
  -3   7   0    0.35    0.07 
  -3   7   0    0.30    0.06 
  -3   7   0    0.28    0.06 
   2  -7   0   33.20    1.19 
   2  -7   0   33.68    1.20 
  -2   7   0   33.40    1.19 
  -2   7   0   32.87    1.20 
  -2   7   0   33.49    1.19 
  -2   7   0   32.38    1.19 
  -2   7   0   33.54    1.20 
  -2   7   0   32.02    1.19 
   1  -7   0   66.35    2.42 
   1  -7   0   68.96    2.43 
  -1   7   0   70.80    2.44 
  -1   7   0   70.07    2.43 
  -1   7   0   72.27    2.42 
  -1   7   0   64.07    2.41 
  -1   7   0   70.49    2.44 
   0  -7   0    9.71    0.40 
   0  -7   0    9.58    0.37 
   0  -7   0    8.68    0.38 
   0   7   0    8.83    0.41 
   0   7   0   10.39    0.39 
   0   7   0    9.61    0.40 
   0   7   0    9.74    0.41 
  -1  -7   0    1.65    0.12 
  -1  -7   0    1.53    0.11 
  -1  -7   0    1.27    0.14 
   1   7   0    1.43    0.16 
   1   7   0    1.26    0.14 
   1   7   0    1.65    0.14 
   1   7   0    1.43    0.17 
   1   7   0    1.36    0.13 
  -2  -7   0   16.37    0.64 
  -2  -7   0   15.88    0.62 
  -2  -7   0   16.58    0.66 
   2   7   0   16.28    0.67 
   2   7   0   17.02    0.65 
   2   7   0   17.35    0.66 
   2   7   0   17.68    0.70 
   2   7   0   17.48    0.66 
  -3  -7   0    1.20    0.14 
  -3  -7   0    1.03    0.13 
  -3  -7   0    1.06    0.12 
   3   7   0    0.92    0.13 
   3   7   0    0.72    0.13 
   3   7   0    1.07    0.15 
   3   7   0    1.18    0.14 
   3   7   0    1.06    0.17 
  -4  -7   0    0.18    0.08 
  -4  -7   0    0.25    0.09 
   4   7   0    0.32    0.11 
   4   7   0    0.05    0.07 
   4   7   0    0.19    0.09 
   4   7   0    0.04    0.07 
   4   7   0    0.22    0.10 
  -5  -7   0    1.21    0.16 
  -5  -7   0    1.36    0.17 
   5   7   0    1.20    0.17 
   5   7   0    1.43    0.20 
   5   7   0    1.64    0.22 
   5   7   0    1.32    0.16 
  -6  -7   0   23.25    0.91 
  -6  -7   0   23.21    0.92 
   6   7   0   23.74    0.96 
   6   7   0   23.63    0.88 
   6   7   0   22.98    0.94 
   7   7   0    0.61    0.15 
   7   7   0    0.51    0.14 
   7   7   0    0.76    0.11 
   8   7   0   15.70    0.73 
   8   7   0   16.25    0.63 
   8   7   0   14.85    0.70 
   9   7   0   17.50    0.69 
 -15   8   0    0.28    0.13 
  14  -8   0    4.60    0.35 
 -14   8   0    4.12    0.31 
  13  -8   0   11.93    0.59 
 -13   8   0   12.41    0.55 
 -12   8   0    5.47    0.33 
 -12   8   0    6.05    0.31 
  11  -8   0    1.40    0.25 
 -11   8   0    1.71    0.17 
 -11   8   0    1.44    0.19 
  10  -8   0   17.97    0.77 
 -10   8   0   17.57    0.68 
 -10   8   0   17.12    0.70 
   9  -8   0   58.64    2.13 
  -9   8   0   57.10    2.05 
  -9   8   0   58.09    2.07 
   8  -8   0   14.41    0.62 
  -8   8   0   14.01    0.56 
  -8   8   0   13.32    0.56 
  -8   8   0   14.18    0.55 
  -8   8   0   13.69    0.56 
   7  -8   0    3.89    0.22 
   7  -8   0    3.68    0.20 
   7  -8   0    3.78    0.26 
  -7   8   0    3.67    0.22 
  -7   8   0    3.65    0.20 
  -7   8   0    3.62    0.21 
  -7   8   0    3.96    0.22 
   6  -8   0    0.36    0.08 
   6  -8   0    0.30    0.10 
   6  -8   0    0.27    0.04 
   6  -8   0    0.26    0.06 
  -6   8   0    0.32    0.07 
  -6   8   0    0.32    0.07 
  -6   8   0    0.32    0.07 
  -6   8   0    0.22    0.08 
   5  -8   0    0.97    0.13 
   5  -8   0    0.97    0.15 
   5  -8   0    1.01    0.11 
   5  -8   0    1.10    0.08 
  -5   8   0    1.08    0.13 
  -5   8   0    0.98    0.12 
  -5   8   0    0.97    0.09 
  -5   8   0    0.97    0.12 
  -5   8   0    1.15    0.12 
   4  -8   0   37.31    1.40 
   4  -8   0   38.94    1.44 
   4  -8   0   41.69    1.45 
   4  -8   0   39.57    1.43 
  -4   8   0   40.53    1.43 
  -4   8   0   40.04    1.44 
  -4   8   0   40.09    1.44 
  -4   8   0   41.98    1.44 
  -4   8   0   39.04    1.41 
   3  -8   0   13.55    0.52 
   3  -8   0   13.56    0.53 
   3  -8   0   12.39    0.49 
  -3   8   0   13.57    0.53 
  -3   8   0   12.55    0.51 
  -3   8   0   13.28    0.51 
  -3   8   0   12.73    0.53 
  -3   8   0   13.69    0.52 
   2  -8   0    5.22    0.25 
   2  -8   0    5.16    0.25 
  -2   8   0    4.95    0.25 
  -2   8   0    5.38    0.24 
  -2   8   0    5.02    0.26 
  -2   8   0    4.85    0.25 
  -2   8   0    4.52    0.24 
   1  -8   0    7.43    0.34 
   1  -8   0    7.04    0.33 
  -1   8   0    7.84    0.33 
  -1   8   0    7.68    0.35 
  -1   8   0    7.66    0.35 
  -1   8   0    7.59    0.33 
  -1   8   0    8.04    0.35 
   0  -8   0    0.39    0.08 
   0  -8   0    0.61    0.10 
   0  -8   0    0.29    0.06 
   0   8   0    0.21    0.07 
   0   8   0    0.43    0.09 
   0   8   0    0.25    0.09 
   0   8   0    0.19    0.08 
   0   8   0    0.43    0.08 
  -1  -8   0    0.02    0.07 
  -1  -8   0    0.24    0.07 
  -1  -8   0    0.13    0.05 
   1   8   0    0.24    0.09 
   1   8   0    0.09    0.07 
   1   8   0    0.16    0.08 
   1   8   0    0.13    0.07 
   1   8   0    0.07    0.09 
  -2  -8   0    5.24    0.27 
  -2  -8   0    5.26    0.29 
   2   8   0    5.62    0.30 
   2   8   0    5.91    0.33 
   2   8   0    5.71    0.28 
   2   8   0    5.78    0.29 
   2   8   0    5.15    0.30 
  -3  -8   0   36.92    1.50 
  -3  -8   0   42.54    1.53 
   3   8   0   39.07    1.51 
   3   8   0   41.73    1.55 
   3   8   0   42.24    1.54 
   3   8   0   47.48    1.55 
   3   8   0   43.27    1.57 
  -4  -8   0    1.22    0.17 
  -4  -8   0    1.34    0.15 
   4   8   0    1.08    0.16 
   4   8   0    1.28    0.17 
   4   8   0    1.24    0.18 
   4   8   0    1.21    0.20 
   5   8   0    3.17    0.28 
   5   8   0    3.20    0.22 
   5   8   0    3.21    0.27 
   6   8   0    1.27    0.18 
   6   8   0    1.58    0.18 
   6   8   0    0.90    0.17 
   7   8   0    0.36    0.15 
   7   8   0    0.60    0.11 
   8   8   0    1.09    0.18 
 -15   9   0   14.34    0.65 
  14  -9   0    1.06    0.20 
 -14   9   0    0.79    0.15 
  13  -9   0    1.30    0.21 
 -13   9   0    1.62    0.20 
 -13   9   0    1.51    0.22 
  12  -9   0    8.71    0.50 
 -12   9   0    8.84    0.41 
 -12   9   0    8.53    0.43 
  11  -9   0    1.75    0.26 
 -11   9   0    1.96    0.18 
 -11   9   0    1.62    0.20 
  10  -9   0   12.64    0.60 
 -10   9   0   12.70    0.52 
 -10   9   0   11.72    0.53 
   9  -9   0   30.49    1.19 
  -9   9   0   30.59    1.12 
  -9   9   0   29.63    1.13 
   8  -9   0    4.60    0.31 
  -8   9   0    4.60    0.24 
  -8   9   0    4.45    0.26 
   7  -9   0    7.52    0.38 
  -7   9   0    7.10    0.35 
  -7   9   0    6.60    0.34 
  -7   9   0    7.18    0.32 
   6  -9   0   24.52    0.89 
   6  -9   0   24.63    0.93 
   6  -9   0   27.35    0.98 
  -6   9   0   25.06    0.93 
  -6   9   0   25.51    0.95 
  -6   9   0   24.18    0.94 
  -6   9   0   25.33    0.89 
   5  -9   0    4.01    0.25 
   5  -9   0    4.12    0.18 
   5  -9   0    3.94    0.21 
  -5   9   0    3.88    0.23 
  -5   9   0    3.93    0.22 
  -5   9   0    3.67    0.23 
  -5   9   0    4.14    0.20 
   4  -9   0    5.52    0.28 
   4  -9   0    5.19    0.26 
  -4   9   0    5.13    0.28 
  -4   9   0    5.69    0.27 
  -4   9   0    5.41    0.28 
  -4   9   0    5.27    0.25 
   3  -9   0    4.40    0.24 
   3  -9   0    5.15    0.26 
  -3   9   0    4.61    0.25 
  -3   9   0    4.29    0.24 
  -3   9   0    4.38    0.24 
  -3   9   0    4.45    0.26 
   2  -9   0    4.91    0.26 
   2  -9   0    5.43    0.27 
  -2   9   0    5.25    0.28 
  -2   9   0    4.93    0.28 
  -2   9   0    5.57    0.27 
  -2   9   0    4.69    0.28 
  -2   9   0    5.59    0.29 
   1  -9   0    2.09    0.18 
   1  -9   0    2.40    0.17 
  -1   9   0    2.32    0.19 
  -1   9   0    2.24    0.19 
  -1   9   0    2.44    0.16 
  -1   9   0    2.31    0.19 
  -1   9   0    2.29    0.18 
   0  -9   0   19.56    0.74 
   0  -9   0   18.95    0.72 
   0   9   0   17.47    0.74 
   0   9   0   19.22    0.75 
   0   9   0   18.50    0.75 
   0   9   0   19.28    0.76 
   0   9   0   19.43    0.73 
  -1  -9   0   46.80    1.72 
  -1  -9   0   49.48    1.75 
   1   9   0   47.42    1.75 
   1   9   0   47.81    1.75 
   1   9   0   48.28    1.73 
   1   9   0   49.17    1.77 
   1   9   0   47.74    1.76 
  -2  -9   0   20.78    0.81 
  -2  -9   0   21.27    0.78 
   2   9   0   20.12    0.82 
   2   9   0   20.58    0.84 
   2   9   0   20.34    0.79 
   2   9   0   20.72    0.84 
   2   9   0   19.95    0.81 
   3   9   0    0.61    0.12 
   3   9   0    0.99    0.16 
   3   9   0    0.60    0.14 
   3   9   0    0.52    0.14 
   4   9   0   22.43    0.87 
   4   9   0   19.65    0.81 
   4   9   0   21.27    0.89 
   5   9   0    0.31    0.10 
   5   9   0    0.15    0.12 
   6   9   0    4.87    0.29 
   6   9   0    5.20    0.37 
   7   9   0    3.06    0.24 
 -15  10   0    1.24    0.19 
  14 -10   0    0.03    0.15 
 -14  10   0    0.00    0.11 
 -14  10   0   -0.04    0.11 
 -13  10   0    0.86    0.14 
 -13  10   0    0.63    0.14 
  12 -10   0    0.51    0.18 
 -12  10   0    0.62    0.13 
 -12  10   0    0.58    0.12 
  11 -10   0    2.85    0.29 
 -11  10   0    2.20    0.23 
 -11  10   0    2.24    0.21 
  10 -10   0   11.04    0.55 
 -10  10   0   11.08    0.47 
 -10  10   0   10.22    0.48 
   9 -10   0    1.73    0.25 
  -9  10   0    1.79    0.20 
  -9  10   0    1.87    0.18 
   8 -10   0    5.74    0.36 
  -8  10   0    5.96    0.32 
  -8  10   0    6.05    0.30 
   7 -10   0    0.84    0.15 
  -7  10   0    0.76    0.11 
  -7  10   0    0.89    0.12 
   6 -10   0    5.50    0.31 
  -6  10   0    5.06    0.27 
  -6  10   0    4.96    0.23 
  -6  10   0    5.27    0.29 
   5 -10   0   39.41    1.49 
  -5  10   0   40.90    1.44 
  -5  10   0   39.15    1.47 
  -5  10   0   41.66    1.46 
   4 -10   0    6.64    0.36 
  -4  10   0    7.67    0.35 
  -4  10   0    8.04    0.37 
  -4  10   0    8.17    0.35 
  -4  10   0    7.50    0.36 
   3 -10   0   14.06    0.55 
  -3  10   0   12.84    0.53 
  -3  10   0   12.37    0.55 
  -3  10   0   12.52    0.55 
  -3  10   0   13.16    0.54 
   2 -10   0  102.07    3.70 
  -2  10   0  104.59    3.72 
  -2  10   0  106.25    3.73 
  -2  10   0  106.59    3.73 
  -2  10   0  107.00    3.72 
  -2  10   0  108.03    3.71 
   1 -10   0   11.99    0.47 
  -1  10   0   11.12    0.49 
  -1  10   0   10.82    0.50 
  -1  10   0   11.43    0.51 
  -1  10   0   10.23    0.47 
   0 -10   0    9.44    0.39 
   0  10   0    8.50    0.40 
   0  10   0    8.40    0.43 
   0  10   0    8.84    0.42 
   0  10   0    9.13    0.45 
   0  10   0    8.72    0.42 
   1  10   0    0.36    0.10 
   1  10   0    0.35    0.11 
   1  10   0    0.36    0.13 
   1  10   0    0.39    0.18 
   2  10   0    6.06    0.37 
   2  10   0    6.14    0.34 
   2  10   0    5.88    0.32 
   3  10   0   12.59    0.53 
   3  10   0   11.77    0.59 
   4  10   0    5.11    0.30 
   4  10   0    4.81    0.36 
   5  10   0   26.64    1.11 
   5  10   0   26.68    1.02 
   6  10   0    0.41    0.12 
  14 -11   0    3.08    0.34 
 -14  11   0    3.73    0.31 
 -14  11   0    3.74    0.29 
  13 -11   0    3.76    0.36 
 -13  11   0    3.60    0.30 
 -13  11   0    3.77    0.28 
  12 -11   0    0.00    0.15 
 -12  11   0    0.03    0.10 
 -12  11   0    0.14    0.11 
  11 -11   0    5.23    0.40 
 -11  11   0    5.54    0.32 
 -11  11   0    5.07    0.33 
  10 -11   0    0.01    0.14 
 -10  11   0    0.20    0.11 
 -10  11   0    0.23    0.10 
   9 -11   0   10.21    0.54 
  -9  11   0   11.16    0.49 
  -9  11   0   10.76    0.48 
   8 -11   0   15.44    0.67 
  -8  11   0   14.47    0.60 
  -8  11   0   14.38    0.62 
   7 -11   0   58.07    2.16 
  -7  11   0   60.40    2.12 
  -7  11   0   59.22    2.14 
   6 -11   0   20.40    0.80 
  -6  11   0   18.64    0.77 
  -6  11   0   18.47    0.75 
   5 -11   0    9.94    0.44 
  -5  11   0    8.63    0.39 
  -5  11   0    8.17    0.42 
  -5  11   0    9.28    0.41 
   4 -11   0    1.26    0.17 
  -4  11   0    0.84    0.12 
  -4  11   0    1.06    0.14 
  -4  11   0    1.15    0.15 
   3 -11   0    3.67    0.24 
  -3  11   0    3.79    0.24 
  -3  11   0    3.51    0.24 
  -3  11   0    3.12    0.25 
   2 -11   0    0.20    0.09 
  -2  11   0    0.25    0.10 
  -2  11   0    0.01    0.07 
  -2  11   0    0.30    0.10 
  -2  11   0    0.14    0.09 
  -1  11   0    6.27    0.35 
  -1  11   0    6.45    0.36 
  -1  11   0    6.12    0.33 
   0  11   0    5.44    0.33 
   0  11   0    6.24    0.32 
   0  11   0    5.10    0.35 
   1  11   0   19.95    0.83 
   1  11   0   19.56    0.85 
   1  11   0   21.60    0.81 
   2  11   0   26.96    1.04 
   2  11   0   27.84    1.11 
   3  11   0   13.35    0.62 
   3  11   0   11.53    0.54 
   4  11   0    0.23    0.11 
   5  11   0    4.30    0.30 
 -14  12   0    3.66    0.31 
 -14  12   0    3.34    0.29 
  13 -12   0    4.44    0.39 
 -13  12   0    4.40    0.33 
 -13  12   0    4.45    0.31 
  12 -12   0    0.12    0.16 
 -12  12   0    0.02    0.10 
 -12  12   0   -0.03    0.12 
  11 -12   0   29.11    1.19 
 -11  12   0   27.62    1.12 
 -11  12   0   29.21    1.10 
  10 -12   0   39.14    1.53 
 -10  12   0   38.80    1.47 
 -10  12   0   39.78    1.46 
   9 -12   0    6.48    0.40 
  -9  12   0    6.09    0.34 
  -9  12   0    6.27    0.36 
   8 -12   0    0.51    0.15 
  -8  12   0    0.64    0.12 
  -8  12   0    0.34    0.12 
   7 -12   0    3.93    0.29 
  -7  12   0    3.65    0.26 
  -7  12   0    3.31    0.27 
   6 -12   0   18.70    0.76 
  -6  12   0   17.85    0.75 
  -6  12   0   17.54    0.72 
   5 -12   0    8.39    0.41 
  -5  12   0    7.83    0.41 
  -5  12   0    8.28    0.39 
   4 -12   0    5.76    0.32 
  -4  12   0    5.01    0.32 
  -4  12   0    5.32    0.30 
  -4  12   0    4.86    0.29 
  -3  12   0    1.27    0.18 
  -3  12   0    1.15    0.19 
  -3  12   0    1.25    0.17 
  -2  12   0    0.32    0.09 
  -2  12   0    0.78    0.13 
  -2  12   0    1.30    0.19 
  -1  12   0    4.99    0.33 
  -1  12   0    5.34    0.31 
  -1  12   0    5.07    0.33 
   0  12   0   30.44    1.26 
   0  12   0   33.13    1.29 
   0  12   0   35.31    1.25 
   1  12   0    7.09    0.43 
   1  12   0    7.51    0.39 
   2  12   0    0.29    0.12 
   2  12   0    0.38    0.15 
   3  12   0    0.16    0.12 
  13 -13   0    0.84    0.21 
 -13  13   0    0.79    0.16 
 -13  13   0    1.27    0.19 
  12 -13   0    1.47    0.25 
 -12  13   0    1.61    0.26 
 -12  13   0    1.25    0.17 
  11 -13   0    4.82    0.37 
 -11  13   0    4.41    0.33 
 -11  13   0    4.06    0.31 
  10 -13   0    1.52    0.27 
 -10  13   0    1.64    0.25 
 -10  13   0    1.36    0.22 
   9 -13   0    2.06    0.27 
  -9  13   0    2.25    0.26 
  -9  13   0    2.35    0.24 
   8 -13   0    2.52    0.27 
  -8  13   0    2.28    0.25 
  -8  13   0    2.23    0.23 
   7 -13   0   15.25    0.66 
  -7  13   0   13.44    0.63 
  -7  13   0   14.75    0.62 
  -6  13   0    7.63    0.39 
  -6  13   0    7.13    0.40 
  -5  13   0    5.04    0.31 
  -5  13   0    5.75    0.35 
  -4  13   0    1.70    0.21 
  -4  13   0    1.67    0.23 
  -3  13   0    7.40    0.38 
  -3  13   0    6.83    0.38 
  -2  13   0    0.83    0.15 
  -2  13   0    1.27    0.21 
  -2  13   0    0.81    0.15 
  -1  13   0    0.20    0.12 
  -1  13   0    0.39    0.13 
   0  13   0    6.05    0.35 
   0  13   0    5.42    0.38 
   1  13   0    1.88    0.24 
   1  13   0    2.40    0.29 
   2  13   0   -0.07    0.11 
 -12  14   0    0.33    0.15 
  11 -14   0    0.66    0.19 
 -11  14   0    0.40    0.13 
 -11  14   0    0.55    0.16 
  10 -14   0    5.92    0.44 
 -10  14   0    5.64    0.38 
 -10  14   0    6.21    0.37 
  -9  14   0    4.66    0.32 
  -9  14   0    4.37    0.34 
  -8  14   0    1.95    0.27 
  -8  14   0    2.09    0.23 
  -7  14   0    0.05    0.12 
  -7  14   0    0.01    0.10 
  -6  14   0    0.54    0.14 
  -6  14   0    0.40    0.12 
  -5  14   0    0.50    0.14 
  -5  14   0    0.42    0.13 
  -4  14   0   -0.03    0.11 
  -4  14   0   -0.01    0.15 
  -3  14   0    1.92    0.24 
  -2  14   0    9.42    0.47 
  -1  14   0    2.72    0.29 
  -1  14   0    3.23    0.28 
   0  14   0   -0.08    0.14 
   0  14   0   -0.17    0.11 
  -9  15   0    5.27    0.39 
  -9  15   0    5.09    0.35 
  -8  15   0    2.17    0.26 
  -8  15   0    2.55    0.30 
  -7  15   0    1.12    0.17 
  -7  15   0    1.29    0.20 
  -6  15   0    0.42    0.14 
  -6  15   0    0.74    0.16 
  -5  15   0    6.76    0.39 
  -4  15   0    3.07    0.29 
  -3  15   0    2.11    0.26 
  -2  15  -1    0.05    0.12 
  -3  15  -1    1.00    0.28 
  -3  15  -1    1.23    0.17 
  -4  15  -1    0.64    0.16 
  -4  15  -1    0.56    0.14 
  -5  15  -1    0.24    0.13 
  -5  15  -1    0.64    0.16 
  -6  15  -1    6.80    0.42 
  -6  15  -1    7.27    0.40 
  -7  15  -1    1.33    0.23 
  -7  15  -1    1.29    0.19 
  -8  15  -1    0.09    0.14 
  -8  15  -1    0.13    0.11 
  -9  15  -1    0.19    0.14 
  -9  15  -1    0.19    0.12 
 -10  15  -1    0.25    0.14 
 -10  15  -1    0.63    0.17 
   1  14  -1    0.06    0.12 
   0  14  -1    0.38    0.13 
   0  14  -1    0.36    0.15 
  -1  14  -1    2.18    0.26 
  -1  14  -1    1.85    0.25 
  -2  14  -1    0.42    0.13 
  -2  14  -1    0.43    0.15 
  -3  14  -1    0.02    0.12 
  -3  14  -1    0.12    0.12 
  -4  14  -1    6.94    0.40 
  -4  14  -1    6.73    0.37 
  -5  14  -1    9.45    0.48 
  -5  14  -1    9.02    0.45 
  -6  14  -1    2.09    0.26 
  -6  14  -1    2.00    0.23 
  -7  14  -1    0.36    0.12 
  -7  14  -1    0.40    0.14 
  -8  14  -1    0.28    0.13 
  -8  14  -1    0.19    0.11 
  -9  14  -1   11.64    0.56 
  -9  14  -1   11.94    0.54 
 -10  14  -1    3.90    0.31 
 -10  14  -1    4.58    0.33 
  10 -14   1    4.61    0.39 
 -11  14  -1    0.44    0.14 
 -11  14  -1    0.31    0.14 
  11 -14   1    0.30    0.17 
 -12  14  -1    0.70    0.16 
   3  13  -1    1.96    0.25 
   2  13  -1    1.46    0.24 
   2  13  -1    1.95    0.30 
   1  13  -1   18.13    0.81 
   1  13  -1   18.80    0.76 
   0  13  -1    0.02    0.11 
   0  13  -1   -0.08    0.11 
   0  13  -1    0.03    0.12 
  -1  13  -1   21.64    0.86 
  -1  13  -1   21.30    0.89 
  -2  13  -1    0.44    0.12 
  -2  13  -1    0.39    0.12 
  -2  13  -1    0.29    0.12 
  -3  13  -1    0.32    0.12 
  -3  13  -1    0.17    0.10 
  -3  13  -1    0.12    0.10 
  -4  13  -1   15.83    0.70 
  -4  13  -1   17.39    0.69 
  -5  13  -1    2.24    0.25 
  -5  13  -1    2.67    0.23 
  -6  13  -1    0.80    0.13 
  -6  13  -1    0.71    0.13 
  -7  13  -1   16.49    0.67 
  -7  13  -1   15.08    0.68 
   7 -13   1   16.49    0.70 
  -8  13  -1    4.73    0.29 
  -8  13  -1    4.31    0.31 
   8 -13   1    4.39    0.32 
  -9  13  -1   13.15    0.57 
  -9  13  -1   13.07    0.60 
   9 -13   1   13.76    0.64 
 -10  13  -1   22.05    0.88 
 -10  13  -1   22.58    0.90 
  10 -13   1   22.09    0.95 
 -11  13  -1    1.27    0.17 
 -11  13  -1    1.32    0.18 
  11 -13   1    1.69    0.28 
 -12  13  -1    5.58    0.36 
 -13  13  -1    7.61    0.44 
  13 -13   1    7.49    0.47 
   4  12  -1   21.71    0.87 
   3  12  -1    3.50    0.28 
   3  12  -1    3.96    0.33 
   2  12  -1    0.82    0.14 
   2  12  -1    0.78    0.17 
   1  12  -1    0.45    0.14 
   1  12  -1    0.61    0.14 
   1  12  -1    0.33    0.12 
   0  12  -1    0.12    0.08 
   0  12  -1    0.29    0.12 
   0  12  -1    0.14    0.10 
  -1  12  -1    5.61    0.34 
  -1  12  -1    5.30    0.31 
  -1  12  -1    5.69    0.34 
  -2  12  -1    9.95    0.47 
  -2  12  -1   10.17    0.47 
  -2  12  -1    9.51    0.45 
  -3  12  -1   11.56    0.50 
  -3  12  -1   11.36    0.52 
  -3  12  -1   11.69    0.51 
  -4  12  -1    0.32    0.11 
  -4  12  -1    0.45    0.10 
  -4  12  -1    0.29    0.10 
   4 -12   1    0.56    0.17 
  -5  12  -1    1.72    0.21 
  -5  12  -1    1.65    0.19 
   5 -12   1    1.48    0.19 
  -6  12  -1   34.41    1.31 
  -6  12  -1   36.55    1.29 
   6 -12   1   33.44    1.31 
  -7  12  -1    7.16    0.38 
  -7  12  -1    7.32    0.36 
   7 -12   1    6.98    0.39 
  -8  12  -1    6.45    0.34 
  -8  12  -1    6.41    0.36 
   8 -12   1    7.04    0.39 
  -9  12  -1    0.08    0.10 
  -9  12  -1    0.09    0.09 
   9 -12   1    0.12    0.13 
 -10  12  -1    0.12    0.11 
 -10  12  -1    0.03    0.09 
  10 -12   1    0.25    0.14 
 -11  12  -1    6.11    0.34 
 -11  12  -1    5.81    0.36 
  11 -12   1    6.10    0.42 
 -12  12  -1   11.49    0.54 
 -13  12  -1    1.30    0.18 
  13 -12   1    0.96    0.20 
 -14  12  -1   11.80    0.57 
   6  11  -1    6.15    0.36 
   5  11  -1    1.37    0.22 
   4  11  -1    8.77    0.49 
   4  11  -1    8.25    0.42 
   3  11  -1    0.85    0.14 
   3  11  -1    0.79    0.16 
   2  11  -1    8.82    0.48 
   2  11  -1   10.34    0.45 
   2  11  -1    8.89    0.46 
   1  11  -1   25.42    1.03 
   1  11  -1   26.78    0.99 
   1  11  -1   25.02    1.01 
   0  11  -1   80.77    2.87 
   0  11  -1   81.43    2.91 
  -1  11  -1    2.05    0.22 
  -1  11  -1    2.00    0.20 
  -1  11  -1    1.73    0.19 
  -1  11  -1    2.16    0.21 
  -2  11  -1   -0.07    0.07 
  -2  11  -1    0.09    0.09 
  -2  11  -1    0.03    0.09 
  -2  11  -1    0.00    0.08 
   2 -11   1    0.12    0.08 
  -3  11  -1    4.26    0.27 
  -3  11  -1    4.73    0.26 
  -3  11  -1    4.45    0.26 
   3 -11   1    4.18    0.24 
  -4  11  -1   29.75    1.11 
  -4  11  -1   29.44    1.09 
  -4  11  -1   29.12    1.09 
   4 -11   1   28.93    1.10 
  -5  11  -1   26.29    1.00 
  -5  11  -1   26.96    1.02 
  -5  11  -1   26.87    1.04 
   5 -11   1   29.08    1.05 
  -6  11  -1   57.61    2.05 
  -6  11  -1   55.55    2.07 
   6 -11   1   59.44    2.09 
  -7  11  -1    3.30    0.25 
  -7  11  -1    3.26    0.23 
   7 -11   1    3.58    0.27 
  -8  11  -1   30.44    1.17 
  -8  11  -1   31.43    1.16 
   8 -11   1   31.74    1.22 
  -9  11  -1   14.86    0.61 
  -9  11  -1   14.54    0.59 
   9 -11   1   13.92    0.65 
 -10  11  -1    0.14    0.10 
 -10  11  -1    0.24    0.09 
  10 -11   1    0.02    0.13 
 -11  11  -1    2.37    0.23 
 -11  11  -1    2.82    0.22 
  11 -11   1    2.29    0.30 
 -12  11  -1    0.20    0.13 
 -12  11  -1    0.37    0.12 
 -13  11  -1    5.51    0.35 
  13 -11   1    5.97    0.41 
 -14  11  -1    0.08    0.12 
  14 -11   1    0.03    0.15 
   7  10  -1   -0.01    0.11 
   6  10  -1   16.86    0.70 
   5  10  -1   34.96    1.40 
   5  10  -1   35.73    1.32 
   4  10  -1    0.29    0.14 
   4  10  -1    0.26    0.11 
   3  10  -1   39.90    1.51 
   3  10  -1   38.53    1.54 
   3  10  -1   43.08    1.49 
   2  10  -1   32.33    1.26 
   2  10  -1   35.57    1.32 
   2  10  -1   34.87    1.29 
   1  10  -1   31.78    1.21 
   1  10  -1   32.80    1.26 
   1  10  -1   34.18    1.25 
   0  10  -1    0.45    0.10 
   0  10  -1    0.64    0.15 
   0  10  -1    0.48    0.10 
   0  10  -1    0.47    0.10 
   0  10  -1    0.64    0.12 
   0 -10   1    0.67    0.11 
  -1  10  -1    2.22    0.21 
  -1  10  -1    2.24    0.21 
  -1  10  -1    2.45    0.19 
  -1  10  -1    2.04    0.20 
  -1  10  -1    2.36    0.20 
   1 -10   1    2.09    0.16 
  -2  10  -1    0.28    0.09 
  -2  10  -1    0.28    0.09 
  -2  10  -1    0.27    0.09 
  -2  10  -1    0.34    0.09 
   2 -10   1    0.48    0.09 
  -3  10  -1    4.59    0.26 
  -3  10  -1    4.55    0.25 
  -3  10  -1    4.81    0.26 
  -3  10  -1    4.43    0.25 
   3 -10   1    4.64    0.25 
  -4  10  -1    0.73    0.10 
  -4  10  -1    0.65    0.11 
  -4  10  -1    0.73    0.12 
  -4  10  -1    0.58    0.12 
   4 -10   1    0.87    0.15 
  -5  10  -1    5.95    0.27 
  -5  10  -1    6.00    0.31 
  -5  10  -1    6.27    0.30 
   5 -10   1    6.81    0.33 
  -6  10  -1    1.01    0.09 
  -6  10  -1    1.22    0.17 
  -6  10  -1    1.00    0.14 
   6 -10   1    1.03    0.17 
  -7  10  -1    0.38    0.09 
  -7  10  -1    0.15    0.09 
   7 -10   1    0.26    0.11 
  -8  10  -1    6.70    0.34 
  -8  10  -1    6.72    0.32 
   8 -10   1    6.86    0.38 
  -9  10  -1    0.37    0.11 
  -9  10  -1    0.32    0.09 
   9 -10   1    0.22    0.14 
 -10  10  -1   29.00    1.10 
 -10  10  -1   28.96    1.08 
  10 -10   1   28.99    1.17 
 -11  10  -1   11.86    0.51 
 -11  10  -1   11.90    0.53 
  11 -10   1   12.20    0.60 
 -12  10  -1    5.72    0.30 
 -12  10  -1    5.13    0.32 
  12 -10   1    5.39    0.36 
 -13  10  -1   10.21    0.49 
  13 -10   1   10.02    0.54 
 -14  10  -1    5.52    0.35 
  14 -10   1    5.23    0.39 
 -15  10  -1    1.18    0.18 
   8   9  -1   17.14    0.70 
   7   9  -1    0.27    0.11 
   6   9  -1    3.24    0.31 
   6   9  -1    3.78    0.25 
   5   9  -1    6.86    0.35 
   5   9  -1    7.15    0.42 
   4   9  -1   12.34    0.59 
   4   9  -1   12.49    0.53 
   4   9  -1   12.33    0.55 
   3   9  -1    0.02    0.10 
   3   9  -1    0.13    0.11 
   3   9  -1    0.19    0.10 
   3   9  -1    0.09    0.08 
   2   9  -1   19.07    0.80 
   2   9  -1   20.18    0.76 
   2   9  -1   19.83    0.78 
   2   9  -1   20.22    0.78 
   2   9  -1   20.14    0.79 
  -2  -9   1   18.66    0.73 
  -2  -9   1   19.35    0.77 
   1   9  -1    0.31    0.09 
   1   9  -1    0.20    0.09 
   1   9  -1    0.38    0.11 
   1   9  -1    0.55    0.10 
  -1  -9   1    0.39    0.07 
  -1  -9   1    0.31    0.08 
   0   9  -1   10.84    0.46 
   0   9  -1   10.96    0.46 
   0   9  -1    9.68    0.44 
   0   9  -1   10.02    0.46 
   0   9  -1   10.10    0.47 
   0  -9   1   10.13    0.44 
   0  -9   1   10.51    0.40 
   0  -9   1   11.33    0.42 
  -1   9  -1    2.53    0.15 
  -1   9  -1    2.34    0.19 
  -1   9  -1    2.39    0.19 
  -1   9  -1    2.96    0.19 
  -1   9  -1    2.52    0.20 
  -1   9  -1    2.85    0.18 
   1  -9   1    2.65    0.18 
   1  -9   1    2.69    0.16 
  -2   9  -1   15.75    0.64 
  -2   9  -1   15.93    0.64 
  -2   9  -1   16.56    0.64 
  -2   9  -1   16.48    0.62 
  -2   9  -1   16.68    0.63 
   2  -9   1   17.02    0.63 
   2  -9   1   15.36    0.62 
   2  -9   1   16.46    0.59 
  -3   9  -1   23.62    0.89 
  -3   9  -1   23.61    0.89 
  -3   9  -1   24.00    0.88 
  -3   9  -1   22.84    0.87 
  -3   9  -1   22.93    0.88 
  -3   9  -1   24.58    0.88 
   3  -9   1   24.99    0.88 
   3  -9   1   23.70    0.89 
   3  -9   1   22.76    0.87 
   3  -9   1   22.83    0.83 
  -4   9  -1   18.78    0.76 
  -4   9  -1   20.58    0.75 
  -4   9  -1   20.00    0.77 
  -4   9  -1   20.73    0.77 
  -4   9  -1   20.15    0.75 
   4  -9   1   20.18    0.75 
   4  -9   1   20.54    0.78 
   4  -9   1   20.37    0.77 
  -5   9  -1    0.94    0.12 
  -5   9  -1    0.90    0.14 
  -5   9  -1    0.99    0.12 
  -5   9  -1    0.81    0.13 
   5  -9   1    0.85    0.11 
   5  -9   1    0.87    0.13 
   5  -9   1    0.98    0.15 
  -6   9  -1    0.02    0.06 
  -6   9  -1   -0.01    0.07 
  -6   9  -1    0.06    0.06 
  -6   9  -1    0.03    0.06 
   6  -9   1    0.14    0.06 
   6  -9   1    0.01    0.09 
  -7   9  -1   30.04    1.12 
  -7   9  -1   30.88    1.11 
   7  -9   1   30.59    1.17 
  -8   9  -1   56.70    2.04 
  -8   9  -1   57.95    2.02 
   8  -9   1   56.62    2.09 
  -9   9  -1    5.70    0.30 
  -9   9  -1    5.78    0.28 
   9  -9   1    5.35    0.35 
 -10   9  -1   64.79    2.27 
 -10   9  -1   63.95    2.29 
  10  -9   1   63.35    2.36 
 -11   9  -1   16.85    0.69 
 -11   9  -1   16.94    0.67 
 -12   9  -1    2.72    0.21 
 -12   9  -1    2.71    0.24 
  12  -9   1    3.04    0.28 
 -13   9  -1    0.52    0.18 
 -13   9  -1    0.12    0.11 
  13  -9   1    0.23    0.16 
 -14   9  -1    3.33    0.28 
  14  -9   1    3.10    0.33 
 -15   9  -1    1.67    0.25 
   9   8  -1    3.29    0.25 
   8   8  -1   18.72    0.75 
   7   8  -1    4.04    0.27 
   7   8  -1    4.91    0.37 
   6   8  -1    0.58    0.11 
   6   8  -1    0.69    0.16 
   6   8  -1    0.46    0.15 
   5   8  -1    5.19    0.29 
   5   8  -1    5.22    0.31 
   5   8  -1    5.43    0.35 
   5   8  -1    5.00    0.33 
   4   8  -1   46.07    1.67 
   4   8  -1   45.40    1.66 
   4   8  -1   43.07    1.69 
   4   8  -1   44.62    1.66 
   4   8  -1   45.13    1.64 
  -4  -8   1   45.21    1.65 
  -4  -8   1   47.39    1.62 
   3   8  -1    0.20    0.08 
   3   8  -1    0.27    0.09 
   3   8  -1    0.15    0.08 
   3   8  -1    0.07    0.10 
   3   8  -1    0.11    0.10 
  -3  -8   1    0.14    0.07 
  -3  -8   1    0.25    0.07 
   2   8  -1   30.48    1.28 
   2   8  -1   34.05    1.27 
   2   8  -1   34.47    1.25 
   2   8  -1   33.85    1.27 
   2   8  -1   38.03    1.28 
  -2  -8   1   37.25    1.23 
  -2  -8   1   32.56    1.21 
  -2  -8   1   33.48    1.26 
   1   8  -1   24.22    0.86 
   1   8  -1   22.43    0.88 
   1   8  -1   21.54    0.89 
   1   8  -1   25.38    0.89 
  -1  -8   1   23.53    0.84 
  -1  -8   1   21.86    0.83 
  -1  -8   1   22.91    0.87 
   0   8  -1    6.33    0.31 
   0   8  -1    6.65    0.32 
   0   8  -1    7.04    0.34 
   0   8  -1    7.00    0.30 
   0   8  -1    6.56    0.31 
   0  -8   1    6.39    0.30 
   0  -8   1    6.87    0.28 
   0  -8   1    6.67    0.27 
  -1   8  -1    1.93    0.16 
  -1   8  -1    2.21    0.16 
  -1   8  -1    1.87    0.14 
  -1   8  -1    2.06    0.13 
  -1   8  -1    2.11    0.17 
   1  -8   1    2.00    0.12 
   1  -8   1    1.89    0.13 
   1  -8   1    2.12    0.15 
  -2   8  -1   34.25    1.23 
  -2   8  -1   34.86    1.23 
  -2   8  -1   30.64    1.21 
  -2   8  -1   35.64    1.23 
  -2   8  -1   35.65    1.22 
  -2   8  -1   34.20    1.23 
   2  -8   1   35.01    1.22 
   2  -8   1   34.80    1.23 
   2  -8   1   32.03    1.19 
   2  -8   1   31.85    1.21 
  -3   8  -1   14.34    0.57 
  -3   8  -1   15.81    0.57 
  -3   8  -1   14.82    0.56 
  -3   8  -1   14.31    0.57 
  -3   8  -1   14.43    0.57 
  -3   8  -1   14.74    0.56 
   3  -8   1   14.22    0.53 
   3  -8   1   14.37    0.56 
   3  -8   1   14.15    0.57 
   3  -8   1   15.10    0.57 
  -4   8  -1  110.58    3.91 
  -4   8  -1  110.88    3.92 
  -4   8  -1  113.31    3.92 
  -4   8  -1  117.57    3.93 
  -4   8  -1  111.09    3.90 
  -4   8  -1  116.69    3.93 
   4  -8   1  108.91    3.93 
   4  -8   1  111.96    3.91 
   4  -8   1  113.06    3.93 
  -5   8  -1  126.09    4.30 
  -5   8  -1  124.48    4.34 
  -5   8  -1  126.73    4.34 
  -5   8  -1  122.61    4.34 
  -5   8  -1  127.19    4.33 
   5  -8   1  118.35    4.36 
   5  -8   1  127.46    4.34 
   5  -8   1  125.47    4.33 
  -6   8  -1   34.42    1.27 
  -6   8  -1   35.99    1.26 
  -6   8  -1   35.89    1.28 
  -6   8  -1   34.73    1.27 
   6  -8   1   36.43    1.31 
   6  -8   1   35.24    1.28 
   6  -8   1   33.96    1.26 
  -7   8  -1    0.21    0.07 
  -7   8  -1    0.22    0.06 
  -7   8  -1    0.18    0.07 
  -7   8  -1    0.20    0.07 
   7  -8   1    0.07    0.05 
   7  -8   1    0.13    0.07 
   7  -8   1    0.02    0.09 
  -8   8  -1    2.65    0.19 
  -8   8  -1    2.39    0.20 
  -8   8  -1    2.91    0.17 
   8  -8   1    3.14    0.26 
  -9   8  -1   10.88    0.45 
  -9   8  -1   10.97    0.47 
   9  -8   1   11.32    0.53 
 -10   8  -1    5.71    0.31 
 -10   8  -1    5.83    0.29 
  10  -8   1    6.40    0.38 
 -11   8  -1   10.73    0.48 
 -11   8  -1   10.53    0.46 
  11  -8   1   11.66    0.53 
 -12   8  -1    3.69    0.26 
 -12   8  -1    3.51    0.23 
  12  -8   1    3.47    0.29 
 -13   8  -1    4.12    0.28 
 -13   8  -1    4.07    0.26 
  13  -8   1    3.76    0.33 
 -14   8  -1   10.82    0.51 
  14  -8   1   10.44    0.56 
 -15   8  -1   15.50    0.69 
  10   7  -1    0.24    0.10 
   9   7  -1    2.35    0.21 
   8   7  -1    0.01    0.13 
   8   7  -1    0.23    0.10 
   8   7  -1    0.31    0.21 
   7   7  -1    2.56    0.27 
   7   7  -1    2.92    0.21 
   7   7  -1    2.37    0.27 
   6   7  -1    5.55    0.35 
   6   7  -1    5.51    0.32 
   6   7  -1    5.32    0.29 
   6   7  -1    5.34    0.33 
  -6  -7   1    5.31    0.29 
  -6  -7   1    6.31    0.32 
   5   7  -1   43.45    1.60 
   5   7  -1   44.91    1.61 
   5   7  -1   43.72    1.65 
   5   7  -1   44.26    1.62 
   5   7  -1   42.65    1.58 
  -5  -7   1   44.91    1.61 
  -5  -7   1   43.39    1.58 
   4   7  -1    1.19    0.15 
   4   7  -1    1.62    0.21 
   4   7  -1    1.58    0.17 
   4   7  -1    1.59    0.19 
   4   7  -1    1.60    0.16 
  -4  -7   1    1.46    0.14 
  -4  -7   1    1.86    0.16 
   3   7  -1   54.77    2.11 
   3   7  -1   61.81    2.13 
   3   7  -1   60.58    2.16 
   3   7  -1   59.92    2.13 
   3   7  -1   56.90    2.13 
  -3  -7   1   58.02    2.10 
  -3  -7   1   64.00    2.13 
  -3  -7   1   61.04    2.09 
   2   7  -1  126.68    4.34 
   2   7  -1  130.55    4.36 
   2   7  -1  134.58    4.39 
   2   7  -1  126.29    4.36 
  -2  -7   1  123.00    4.31 
  -2  -7   1  103.86    4.31 
  -2  -7   1  128.99    4.35 
   1   7  -1   69.48    2.46 
   1   7  -1   66.99    2.47 
   1   7  -1   69.19    2.44 
   1   7  -1   69.07    2.46 
   1   7  -1   66.87    2.45 
  -1  -7   1   74.74    2.43 
  -1  -7   1   71.12    2.42 
  -1  -7   1   68.54    2.45 
   0   7  -1    2.15    0.17 
   0   7  -1    2.11    0.15 
   0   7  -1    2.09    0.15 
   0   7  -1    2.30    0.14 
   0   7  -1    2.38    0.16 
   0   7  -1    2.16    0.15 
   0  -7   1    2.22    0.11 
   0  -7   1    2.40    0.13 
   0  -7   1    2.24    0.15 
  -1   7  -1    5.27    0.25 
  -1   7  -1    5.33    0.27 
  -1   7  -1    5.75    0.26 
  -1   7  -1    5.61    0.24 
  -1   7  -1    5.34    0.25 
  -1   7  -1    5.43    0.26 
   1  -7   1    5.74    0.23 
   1  -7   1    6.51    0.25 
   1  -7   1    5.37    0.25 
   1  -7   1    5.68    0.26 
  -2   7  -1   58.41    2.05 
  -2   7  -1   63.21    2.05 
  -2   7  -1   59.64    2.05 
  -2   7  -1   57.09    2.03 
  -2   7  -1   58.29    2.04 
  -2   7  -1   58.61    2.03 
   2  -7   1   55.09    2.01 
   2  -7   1   57.57    2.04 
   2  -7   1   53.49    2.03 
   2  -7   1   58.61    2.05 
  -3   7  -1  117.72    4.01 
  -3   7  -1  117.56    4.01 
  -3   7  -1  116.29    4.00 
  -3   7  -1  116.43    4.02 
  -3   7  -1  116.16    4.02 
  -3   7  -1  116.28    4.00 
   3  -7   1  117.07    4.01 
   3  -7   1  106.93    3.98 
   3  -7   1  115.62    4.02 
  -4   7  -1   27.25    0.96 
  -4   7  -1   23.17    0.96 
  -4   7  -1   27.87    0.95 
  -4   7  -1   28.57    0.96 
  -4   7  -1   24.91    0.96 
  -4   7  -1   26.17    0.94 
   4  -7   1   27.62    0.98 
   4  -7   1   26.49    0.96 
   4  -7   1   26.04    0.95 
  -5   7  -1    2.36    0.14 
  -5   7  -1    2.24    0.14 
  -5   7  -1    1.98    0.15 
  -5   7  -1    2.47    0.15 
   5  -7   1    2.58    0.18 
   5  -7   1    2.46    0.15 
   5  -7   1    2.13    0.13 
  -6   7  -1    7.64    0.32 
  -6   7  -1    8.30    0.34 
  -6   7  -1    7.82    0.33 
  -6   7  -1    7.87    0.34 
   6  -7   1    8.98    0.38 
   6  -7   1    8.21    0.32 
   6  -7   1    7.90    0.34 
  -7   7  -1   19.54    0.71 
  -7   7  -1   18.85    0.69 
  -7   7  -1   18.71    0.71 
   7  -7   1   18.49    0.69 
   7  -7   1   19.05    0.71 
   7  -7   1   18.11    0.75 
  -8   7  -1   15.85    0.62 
  -8   7  -1   16.11    0.61 
  -8   7  -1   16.56    0.62 
   8  -7   1   15.61    0.60 
   8  -7   1   16.63    0.68 
   8  -7   1   15.73    0.62 
  -9   7  -1   75.83    2.75 
  -9   7  -1   79.53    2.74 
   9  -7   1   79.00    2.82 
 -10   7  -1   12.88    0.51 
 -10   7  -1   13.39    0.54 
  10  -7   1   12.49    0.56 
 -11   7  -1    1.99    0.19 
 -11   7  -1    1.69    0.17 
  11  -7   1    2.03    0.23 
 -12   7  -1   16.83    0.66 
 -12   7  -1   16.81    0.68 
  12  -7   1   15.88    0.72 
 -13   7  -1    0.92    0.14 
  13  -7   1    0.94    0.18 
 -14   7  -1    6.42    0.37 
  14  -7   1    6.40    0.42 
 -15   7  -1    2.62    0.27 
  11   6  -1    7.43    0.35 
  10   6  -1   19.94    0.77 
   9   6  -1   17.24    0.77 
   9   6  -1   16.52    0.66 
   9   6  -1   15.66    0.72 
   8   6  -1   17.50    0.74 
   8   6  -1   17.11    0.68 
   8   6  -1   16.79    0.77 
   8   6  -1   17.45    0.69 
  -8  -6   1   17.48    0.75 
   7   6  -1    6.11    0.30 
   7   6  -1    5.82    0.34 
   7   6  -1    5.86    0.30 
   7   6  -1    5.93    0.38 
  -7  -6   1    5.92    0.33 
  -7  -6   1    6.18    0.32 
   6   6  -1    2.84    0.19 
   6   6  -1    3.01    0.22 
   6   6  -1    2.91    0.20 
   6   6  -1    2.69    0.20 
   6   6  -1    2.85    0.26 
   6   6  -1    2.81    0.23 
  -6  -6   1    2.84    0.21 
  -6  -6   1    3.01    0.22 
   5   6  -1   10.72    0.46 
   5   6  -1   10.53    0.47 
   5   6  -1   11.09    0.50 
   5   6  -1   11.08    0.46 
   5   6  -1   11.01    0.43 
   5   6  -1   10.51    0.44 
  -5  -6   1   10.87    0.46 
  -5  -6   1    9.38    0.45 
   4   6  -1   37.67    1.40 
   4   6  -1   38.46    1.45 
   4   6  -1   41.17    1.42 
   4   6  -1   39.48    1.41 
   4   6  -1   38.44    1.42 
  -4  -6   1   40.02    1.41 
  -4  -6   1   36.57    1.39 
   3   6  -1   61.31    2.33 
   3   6  -1   68.15    2.34 
   3   6  -1   66.30    2.36 
   3   6  -1   64.11    2.33 
   3   6  -1   69.46    2.32 
  -3  -6   1   60.00    2.30 
  -3  -6   1   70.25    2.33 
  -3  -6   1   67.63    2.30 
   2   6  -1   62.87    2.57 
   2   6  -1   73.86    2.57 
   2   6  -1   76.05    2.55 
   2   6  -1   78.09    2.57 
  -2  -6   1   73.41    2.56 
  -2  -6   1   76.50    2.53 
  -2  -6   1   68.72    2.53 
   1   6  -1    5.65    0.26 
   1   6  -1    5.76    0.27 
   1   6  -1    5.29    0.25 
   1   6  -1    5.59    0.25 
   1   6  -1    5.21    0.25 
   1   6  -1    5.66    0.26 
  -1  -6   1    5.58    0.22 
  -1  -6   1    5.55    0.23 
  -1  -6   1    5.70    0.25 
   0   6  -1   30.59    1.09 
   0   6  -1   28.88    1.07 
   0   6  -1   32.59    1.11 
   0   6  -1   31.14    1.09 
   0   6  -1   33.61    1.08 
   0   6  -1   29.27    1.09 
   0  -6   1   30.52    1.09 
   0  -6   1   30.25    1.09 
   0  -6   1   25.57    1.06 
  -1   6  -1   55.33    1.91 
  -1   6  -1   54.52    1.91 
  -1   6  -1   58.18    1.90 
  -1   6  -1   55.74    1.91 
  -1   6  -1   55.77    1.91 
  -1   6  -1   50.62    1.90 
   1  -6   1   48.35    1.88 
   1  -6   1   55.20    1.91 
   1  -6   1   54.83    1.91 
  -2   6  -1    2.55    0.13 
  -2   6  -1    2.24    0.13 
  -2   6  -1    2.39    0.14 
  -2   6  -1    2.43    0.13 
  -2   6  -1    2.29    0.14 
   2  -6   1    2.33    0.14 
   2  -6   1    2.57    0.13 
   2  -6   1    2.29    0.11 
   2  -6   1    2.76    0.14 
  -3   6  -1    0.20    0.04 
  -3   6  -1    0.20    0.04 
  -3   6  -1    0.21    0.05 
  -3   6  -1    0.21    0.05 
  -3   6  -1    0.13    0.05 
  -3   6  -1    0.22    0.05 
   3  -6   1    0.22    0.05 
   3  -6   1    0.32    0.03 
   3  -6   1    0.18    0.06 
   3  -6   1    0.21    0.04 
  -4   6  -1    0.54    0.09 
  -4   6  -1    0.38    0.06 
  -4   6  -1    0.46    0.05 
  -4   6  -1    0.49    0.09 
  -4   6  -1    0.41    0.07 
  -4   6  -1    0.50    0.08 
   4  -6   1    0.40    0.08 
   4  -6   1    0.39    0.06 
   4  -6   1    0.52    0.07 
  -5   6  -1   22.65    0.79 
  -5   6  -1   21.82    0.78 
  -5   6  -1   21.69    0.79 
  -5   6  -1   21.43    0.79 
   5  -6   1   21.27    0.79 
   5  -6   1   21.37    0.78 
   5  -6   1   21.33    0.82 
  -6   6  -1   25.93    0.93 
  -6   6  -1   25.73    0.92 
  -6   6  -1   25.82    0.93 
  -6   6  -1   26.17    0.93 
   6  -6   1   25.86    0.94 
   6  -6   1   25.32    0.97 
   6  -6   1   25.21    0.92 
  -7   6  -1   28.94    1.07 
  -7   6  -1   30.42    1.09 
  -7   6  -1   30.15    1.09 
   7  -6   1   30.44    1.07 
   7  -6   1   29.97    1.09 
   7  -6   1   30.55    1.14 
  -8   6  -1   39.90    1.42 
  -8   6  -1   38.81    1.41 
  -8   6  -1   40.06    1.40 
  -8   6  -1   39.05    1.41 
   8  -6   1   37.90    1.41 
   8  -6   1   40.84    1.47 
   8  -6   1   39.18    1.39 
  -9   6  -1    0.46    0.09 
  -9   6  -1    0.43    0.09 
  -9   6  -1    0.36    0.07 
  -9   6  -1    0.34    0.08 
 -10   6  -1    2.33    0.17 
 -10   6  -1    2.64    0.19 
  10  -6   1    2.49    0.12 
  10  -6   1    3.18    0.24 
 -11   6  -1    1.22    0.16 
 -11   6  -1    0.98    0.15 
  11  -6   1    1.51    0.21 
 -12   6  -1    0.18    0.09 
  12  -6   1    0.23    0.14 
 -13   6  -1   19.34    0.78 
  13  -6   1   19.28    0.83 
 -14   6  -1    1.55    0.21 
  14  -6   1    1.22    0.22 
 -15   6  -1   -0.06    0.10 
  11   5  -1    8.88    0.40 
  10   5  -1   12.51    0.62 
  10   5  -1   12.75    0.52 
  10   5  -1   11.77    0.55 
   9   5  -1    8.40    0.46 
   9   5  -1    7.58    0.39 
   9   5  -1    7.63    0.36 
  -9  -5   1    7.87    0.40 
   8   5  -1    2.02    0.18 
   8   5  -1    2.53    0.26 
   8   5  -1    2.52    0.20 
  -8  -5   1    2.31    0.20 
  -8  -5   1    1.96    0.20 
   7   5  -1    6.99    0.40 
   7   5  -1    7.29    0.34 
   7   5  -1    7.96    0.36 
   7   5  -1    7.36    0.34 
   7   5  -1    7.43    0.36 
  -7  -5   1    7.45    0.36 
  -7  -5   1    6.96    0.35 
   6   5  -1   19.83    0.78 
   6   5  -1   17.25    0.72 
   6   5  -1   19.15    0.73 
   6   5  -1   18.66    0.71 
   6   5  -1   19.00    0.72 
  -6  -5   1   18.25    0.73 
  -6  -5   1   19.14    0.74 
   5   5  -1   65.34    2.41 
   5   5  -1   65.87    2.42 
   5   5  -1   69.27    2.41 
   5   5  -1   66.65    2.43 
   5   5  -1   72.26    2.47 
  -5  -5   1   70.12    2.48 
  -5  -5   1   69.60    2.43 
  -5  -5   1   69.65    2.43 
   4   5  -1   97.85    3.30 
   4   5  -1   92.71    3.29 
   4   5  -1   92.83    3.28 
   4   5  -1   96.56    3.26 
   4   5  -1   95.55    3.29 
   4   5  -1   88.89    3.31 
  -4  -5   1   86.66    3.28 
  -4  -5   1  100.14    3.29 
   3   5  -1    0.52    0.08 
   3   5  -1    0.67    0.10 
   3   5  -1    0.41    0.09 
   3   5  -1    0.76    0.10 
   3   5  -1    0.65    0.10 
   3   5  -1    0.64    0.08 
  -3  -5   1    0.60    0.07 
  -3  -5   1    0.59    0.10 
   2   5  -1   10.71    0.49 
   2   5  -1   11.60    0.46 
   2   5  -1   12.38    0.48 
   2   5  -1   11.51    0.44 
   2   5  -1   10.61    0.45 
  -2  -5   1   11.62    0.45 
  -2  -5   1   11.84    0.43 
  -2  -5   1   11.16    0.42 
   1   5  -1   28.45    1.21 
   1   5  -1   33.92    1.21 
   1   5  -1   34.69    1.21 
   1   5  -1   32.54    1.20 
   1   5  -1   34.23    1.19 
   1   5  -1   35.49    1.20 
  -1  -5   1   34.39    1.20 
  -1  -5   1   34.24    1.18 
  -1  -5   1   34.43    1.17 
   0   5  -1   44.65    1.61 
   0   5  -1   40.81    1.60 
   0   5  -1   45.51    1.61 
   0   5  -1   46.75    1.61 
   0   5  -1   44.77    1.62 
   0   5  -1   46.67    1.59 
   0  -5   1   45.56    1.60 
   0  -5   1   47.73    1.59 
   0  -5   1   48.10    1.61 
  -1   5  -1   47.95    1.62 
  -1   5  -1   46.52    1.61 
  -1   5  -1   47.59    1.61 
  -1   5  -1   44.94    1.62 
  -1   5  -1   47.57    1.62 
  -1   5  -1   47.24    1.62 
   1  -5   1   42.55    1.60 
   1  -5   1   41.54    1.61 
   1  -5   1   48.20    1.62 
   1  -5   1   47.43    1.62 
  -2   5  -1    7.69    0.29 
  -2   5  -1    6.68    0.29 
  -2   5  -1    7.39    0.30 
  -2   5  -1    7.41    0.29 
  -2   5  -1    8.16    0.30 
  -2   5  -1    7.43    0.30 
   2  -5   1    8.28    0.30 
   2  -5   1    7.99    0.29 
   2  -5   1    8.05    0.30 
   2  -5   1    6.58    0.27 
  -3   5  -1   24.34    0.86 
  -3   5  -1   23.27    0.85 
  -3   5  -1   23.23    0.84 
  -3   5  -1   24.71    0.85 
  -3   5  -1   24.45    0.85 
  -3   5  -1   23.51    0.84 
   3  -5   1   24.12    0.86 
   3  -5   1   24.24    0.87 
   3  -5   1   22.93    0.85 
  -4   5  -1   22.68    0.80 
  -4   5  -1   22.30    0.80 
  -4   5  -1   21.58    0.80 
  -4   5  -1   22.29    0.79 
  -4   5  -1   22.55    0.82 
   4  -5   1   22.75    0.81 
   4  -5   1   22.75    0.80 
   4  -5   1   21.93    0.83 
  -5   5  -1   19.78    0.69 
  -5   5  -1   16.37    0.62 
  -5   5  -1   16.21    0.61 
  -5   5  -1   16.24    0.62 
  -5   5  -1   17.21    0.62 
   5  -5   1   16.09    0.61 
   5  -5   1   16.72    0.62 
   5  -5   1   17.40    0.66 
  -6   5  -1   19.42    0.71 
  -6   5  -1   19.23    0.70 
  -6   5  -1   19.50    0.71 
   6  -5   1   20.12    0.75 
   6  -5   1   18.98    0.70 
   6  -5   1   19.11    0.71 
  -7   5  -1   47.09    1.64 
  -7   5  -1   46.86    1.64 
  -7   5  -1   45.84    1.64 
  -7   5  -1   45.27    1.63 
   7  -5   1   46.49    1.63 
   7  -5   1   47.31    1.69 
   7  -5   1   46.06    1.65 
  -8   5  -1    0.31    0.06 
  -8   5  -1    0.34    0.07 
  -8   5  -1    0.29    0.06 
  -8   5  -1    0.18    0.07 
   8  -5   1    0.20    0.07 
   8  -5   1    0.30    0.05 
   8  -5   1    0.32    0.06 
  -9   5  -1   10.68    0.43 
  -9   5  -1   10.23    0.41 
  -9   5  -1   10.60    0.43 
  -9   5  -1   10.59    0.43 
   9  -5   1   10.13    0.41 
   9  -5   1   10.27    0.44 
   9  -5   1   10.11    0.39 
   9  -5   1   10.31    0.46 
 -10   5  -1   80.23    2.78 
 -10   5  -1   77.06    2.76 
  10  -5   1   79.41    2.81 
  10  -5   1   78.26    2.74 
 -11   5  -1    1.11    0.16 
  11  -5   1    0.94    0.16 
  11  -5   1    1.27    0.13 
 -12   5  -1    0.45    0.11 
  12  -5   1    0.32    0.14 
 -13   5  -1    0.96    0.15 
  13  -5   1    0.96    0.18 
 -14   5  -1    8.32    0.42 
  14  -5   1    7.90    0.47 
 -15   5  -1    1.42    0.19 
  12   4  -1    7.83    0.35 
  11   4  -1   29.55    1.25 
  11   4  -1   32.32    1.14 
  11   4  -1   30.90    1.20 
  10   4  -1   24.93    0.99 
  10   4  -1   24.15    1.04 
  10   4  -1   26.41    0.95 
 -10  -4   1   25.96    1.00 
   9   4  -1   16.72    0.66 
   9   4  -1   15.13    0.71 
   9   4  -1   16.26    0.63 
  -9  -4   1   15.71    0.67 
   8   4  -1   14.17    0.62 
   8   4  -1   14.30    0.57 
   8   4  -1   14.39    0.58 
   8   4  -1   13.20    0.56 
   8   4  -1   13.46    0.55 
  -8  -4   1   13.80    0.58 
  -8  -4   1   12.82    0.57 
   7   4  -1    5.30    0.32 
   7   4  -1    4.59    0.27 
   7   4  -1    4.88    0.25 
   7   4  -1    5.09    0.26 
   7   4  -1    4.94    0.26 
  -7  -4   1    5.01    0.27 
  -7  -4   1    5.31    0.27 
   6   4  -1   63.22    2.39 
   6   4  -1   65.17    2.38 
   6   4  -1   66.25    2.43 
   6   4  -1   65.54    2.40 
   6   4  -1   69.48    2.39 
  -6  -4   1   68.94    2.40 
  -6  -4   1   75.38    2.41 
   5   4  -1    9.70    0.39 
   5   4  -1   10.02    0.40 
   5   4  -1    9.40    0.43 
   5   4  -1    9.77    0.39 
   5   4  -1    9.99    0.40 
  -5  -4   1    9.56    0.40 
  -5  -4   1    8.68    0.39 
  -5  -4   1    9.96    0.40 
   4   4  -1    0.30    0.06 
   4   4  -1    0.16    0.05 
   4   4  -1    0.30    0.07 
   4   4  -1    0.26    0.06 
   4   4  -1    0.18    0.08 
  -4  -4   1    0.41    0.08 
  -4  -4   1    0.16    0.06 
  -4  -4   1    0.35    0.07 
   3   4  -1  105.30    3.52 
   3   4  -1  103.98    3.47 
   3   4  -1   98.87    3.49 
   3   4  -1   88.81    3.48 
   3   4  -1  101.10    3.50 
  -3  -4   1   98.47    3.49 
  -3  -4   1  102.15    3.47 
  -3  -4   1  104.48    3.50 
   2   4  -1    7.79    0.34 
   2   4  -1    9.01    0.34 
   2   4  -1    8.90    0.34 
   2   4  -1    8.92    0.33 
   2   4  -1    8.43    0.32 
   2   4  -1    8.48    0.36 
  -2  -4   1    8.17    0.31 
  -2  -4   1    8.33    0.34 
   1   4  -1   43.72    1.58 
   1   4  -1   44.68    1.60 
   1   4  -1   45.05    1.58 
   1   4  -1   47.08    1.58 
   1   4  -1   45.44    1.59 
   1   4  -1   45.08    1.59 
  -1  -4   1   46.35    1.58 
  -1  -4   1   43.46    1.57 
  -1  -4   1   44.94    1.56 
   0   4  -1   95.10    3.47 
   0   4  -1   98.26    3.49 
   0   4  -1  100.57    3.48 
   0   4  -1  105.29    3.49 
   0   4  -1  104.57    3.48 
   0  -4   1  108.91    3.48 
   0  -4   1  101.58    3.49 
   0  -4   1  102.33    3.47 
   0  -4   1  104.26    3.49 
   0  -4   1   86.25    3.47 
  -1   4  -1   34.59    1.21 
  -1   4  -1   36.69    1.21 
  -1   4  -1   35.06    1.22 
  -1   4  -1   31.72    1.21 
  -1   4  -1   35.32    1.22 
   1  -4   1   34.29    1.21 
   1  -4   1   32.71    1.21 
   1  -4   1   35.56    1.21 
   1  -4   1   36.42    1.22 
   1  -4   1   33.65    1.20 
  -2   4  -1   25.45    0.89 
  -2   4  -1   25.20    0.89 
  -2   4  -1   23.85    0.88 
  -2   4  -1   26.67    0.89 
  -2   4  -1   24.09    0.88 
  -2   4  -1   25.07    0.89 
   2  -4   1   25.03    0.89 
   2  -4   1   24.72    0.90 
   2  -4   1   25.60    0.89 
   2  -4   1   26.30    0.89 
  -3   4  -1   21.14    0.73 
  -3   4  -1   20.93    0.73 
  -3   4  -1   18.83    0.74 
  -3   4  -1   20.51    0.72 
  -3   4  -1   20.77    0.73 
   3  -4   1   20.63    0.75 
   3  -4   1   20.40    0.73 
   3  -4   1   21.38    0.73 
  -4   4  -1   10.96    0.40 
  -4   4  -1   11.57    0.43 
  -4   4  -1   10.10    0.40 
  -4   4  -1   11.25    0.41 
  -4   4  -1   11.43    0.41 
   4  -4   1   10.75    0.40 
   4  -4   1   10.65    0.43 
   4  -4   1   11.03    0.41 
  -5   4  -1    1.24    0.09 
  -5   4  -1    1.24    0.12 
  -5   4  -1    1.32    0.08 
  -5   4  -1    1.34    0.10 
   5  -4   1    1.20    0.08 
   5  -4   1    1.23    0.10 
  -6   4  -1    2.29    0.13 
  -6   4  -1    2.49    0.13 
  -6   4  -1    2.38    0.12 
  -6   4  -1    2.30    0.13 
   6  -4   1    2.39    0.12 
   6  -4   1    2.50    0.14 
   6  -4   1    2.28    0.17 
   6  -4   1    2.27    0.11 
  -7   4  -1   33.41    1.20 
  -7   4  -1   34.46    1.20 
  -7   4  -1   32.37    1.19 
  -7   4  -1   33.65    1.20 
   7  -4   1   34.24    1.21 
   7  -4   1   33.81    1.18 
   7  -4   1   33.56    1.23 
   7  -4   1   33.14    1.19 
  -8   4  -1   54.25    1.85 
  -8   4  -1   49.18    1.83 
  -8   4  -1   52.13    1.85 
  -8   4  -1   53.40    1.85 
   8  -4   1   53.73    1.83 
   8  -4   1   53.11    1.85 
   8  -4   1   48.76    1.83 
   8  -4   1   53.12    1.88 
  -9   4  -1   24.11    0.95 
  -9   4  -1   27.08    0.95 
  -9   4  -1   25.12    0.95 
   9  -4   1   27.06    0.94 
   9  -4   1   24.76    0.98 
   9  -4   1   25.22    0.93 
 -10   4  -1    1.40    0.16 
  10  -4   1    1.68    0.20 
  10  -4   1    1.91    0.15 
 -11   4  -1    1.47    0.17 
  11  -4   1    1.56    0.15 
  11  -4   1    1.43    0.21 
 -12   4  -1   27.38    1.05 
  12  -4   1   27.73    1.09 
 -13   4  -1    7.89    0.40 
  13  -4   1    7.61    0.44 
 -14   4  -1   25.16    1.01 
  14  -4   1   25.53    1.05 
 -15   4  -1   11.88    0.56 
  13   3  -1   12.17    0.46 
  13   3  -1   11.04    0.57 
  12   3  -1    4.56    0.37 
  12   3  -1    5.22    0.35 
  12   3  -1    5.05    0.25 
  11   3  -1   11.10    0.45 
  11   3  -1   10.66    0.51 
  11   3  -1   10.80    0.56 
 -11  -3   1   10.72    0.51 
  10   3  -1    8.87    0.48 
  10   3  -1    8.68    0.43 
  10   3  -1    8.98    0.39 
 -10  -3   1    9.20    0.44 
   9   3  -1   35.55    1.33 
   9   3  -1   36.18    1.30 
   9   3  -1   33.88    1.38 
   9   3  -1   34.80    1.32 
  -9  -3   1   38.01    1.39 
  -9  -3   1   37.51    1.34 
   8   3  -1   50.66    1.84 
   8   3  -1   51.77    1.88 
   8   3  -1   50.88    1.83 
   8   3  -1   50.62    1.81 
   8   3  -1   51.44    1.84 
  -8  -3   1   50.61    1.84 
  -8  -3   1   51.38    1.85 
   7   3  -1    6.92    0.32 
   7   3  -1    7.02    0.32 
   7   3  -1    7.34    0.36 
   7   3  -1    6.54    0.30 
   7   3  -1    6.84    0.32 
  -7  -3   1    6.71    0.32 
  -7  -3   1    7.10    0.33 
   6   3  -1    3.15    0.18 
   6   3  -1    3.15    0.23 
   6   3  -1    3.66    0.20 
   6   3  -1    3.68    0.20 
   6   3  -1    3.76    0.20 
  -6  -3   1    3.57    0.20 
  -6  -3   1    3.17    0.19 
   5   3  -1   44.33    1.61 
   5   3  -1   45.59    1.65 
   5   3  -1   44.94    1.60 
   5   3  -1   43.70    1.61 
   5   3  -1   46.84    1.62 
  -5  -3   1   50.20    1.65 
  -5  -3   1   45.06    1.62 
  -5  -3   1   42.84    1.62 
   4   3  -1  123.29    4.30 
   4   3  -1  115.36    4.30 
   4   3  -1  125.83    4.34 
   4   3  -1  127.33    4.32 
   4   3  -1  128.76    4.31 
  -4  -3   1  122.11    4.31 
  -4  -3   1  127.86    4.32 
  -4  -3   1  124.44    4.32 
   3   3  -1   24.16    0.87 
   3   3  -1   23.94    0.86 
   3   3  -1   24.18    0.87 
   3   3  -1   24.68    0.87 
   3   3  -1   25.35    0.88 
  -3  -3   1   22.93    0.87 
   2   3  -1   47.63    1.66 
   2   3  -1   46.33    1.67 
   2   3  -1   47.19    1.67 
   2   3  -1   47.72    1.67 
  -2  -3   1   47.17    1.66 
  -2  -3   1   48.11    1.67 
  -2  -3   1   48.95    1.67 
  -2  -3   1   48.96    1.67 
   1   3  -1   19.04    0.68 
   1   3  -1   20.29    0.68 
   1   3  -1   18.75    0.68 
   1   3  -1   18.71    0.68 
  -1  -3   1   17.67    0.67 
  -1  -3   1   18.73    0.66 
  -1  -3   1   18.01    0.67 
  -1  -3   1   19.46    0.66 
   0   3  -1   12.51    0.43 
   0   3  -1   12.26    0.42 
   0   3  -1   12.61    0.44 
   0   3  -1   12.22    0.44 
   0   3  -1   12.04    0.44 
   0  -3   1   12.25    0.43 
   0  -3   1   10.25    0.42 
   0  -3   1   11.64    0.43 
   0  -3   1   12.34    0.44 
  -1   3  -1   68.81    2.34 
  -1   3  -1   67.68    2.34 
  -1   3  -1   70.79    2.34 
  -1   3  -1   59.23    2.34 
  -1   3  -1   74.84    2.33 
   1  -3   1   70.47    2.34 
   1  -3   1   68.99    2.34 
   1  -3   1   68.72    2.34 
   1  -3   1   60.17    2.34 
  -2   3  -1  416.74   14.73 
  -2   3  -1  429.42   14.75 
  -2   3  -1  360.72   14.76 
  -2   3  -1  443.24   14.74 
  -2   3  -1  450.74   14.71 
   2  -3   1  428.71   14.73 
   2  -3   1  412.89   14.72 
   2  -3   1  465.87   14.81 
   2  -3   1  440.40   14.73 
  -3   3  -1    4.59    0.19 
  -3   3  -1    4.95    0.19 
  -3   3  -1    5.10    0.20 
  -3   3  -1    4.89    0.18 
   3  -3   1    5.20    0.19 
   3  -3   1    5.04    0.20 
   3  -3   1    4.89    0.22 
   3  -3   1    4.71    0.19 
  -4   3  -1   27.84    0.97 
  -4   3  -1   26.70    0.95 
  -4   3  -1   26.23    0.94 
  -4   3  -1   27.25    0.93 
   4  -3   1   26.26    0.93 
   4  -3   1   26.39    0.94 
   4  -3   1   27.19    0.95 
   4  -3   1   26.54    0.97 
  -5   3  -1   30.58    1.09 
  -5   3  -1   31.59    1.09 
  -5   3  -1   29.91    1.07 
  -5   3  -1   30.83    1.12 
  -5   3  -1   29.44    1.08 
   5  -3   1   31.55    1.07 
   5  -3   1   30.61    1.08 
  -6   3  -1   36.82    1.35 
  -6   3  -1   37.61    1.35 
  -6   3  -1   38.74    1.35 
  -6   3  -1   37.39    1.33 
   6  -3   1   38.04    1.34 
   6  -3   1   38.87    1.34 
   6  -3   1   38.99    1.37 
  -7   3  -1   75.94    2.53 
  -7   3  -1   70.76    2.52 
  -7   3  -1   69.58    2.53 
  -7   3  -1   71.97    2.53 
   7  -3   1   75.11    2.52 
   7  -3   1   72.18    2.55 
   7  -3   1   70.44    2.52 
  -8   3  -1   76.15    2.74 
  -8   3  -1   77.70    2.74 
  -8   3  -1   79.21    2.74 
   8  -3   1   82.75    2.74 
   8  -3   1   78.24    2.72 
   8  -3   1   74.75    2.76 
  -9   3  -1   92.73    3.24 
  -9   3  -1   91.13    3.24 
  -9   3  -1   94.20    3.25 
   9  -3   1   93.95    3.24 
   9  -3   1   89.74    3.22 
   9  -3   1   93.04    3.27 
 -10   3  -1   36.74    1.34 
  10  -3   1   35.13    1.36 
  10  -3   1   37.73    1.34 
 -11   3  -1    1.25    0.16 
  11  -3   1    1.16    0.20 
  11  -3   1    1.44    0.17 
 -12   3  -1   33.01    1.27 
  12  -3   1   35.07    1.27 
  12  -3   1   33.44    1.31 
 -13   3  -1    8.05    0.41 
  13  -3   1    7.74    0.45 
 -14   3  -1    0.13    0.10 
  14  -3   1    0.05    0.15 
 -15   3  -1    1.03    0.17 
  13   2  -1    2.47    0.16 
  13   2  -1    2.05    0.28 
  13   2  -1    2.56    0.30 
  12   2  -1    0.24    0.13 
  12   2  -1    0.04    0.13 
  12   2  -1    0.00    0.07 
 -12  -2   1    0.09    0.10 
  11   2  -1    1.54    0.24 
  11   2  -1    1.55    0.22 
  11   2  -1    1.84    0.16 
 -11  -2   1    1.65    0.19 
  10   2  -1   83.35    2.98 
  10   2  -1   89.15    3.03 
  10   2  -1   82.42    3.02 
  10   2  -1   85.32    3.06 
   9   2  -1   44.46    1.55 
   9   2  -1   41.24    1.56 
   9   2  -1   42.04    1.50 
   9   2  -1   41.69    1.52 
   9   2  -1   41.45    1.49 
  -9  -2   1   38.69    1.52 
   8   2  -1    3.35    0.20 
   8   2  -1    3.23    0.21 
   8   2  -1    2.97    0.18 
   8   2  -1    3.01    0.18 
   8   2  -1    2.79    0.23 
  -8  -2   1    2.53    0.18 
  -8  -2   1    3.24    0.20 
   7   2  -1   52.06    1.74 
   7   2  -1   48.96    1.75 
   7   2  -1   46.93    1.79 
   7   2  -1   50.83    1.76 
   7   2  -1   52.00    1.76 
  -7  -2   1   42.42    1.75 
  -7  -2   1   51.09    1.77 
   6   2  -1  122.06    4.35 
   6   2  -1  123.01    4.39 
   6   2  -1  121.74    4.36 
   6   2  -1  126.22    4.36 
   6   2  -1  128.30    4.36 
  -6  -2   1  124.36    4.36 
  -6  -2   1  132.19    4.37 
   5   2  -1    3.29    0.17 
   5   2  -1    3.30    0.16 
   5   2  -1    3.02    0.17 
   5   2  -1    3.16    0.17 
   5   2  -1    3.33    0.20 
  -5  -2   1    3.36    0.17 
  -5  -2   1    3.53    0.18 
   4   2  -1   19.33    0.70 
   4   2  -1   19.08    0.70 
   4   2  -1   18.92    0.70 
   4   2  -1   20.06    0.71 
  -4  -2   1   19.43    0.70 
  -4  -2   1   19.27    0.71 
  -4  -2   1   18.76    0.70 
   3   2  -1  255.85    8.93 
   3   2  -1  260.58    8.96 
   3   2  -1  252.16    8.94 
   3   2  -1  255.48    8.90 
   3   2  -1  251.40    8.90 
  -3  -2   1  265.83    8.98 
  -3  -2   1  253.44    8.95 
  -3  -2   1  273.02    8.98 
  -3  -2   1  259.25    8.90 
   2   2  -1    4.98    0.20 
   2   2  -1    4.88    0.21 
   2   2  -1    5.21    0.19 
   2   2  -1    5.13    0.20 
   2   2  -1    5.04    0.20 
  -2  -2   1    5.29    0.21 
  -2  -2   1    5.02    0.20 
  -2  -2   1    4.99    0.20 
   1   2  -1    4.65    0.18 
   1   2  -1    5.65    0.20 
   1   2  -1    4.73    0.19 
   1   2  -1    4.46    0.19 
  -1  -2   1    4.92    0.19 
   0   2  -1  204.52    7.74 
   0   2  -1  232.45    7.77 
   0   2  -1  232.11    7.77 
   0   2  -1  222.36    7.74 
   0  -2   1  212.88    7.74 
   0  -2   1  232.92    7.76 
   0  -2   1  235.68    7.77 
  -1   2  -1   48.99    1.88 
  -1   2  -1   53.62    1.88 
  -1   2  -1   54.12    1.88 
  -1   2  -1   56.07    1.88 
   1  -2   1   55.39    1.88 
   1  -2   1   58.30    1.88 
   1  -2   1   54.06    1.88 
   1  -2   1   55.60    1.89 
  -2   2  -1    7.03    0.28 
  -2   2  -1    6.92    0.25 
  -2   2  -1    7.36    0.26 
  -2   2  -1    7.05    0.26 
   2  -2   1    6.95    0.25 
   2  -2   1    7.11    0.25 
   2  -2   1    7.31    0.25 
   2  -2   1    6.90    0.26 
  -3   2  -1   19.41    0.71 
  -3   2  -1   19.80    0.68 
  -3   2  -1   19.66    0.69 
  -3   2  -1   19.89    0.69 
  -3   2  -1   19.61    0.69 
   3  -2   1   18.69    0.70 
   3  -2   1   19.12    0.68 
   3  -2   1   19.21    0.68 
   3  -2   1   20.02    0.68 
  -4   2  -1    0.39    0.05 
  -4   2  -1    0.44    0.06 
  -4   2  -1    0.45    0.07 
  -4   2  -1    0.35    0.05 
  -4   2  -1    0.30    0.04 
   4  -2   1    0.31    0.05 
   4  -2   1    0.31    0.05 
   4  -2   1    0.35    0.06 
  -5   2  -1    0.71    0.10 
  -5   2  -1    0.88    0.07 
  -5   2  -1    0.79    0.07 
  -5   2  -1    0.75    0.08 
  -5   2  -1    0.78    0.08 
   5  -2   1    0.77    0.07 
   5  -2   1    0.79    0.10 
   5  -2   1    0.82    0.08 
  -6   2  -1   77.58    2.88 
  -6   2  -1   81.04    2.88 
  -6   2  -1   81.99    2.88 
   6  -2   1   83.88    2.90 
   6  -2   1   85.09    2.87 
   6  -2   1   87.03    2.89 
  -7   2  -1   33.08    1.19 
  -7   2  -1   32.87    1.18 
  -7   2  -1   32.58    1.18 
   7  -2   1   33.33    1.19 
   7  -2   1   32.49    1.21 
   7  -2   1   33.40    1.17 
  -8   2  -1    2.86    0.18 
  -8   2  -1    2.90    0.18 
  -8   2  -1    3.18    0.18 
   8  -2   1    2.96    0.16 
   8  -2   1    3.10    0.21 
   8  -2   1    2.88    0.18 
  -9   2  -1  147.37    5.05 
  -9   2  -1  132.94    5.06 
  -9   2  -1  144.96    5.05 
   9  -2   1  147.64    5.03 
   9  -2   1  147.62    5.07 
   9  -2   1  149.43    5.06 
 -10   2  -1   31.40    1.17 
  10  -2   1   31.07    1.19 
  10  -2   1   31.98    1.18 
 -11   2  -1    6.59    0.34 
  11  -2   1    7.14    0.36 
  11  -2   1    6.93    0.38 
 -12   2  -1    3.57    0.25 
  12  -2   1    3.61    0.26 
  12  -2   1    3.49    0.30 
 -13   2  -1    0.56    0.12 
  13  -2   1    0.70    0.19 
  13  -2   1    0.61    0.17 
 -14   2  -1    1.30    0.18 
  14  -2   1    0.96    0.20 
  14   1  -1    2.47    0.30 
  14   1  -1    2.52    0.30 
  13   1  -1    3.71    0.32 
  13   1  -1    3.99    0.33 
  13   1  -1    3.58    0.18 
  12   1  -1   26.03    1.08 
  12   1  -1   29.50    1.12 
  12   1  -1   27.18    1.00 
  11   1  -1   22.01    0.81 
  11   1  -1   19.84    0.78 
  11   1  -1   21.87    0.87 
  11   1  -1   20.20    0.84 
  10   1  -1    5.80    0.28 
  10   1  -1    5.79    0.33 
  10   1  -1    6.00    0.35 
  10   1  -1    6.05    0.28 
   9   1  -1   17.49    0.70 
   9   1  -1   17.04    0.68 
   9   1  -1   18.38    0.67 
   9   1  -1   17.28    0.66 
   9   1  -1   17.71    0.73 
  -9  -1   1   17.05    0.69 
   8   1  -1    7.67    0.36 
   8   1  -1    7.58    0.33 
   8   1  -1    7.43    0.34 
   8   1  -1    7.11    0.32 
   8   1  -1    7.97    0.38 
  -8  -1   1    7.91    0.35 
   7   1  -1    0.07    0.05 
   7   1  -1    0.17    0.08 
   7   1  -1    0.07    0.05 
   7   1  -1    0.05    0.06 
   7   1  -1    0.05    0.07 
  -7  -1   1    0.02    0.03 
  -7  -1   1    0.16    0.06 
   6   1  -1    1.04    0.13 
   6   1  -1    0.94    0.11 
   6   1  -1    1.15    0.11 
   6   1  -1    0.81    0.09 
   6   1  -1    0.94    0.09 
  -6  -1   1    0.89    0.10 
   5   1  -1   79.07    2.73 
   5   1  -1   77.37    2.74 
   5   1  -1   79.57    2.74 
   5   1  -1   81.15    2.74 
  -5  -1   1   78.54    2.76 
  -5  -1   1   79.72    2.74 
  -5  -1   1   75.43    2.74 
   4   1  -1    1.83    0.10 
   4   1  -1    2.02    0.11 
   4   1  -1    1.93    0.11 
   4   1  -1    1.82    0.11 
   4   1  -1    1.92    0.11 
  -4  -1   1    2.07    0.11 
  -4  -1   1    2.02    0.11 
  -4  -1   1    1.90    0.12 
  -4  -1   1    1.52    0.10 
   3   1  -1   18.19    0.68 
   3   1  -1   18.35    0.68 
   3   1  -1   18.67    0.68 
   3   1  -1   19.30    0.67 
  -3  -1   1   19.55    0.68 
  -3  -1   1   19.28    0.68 
   2   1  -1  534.18   18.41 
   2   1  -1  567.80   18.43 
   2   1  -1  519.92   18.40 
   2   1  -1  559.56   18.44 
  -2  -1   1  478.12   18.41 
  -2  -1   1  535.41   18.41 
  -2  -1   1  542.60   18.42 
   1   1  -1  309.88   11.11 
   1   1  -1  332.08   11.12 
   1   1  -1  299.23   11.11 
   1   1  -1  329.66   11.12 
  -1  -1   1  342.98   11.12 
  -1  -1   1  319.88   11.11 
  -1  -1   1  327.10   11.12 
  -1  -1   1  317.80   11.11 
   0   1  -1    2.61    0.09 
   0  -1   1    2.58    0.09 
  -1   1  -1    3.52    0.14 
  -1   1  -1    3.56    0.13 
   1  -1   1    3.65    0.14 
   1  -1   1    3.71    0.14 
  -2   1  -1   47.09    1.69 
  -2   1  -1   47.89    1.68 
  -2   1  -1   50.67    1.69 
  -2   1  -1   49.60    1.68 
   2  -1   1   49.46    1.70 
   2  -1   1   49.01    1.68 
   2  -1   1   47.87    1.68 
   2  -1   1   48.60    1.69 
  -3   1  -1   86.32    3.17 
  -3   1  -1   93.00    3.18 
  -3   1  -1   89.89    3.18 
  -3   1  -1   95.67    3.18 
  -3   1  -1   90.91    3.17 
   3  -1   1   94.08    3.17 
   3  -1   1   94.23    3.17 
   3  -1   1   93.00    3.19 
   3  -1   1   91.88    3.18 
  -4   1  -1  216.94    7.56 
  -4   1  -1  214.29    7.56 
  -4   1  -1  242.45    7.60 
  -4   1  -1  218.76    7.59 
   4  -1   1  225.74    7.64 
   4  -1   1  207.33    7.57 
   4  -1   1  212.60    7.56 
  -5   1  -1   75.66    2.58 
  -5   1  -1   77.09    2.58 
  -5   1  -1   75.86    2.58 
   5  -1   1   73.13    2.59 
   5  -1   1   72.82    2.59 
   5  -1   1   72.16    2.55 
   5  -1   1   73.54    2.57 
   5  -1   1   72.15    2.55 
  -6   1  -1   79.32    2.64 
  -6   1  -1   79.48    2.64 
  -6   1  -1   70.45    2.64 
   6  -1   1   78.35    2.66 
   6  -1   1   73.54    2.63 
   6  -1   1   73.99    2.60 
   6  -1   1   74.14    2.60 
   6  -1   1   75.80    2.65 
  -7   1  -1  106.52    3.92 
  -7   1  -1  109.72    3.92 
  -7   1  -1  118.49    3.92 
   7  -1   1  111.31    3.94 
   7  -1   1  115.16    3.91 
   7  -1   1  115.42    3.94 
  -8   1  -1    0.36    0.07 
  -8   1  -1    0.33    0.08 
  -8   1  -1    0.44    0.08 
   8  -1   1    0.47    0.09 
   8  -1   1    0.48    0.11 
   8  -1   1    0.39    0.07 
  -9   1  -1   66.81    2.36 
   9  -1   1   67.33    2.38 
   9  -1   1   64.69    2.37 
 -10   1  -1    6.85    0.34 
  10  -1   1    6.62    0.35 
  10  -1   1    6.81    0.36 
 -11   1  -1   21.97    0.85 
  11  -1   1   21.45    0.88 
  11  -1   1   21.78    0.88 
 -12   1  -1    0.85    0.13 
  12  -1   1    0.77    0.17 
  12  -1   1    1.44    0.21 
 -13   1  -1   25.91    1.04 
  13  -1   1   26.55    1.06 
  13  -1   1   26.44    1.07 
 -14   1  -1    3.53    0.29 
  14  -1   1    3.83    0.34 
  14   0  -1   16.52    0.76 
  14   0  -1   16.28    0.75 
  13   0  -1    6.60    0.40 
  13   0  -1    6.41    0.26 
  13   0  -1    5.99    0.38 
 -13   0   1    6.05    0.36 
  12   0  -1    5.52    0.35 
  12   0  -1    5.74    0.25 
  12   0  -1    5.55    0.36 
 -12   0   1    5.13    0.32 
  11   0  -1   29.65    1.05 
  11   0  -1   27.81    1.04 
  11   0  -1   29.99    1.12 
  11   0  -1   29.13    1.13 
 -11   0   1   27.68    1.10 
  10   0  -1    4.96    0.24 
  10   0  -1    5.14    0.31 
  10   0  -1    5.01    0.24 
  10   0  -1    4.64    0.29 
 -10   0   1    4.66    0.27 
   9   0  -1    3.19    0.21 
   9   0  -1    3.68    0.19 
   9   0  -1    3.53    0.19 
   9   0  -1    3.42    0.24 
   9   0  -1    3.38    0.23 
  -9   0   1    3.51    0.22 
  -9   0   1    3.52    0.22 
   8   0  -1  147.22    5.04 
   8   0  -1  149.60    5.06 
   8   0  -1  149.26    5.07 
   8   0  -1  138.88    5.03 
   8   0  -1  147.52    5.02 
  -8   0   1  137.82    5.05 
  -8   0   1  145.82    5.05 
   7   0  -1  181.07    6.21 
   7   0  -1  175.31    6.22 
   7   0  -1  183.56    6.24 
   7   0  -1  182.50    6.25 
   7   0  -1  175.59    6.22 
  -7   0   1  184.66    6.23 
  -7   0   1  176.66    6.23 
   6   0  -1    1.15    0.12 
   6   0  -1    0.87    0.10 
   6   0  -1    0.76    0.09 
   6   0  -1    1.05    0.09 
  -6   0   1    0.75    0.10 
  -6   0   1    0.65    0.09 
  -6   0   1    1.03    0.10 
   5   0  -1  189.91    6.46 
   5   0  -1  191.89    6.48 
   5   0  -1  178.09    6.45 
   5   0  -1  192.25    6.45 
  -5   0   1  191.15    6.48 
  -5   0   1  183.20    6.46 
  -5   0   1  183.88    6.46 
   4   0  -1  319.48   10.86 
   4   0  -1  298.87   11.53 
   4   0  -1  299.93   10.86 
   4   0  -1  317.78   10.94 
   4   0  -1  316.45   10.92 
  -4   0   1  309.82   10.90 
  -4   0   1  345.61   10.96 
  -4   0   1  318.10   10.86 
   3   0  -1  120.75    4.31 
   3   0  -1  125.36    4.32 
   3   0  -1  124.22    4.31 
   3   0  -1  125.70    4.31 
  -3   0   1  125.04    4.32 
  -3   0   1  129.08    4.31 
  -3   0   1  124.60    4.31 
   2   0  -1   48.56    1.62 
   2   0  -1   47.47    1.62 
   2   0  -1   47.45    1.63 
  -2   0   1   47.01    1.62 
  -2   0   1   45.45    1.63 
  -2   0   1   44.76    1.62 
   1   0  -1   52.07    1.78 
   1   0  -1   52.31    1.77 
   1   0  -1   51.38    1.77 
   1   0  -1   50.88    1.78 
  -1   0   1   52.11    1.77 
  -1   0   1   50.37    1.77 
  -1   0   1   50.96    1.78 
  -1   0   1   51.86    1.79 
   0   0  -1    5.16    0.18 
   0   0  -1    4.78    0.18 
   0   0   1    5.31    0.18 
   0   0   1    5.23    0.18 
   0   0   1    4.90    0.18 
   0   0   1    5.02    0.19 
  -1   0  -1  204.45    6.98 
  -1   0  -1  200.64    6.95 
  -1   0  -1  211.42    6.95 
  -1   0  -1  199.50    6.99 
   1   0   1  201.59    6.94 
   1   0   1  210.21    7.00 
   1   0   1  198.29    6.98 
   1   0   1  185.49    6.94 
  -2   0  -1  125.12    4.42 
  -2   0  -1  113.80    4.42 
  -2   0  -1  130.53    4.41 
  -2   0  -1  136.44    4.44 
  -2   0  -1  130.96    4.42 
   2   0   1  117.60    4.41 
   2   0   1  127.52    4.42 
   2   0   1  130.20    4.56 
   2   0   1  135.83    4.41 
   2   0   1  136.09    4.42 
   2   0   1  127.18    4.43 
  -3   0  -1   74.39    2.58 
  -3   0  -1   75.14    2.59 
  -3   0  -1   66.63    2.58 
  -3   0  -1   76.63    2.60 
  -3   0  -1   77.73    2.59 
   3   0   1   75.47    2.58 
   3   0   1   68.07    2.57 
   3   0   1   77.74    2.58 
   3   0   1   76.09    2.59 
   3   0   1   80.14    2.60 
   3   0   1   77.36    2.57 
   3   0   1   70.50    2.57 
  -4   0  -1   18.84    0.70 
  -4   0  -1   18.70    0.69 
  -4   0  -1   19.28    0.69 
  -4   0  -1   18.22    0.69 
   4   0   1   18.70    0.70 
   4   0   1   19.48    0.67 
   4   0   1   18.16    0.67 
   4   0   1   20.99    0.71 
   4   0   1   20.77    0.69 
   4   0   1   18.23    0.67 
  -5   0  -1    7.59    0.32 
  -5   0  -1    8.26    0.32 
  -5   0  -1    7.66    0.32 
   5   0   1    8.39    0.31 
   5   0   1    7.71    0.34 
   5   0   1    7.88    0.29 
   5   0   1    8.08    0.29 
   5   0   1    7.74    0.29 
   5   0   1    7.50    0.33 
  -6   0  -1    0.14    0.05 
  -6   0  -1    0.20    0.06 
  -6   0  -1    0.09    0.05 
   6   0   1    0.19    0.07 
   6   0   1    0.29    0.04 
   6   0   1    0.11    0.03 
   6   0   1    0.11    0.05 
   6   0   1    0.19    0.04 
   6   0   1    0.19    0.07 
  -7   0  -1   55.81    1.99 
  -7   0  -1   54.04    1.98 
  -7   0  -1   58.46    1.99 
   7   0   1   54.21    2.01 
   7   0   1   55.37    1.95 
   7   0   1   57.04    2.00 
   7   0   1   54.33    1.95 
   7   0   1   59.85    1.98 
  -8   0  -1   85.46    2.95 
  -8   0  -1   83.74    2.95 
  -8   0  -1   90.90    2.95 
   8   0   1   82.08    2.93 
   8   0   1   80.28    2.89 
   8   0   1   83.49    2.97 
   8   0   1   80.93    2.89 
   8   0   1   83.68    2.96 
  -9   0  -1   -0.04    0.07 
   9   0   1    0.02    0.08 
   9   0   1    0.01    0.10 
 -10   0  -1    5.34    0.30 
  10   0   1    5.43    0.33 
  10   0   1    5.93    0.33 
 -11   0  -1   11.62    0.52 
  11   0   1   12.41    0.55 
  11   0   1   11.07    0.55 
 -12   0  -1    5.64    0.33 
  12   0   1    6.01    0.37 
  12   0   1    5.89    0.37 
 -13   0  -1    0.21    0.12 
  13   0   1    0.13    0.13 
  13   0   1    0.38    0.16 
 -14   0  -1    0.19    0.12 
  14   0   1    0.38    0.17 
  14  -1  -1   26.92    1.09 
 -14   1   1   26.44    1.06 
  13  -1  -1   48.41    1.83 
  13  -1  -1   48.91    1.82 
 -13   1   1   49.28    1.81 
  12  -1  -1    4.62    0.21 
  12  -1  -1    4.60    0.31 
  12  -1  -1    3.99    0.31 
 -12   1   1    4.97    0.29 
  11  -1  -1  123.54    4.38 
  11  -1  -1  125.83    4.38 
  11  -1  -1  124.24    4.31 
 -11   1   1  123.43    4.36 
  10  -1  -1  177.85    6.19 
  10  -1  -1  180.31    6.25 
  10  -1  -1  170.82    6.24 
  10  -1  -1  172.58    6.19 
 -10   1   1  194.13    6.29 
 -10   1   1  179.81    6.23 
   9  -1  -1    6.36    0.30 
   9  -1  -1    6.00    0.33 
   9  -1  -1    6.82    0.33 
   9  -1  -1    6.57    0.28 
   9  -1  -1    6.93    0.28 
  -9   1   1    6.19    0.31 
  -9   1   1    6.87    0.32 
   8  -1  -1    9.83    0.38 
   8  -1  -1    9.54    0.38 
   8  -1  -1    9.13    0.41 
   8  -1  -1   10.07    0.40 
   8  -1  -1    9.47    0.41 
  -8   1   1    9.46    0.40 
  -8   1   1    9.87    0.41 
   7  -1  -1   70.14    2.46 
   7  -1  -1   70.94    2.46 
   7  -1  -1   70.92    2.47 
  -7   1   1   69.70    2.48 
  -7   1   1   69.92    2.47 
  -7   1   1   71.53    2.48 
   6  -1  -1  214.01    7.27 
   6  -1  -1  207.55    7.27 
   6  -1  -1  213.77    7.30 
   6  -1  -1  213.25    7.26 
  -6   1   1  210.73    7.28 
  -6   1   1  208.11    7.27 
  -6   1   1  208.66    7.28 
   5  -1  -1    0.17    0.04 
   5  -1  -1    0.24    0.07 
   5  -1  -1    0.15    0.05 
   5  -1  -1    0.22    0.05 
  -5   1   1    0.17    0.04 
  -5   1   1    0.25    0.07 
  -5   1   1    0.16    0.04 
  -5   1   1    0.31    0.05 
   4  -1  -1    0.40    0.06 
   4  -1  -1    0.24    0.04 
   4  -1  -1    0.26    0.06 
   4  -1  -1    0.26    0.04 
  -4   1   1    0.29    0.06 
  -4   1   1    0.27    0.05 
  -4   1   1    0.20    0.04 
  -4   1   1    0.26    0.04 
   3  -1  -1   87.22    2.98 
   3  -1  -1   85.84    2.99 
   3  -1  -1   87.68    2.98 
   3  -1  -1   85.73    2.98 
  -3   1   1   85.17    2.98 
  -3   1   1   86.23    2.98 
  -3   1   1   85.65    2.99 
   2  -1  -1   99.88    3.41 
   2  -1  -1   97.93    3.41 
   2  -1  -1  100.24    3.41 
   2  -1  -1   92.82    3.41 
   2  -1  -1   94.71    3.41 
   2  -1  -1  101.28    3.43 
  -2   1   1   99.24    3.42 
  -2   1   1  106.39    3.44 
  -2   1   1   98.06    3.41 
  -2   1   1  100.36    3.42 
   1  -1  -1  118.82    4.26 
   1  -1  -1  126.74    4.28 
  -1   1   1  120.68    4.26 
  -1   1   1  127.50    4.27 
  -1   1   1  125.86    4.30 
  -1   1   1  122.53    4.26 
  -1   1   1  119.90    4.28 
  -1   1   1  124.62    4.28 
  -1   1   1  126.73    4.28 
   0  -1  -1  171.41    5.57 
   0  -1  -1  164.79    5.57 
   0  -1  -1  154.83    5.59 
   0  -1  -1  165.40    5.60 
   0  -1  -1  162.79    5.57 
   0  -1  -1  142.26    5.56 
   0   1   1  157.97    5.54 
   0   1   1  162.47    5.55 
   0   1   1  163.81    5.57 
   0   1   1  161.33    5.59 
   0   1   1  175.29    5.59 
   0   1   1  151.11    5.60 
   0   1   1  160.49    5.58 
  -1  -1  -1    6.04    0.23 
  -1  -1  -1    6.35    0.24 
  -1  -1  -1    6.24    0.24 
  -1  -1  -1    6.55    0.24 
   1   1   1    6.51    0.23 
   1   1   1    5.93    0.24 
   1   1   1    6.07    0.23 
   1   1   1    6.52    0.24 
   1   1   1    6.05    0.23 
   1   1   1    6.30    0.24 
  -2  -1  -1   12.26    0.46 
  -2  -1  -1   11.64    0.45 
  -2  -1  -1   12.47    0.45 
  -2  -1  -1   13.11    0.47 
  -2  -1  -1   12.02    0.46 
   2   1   1   12.46    0.45 
   2   1   1   12.69    0.46 
   2   1   1   13.35    0.47 
   2   1   1   12.84    0.46 
   2   1   1   12.66    0.45 
   2   1   1   12.43    0.45 
  -3  -1  -1    9.82    0.38 
  -3  -1  -1    9.93    0.38 
  -3  -1  -1   10.38    0.37 
  -3  -1  -1    9.94    0.37 
  -3  -1  -1    9.82    0.39 
   3   1   1    9.86    0.38 
   3   1   1    9.11    0.36 
   3   1   1    9.60    0.39 
   3   1   1   10.26    0.36 
   3   1   1   10.59    0.37 
  -4  -1  -1  184.39    6.13 
  -4  -1  -1  176.47    6.13 
  -4  -1  -1  187.62    6.13 
  -4  -1  -1  185.41    6.14 
   4   1   1  170.20    6.11 
   4   1   1  175.10    6.12 
   4   1   1  180.82    6.14 
   4   1   1  181.37    6.15 
   4   1   1  156.94    6.11 
  -5  -1  -1  115.97    4.03 
  -5  -1  -1  113.32    4.03 
  -5  -1  -1  117.01    4.04 
   5   1   1  115.94    4.04 
   5   1   1  123.73    4.02 
   5   1   1  110.08    4.01 
   5   1   1  116.85    4.06 
   5   1   1  116.43    4.03 
  -6  -1  -1   46.66    1.64 
  -6  -1  -1   46.82    1.63 
  -6  -1  -1   44.95    1.64 
   6   1   1   46.72    1.65 
   6   1   1   45.81    1.60 
   6   1   1   46.95    1.63 
   6   1   1   42.42    1.61 
   6   1   1   47.35    1.61 
   6   1   1   45.98    1.67 
  -7  -1  -1   62.93    2.24 
  -7  -1  -1   66.39    2.27 
  -7  -1  -1   65.95    2.25 
   7   1   1   62.13    2.21 
   7   1   1   63.51    2.23 
   7   1   1   59.89    2.20 
   7   1   1   62.06    2.25 
   7   1   1   61.22    2.20 
   7   1   1   66.30    2.28 
  -8  -1  -1   63.93    2.25 
  -8  -1  -1   62.64    2.25 
   8   1   1   63.05    2.20 
   8   1   1   68.00    2.29 
   8   1   1   64.81    2.26 
   8   1   1   55.30    2.19 
   8   1   1   65.56    2.24 
  -9  -1  -1   10.91    0.48 
   9   1   1   11.71    0.50 
   9   1   1   10.53    0.51 
   9   1   1   10.94    0.41 
 -10  -1  -1    0.67    0.12 
  10   1   1    0.78    0.14 
  10   1   1    0.70    0.14 
 -11  -1  -1    0.07    0.10 
  11   1   1    0.15    0.12 
  11   1   1    0.25    0.13 
 -12  -1  -1   31.53    1.23 
  12   1   1   31.99    1.27 
  12   1   1   31.98    1.25 
 -13  -1  -1    5.24    0.35 
  13   1   1    5.40    0.39 
  13   1   1    5.81    0.40 
  15  -2  -1    1.73    0.28 
 -15   2   1    1.12    0.17 
  14  -2  -1    7.79    0.47 
 -14   2   1    7.95    0.42 
  13  -2  -1   13.44    0.64 
  13  -2  -1   14.42    0.62 
 -13   2   1   13.88    0.61 
  12  -2  -1   51.28    1.91 
  12  -2  -1   52.68    1.93 
  12  -2  -1   52.02    1.82 
 -12   2   1   52.83    1.90 
  11  -2  -1   42.72    1.51 
  11  -2  -1   43.46    1.59 
  11  -2  -1   40.45    1.57 
 -11   2   1   44.25    1.57 
  10  -2  -1   70.80    2.58 
  10  -2  -1   69.40    2.56 
  10  -2  -1   74.48    2.58 
  10  -2  -1   73.33    2.52 
 -10   2   1   73.08    2.57 
 -10   2   1   71.62    2.56 
   9  -2  -1    2.22    0.14 
   9  -2  -1    2.33    0.14 
   9  -2  -1    1.89    0.19 
   9  -2  -1    2.30    0.16 
   9  -2  -1    2.25    0.17 
  -9   2   1    2.47    0.17 
  -9   2   1    2.20    0.17 
   8  -2  -1    0.29    0.10 
   8  -2  -1    0.30    0.05 
   8  -2  -1    0.43    0.06 
   8  -2  -1    0.28    0.06 
   8  -2  -1    0.25    0.07 
  -8   2   1    0.45    0.07 
  -8   2   1    0.34    0.07 
   7  -2  -1    1.32    0.11 
   7  -2  -1    1.21    0.15 
   7  -2  -1    1.21    0.10 
   7  -2  -1    1.34    0.10 
  -7   2   1    1.39    0.11 
  -7   2   1    1.46    0.12 
  -7   2   1    1.25    0.11 
   6  -2  -1   21.69    0.79 
   6  -2  -1   22.05    0.82 
   6  -2  -1   20.63    0.78 
   6  -2  -1   21.90    0.78 
  -6   2   1   22.94    0.80 
  -6   2   1   20.93    0.79 
  -6   2   1   21.87    0.79 
   5  -2  -1   42.31    1.53 
   5  -2  -1   43.89    1.56 
   5  -2  -1   45.18    1.53 
  -5   2   1   44.89    1.53 
  -5   2   1   43.27    1.55 
  -5   2   1   43.49    1.53 
  -5   2   1   42.54    1.53 
  -5   2   1   43.35    1.53 
   4  -2  -1    5.15    0.22 
   4  -2  -1    5.41    0.21 
   4  -2  -1    5.05    0.23 
   4  -2  -1    5.42    0.22 
  -4   2   1    5.51    0.23 
  -4   2   1    5.14    0.22 
  -4   2   1    5.30    0.22 
  -4   2   1    5.17    0.21 
  -4   2   1    5.43    0.22 
   3  -2  -1   31.55    1.08 
   3  -2  -1   31.24    1.07 
   3  -2  -1   30.49    1.08 
   3  -2  -1   31.83    1.10 
   3  -2  -1   31.45    1.08 
  -3   2   1   30.54    1.08 
  -3   2   1   31.82    1.08 
  -3   2   1   29.64    1.07 
  -3   2   1   31.74    1.09 
  -3   2   1   26.70    1.07 
   2  -2  -1  270.62    9.46 
   2  -2  -1  281.26    9.47 
   2  -2  -1  242.77    9.45 
   2  -2  -1  262.74    9.44 
   2  -2  -1  277.16    9.41 
  -2   2   1  272.33    9.45 
  -2   2   1  283.76    9.42 
  -2   2   1  273.21    9.47 
  -2   2   1  291.28    9.45 
  -2   2   1  283.66    9.49 
   1  -2  -1  878.12   30.41 
   1  -2  -1  870.90   33.13 
   1  -2  -1  878.10   30.40 
  -1   2   1  889.63   30.46 
  -1   2   1  902.18   30.41 
  -1   2   1  836.48   30.37 
  -1   2   1  886.66   30.41 
  -1   2   1  924.69   30.42 
  -1   2   1  878.61   30.40 
   0  -2  -1  792.09   27.57 
   0  -2  -1  816.85   27.53 
   0  -2  -1  791.96   27.59 
   0   2   1  746.72   27.52 
   0   2   1  787.13   29.66 
   0   2   1  886.64   27.59 
   0   2   1  856.66   27.54 
   0   2   1  822.19   27.54 
   0   2   1  678.15   27.54 
   0   2   1  812.73   29.05 
  -1  -2  -1   24.67    0.87 
  -1  -2  -1   24.82    0.87 
  -1  -2  -1   24.32    0.87 
  -1  -2  -1   24.90    0.88 
  -1  -2  -1   24.19    0.88 
   1   2   1   25.93    0.87 
   1   2   1   24.24    0.87 
   1   2   1   23.96    0.88 
   1   2   1   24.96    0.88 
   1   2   1   25.09    0.87 
   1   2   1   23.58    0.86 
  -2  -2  -1   18.57    0.71 
  -2  -2  -1   19.51    0.72 
  -2  -2  -1   19.63    0.71 
  -2  -2  -1   19.20    0.71 
  -2  -2  -1   19.42    0.71 
   2   2   1   18.19    0.70 
   2   2   1   19.91    0.73 
   2   2   1   20.28    0.71 
   2   2   1   20.66    0.71 
   2   2   1   20.27    0.71 
   2   2   1   19.55    0.70 
   2   2   1   20.45    0.71 
  -3  -2  -1   50.18    1.63 
  -3  -2  -1   45.96    1.63 
  -3  -2  -1   43.86    1.64 
  -3  -2  -1   45.86    1.63 
  -3  -2  -1   45.28    1.62 
   3   2   1   48.10    1.61 
   3   2   1   45.38    1.63 
   3   2   1   45.37    1.62 
   3   2   1   49.06    1.62 
   3   2   1   42.45    1.64 
  -4  -2  -1    0.24    0.05 
  -4  -2  -1    0.32    0.06 
  -4  -2  -1    0.16    0.05 
  -4  -2  -1    0.37    0.06 
   4   2   1    0.39    0.08 
   4   2   1    0.28    0.06 
   4   2   1    0.47    0.07 
   4   2   1    0.29    0.05 
   4   2   1    0.25    0.05 
  -5  -2  -1   14.07    0.55 
  -5  -2  -1   14.50    0.56 
   5   2   1   15.07    0.54 
   5   2   1   14.55    0.54 
   5   2   1   14.03    0.56 
   5   2   1   13.91    0.58 
   5   2   1   14.90    0.55 
  -6  -2  -1    0.39    0.08 
  -6  -2  -1    0.50    0.08 
   6   2   1    0.39    0.08 
   6   2   1    0.42    0.09 
   6   2   1    0.39    0.06 
   6   2   1    0.58    0.10 
   6   2   1    0.37    0.07 
  -7  -2  -1    0.96    0.13 
  -7  -2  -1    1.27    0.14 
   7   2   1    1.17    0.10 
   7   2   1    1.10    0.10 
   7   2   1    0.87    0.13 
   7   2   1    0.99    0.15 
   7   2   1    1.21    0.13 
  -8  -2  -1    2.63    0.20 
   8   2   1    2.64    0.23 
   8   2   1    2.73    0.15 
   8   2   1    2.83    0.23 
   8   2   1    3.03    0.15 
  -9  -2  -1   22.46    0.89 
   9   2   1   23.89    0.91 
   9   2   1   23.01    0.94 
   9   2   1   22.65    0.83 
 -10  -2  -1   42.30    1.57 
  10   2   1   42.99    1.61 
  10   2   1   41.55    1.57 
 -11  -2  -1    0.77    0.14 
  11   2   1    1.27    0.22 
  11   2   1    0.88    0.17 
 -12  -2  -1   28.12    1.13 
  12   2   1   27.87    1.17 
  12   2   1   29.98    1.15 
 -13  -2  -1    9.06    0.54 
  13   2   1    9.53    0.51 
  15  -3  -1    1.61    0.24 
 -15   3   1    1.71    0.24 
  14  -3  -1    2.27    0.28 
 -14   3   1    2.01    0.23 
  13  -3  -1    0.55    0.16 
 -13   3   1    0.44    0.11 
  12  -3  -1    7.47    0.42 
  12  -3  -1    8.30    0.39 
 -12   3   1    7.84    0.39 
  11  -3  -1    4.72    0.22 
  11  -3  -1    5.49    0.32 
  11  -3  -1    5.18    0.28 
 -11   3   1    5.46    0.29 
  10  -3  -1    0.15    0.07 
  10  -3  -1    0.09    0.05 
  10  -3  -1    0.05    0.07 
 -10   3   1    0.05    0.07 
 -10   3   1    0.17    0.08 
   9  -3  -1   18.93    0.79 
   9  -3  -1   18.88    0.70 
   9  -3  -1   19.41    0.74 
   9  -3  -1   19.71    0.71 
   9  -3  -1   20.17    0.74 
  -9   3   1   19.76    0.75 
  -9   3   1   19.73    0.75 
   8  -3  -1   32.24    1.16 
   8  -3  -1   30.54    1.13 
   8  -3  -1   32.75    1.18 
   8  -3  -1   32.44    1.21 
   8  -3  -1   32.49    1.14 
   8  -3  -1   32.68    1.16 
  -8   3   1   32.29    1.17 
  -8   3   1   31.30    1.17 
  -8   3   1   33.13    1.17 
   7  -3  -1   20.26    0.72 
   7  -3  -1   18.65    0.73 
   7  -3  -1   19.42    0.70 
   7  -3  -1   19.30    0.76 
   7  -3  -1   19.76    0.70 
  -7   3   1   19.95    0.72 
  -7   3   1   19.62    0.73 
  -7   3   1   18.96    0.73 
   6  -3  -1    2.10    0.17 
   6  -3  -1    2.57    0.14 
   6  -3  -1    2.34    0.12 
   6  -3  -1    2.27    0.13 
  -6   3   1    2.26    0.13 
  -6   3   1    2.40    0.14 
  -6   3   1    2.24    0.14 
  -6   3   1    2.35    0.14 
   5  -3  -1    1.26    0.10 
   5  -3  -1    1.31    0.13 
   5  -3  -1    1.20    0.10 
  -5   3   1    1.34    0.09 
  -5   3   1    1.32    0.12 
  -5   3   1    1.34    0.10 
  -5   3   1    1.34    0.10 
  -5   3   1    1.41    0.10 
   4  -3  -1    0.53    0.09 
   4  -3  -1    0.47    0.07 
   4  -3  -1    0.65    0.07 
   4  -3  -1    0.61    0.05 
   4  -3  -1    0.55    0.07 
  -4   3   1    0.47    0.07 
  -4   3   1    0.60    0.06 
  -4   3   1    0.62    0.07 
  -4   3   1    0.53    0.07 
  -4   3   1    0.55    0.07 
  -4   3   1    0.46    0.08 
   3  -3  -1    3.56    0.15 
   3  -3  -1    3.26    0.14 
   3  -3  -1    3.45    0.15 
   3  -3  -1    3.20    0.15 
   3  -3  -1    3.56    0.17 
  -3   3   1    3.26    0.14 
  -3   3   1    3.35    0.16 
  -3   3   1    3.50    0.15 
  -3   3   1    3.29    0.15 
   2  -3  -1    0.47    0.06 
   2  -3  -1    0.49    0.06 
   2  -3  -1    0.54    0.06 
   2  -3  -1    0.58    0.06 
  -2   3   1    0.61    0.06 
  -2   3   1    0.52    0.06 
  -2   3   1    0.90    0.08 
  -2   3   1    0.50    0.06 
  -2   3   1    0.51    0.06 
   1  -3  -1   38.04    1.37 
   1  -3  -1   38.31    1.38 
   1  -3  -1   39.39    1.37 
   1  -3  -1   39.02    1.37 
  -1   3   1   39.93    1.37 
  -1   3   1   38.62    1.36 
  -1   3   1   40.75    1.38 
  -1   3   1   39.90    1.37 
  -1   3   1   38.54    1.37 
  -1   3   1   38.44    1.37 
   0  -3  -1    0.35    0.06 
   0  -3  -1    0.53    0.08 
   0  -3  -1    0.46    0.07 
   0  -3  -1    0.47    0.06 
   0  -3  -1    0.46    0.07 
   0   3   1    0.56    0.06 
   0   3   1    0.75    0.07 
   0   3   1    0.47    0.06 
   0   3   1    0.40    0.06 
   0   3   1    0.41    0.07 
   0   3   1    0.61    0.06 
   0   3   1    0.44    0.06 
  -1  -3  -1   55.72    1.95 
  -1  -3  -1   54.52    1.95 
  -1  -3  -1   57.09    1.96 
  -1  -3  -1   58.33    1.96 
   1   3   1   56.72    1.96 
   1   3   1   55.56    1.95 
   1   3   1   52.47    1.94 
   1   3   1   57.04    1.95 
   1   3   1   54.08    1.95 
  -2  -3  -1    0.26    0.05 
  -2  -3  -1    0.20    0.05 
  -2  -3  -1    0.26    0.05 
  -2  -3  -1    0.12    0.05 
  -2  -3  -1    0.21    0.06 
   2   3   1    0.25    0.05 
   2   3   1    0.45    0.07 
   2   3   1    0.30    0.05 
   2   3   1    0.28    0.05 
   2   3   1    0.21    0.06 
   2   3   1    0.33    0.05 
  -3  -3  -1    6.99    0.30 
  -3  -3  -1    7.48    0.29 
  -3  -3  -1    6.55    0.29 
   3   3   1    7.16    0.32 
   3   3   1    7.42    0.29 
   3   3   1    6.85    0.29 
   3   3   1    6.80    0.30 
   3   3   1    6.78    0.28 
   3   3   1    6.79    0.29 
  -4  -3  -1   39.77    1.43 
  -4  -3  -1   36.66    1.43 
  -4  -3  -1   43.46    1.44 
   4   3   1   39.69    1.43 
   4   3   1   40.25    1.42 
   4   3   1   38.54    1.41 
   4   3   1   41.83    1.42 
   4   3   1   39.28    1.46 
  -5  -3  -1    0.00    0.05 
  -5  -3  -1    0.12    0.06 
   5   3   1    0.13    0.05 
   5   3   1    0.11    0.06 
   5   3   1    0.10    0.07 
   5   3   1    0.20    0.07 
   5   3   1    0.14    0.05 
  -6  -3  -1   26.83    1.01 
  -6  -3  -1   28.17    1.01 
   6   3   1   26.18    1.04 
   6   3   1   27.27    1.00 
   6   3   1   26.64    1.00 
   6   3   1   28.87    0.98 
   6   3   1   24.77    0.97 
  -7  -3  -1  100.02    3.71 
  -7  -3  -1  105.80    3.71 
   7   3   1  110.70    3.69 
   7   3   1  104.24    3.67 
   7   3   1  107.67    3.67 
   7   3   1  102.30    3.74 
   7   3   1  107.65    3.71 
  -8  -3  -1   27.59    1.05 
   8   3   1   27.33    1.00 
   8   3   1   28.67    1.06 
   8   3   1   28.17    1.00 
   8   3   1   26.42    1.09 
  -9  -3  -1    0.18    0.10 
   9   3   1    0.18    0.06 
   9   3   1    0.15    0.06 
   9   3   1    0.22    0.12 
   9   3   1   -0.09    0.10 
 -10  -3  -1   12.76    0.59 
  10   3   1   13.42    0.49 
  10   3   1   13.11    0.63 
  10   3   1   13.67    0.60 
 -11  -3  -1    1.70    0.22 
  11   3   1    1.84    0.25 
  11   3   1    1.51    0.27 
 -12  -3  -1   24.72    1.08 
  12   3   1   27.49    1.07 
  15  -4  -1   11.28    0.59 
 -15   4   1   11.27    0.54 
  14  -4  -1    8.28    0.48 
 -14   4   1    8.96    0.44 
  13  -4  -1    1.21    0.19 
 -13   4   1    1.46    0.19 
  12  -4  -1    5.39    0.35 
  12  -4  -1    6.94    0.38 
 -12   4   1    6.17    0.33 
  11  -4  -1   25.03    0.91 
  11  -4  -1   23.69    0.86 
 -11   4   1   23.55    0.92 
  10  -4  -1   12.91    0.48 
  10  -4  -1   12.99    0.51 
  10  -4  -1   12.70    0.59 
  10  -4  -1   13.26    0.56 
 -10   4   1   13.03    0.54 
 -10   4   1   13.09    0.53 
   9  -4  -1    4.53    0.22 
   9  -4  -1    4.45    0.19 
   9  -4  -1    4.24    0.29 
   9  -4  -1    4.77    0.20 
   9  -4  -1    4.74    0.23 
  -9   4   1    4.32    0.24 
  -9   4   1    4.72    0.24 
   8  -4  -1   37.35    1.35 
   8  -4  -1   38.09    1.40 
   8  -4  -1   36.46    1.34 
   8  -4  -1   36.38    1.31 
   8  -4  -1   37.19    1.32 
  -8   4   1   39.89    1.34 
  -8   4   1   37.69    1.35 
  -8   4   1   35.14    1.34 
  -8   4   1   38.55    1.35 
   7  -4  -1   43.99    1.54 
   7  -4  -1   44.72    1.54 
   7  -4  -1   43.71    1.57 
   7  -4  -1   42.52    1.56 
   7  -4  -1   44.49    1.61 
  -7   4   1   45.43    1.57 
  -7   4   1   43.42    1.57 
  -7   4   1   43.06    1.55 
  -7   4   1   45.09    1.57 
   6  -4  -1    0.48    0.06 
   6  -4  -1    0.38    0.06 
   6  -4  -1    0.45    0.10 
   6  -4  -1    0.50    0.05 
   6  -4  -1    0.49    0.06 
  -6   4   1    0.45    0.08 
  -6   4   1    0.33    0.05 
  -6   4   1    0.41    0.07 
  -6   4   1    0.34    0.06 
   5  -4  -1   11.77    0.43 
   5  -4  -1   12.25    0.49 
   5  -4  -1   11.86    0.46 
   5  -4  -1   11.88    0.46 
  -5   4   1   12.50    0.46 
  -5   4   1   12.71    0.51 
  -5   4   1   12.31    0.47 
  -5   4   1   11.89    0.46 
  -5   4   1   12.27    0.46 
  -5   4   1   11.99    0.45 
   4  -4  -1    0.56    0.08 
   4  -4  -1    0.66    0.05 
   4  -4  -1    0.62    0.08 
   4  -4  -1    0.61    0.10 
  -4   4   1    0.64    0.05 
  -4   4   1    0.66    0.08 
  -4   4   1    0.53    0.09 
  -4   4   1    0.64    0.08 
  -4   4   1    0.76    0.08 
  -4   4   1    0.66    0.07 
   3  -4  -1   41.67    1.47 
   3  -4  -1   41.39    1.46 
   3  -4  -1   40.42    1.49 
   3  -4  -1   41.80    1.48 
  -3   4   1   43.53    1.49 
  -3   4   1   42.27    1.46 
  -3   4   1   41.40    1.48 
  -3   4   1   41.22    1.47 
  -3   4   1   42.32    1.47 
  -3   4   1   43.31    1.48 
   2  -4  -1    2.58    0.13 
   2  -4  -1    2.47    0.13 
   2  -4  -1    2.28    0.14 
   2  -4  -1    2.57    0.13 
   2  -4  -1    2.25    0.12 
  -2   4   1    2.38    0.14 
  -2   4   1    2.46    0.13 
  -2   4   1    2.41    0.12 
  -2   4   1    2.44    0.12 
  -2   4   1    2.54    0.13 
   1  -4  -1   47.68    1.70 
   1  -4  -1   51.02    1.70 
   1  -4  -1   53.46    1.72 
   1  -4  -1   43.59    1.70 
   1  -4  -1   48.03    1.70 
  -1   4   1   48.15    1.70 
  -1   4   1   50.21    1.70 
  -1   4   1   45.50    1.70 
  -1   4   1   48.27    1.69 
  -1   4   1   48.19    1.70 
   0  -4  -1  227.66    7.86 
   0  -4  -1  244.86    7.87 
   0  -4  -1  234.79    7.86 
   0  -4  -1  250.27    7.88 
   0   4   1  200.07    7.86 
   0   4   1  217.13    7.85 
   0   4   1  226.74    7.87 
   0   4   1  238.45    7.86 
   0   4   1  237.40    7.86 
   0   4   1  216.36    7.87 
   0   4   1  215.21    7.86 
  -1  -4  -1   52.33    1.76 
  -1  -4  -1   45.42    1.77 
  -1  -4  -1   51.26    1.75 
  -1  -4  -1   51.22    1.76 
  -1  -4  -1   48.12    1.75 
   1   4   1   51.20    1.76 
   1   4   1   51.18    1.76 
   1   4   1   44.86    1.75 
   1   4   1   52.73    1.78 
   1   4   1   50.32    1.75 
  -2  -4  -1   41.11    1.42 
  -2  -4  -1   39.14    1.41 
  -2  -4  -1   37.61    1.41 
   2   4   1   39.28    1.41 
   2   4   1   37.02    1.43 
   2   4   1   38.55    1.42 
   2   4   1   39.47    1.40 
   2   4   1   44.57    1.42 
  -3  -4  -1   45.74    1.51 
  -3  -4  -1   43.35    1.51 
   3   4   1   42.13    1.51 
   3   4   1   42.47    1.49 
   3   4   1   38.03    1.52 
   3   4   1   42.01    1.50 
   3   4   1   41.43    1.49 
   3   4   1   41.18    1.50 
  -4  -4  -1  105.49    3.74 
   4   4   1  103.92    3.71 
   4   4   1  109.96    3.73 
   4   4   1  110.96    3.73 
   4   4   1  111.09    3.73 
   4   4   1   99.44    3.76 
   4   4   1  108.10    3.74 
  -5  -4  -1   40.39    1.47 
   5   4   1   41.01    1.50 
   5   4   1   41.07    1.44 
   5   4   1   40.32    1.46 
   5   4   1   37.78    1.45 
   5   4   1   42.13    1.46 
   5   4   1   40.31    1.47 
  -6  -4  -1    9.14    0.38 
  -6  -4  -1    7.44    0.37 
   6   4   1    8.05    0.37 
   6   4   1    8.10    0.34 
   6   4   1    8.81    0.36 
   6   4   1    8.63    0.39 
   6   4   1    7.79    0.37 
   6   4   1    7.38    0.41 
  -7  -4  -1    1.74    0.18 
   7   4   1    1.63    0.20 
   7   4   1    1.52    0.13 
   7   4   1    1.40    0.17 
   7   4   1    1.63    0.21 
   7   4   1    1.46    0.14 
  -8  -4  -1    2.18    0.21 
   8   4   1    2.33    0.16 
   8   4   1    2.50    0.25 
   8   4   1    2.50    0.23 
   8   4   1    2.13    0.16 
   8   4   1    2.55    0.22 
  -9  -4  -1    0.88    0.14 
   9   4   1    1.02    0.16 
   9   4   1    1.06    0.11 
   9   4   1    0.89    0.17 
   9   4   1    0.88    0.12 
   9   4   1    1.24    0.18 
  10   4   1   12.92    0.49 
  10   4   1   12.90    0.59 
  10   4   1   13.25    0.61 
  10   4   1   12.70    0.63 
  11   4   1   19.31    0.79 
  11   4   1   17.48    0.81 
  15  -5  -1    2.50    0.33 
 -15   5   1    2.70    0.26 
  14  -5  -1    1.65    0.26 
 -14   5   1    2.37    0.23 
  13  -5  -1    0.90    0.18 
 -13   5   1    0.81    0.13 
  12  -5  -1    4.22    0.30 
 -12   5   1    3.91    0.26 
  11  -5  -1   14.49    0.53 
  11  -5  -1   14.92    0.68 
  11  -5  -1   15.04    0.57 
 -11   5   1   14.84    0.61 
  10  -5  -1   15.98    0.58 
  10  -5  -1   15.47    0.69 
  10  -5  -1   16.48    0.60 
 -10   5   1   16.02    0.64 
   9  -5  -1    0.99    0.09 
   9  -5  -1    1.11    0.19 
   9  -5  -1    0.98    0.08 
   9  -5  -1    1.03    0.10 
   9  -5  -1    0.98    0.13 
   9  -5  -1    1.10    0.09 
  -9   5   1    1.16    0.14 
  -9   5   1    1.03    0.13 
  -9   5   1    0.88    0.13 
   8  -5  -1   36.02    1.28 
   8  -5  -1   35.95    1.32 
   8  -5  -1   36.49    1.36 
   8  -5  -1   37.02    1.28 
   8  -5  -1   37.73    1.31 
   8  -5  -1   35.15    1.27 
  -8   5   1   36.78    1.32 
  -8   5   1   35.33    1.31 
  -8   5   1   36.41    1.30 
  -8   5   1   37.57    1.32 
   7  -5  -1   25.03    0.97 
   7  -5  -1   24.62    0.90 
   7  -5  -1   25.02    0.93 
   7  -5  -1   25.50    0.92 
   7  -5  -1   24.92    0.89 
  -7   5   1   25.40    0.93 
  -7   5   1   26.01    0.93 
  -7   5   1   26.26    0.92 
  -7   5   1   25.43    0.93 
   6  -5  -1    0.11    0.05 
   6  -5  -1    0.19    0.03 
   6  -5  -1    0.20    0.09 
   6  -5  -1    0.22    0.04 
   6  -5  -1    0.20    0.06 
  -6   5   1    0.20    0.06 
  -6   5   1    0.35    0.06 
  -6   5   1    0.24    0.06 
  -6   5   1    0.21    0.06 
  -6   5   1    0.23    0.05 
   5  -5  -1   35.20    1.17 
   5  -5  -1   30.16    1.11 
   5  -5  -1   31.91    1.13 
   5  -5  -1   30.66    1.14 
  -5   5   1   32.61    1.14 
  -5   5   1   31.29    1.14 
  -5   5   1   32.02    1.13 
  -5   5   1   30.23    1.14 
   4  -5  -1    1.16    0.10 
   4  -5  -1    1.40    0.13 
   4  -5  -1    1.21    0.10 
   4  -5  -1    1.37    0.08 
  -4   5   1    1.29    0.10 
  -4   5   1    1.25    0.12 
  -4   5   1    1.29    0.08 
  -4   5   1    1.18    0.11 
  -4   5   1    1.29    0.11 
  -4   5   1    1.11    0.10 
   3  -5  -1    5.75    0.25 
   3  -5  -1    5.86    0.24 
   3  -5  -1    6.76    0.28 
   3  -5  -1    5.55    0.25 
  -3   5   1    5.77    0.25 
  -3   5   1    6.37    0.27 
  -3   5   1    5.59    0.25 
  -3   5   1    5.38    0.24 
  -3   5   1    5.81    0.25 
   2  -5  -1  199.30    6.68 
   2  -5  -1  166.48    6.69 
  -2   5   1  196.83    6.68 
  -2   5   1  199.00    6.69 
  -2   5   1  198.68    6.68 
  -2   5   1  201.47    6.69 
   1  -5  -1  410.77   14.35 
   1  -5  -1  402.28   14.41 
   1  -5  -1  431.18   14.37 
  -1   5   1  418.35   14.32 
  -1   5   1  427.52   14.42 
  -1   5   1  403.06   14.39 
  -1   5   1  411.05   14.48 
  -1   5   1  414.46   14.33 
  -1   5   1  427.95   14.38 
   0  -5  -1   16.80    0.63 
   0  -5  -1   17.92    0.65 
   0  -5  -1   17.18    0.64 
   0   5   1   15.95    0.65 
   0   5   1   17.11    0.62 
   0   5   1   17.08    0.63 
   0   5   1   17.33    0.63 
   0   5   1   16.13    0.63 
   0   5   1   16.47    0.64 
  -1  -5  -1   58.02    1.95 
  -1  -5  -1   56.35    1.96 
  -1  -5  -1   52.84    1.96 
   1   5   1   54.90    1.95 
   1   5   1   57.58    1.96 
   1   5   1   51.19    1.98 
   1   5   1   55.46    1.97 
   1   5   1   57.78    1.97 
  -2  -5  -1   52.48    1.82 
  -2  -5  -1   52.93    1.82 
  -2  -5  -1   51.90    1.81 
   2   5   1   52.39    1.82 
   2   5   1   53.34    1.85 
   2   5   1   50.82    1.83 
   2   5   1   46.13    1.81 
   2   5   1   49.99    1.80 
  -3  -5  -1   20.57    0.77 
  -3  -5  -1   20.70    0.77 
  -3  -5  -1   21.39    0.77 
   3   5   1   19.81    0.76 
   3   5   1   19.53    0.74 
   3   5   1   20.18    0.77 
   3   5   1   18.05    0.78 
   3   5   1   20.64    0.76 
  -4  -5  -1   10.17    0.44 
  -4  -5  -1   10.65    0.44 
  -4  -5  -1   10.62    0.44 
   4   5   1    9.86    0.41 
   4   5   1    9.63    0.42 
   4   5   1    8.92    0.46 
   4   5   1   10.69    0.43 
   4   5   1   10.55    0.45 
  -5  -5  -1   44.22    1.77 
  -5  -5  -1   51.77    1.79 
   5   5   1   46.62    1.75 
   5   5   1   52.24    1.79 
   5   5   1   48.70    1.77 
   5   5   1   46.46    1.76 
   5   5   1   51.16    1.77 
   5   5   1   53.78    1.83 
  -6  -5  -1    1.07    0.15 
  -6  -5  -1    1.27    0.16 
   6   5   1    1.44    0.20 
   6   5   1    1.33    0.14 
   6   5   1    0.92    0.14 
   6   5   1    1.37    0.16 
   6   5   1    1.44    0.14 
   7   5   1   61.47    2.27 
   7   5   1   63.10    2.27 
   7   5   1   63.32    2.29 
   7   5   1   64.56    2.23 
   7   5   1   64.31    2.33 
   8   5   1   28.74    1.15 
   8   5   1   28.60    1.11 
   8   5   1   28.59    1.04 
   8   5   1   27.98    1.09 
  -9  -5  -1    7.01    0.40 
   9   5   1    7.90    0.34 
   9   5   1    7.80    0.46 
   9   5   1    7.40    0.43 
   9   5   1    8.07    0.41 
  10   5   1    9.99    0.67 
  10   5   1    9.58    0.52 
  10   5   1    9.00    0.48 
  10   5   1    9.59    0.38 
  11   5   1    0.03    0.16 
  15  -6  -1    0.08    0.16 
 -15   6   1    0.23    0.12 
  14  -6  -1    0.54    0.17 
 -14   6   1    0.98    0.16 
  13  -6  -1   33.62    1.33 
 -13   6   1   35.04    1.30 
  12  -6  -1   14.44    0.68 
 -12   6   1   14.42    0.61 
  11  -6  -1    0.00    0.13 
 -11   6   1    0.28    0.09 
  10  -6  -1   53.98    1.92 
  10  -6  -1   55.36    2.04 
  10  -6  -1   54.97    1.91 
 -10   6   1   56.47    1.96 
 -10   6   1   55.22    1.98 
   9  -6  -1   63.59    2.27 
   9  -6  -1   62.43    2.17 
   9  -6  -1   60.03    2.20 
   9  -6  -1   60.87    2.16 
  -9   6   1   63.97    2.22 
  -9   6   1   62.35    2.21 
  -9   6   1   62.67    2.20 
   8  -6  -1   75.26    2.67 
   8  -6  -1   76.83    2.64 
   8  -6  -1   74.38    2.68 
   8  -6  -1   76.90    2.64 
   8  -6  -1   80.18    2.74 
  -8   6   1   75.60    2.69 
  -8   6   1   75.19    2.68 
  -8   6   1   77.03    2.71 
  -8   6   1   74.50    2.67 
   7  -6  -1    3.11    0.15 
   7  -6  -1    3.32    0.24 
   7  -6  -1    3.14    0.18 
   7  -6  -1    3.11    0.18 
  -7   6   1    3.25    0.19 
  -7   6   1    3.32    0.19 
  -7   6   1    3.21    0.17 
  -7   6   1    3.07    0.18 
  -7   6   1    3.31    0.18 
   6  -6  -1    2.09    0.10 
   6  -6  -1    2.39    0.14 
   6  -6  -1    2.24    0.15 
   6  -6  -1    2.22    0.12 
   6  -6  -1    2.28    0.18 
  -6   6   1    2.15    0.14 
  -6   6   1    2.15    0.14 
  -6   6   1    2.16    0.15 
  -6   6   1    2.16    0.15 
  -6   6   1    2.37    0.15 
   5  -6  -1   30.87    1.10 
   5  -6  -1   30.87    1.09 
   5  -6  -1   29.89    1.07 
   5  -6  -1   29.16    1.12 
  -5   6   1   30.47    1.10 
  -5   6   1   30.45    1.10 
  -5   6   1   29.53    1.09 
  -5   6   1   30.39    1.07 
  -5   6   1   31.86    1.10 
   4  -6  -1    3.95    0.22 
   4  -6  -1    3.88    0.17 
   4  -6  -1    3.93    0.19 
   4  -6  -1    3.56    0.21 
  -4   6   1    3.97    0.17 
  -4   6   1    3.86    0.18 
  -4   6   1    3.62    0.19 
  -4   6   1    3.65    0.19 
  -4   6   1    3.64    0.19 
   3  -6  -1   36.96    1.36 
   3  -6  -1   39.25    1.39 
   3  -6  -1   38.76    1.37 
  -3   6   1   38.71    1.38 
  -3   6   1   37.42    1.37 
  -3   6   1   38.97    1.36 
  -3   6   1   38.92    1.36 
  -3   6   1   40.91    1.38 
  -3   6   1   35.88    1.37 
   2  -6  -1    6.58    0.27 
   2  -6  -1    5.39    0.25 
  -2   6   1    5.81    0.26 
  -2   6   1    5.67    0.25 
  -2   6   1    5.07    0.25 
  -2   6   1    5.56    0.26 
   1  -6  -1   54.49    1.92 
   1  -6  -1   57.69    1.93 
   1  -6  -1   56.33    1.92 
  -1   6   1   54.12    1.92 
  -1   6   1   55.38    1.92 
  -1   6   1   55.42    1.92 
  -1   6   1   52.12    1.91 
  -1   6   1   50.10    1.92 
  -1   6   1   52.25    1.90 
   0  -6  -1    0.74    0.08 
   0  -6  -1    1.09    0.11 
   0  -6  -1    0.54    0.10 
   0   6   1    0.84    0.11 
   0   6   1    0.77    0.10 
   0   6   1    0.49    0.09 
   0   6   1    0.42    0.08 
   0   6   1    0.51    0.09 
  -1  -6  -1    0.23    0.06 
  -1  -6  -1    0.08    0.06 
  -1  -6  -1    0.04    0.06 
   1   6   1    0.06    0.05 
   1   6   1    0.02    0.05 
   1   6   1    0.16    0.07 
   1   6   1    0.02    0.07 
   1   6   1    0.14    0.06 
  -2  -6  -1   48.50    1.78 
  -2  -6  -1   49.99    1.79 
  -2  -6  -1   51.16    1.79 
   2   6   1   50.35    1.77 
   2   6   1   52.24    1.79 
   2   6   1   51.02    1.82 
   2   6   1   45.97    1.78 
   2   6   1   50.45    1.80 
  -3  -6  -1   67.68    2.35 
  -3  -6  -1   69.09    2.34 
   3   6   1   67.58    2.32 
   3   6   1   66.28    2.34 
   3   6   1   55.86    2.33 
   3   6   1   67.74    2.35 
   3   6   1   67.56    2.38 
  -4  -6  -1   12.96    0.54 
  -4  -6  -1   12.97    0.54 
  -4  -6  -1   13.18    0.54 
   4   6   1   12.38    0.51 
   4   6   1   12.75    0.55 
   4   6   1   13.12    0.53 
   4   6   1   12.73    0.53 
   4   6   1   12.75    0.57 
  -5  -6  -1    0.19    0.08 
  -5  -6  -1    0.18    0.10 
  -5  -6  -1    0.19    0.09 
   5   6   1    0.24    0.09 
   5   6   1    0.15    0.07 
   5   6   1    0.27    0.11 
   5   6   1    0.48    0.09 
   5   6   1    0.00    0.10 
  -6  -6  -1    0.51    0.12 
  -6  -6  -1    0.67    0.12 
   6   6   1    0.42    0.09 
   6   6   1    0.32    0.13 
   6   6   1    0.47    0.13 
  -7  -6  -1    0.10    0.10 
  -7  -6  -1    0.16    0.11 
   7   6   1   -0.03    0.11 
   7   6   1   -0.08    0.11 
   7   6   1    0.08    0.08 
  -8  -6  -1    4.98    0.33 
  -8  -6  -1    5.32    0.34 
   8   6   1    5.24    0.27 
   8   6   1    5.19    0.37 
   8   6   1    4.85    0.35 
   9   6   1   16.41    0.62 
   9   6   1   15.38    0.73 
  10   6   1   12.05    0.46 
  10   6   1   11.87    0.61 
  15  -7  -1   28.82    1.19 
 -15   7   1   29.27    1.15 
  14  -7  -1    2.40    0.29 
 -14   7   1    2.21    0.25 
 -13   7   1    4.87    0.31 
  12  -7  -1   12.39    0.62 
 -12   7   1   12.33    0.55 
  11  -7  -1    1.58    0.26 
 -11   7   1    1.83    0.18 
 -11   7   1    1.71    0.19 
  10  -7  -1   12.64    0.60 
 -10   7   1   12.95    0.52 
 -10   7   1   12.93    0.54 
   9  -7  -1   35.61    1.27 
   9  -7  -1   37.40    1.38 
  -9   7   1   36.36    1.33 
  -9   7   1   35.82    1.31 
  -9   7   1   35.54    1.32 
   8  -7  -1   26.59    0.96 
   8  -7  -1   27.52    1.06 
   8  -7  -1   26.24    0.99 
  -8   7   1   27.06    1.00 
  -8   7   1   27.29    0.99 
  -8   7   1   27.39    1.01 
   7  -7  -1    0.08    0.04 
   7  -7  -1   -0.02    0.07 
   7  -7  -1    0.07    0.10 
   7  -7  -1   -0.02    0.05 
  -7   7   1    0.05    0.06 
  -7   7   1   -0.06    0.06 
  -7   7   1    0.06    0.05 
  -7   7   1    0.01    0.06 
   6  -7  -1    5.01    0.22 
   6  -7  -1    5.55    0.29 
   6  -7  -1    5.17    0.25 
  -6   7   1    5.27    0.21 
  -6   7   1    5.10    0.26 
  -6   7   1    5.73    0.25 
  -6   7   1    5.29    0.26 
   5  -7  -1    0.08    0.04 
   5  -7  -1    0.20    0.06 
   5  -7  -1    0.17    0.08 
  -5   7   1    0.14    0.06 
  -5   7   1    0.08    0.06 
  -5   7   1    0.09    0.04 
  -5   7   1    0.09    0.05 
   4  -7  -1   14.55    0.59 
   4  -7  -1   13.97    0.55 
   4  -7  -1   14.48    0.56 
  -4   7   1   15.01    0.57 
  -4   7   1   14.57    0.57 
  -4   7   1   15.23    0.56 
  -4   7   1   14.80    0.55 
   3  -7  -1   14.75    0.56 
   3  -7  -1   13.73    0.56 
   3  -7  -1   15.27    0.58 
  -3   7   1   14.53    0.56 
  -3   7   1   14.38    0.56 
  -3   7   1   15.08    0.57 
   2  -7  -1   20.01    0.74 
   2  -7  -1   18.83    0.73 
  -2   7   1   19.46    0.74 
  -2   7   1   19.48    0.73 
  -2   7   1   18.82    0.72 
  -2   7   1   19.47    0.74 
   1  -7  -1    7.28    0.30 
   1  -7  -1    6.32    0.30 
  -1   7   1    6.56    0.30 
  -1   7   1    6.02    0.30 
  -1   7   1    6.38    0.29 
  -1   7   1    7.26    0.31 
  -1   7   1    6.09    0.31 
   0  -7  -1   87.58    2.98 
   0  -7  -1   77.51    2.99 
   0  -7  -1   86.84    3.00 
   0   7   1   85.41    3.02 
   0   7   1   90.23    3.01 
   0   7   1   84.21    3.00 
   0   7   1   81.37    2.98 
   0   7   1   89.72    3.00 
  -1  -7  -1   28.02    1.06 
   1   7   1   26.61    1.08 
   1   7   1   28.60    1.06 
   1   7   1   28.18    1.07 
   1   7   1   30.44    1.05 
   1   7   1   29.36    1.06 
  -2  -7  -1    6.44    0.30 
  -2  -7  -1    5.99    0.30 
   2   7   1    5.97    0.28 
   2   7   1    5.53    0.31 
   2   7   1    5.74    0.30 
   2   7   1    5.25    0.32 
   2   7   1    6.51    0.30 
  -3  -7  -1   20.67    0.83 
  -3  -7  -1   21.19    0.84 
   3   7   1   22.00    0.83 
   3   7   1   20.97    0.83 
   3   7   1   23.17    0.88 
   3   7   1   21.61    0.85 
   3   7   1   22.13    0.82 
  -4  -7  -1    2.73    0.21 
  -4  -7  -1    3.06    0.22 
   4   7   1    2.90    0.25 
   4   7   1    3.17    0.26 
   4   7   1    3.26    0.20 
   4   7   1    2.58    0.21 
   4   7   1    2.83    0.20 
  -5  -7  -1    0.02    0.09 
  -5  -7  -1    0.14    0.09 
   5   7   1    0.03    0.11 
   5   7   1    0.15    0.08 
   5   7   1   -0.03    0.11 
  -6  -7  -1    0.64    0.12 
  -6  -7  -1    0.76    0.14 
   6   7   1    0.62    0.10 
   6   7   1    0.69    0.15 
   6   7   1    0.52    0.15 
   7   7   1    0.31    0.14 
   7   7   1   -0.01    0.13 
   7   7   1    0.24    0.09 
   8   7   1    0.50    0.17 
   8   7   1    0.39    0.10 
   9   7   1   14.73    0.58 
 -15   8   1    0.93    0.16 
  14  -8  -1    1.99    0.28 
 -14   8   1    3.05    0.27 
  13  -8  -1    0.49    0.17 
 -13   8   1    0.46    0.12 
  12  -8  -1   16.32    0.77 
 -12   8   1   16.44    0.67 
 -12   8   1   17.19    0.70 
  11  -8  -1   44.87    1.71 
 -11   8   1   45.00    1.64 
 -11   8   1   44.29    1.62 
  10  -8  -1    9.16    0.48 
 -10   8   1    8.50    0.41 
 -10   8   1    8.74    0.39 
   9  -8  -1    6.08    0.25 
   9  -8  -1    6.43    0.38 
  -9   8   1    6.20    0.30 
  -9   8   1    6.28    0.32 
   8  -8  -1   11.49    0.47 
   8  -8  -1   12.35    0.54 
  -8   8   1   11.54    0.48 
  -8   8   1   11.16    0.48 
  -8   8   1   11.35    0.47 
  -8   8   1   10.39    0.48 
   7  -8  -1    0.17    0.11 
   7  -8  -1    0.14    0.06 
  -7   8   1    0.23    0.08 
  -7   8   1    0.23    0.07 
  -7   8   1    0.28    0.08 
   6  -8  -1    5.24    0.30 
   6  -8  -1    4.74    0.25 
   6  -8  -1    5.36    0.24 
  -6   8   1    5.20    0.27 
  -6   8   1    5.08    0.22 
  -6   8   1    5.26    0.27 
  -6   8   1    5.17    0.25 
   5  -8  -1   65.58    2.33 
   5  -8  -1   63.55    2.30 
  -5   8   1   67.79    2.30 
  -5   8   1   63.66    2.31 
  -5   8   1   64.80    2.30 
  -5   8   1   64.97    2.28 
   4  -8  -1    7.86    0.34 
   4  -8  -1    8.03    0.37 
  -4   8   1    7.92    0.33 
  -4   8   1    7.82    0.35 
  -4   8   1    7.27    0.35 
  -4   8   1    7.92    0.34 
   3  -8  -1   42.29    1.50 
   3  -8  -1   38.87    1.50 
  -3   8   1   41.78    1.49 
  -3   8   1   41.80    1.49 
  -3   8   1   42.79    1.51 
   2  -8  -1   39.61    1.41 
   2  -8  -1   34.19    1.41 
  -2   8   1   39.18    1.42 
  -2   8   1   42.21    1.42 
  -2   8   1   40.27    1.42 
  -2   8   1   37.07    1.41 
  -2   8   1   40.05    1.40 
   1  -8  -1   18.29    0.68 
   1  -8  -1   17.27    0.68 
  -1   8   1   16.36    0.69 
  -1   8   1   17.45    0.67 
  -1   8   1   16.95    0.68 
  -1   8   1   18.02    0.69 
   0  -8  -1    0.96    0.14 
   0  -8  -1    0.90    0.13 
   0   8   1    1.17    0.17 
   0   8   1    0.90    0.14 
   0   8   1    0.90    0.14 
   0   8   1    0.90    0.15 
   0   8   1    0.79    0.13 
  -1  -8  -1    4.22    0.24 
  -1  -8  -1    3.72    0.22 
   1   8   1    4.05    0.23 
   1   8   1    4.04    0.25 
   1   8   1    3.88    0.23 
   1   8   1    3.57    0.26 
   1   8   1    4.22    0.24 
  -2  -8  -1    2.40    0.21 
  -2  -8  -1    2.72    0.20 
   2   8   1    2.83    0.23 
   2   8   1    2.41    0.20 
   2   8   1    2.66    0.24 
   2   8   1    2.83    0.20 
   2   8   1    2.49    0.19 
  -3  -8  -1   35.87    1.29 
  -3  -8  -1   30.77    1.26 
   3   8   1   35.53    1.28 
   3   8   1   36.21    1.26 
   3   8   1   33.26    1.29 
   3   8   1   34.21    1.32 
  -4  -8  -1    1.17    0.17 
  -4  -8  -1    1.17    0.18 
   4   8   1    1.18    0.16 
   4   8   1    1.03    0.17 
   4   8   1    1.02    0.16 
  -5  -8  -1   13.01    0.60 
   5   8   1   12.02    0.61 
   5   8   1   12.71    0.53 
   5   8   1   13.20    0.59 
   6   8   1    0.99    0.18 
   6   8   1    0.70    0.16 
   6   8   1    1.06    0.17 
   7   8   1   13.07    0.86 
   7   8   1   14.83    0.59 
   8   8   1    8.74    0.39 
 -15   9   1    0.52    0.15 
 -14   9   1    4.85    0.33 
  13  -9  -1    0.34    0.17 
 -13   9   1    0.24    0.12 
 -13   9   1    0.48    0.12 
  12  -9  -1    2.69    0.31 
 -12   9   1    3.11    0.25 
 -12   9   1    3.21    0.24 
  11  -9  -1    0.90    0.19 
 -11   9   1    0.61    0.11 
 -11   9   1    0.77    0.13 
  10  -9  -1    0.20    0.14 
 -10   9   1    0.40    0.10 
 -10   9   1    0.31    0.09 
   9  -9  -1    8.92    0.48 
  -9   9   1    9.07    0.43 
  -9   9   1    9.60    0.41 
   8  -9  -1    1.18    0.22 
  -8   9   1    1.02    0.17 
  -8   9   1    0.99    0.15 
   7  -9  -1   11.05    0.50 
  -7   9   1    9.47    0.37 
  -7   9   1   10.77    0.45 
  -7   9   1    9.47    0.44 
  -7   9   1    9.96    0.43 
   6  -9  -1    1.27    0.14 
   6  -9  -1    1.41    0.19 
  -6   9   1    1.19    0.15 
  -6   9   1    1.26    0.16 
  -6   9   1    1.19    0.11 
  -6   9   1    0.99    0.16 
   5  -9  -1    0.67    0.13 
   5  -9  -1    0.80    0.10 
  -5   9   1    0.67    0.11 
  -5   9   1    0.65    0.11 
  -5   9   1    0.73    0.10 
  -5   9   1    0.63    0.11 
   4  -9  -1    3.77    0.22 
   4  -9  -1    3.45    0.24 
  -4   9   1    3.40    0.21 
  -4   9   1    3.56    0.22 
  -4   9   1    3.62    0.21 
  -4   9   1    3.32    0.22 
   3  -9  -1    7.82    0.35 
   3  -9  -1    7.23    0.36 
  -3   9   1    7.76    0.34 
  -3   9   1    7.32    0.35 
  -3   9   1    7.82    0.36 
   2  -9  -1    0.78    0.15 
   2  -9  -1    0.68    0.11 
  -2   9   1    0.88    0.15 
  -2   9   1    0.81    0.14 
  -2   9   1    0.54    0.11 
  -2   9   1    0.97    0.14 
  -2   9   1    0.59    0.11 
   1  -9  -1    2.96    0.20 
   1  -9  -1    2.45    0.19 
  -1   9   1    2.75    0.21 
  -1   9   1    2.45    0.21 
  -1   9   1    2.63    0.21 
  -1   9   1    2.47    0.20 
  -1   9   1    2.51    0.19 
   0  -9  -1    5.77    0.32 
   0  -9  -1    6.51    0.33 
   0   9   1    6.54    0.36 
   0   9   1    7.25    0.36 
   0   9   1    6.85    0.34 
   0   9   1    7.05    0.33 
   0   9   1    7.51    0.35 
  -1  -9  -1   13.53    0.59 
  -1  -9  -1   14.38    0.61 
   1   9   1   13.93    0.62 
   1   9   1   15.23    0.61 
   1   9   1   14.07    0.64 
   1   9   1   15.28    0.65 
   1   9   1   15.69    0.59 
  -2  -9  -1   55.81    2.16 
  -2  -9  -1   64.15    2.19 
   2   9   1   61.13    2.18 
   2   9   1   61.09    2.16 
   2   9   1   57.08    2.21 
   2   9   1   63.85    2.20 
   3   9   1    5.62    0.38 
   3   9   1    6.74    0.32 
   3   9   1    6.01    0.37 
   4   9   1    0.16    0.09 
   4   9   1    0.09    0.12 
   4   9   1    0.13    0.13 
   5   9   1    5.99    0.32 
   5   9   1    6.49    0.41 
   6   9   1    0.13    0.10 
   7   9   1    1.70    0.20 
 -15  10   1    0.70    0.16 
  14 -10  -1    0.08    0.16 
 -14  10   1    0.01    0.11 
  13 -10  -1    0.43    0.18 
 -13  10   1    0.13    0.12 
 -13  10   1    0.37    0.12 
  12 -10  -1    2.50    0.31 
 -12  10   1    2.80    0.25 
 -12  10   1    2.86    0.24 
  11 -10  -1    1.35    0.26 
 -11  10   1    1.53    0.19 
 -11  10   1    1.50    0.21 
  10 -10  -1   24.77    1.02 
 -10  10   1   24.64    0.96 
 -10  10   1   23.89    0.93 
   9 -10  -1   28.21    1.13 
  -9  10   1   28.66    1.08 
  -9  10   1   28.00    1.06 
   8 -10  -1    9.58    0.48 
  -8  10   1    8.88    0.41 
  -8  10   1    8.94    0.43 
   7 -10  -1   36.07    1.34 
  -7  10   1   34.78    1.30 
  -7  10   1   33.92    1.28 
   6 -10  -1    0.07    0.10 
  -6  10   1    0.14    0.09 
  -6  10   1   -0.07    0.07 
  -6  10   1    0.22    0.06 
   5 -10  -1    0.68    0.13 
  -5  10   1    0.66    0.11 
  -5  10   1    0.84    0.13 
  -5  10   1    0.74    0.12 
  -5  10   1    0.63    0.11 
   4 -10  -1    5.96    0.31 
  -4  10   1    5.68    0.29 
  -4  10   1    5.77    0.31 
  -4  10   1    4.36    0.28 
  -4  10   1    5.80    0.29 
   3 -10  -1   22.47    0.81 
  -3  10   1   18.99    0.78 
  -3  10   1   21.07    0.81 
  -3  10   1   19.11    0.79 
  -3  10   1   20.70    0.82 
   2 -10  -1    0.31    0.10 
  -2  10   1    0.25    0.10 
  -2  10   1    0.32    0.10 
  -2  10   1    0.39    0.10 
  -2  10   1    0.14    0.09 
  -2  10   1    0.29    0.11 
   1 -10  -1   36.26    1.41 
  -1  10   1   36.93    1.46 
  -1  10   1   38.90    1.44 
  -1  10   1   39.62    1.43 
  -1  10   1   39.61    1.44 
  -1  10   1   39.32    1.41 
   0 -10  -1   87.10    3.16 
   0  10   1   89.03    3.18 
   0  10   1   92.45    3.19 
   0  10   1   90.43    3.20 
   0  10   1   88.49    3.16 
   1  10   1    7.55    0.42 
   1  10   1    7.70    0.43 
   1  10   1    7.93    0.38 
   1  10   1    7.74    0.40 
   2  10   1    5.16    0.30 
   2  10   1    5.23    0.35 
   3  10   1    1.14    0.19 
   3  10   1    1.12    0.18 
   4  10   1    0.71    0.13 
   4  10   1    0.73    0.17 
   5  10   1    7.09    0.36 
   6  10   1    6.36    0.34 
  14 -11  -1    0.20    0.19 
 -14  11   1    0.23    0.13 
 -14  11   1    0.31    0.12 
  13 -11  -1    7.32    0.48 
 -13  11   1    6.52    0.40 
 -13  11   1    6.52    0.37 
  12 -11  -1   14.93    0.73 
 -12  11   1   14.43    0.64 
 -12  11   1   14.34    0.62 
  11 -11  -1    6.26    0.44 
 -11  11   1    7.28    0.36 
 -11  11   1    6.31    0.37 
  10 -11  -1    0.13    0.15 
 -10  11   1    0.15    0.11 
 -10  11   1    0.26    0.10 
   9 -11  -1    0.20    0.14 
  -9  11   1    0.17    0.11 
  -9  11   1    0.27    0.10 
   8 -11  -1    0.13    0.14 
  -8  11   1    0.13    0.11 
  -8  11   1    0.07    0.09 
   7 -11  -1   45.61    1.61 
  -7  11   1   42.54    1.57 
  -7  11   1   39.78    1.55 
   6 -11  -1   17.19    0.72 
  -6  11   1   17.15    0.70 
  -6  11   1   16.69    0.68 
   5 -11  -1    6.32    0.34 
  -5  11   1    5.68    0.29 
  -5  11   1    5.93    0.31 
  -5  11   1    5.74    0.33 
   4 -11  -1    1.40    0.19 
  -4  11   1    0.97    0.13 
  -4  11   1    0.68    0.11 
   3 -11  -1    3.97    0.25 
  -3  11   1    3.21    0.25 
  -3  11   1    3.47    0.24 
  -3  11   1    3.03    0.24 
   2 -11  -1   16.15    0.66 
  -2  11   1   14.78    0.68 
  -2  11   1   17.88    0.67 
  -2  11   1   15.65    0.67 
  -1  11   1   20.81    0.85 
  -1  11   1   21.14    0.87 
  -1  11   1   21.54    0.83 
   0  11   1    9.75    0.49 
   0  11   1   10.10    0.45 
   0  11   1    9.25    0.54 
   1  11   1    4.20    0.31 
   1  11   1    3.80    0.27 
   2  11   1    0.06    0.13 
   2  11   1    0.22    0.11 
   3  11   1    6.51    0.35 
   3  11   1    6.25    0.42 
   4  11   1    8.98    0.43 
 -14  12   1    3.99    0.33 
  13 -12  -1    3.86    0.38 
 -13  12   1    3.81    0.32 
 -13  12   1    3.58    0.29 
  12 -12  -1    3.96    0.37 
 -12  12   1    4.57    0.31 
 -12  12   1    3.96    0.32 
  11 -12  -1    2.70    0.33 
 -11  12   1    2.41    0.24 
 -11  12   1    2.57    0.27 
  10 -12  -1   -0.24    0.14 
 -10  12   1    0.17    0.12 
 -10  12   1    0.19    0.11 
   9 -12  -1    7.46    0.44 
  -9  12   1    6.85    0.39 
  -9  12   1    7.21    0.38 
   8 -12  -1   30.14    1.17 
  -8  12   1   29.08    1.11 
  -8  12   1   28.04    1.12 
   7 -12  -1    8.29    0.45 
  -7  12   1    8.07    0.40 
  -7  12   1    7.99    0.42 
   6 -12  -1    4.81    0.33 
  -6  12   1    4.55    0.29 
  -6  12   1    4.75    0.31 
   5 -12  -1    1.86    0.22 
  -5  12   1    1.99    0.21 
  -5  12   1    1.00    0.17 
   4 -12  -1    0.78    0.15 
  -4  12   1    0.50    0.12 
  -4  12   1    0.60    0.12 
  -4  12   1    0.72    0.12 
  -3  12   1    4.17    0.28 
  -3  12   1    4.76    0.29 
  -3  12   1    3.92    0.30 
  -2  12   1   20.14    0.82 
  -2  12   1   19.57    0.82 
  -2  12   1   19.61    0.79 
  -1  12   1    0.14    0.10 
  -1  12   1    0.17    0.12 
   0  12   1    3.36    0.26 
   0  12   1    3.56    0.29 
   1  12   1    5.47    0.37 
   1  12   1    4.94    0.31 
   2  12   1    0.15    0.11 
   2  12   1    0.33    0.16 
   3  12   1    0.04    0.11 
 -13  13   1    1.53    0.26 
  12 -13  -1    0.51    0.20 
 -12  13   1    0.61    0.13 
 -12  13   1    0.60    0.16 
  11 -13  -1   11.76    0.63 
 -11  13   1   11.79    0.54 
 -11  13   1   11.40    0.57 
  10 -13  -1    1.88    0.30 
 -10  13   1    1.85    0.25 
 -10  13   1    1.69    0.23 
   9 -13  -1    0.08    0.15 
  -9  13   1    0.04    0.12 
  -9  13   1    0.06    0.10 
   8 -13  -1    4.61    0.35 
  -8  13   1    4.58    0.32 
  -8  13   1    4.15    0.30 
   7 -13  -1    2.73    0.28 
  -7  13   1    3.03    0.25 
  -7  13   1    2.68    0.27 
  -6  13   1    0.87    0.14 
  -6  13   1    0.74    0.14 
  -5  13   1    0.23    0.11 
  -5  13   1    0.14    0.06 
  -4  13   1    0.28    0.11 
  -4  13   1    0.24    0.13 
  -3  13   1    2.90    0.25 
  -3  13   1    2.80    0.25 
  -2  13   1    0.09    0.11 
  -2  13   1   -0.08    0.10 
  -1  13   1    0.05    0.12 
  -1  13   1    0.03    0.10 
   0  13   1    3.01    0.26 
   0  13   1    2.50    0.30 
   1  13   1    2.80    0.26 
  11 -14  -1    4.62    0.40 
 -11  14   1    4.56    0.33 
 -11  14   1    4.40    0.36 
  10 -14  -1    5.86    0.45 
 -10  14   1    6.00    0.37 
 -10  14   1    6.15    0.41 
  -9  14   1    0.87    0.16 
  -9  14   1    0.68    0.17 
  -8  14   1    0.84    0.15 
  -8  14   1    0.96    0.17 
  -7  14   1    3.47    0.28 
  -7  14   1    3.03    0.30 
  -6  14   1    1.61    0.22 
  -5  14   1    2.00    0.24 
  -4  14   1    0.10    0.12 
  -3  14   1    2.98    0.27 
  -2  14   1    3.52    0.29 
  -1  14   1   18.60    0.86 
  -1  14   1   19.28    0.79 
  -7  15   1    3.43    0.30 
  -6  15   1    1.98    0.26 
  -6  16  -2    0.63    0.16 
  -1  15  -2    0.18    0.13 
  -2  15  -2    0.22    0.14 
  -2  15  -2    0.23    0.13 
  -3  15  -2    1.76    0.25 
  -3  15  -2    1.68    0.27 
  -4  15  -2    1.33    0.19 
  -4  15  -2    1.57    0.24 
  -5  15  -2    3.15    0.31 
  -5  15  -2    3.91    0.29 
  -6  15  -2    0.47    0.13 
  -6  15  -2    0.59    0.15 
  -7  15  -2    0.03    0.12 
  -7  15  -2   -0.08    0.11 
  -8  15  -2   12.56    0.60 
  -8  15  -2   12.66    0.57 
  -9  15  -2    1.49    0.20 
 -10  15  -2    0.00    0.13 
   1  14  -2    1.05    0.17 
   1  14  -2    1.39    0.25 
   0  14  -2    0.52    0.14 
   0  14  -2    0.57    0.15 
  -1  14  -2    0.93    0.17 
  -1  14  -2    1.31    0.17 
  -1  14  -2    1.24    0.23 
  -2  14  -2    4.40    0.31 
  -2  14  -2    4.69    0.33 
  -2  14  -2    4.92    0.44 
  -3  14  -2    1.65    0.24 
  -3  14  -2    1.47    0.21 
  -4  14  -2    0.20    0.12 
  -4  14  -2    0.14    0.11 
  -5  14  -2    4.73    0.34 
  -5  14  -2    5.02    0.31 
  -6  14  -2   26.80    1.07 
  -6  14  -2   27.23    1.04 
  -7  14  -2    0.05    0.10 
  -7  14  -2   -0.10    0.12 
  -8  14  -2    9.18    0.48 
  -8  14  -2    9.68    0.46 
  -9  14  -2    2.94    0.28 
 -10  14  -2    0.84    0.16 
 -11  14  -2    5.77    0.37 
  11 -14   2    5.59    0.38 
 -12  14  -2   12.54    0.59 
  12 -14   2   12.06    0.61 
   3  13  -2    0.24    0.13 
   2  13  -2    0.56    0.16 
   2  13  -2    0.34    0.13 
   1  13  -2   16.60    0.76 
   1  13  -2   17.54    0.72 
   0  13  -2   14.04    0.64 
   0  13  -2   13.76    0.60 
   0  13  -2   14.08    0.63 
  -1  13  -2    5.51    0.34 
  -1  13  -2    7.01    0.38 
  -1  13  -2    6.06    0.36 
  -2  13  -2    0.41    0.13 
  -2  13  -2    0.55    0.12 
  -2  13  -2    0.47    0.12 
  -3  13  -2    0.07    0.10 
  -3  13  -2   -0.04    0.09 
  -3  13  -2    0.12    0.11 
  -4  13  -2    1.63    0.20 
  -4  13  -2    1.55    0.22 
  -5  13  -2   19.06    0.75 
  -5  13  -2   18.32    0.77 
  -6  13  -2   25.77    0.96 
  -6  13  -2   23.80    0.97 
  -7  13  -2    1.08    0.19 
  -7  13  -2    1.01    0.16 
   7 -13   2    1.16    0.20 
  -8  13  -2    1.30    0.21 
  -8  13  -2    1.39    0.19 
   8 -13   2    1.10    0.21 
  -9  13  -2    0.57    0.14 
   9 -13   2    0.66    0.16 
 -10  13  -2    0.14    0.12 
 -11  13  -2    5.70    0.35 
  11 -13   2    5.34    0.37 
 -12  13  -2    0.66    0.15 
  12 -13   2    0.77    0.18 
 -13  13  -2    0.84    0.16 
  13 -13   2    1.30    0.22 
   5  12  -2    4.85    0.34 
   4  12  -2    0.43    0.14 
   3  12  -2    0.05    0.11 
   3  12  -2    0.04    0.13 
   2  12  -2   21.40    0.93 
   2  12  -2   24.87    0.92 
   2  12  -2   23.97    0.98 
   1  12  -2    3.21    0.28 
   1  12  -2    3.75    0.30 
   1  12  -2    3.55    0.26 
   0  12  -2    1.11    0.18 
   0  12  -2    0.75    0.14 
   0  12  -2    0.55    0.14 
  -1  12  -2    2.35    0.21 
  -1  12  -2    2.56    0.23 
  -1  12  -2    2.17    0.24 
  -1  12  -2    2.64    0.23 
  -2  12  -2    1.48    0.18 
  -2  12  -2    1.41    0.18 
  -2  12  -2    1.50    0.20 
  -2  12  -2    1.44    0.19 
  -3  12  -2    8.54    0.43 
  -3  12  -2    9.24    0.41 
  -3  12  -2    8.78    0.41 
  -4  12  -2   49.41    1.72 
  -4  12  -2   46.59    1.71 
  -4  12  -2   46.85    1.74 
  -5  12  -2   30.09    1.15 
  -5  12  -2   30.67    1.13 
   5 -12   2   30.05    1.14 
  -6  12  -2   31.25    1.18 
  -6  12  -2   34.35    1.16 
   6 -12   2   27.88    1.17 
  -7  12  -2   27.67    1.02 
  -7  12  -2   26.61    1.04 
   7 -12   2   27.21    1.06 
  -8  12  -2   17.56    0.72 
  -8  12  -2   18.05    0.71 
   8 -12   2   17.72    0.76 
  -9  12  -2    5.16    0.32 
   9 -12   2    5.47    0.36 
 -10  12  -2    0.10    0.10 
 -11  12  -2    0.59    0.13 
  11 -12   2    0.65    0.16 
 -12  12  -2   13.34    0.59 
  12 -12   2   12.74    0.63 
 -13  12  -2    6.07    0.38 
  13 -12   2    6.61    0.42 
 -14  12  -2    0.06    0.13 
   6  11  -2    2.04    0.25 
   5  11  -2   14.55    0.65 
   5  11  -2   16.40    0.79 
   4  11  -2   12.49    0.55 
   4  11  -2   12.21    0.61 
   3  11  -2    0.30    0.14 
   3  11  -2    0.45    0.13 
   3  11  -2    0.38    0.12 
   2  11  -2   37.79    1.43 
   2  11  -2   40.06    1.49 
   1  11  -2    2.39    0.23 
   1  11  -2    1.98    0.21 
   1  11  -2    1.71    0.24 
   0  11  -2   19.38    0.78 
   0  11  -2   19.76    0.78 
   0  11  -2   19.78    0.76 
   0  11  -2   18.76    0.79 
  -1  11  -2   66.92    2.35 
  -1  11  -2   64.92    2.35 
  -1  11  -2   63.81    2.32 
  -1  11  -2   65.12    2.34 
  -2  11  -2    6.34    0.34 
  -2  11  -2    6.99    0.32 
  -2  11  -2    6.25    0.34 
   2 -11   2    6.63    0.34 
  -3  11  -2    9.31    0.43 
  -3  11  -2    9.46    0.41 
  -3  11  -2    9.08    0.40 
   3 -11   2    8.86    0.39 
  -4  11  -2    2.43    0.20 
  -4  11  -2    1.98    0.17 
  -4  11  -2    2.38    0.18 
   4 -11   2    2.21    0.18 
  -5  11  -2    0.39    0.10 
  -5  11  -2    0.65    0.11 
  -5  11  -2    0.82    0.14 
   5 -11   2    0.50    0.11 
  -6  11  -2    9.56    0.41 
  -6  11  -2    9.74    0.43 
   6 -11   2    9.60    0.45 
  -7  11  -2    0.06    0.09 
  -7  11  -2    0.14    0.08 
   7 -11   2    0.12    0.11 
  -8  11  -2    9.44    0.44 
  -8  11  -2    9.49    0.42 
   8 -11   2    9.95    0.49 
  -9  11  -2   15.07    0.60 
  -9  11  -2   13.86    0.60 
   9 -11   2   14.35    0.66 
 -10  11  -2    7.64    0.38 
 -11  11  -2    0.48    0.12 
  11 -11   2    0.18    0.13 
 -12  11  -2    0.23    0.11 
  12 -11   2    0.04    0.13 
 -13  11  -2    2.04    0.25 
  13 -11   2    2.00    0.28 
 -14  11  -2    1.95    0.26 
  14 -11   2    1.99    0.31 
   7  10  -2    1.12    0.16 
   6  10  -2   17.67    0.73 
   6  10  -2   17.74    0.82 
   5  10  -2   19.99    0.87 
   5  10  -2   19.48    0.79 
   4  10  -2    5.40    0.37 
   4  10  -2    4.61    0.32 
   4  10  -2    5.36    0.31 
   3  10  -2   -0.02    0.09 
   3  10  -2    0.12    0.12 
   3  10  -2    0.00    0.10 
   2  10  -2   68.43    2.45 
   2  10  -2   66.39    2.42 
   2  10  -2   66.71    2.39 
   1  10  -2    0.34    0.12 
   1  10  -2    0.33    0.10 
   1  10  -2    0.48    0.11 
   1  10  -2    0.37    0.10 
   0  10  -2    6.46    0.34 
   0  10  -2    6.10    0.35 
   0  10  -2    6.58    0.33 
   0  10  -2    6.29    0.32 
   0 -10   2    7.34    0.30 
  -1  10  -2    2.86    0.20 
  -1  10  -2    3.04    0.20 
  -1  10  -2    2.99    0.22 
  -1  10  -2    2.58    0.22 
   1 -10   2    2.87    0.16 
  -2  10  -2    1.82    0.18 
  -2  10  -2    1.79    0.21 
  -2  10  -2    2.01    0.18 
  -2  10  -2    1.82    0.13 
  -2  10  -2    1.89    0.16 
   2 -10   2    1.88    0.14 
  -3  10  -2   24.62    0.87 
  -3  10  -2   22.60    0.89 
  -3  10  -2   23.36    0.88 
  -3  10  -2   22.97    0.86 
   3 -10   2   23.44    0.87 
  -4  10  -2   10.67    0.44 
  -4  10  -2   10.82    0.45 
  -4  10  -2   10.51    0.43 
   4 -10   2   10.44    0.45 
  -5  10  -2   58.82    2.09 
  -5  10  -2   57.50    2.06 
  -5  10  -2   59.04    2.08 
   5 -10   2   59.66    2.11 
  -6  10  -2   15.56    0.63 
  -6  10  -2   15.88    0.61 
   6 -10   2   15.95    0.66 
  -7  10  -2    4.92    0.25 
  -7  10  -2    4.62    0.26 
   7 -10   2    4.79    0.30 
  -8  10  -2   10.96    0.45 
  -8  10  -2   10.75    0.47 
   8 -10   2   11.34    0.53 
  -9  10  -2    5.17    0.27 
  -9  10  -2    5.06    0.29 
 -10  10  -2    9.36    0.44 
  10 -10   2   10.14    0.48 
 -11  10  -2   11.38    0.52 
  11 -10   2   12.22    0.56 
 -12  10  -2    7.31    0.37 
  12 -10   2    6.61    0.41 
 -13  10  -2    2.38    0.24 
  13 -10   2    2.40    0.29 
 -14  10  -2   20.55    0.85 
  14 -10   2   20.70    0.90 
 -15  10  -2    8.07    0.45 
   8   9  -2    5.36    0.33 
   7   9  -2    8.40    0.42 
   7   9  -2    8.30    0.50 
   6   9  -2    2.84    0.30 
   6   9  -2    3.17    0.25 
   5   9  -2    1.47    0.24 
   5   9  -2    1.23    0.21 
   5   9  -2    1.22    0.19 
   4   9  -2    9.65    0.45 
   4   9  -2    9.26    0.48 
   4   9  -2    9.42    0.43 
   3   9  -2    5.37    0.29 
   3   9  -2    6.47    0.35 
   3   9  -2    5.67    0.31 
   3   9  -2    5.07    0.32 
   2   9  -2   15.63    0.62 
   2   9  -2   16.82    0.67 
   2   9  -2   15.06    0.64 
   2   9  -2   14.93    0.64 
   2   9  -2   15.61    0.64 
  -2  -9   2   15.11    0.57 
   1   9  -2    5.10    0.31 
   1   9  -2    5.20    0.29 
   1   9  -2    5.20    0.28 
   1   9  -2    5.66    0.29 
   1   9  -2    5.55    0.27 
  -1  -9   2    5.10    0.27 
  -1  -9   2    5.21    0.22 
   0   9  -2   47.74    1.91 
   0   9  -2   54.95    1.92 
   0   9  -2   53.85    1.90 
   0   9  -2   56.09    1.93 
   0   9  -2   55.96    1.92 
   0  -9   2   57.02    1.90 
   0  -9   2   47.00    1.86 
   0  -9   2   54.66    1.85 
  -1   9  -2   41.41    1.40 
  -1   9  -2   37.27    1.38 
  -1   9  -2   39.44    1.37 
  -1   9  -2   38.07    1.39 
  -1   9  -2   38.65    1.39 
  -1   9  -2   38.05    1.35 
   1  -9   2   38.59    1.39 
   1  -9   2   34.47    1.34 
   1  -9   2   37.68    1.37 
  -2   9  -2    3.44    0.21 
  -2   9  -2    3.18    0.20 
  -2   9  -2    3.10    0.17 
  -2   9  -2    3.76    0.21 
  -2   9  -2    3.45    0.19 
  -2   9  -2    3.44    0.20 
   2  -9   2    3.69    0.21 
   2  -9   2    3.50    0.19 
   2  -9   2    3.36    0.18 
  -3   9  -2   61.60    2.17 
  -3   9  -2   62.90    2.16 
  -3   9  -2   61.77    2.18 
  -3   9  -2   61.19    2.17 
  -3   9  -2   57.95    2.17 
  -3   9  -2   60.36    2.16 
   3  -9   2   60.29    2.17 
   3  -9   2   66.45    2.17 
   3  -9   2   59.73    2.16 
  -4   9  -2  125.75    4.27 
  -4   9  -2  129.69    4.26 
  -4   9  -2  108.90    4.26 
  -4   9  -2  125.09    4.27 
  -4   9  -2  121.51    4.27 
  -4   9  -2  126.23    4.25 
   4  -9   2  118.81    4.28 
   4  -9   2  123.47    4.25 
   4  -9   2  124.31    4.27 
  -5   9  -2    2.74    0.17 
  -5   9  -2    2.54    0.13 
  -5   9  -2    2.60    0.16 
  -5   9  -2    2.33    0.18 
  -5   9  -2    2.57    0.17 
   5  -9   2    2.59    0.14 
   5  -9   2    2.64    0.19 
   5  -9   2    2.24    0.17 
  -6   9  -2    6.70    0.31 
  -6   9  -2    6.61    0.31 
  -6   9  -2    6.78    0.29 
  -6   9  -2    6.65    0.30 
   6  -9   2    6.30    0.30 
   6  -9   2    6.14    0.33 
   6  -9   2    6.55    0.27 
  -7   9  -2   10.05    0.41 
  -7   9  -2    9.96    0.48 
  -7   9  -2    9.91    0.42 
   7  -9   2   10.19    0.47 
  -8   9  -2   38.40    1.42 
  -8   9  -2   39.79    1.43 
   8  -9   2   40.74    1.49 
  -9   9  -2   26.33    0.99 
  -9   9  -2   26.70    0.98 
 -10   9  -2    6.71    0.34 
 -10   9  -2    7.30    0.35 
  10  -9   2    6.49    0.37 
 -11   9  -2    3.89    0.26 
  11  -9   2    4.15    0.30 
 -12   9  -2   12.60    0.55 
  12  -9   2   12.63    0.59 
 -13   9  -2    2.64    0.24 
  13  -9   2    2.37    0.29 
 -14   9  -2    0.40    0.13 
  14  -9   2    0.37    0.18 
 -15   9  -2    9.82    0.50 
   9   8  -2    0.51    0.13 
   8   8  -2    0.13    0.10 
   8   8  -2    0.14    0.14 
   7   8  -2    1.30    0.19 
   7   8  -2    1.03    0.19 
   6   8  -2    0.95    0.13 
   6   8  -2    0.86    0.16 
   6   8  -2    0.74    0.14 
   5   8  -2   15.97    0.66 
   5   8  -2   15.43    0.67 
   5   8  -2   15.83    0.70 
   5   8  -2   16.16    0.64 
   4   8  -2    8.19    0.41 
   4   8  -2    7.31    0.37 
   4   8  -2    7.12    0.36 
   4   8  -2    7.38    0.36 
   4   8  -2    7.20    0.35 
  -4  -8   2    7.18    0.35 
  -4  -8   2    7.27    0.31 
   3   8  -2   74.91    2.51 
   3   8  -2   71.35    2.48 
   3   8  -2   61.13    2.44 
   3   8  -2   71.79    2.48 
  -3  -8   2   66.81    2.42 
  -3  -8   2   70.81    2.46 
   2   8  -2   84.63    3.11 
   2   8  -2   88.35    3.11 
   2   8  -2   87.62    3.10 
   2   8  -2   99.99    3.15 
   2   8  -2   91.79    3.12 
  -2  -8   2   84.94    3.05 
  -2  -8   2   89.57    3.11 
  -2  -8   2   81.04    3.06 
   1   8  -2    0.05    0.06 
   1   8  -2   -0.02    0.06 
   1   8  -2    0.06    0.07 
   1   8  -2   -0.01    0.06 
   1   8  -2    0.06    0.08 
  -1  -8   2    0.06    0.03 
  -1  -8   2    0.07    0.06 
  -1  -8   2   -0.02    0.04 
   0   8  -2   42.86    1.58 
   0   8  -2   45.17    1.56 
   0   8  -2   45.85    1.58 
   0   8  -2   42.34    1.59 
   0   8  -2   46.70    1.58 
   0   8  -2   44.37    1.58 
   0  -8   2   38.40    1.53 
   0  -8   2   45.22    1.57 
   0  -8   2   44.48    1.53 
  -1   8  -2   29.15    1.11 
  -1   8  -2   31.97    1.13 
  -1   8  -2   32.68    1.14 
  -1   8  -2   31.91    1.14 
  -1   8  -2   32.41    1.13 
  -1   8  -2   30.78    1.10 
   1  -8   2   26.76    1.09 
   1  -8   2   32.77    1.12 
   1  -8   2   31.46    1.13 
  -2   8  -2   17.98    0.67 
  -2   8  -2   18.24    0.67 
  -2   8  -2   17.39    0.67 
  -2   8  -2   17.04    0.65 
  -2   8  -2   18.01    0.66 
  -2   8  -2   15.98    0.66 
   2  -8   2   17.94    0.67 
   2  -8   2   18.07    0.65 
   2  -8   2   18.67    0.66 
  -3   8  -2    0.77    0.10 
  -3   8  -2    0.83    0.10 
  -3   8  -2    1.01    0.12 
  -3   8  -2    1.10    0.11 
  -3   8  -2    0.79    0.10 
  -3   8  -2    0.90    0.11 
   3  -8   2    0.79    0.09 
   3  -8   2    1.04    0.11 
   3  -8   2    0.76    0.11 
  -4   8  -2    9.89    0.39 
  -4   8  -2    9.52    0.40 
  -4   8  -2   10.24    0.40 
  -4   8  -2    9.80    0.41 
  -4   8  -2   10.17    0.41 
  -4   8  -2   10.54    0.42 
   4  -8   2   10.28    0.39 
   4  -8   2    9.77    0.41 
   4  -8   2   10.07    0.42 
  -5   8  -2    2.55    0.15 
  -5   8  -2    2.48    0.15 
  -5   8  -2    2.56    0.14 
  -5   8  -2    2.47    0.16 
  -5   8  -2    2.21    0.11 
   5  -8   2    2.26    0.13 
   5  -8   2    2.27    0.15 
   5  -8   2    1.96    0.17 
  -6   8  -2   53.36    1.90 
  -6   8  -2   52.73    1.90 
  -6   8  -2   56.40    1.91 
  -6   8  -2   52.74    1.89 
   6  -8   2   53.50    1.88 
   6  -8   2   53.32    1.91 
   6  -8   2   54.64    1.94 
  -7   8  -2   53.93    1.93 
  -7   8  -2   52.22    1.93 
  -7   8  -2   54.12    1.92 
  -7   8  -2   55.57    1.94 
   7  -8   2   55.01    1.99 
   7  -8   2   55.25    1.94 
   7  -8   2   56.13    1.92 
  -8   8  -2   20.98    0.74 
  -8   8  -2   19.58    0.76 
  -8   8  -2   19.59    0.76 
   8  -8   2   19.65    0.79 
  -9   8  -2    0.65    0.09 
  -9   8  -2    0.63    0.10 
   9  -8   2    0.60    0.13 
 -10   8  -2    0.29    0.08 
 -10   8  -2    0.28    0.09 
  10  -8   2    0.29    0.12 
 -11   8  -2    6.00    0.32 
  11  -8   2    6.03    0.36 
 -12   8  -2   14.26    0.60 
  12  -8   2   14.11    0.65 
 -13   8  -2    4.75    0.30 
  13  -8   2    4.72    0.35 
 -14   8  -2    4.89    0.32 
  14  -8   2    4.61    0.37 
 -15   8  -2    0.01    0.11 
  10   7  -2    3.26    0.26 
   9   7  -2   14.23    0.60 
   9   7  -2   14.31    0.69 
   8   7  -2    4.92    0.29 
   8   7  -2    4.67    0.36 
   7   7  -2    4.21    0.32 
   7   7  -2    3.69    0.29 
   7   7  -2    3.32    0.29 
   7   7  -2    3.59    0.25 
   6   7  -2   24.73    1.01 
   6   7  -2   25.18    0.94 
   6   7  -2   24.33    0.97 
   6   7  -2   25.19    0.96 
  -6  -7   2   24.67    0.96 
  -6  -7   2   24.73    0.93 
   5   7  -2    7.21    0.36 
   5   7  -2    7.67    0.35 
   5   7  -2    7.41    0.40 
   5   7  -2    7.09    0.35 
   5   7  -2    7.60    0.38 
  -5  -7   2    7.13    0.32 
  -5  -7   2    7.66    0.36 
   4   7  -2   54.60    1.97 
   4   7  -2   54.09    2.00 
   4   7  -2   56.69    1.98 
   4   7  -2   55.75    1.96 
   4   7  -2   53.09    1.97 
  -4  -7   2   54.18    1.93 
  -4  -7   2   57.08    1.97 
  -4  -7   2   54.00    1.93 
   3   7  -2    0.99    0.17 
   3   7  -2    0.77    0.13 
   3   7  -2    0.85    0.12 
   3   7  -2    0.80    0.13 
  -3  -7   2    0.81    0.08 
  -3  -7   2    0.77    0.09 
  -3  -7   2    0.97    0.12 
   2   7  -2    1.43    0.13 
   2   7  -2    1.31    0.16 
   2   7  -2    1.48    0.15 
   2   7  -2    1.70    0.14 
   2   7  -2    1.25    0.14 
  -2  -7   2    1.54    0.13 
  -2  -7   2    1.24    0.08 
  -2  -7   2    1.57    0.09 
   1   7  -2   44.08    1.57 
   1   7  -2   42.71    1.55 
   1   7  -2   43.72    1.56 
   1   7  -2   43.05    1.55 
   1   7  -2   42.12    1.54 
   1   7  -2   46.97    1.56 
  -1  -7   2   41.84    1.50 
  -1  -7   2   43.74    1.55 
  -1  -7   2   42.45    1.51 
   0   7  -2    1.50    0.14 
   0   7  -2    1.44    0.13 
   0   7  -2    1.37    0.12 
   0   7  -2    1.46    0.12 
   0   7  -2    1.41    0.11 
   0  -7   2    1.28    0.08 
   0  -7   2    1.25    0.07 
   0  -7   2    1.27    0.10 
  -1   7  -2   20.92    0.75 
  -1   7  -2   21.46    0.79 
  -1   7  -2   20.71    0.78 
  -1   7  -2   21.29    0.78 
  -1   7  -2   20.32    0.77 
  -1   7  -2   21.46    0.78 
   1  -7   2   22.04    0.77 
   1  -7   2   21.05    0.78 
   1  -7   2   21.05    0.76 
  -2   7  -2   21.50    0.77 
  -2   7  -2   20.72    0.77 
  -2   7  -2   21.09    0.76 
  -2   7  -2   20.53    0.77 
  -2   7  -2   21.18    0.76 
  -2   7  -2   20.09    0.77 
   2  -7   2   21.98    0.76 
   2  -7   2   20.67    0.76 
   2  -7   2   20.88    0.77 
  -3   7  -2   16.33    0.66 
  -3   7  -2   17.16    0.65 
  -3   7  -2   17.75    0.66 
  -3   7  -2   18.19    0.65 
  -3   7  -2   18.22    0.66 
  -3   7  -2   17.54    0.66 
   3  -7   2   18.85    0.65 
   3  -7   2   18.33    0.66 
   3  -7   2   18.10    0.67 
  -4   7  -2  357.56   12.19 
  -4   7  -2  366.71   12.19 
  -4   7  -2  350.62   12.19 
  -4   7  -2  360.63   12.18 
  -4   7  -2  335.55   12.20 
  -4   7  -2  352.36   12.20 
   4  -7   2  350.72   12.19 
   4  -7   2  363.09   12.17 
   4  -7   2  350.03   12.24 
  -5   7  -2   89.02    3.20 
  -5   7  -2   90.59    3.19 
  -5   7  -2   93.51    3.20 
  -5   7  -2   89.62    3.20 
   5  -7   2   98.19    3.24 
   5  -7   2   92.17    3.19 
   5  -7   2   91.56    3.21 
  -6   7  -2   45.04    1.60 
  -6   7  -2   46.26    1.61 
  -6   7  -2   43.31    1.61 
  -6   7  -2   44.27    1.61 
   6  -7   2   45.30    1.59 
   6  -7   2   46.99    1.61 
   6  -7   2   47.23    1.66 
  -7   7  -2    6.42    0.27 
  -7   7  -2    6.48    0.28 
  -7   7  -2    6.31    0.28 
   7  -7   2    6.40    0.25 
   7  -7   2    6.31    0.28 
  -8   7  -2    0.39    0.06 
  -8   7  -2    0.44    0.08 
  -8   7  -2    0.39    0.07 
   8  -7   2    0.51    0.08 
   8  -7   2    0.49    0.11 
  -9   7  -2    4.07    0.21 
  -9   7  -2    3.90    0.22 
   9  -7   2    4.08    0.26 
 -10   7  -2   14.59    0.57 
 -10   7  -2   14.59    0.59 
  10  -7   2   14.93    0.63 
 -11   7  -2   21.72    0.85 
 -11   7  -2   22.79    0.86 
  11  -7   2   21.73    0.89 
 -12   7  -2    2.95    0.23 
  12  -7   2    3.10    0.28 
 -13   7  -2    4.00    0.27 
  13  -7   2    3.88    0.33 
 -14   7  -2    0.19    0.11 
  14  -7   2    0.35    0.17 
 -15   7  -2    0.30    0.12 
  11   6  -2    4.74    0.29 
  10   6  -2   17.50    0.69 
  10   6  -2   16.49    0.79 
   9   6  -2    0.86    0.18 
   9   6  -2    0.71    0.12 
   8   6  -2   51.43    1.84 
   8   6  -2   49.58    1.92 
   8   6  -2   52.74    1.85 
   7   6  -2   34.24    1.27 
   7   6  -2   34.21    1.24 
   7   6  -2   34.42    1.32 
   7   6  -2   33.53    1.23 
  -7  -6   2   33.78    1.27 
  -7  -6   2   32.72    1.26 
   6   6  -2    3.64    0.23 
   6   6  -2    3.64    0.20 
   6   6  -2    3.87    0.28 
   6   6  -2    3.28    0.24 
   6   6  -2    3.63    0.25 
   6   6  -2    3.68    0.23 
  -6  -6   2    3.77    0.22 
  -6  -6   2    3.43    0.23 
   5   6  -2   10.55    0.44 
   5   6  -2    9.89    0.40 
   5   6  -2   10.57    0.48 
   5   6  -2    9.90    0.44 
   5   6  -2   10.28    0.43 
   5   6  -2   10.19    0.45 
  -5  -6   2   10.36    0.44 
  -5  -6   2    9.63    0.41 
   4   6  -2    6.08    0.30 
   4   6  -2    6.21    0.26 
   4   6  -2    5.98    0.30 
   4   6  -2    5.99    0.28 
   4   6  -2    6.10    0.30 
   4   6  -2    7.53    0.35 
  -4  -6   2    5.79    0.26 
  -4  -6   2    6.38    0.29 
   3   6  -2   75.09    2.62 
   3   6  -2   77.93    2.60 
   3   6  -2   70.60    2.58 
   3   6  -2   74.89    2.60 
   3   6  -2   66.14    2.58 
  -3  -6   2   73.93    2.56 
  -3  -6   2   78.84    2.59 
  -3  -6   2   71.43    2.56 
   2   6  -2  102.30    3.44 
   2   6  -2   96.07    3.40 
   2   6  -2  101.21    3.42 
   2   6  -2   96.96    3.42 
   2   6  -2   98.97    3.42 
   2   6  -2   96.35    3.42 
  -2  -6   2   97.40    3.41 
  -2  -6   2   93.73    3.38 
   1   6  -2   78.89    2.60 
   1   6  -2   76.86    2.61 
   1   6  -2   76.03    2.60 
   1   6  -2   69.68    2.59 
   1   6  -2   74.62    2.61 
  -1  -6   2   71.79    2.56 
  -1  -6   2   72.25    2.59 
   0   6  -2    1.76    0.13 
   0   6  -2    1.98    0.13 
   0   6  -2    2.03    0.12 
   0   6  -2    2.08    0.12 
   0  -6   2    1.62    0.11 
   0  -6   2    1.89    0.09 
   0  -6   2    1.80    0.13 
  -1   6  -2    0.11    0.03 
  -1   6  -2    0.01    0.04 
  -1   6  -2    0.03    0.04 
  -1   6  -2    0.07    0.04 
  -1   6  -2    0.05    0.04 
   1  -6   2    0.18    0.05 
   1  -6   2    0.10    0.04 
   1  -6   2    0.13    0.04 
  -2   6  -2   47.61    1.68 
  -2   6  -2   48.68    1.69 
  -2   6  -2   46.81    1.68 
  -2   6  -2   51.63    1.67 
  -2   6  -2   50.79    1.68 
   2  -6   2   48.12    1.69 
   2  -6   2   41.44    1.68 
   2  -6   2   48.90    1.68 
  -3   6  -2  179.77    6.33 
  -3   6  -2  188.75    6.33 
  -3   6  -2  180.66    6.32 
  -3   6  -2  187.62    6.31 
  -3   6  -2  161.01    6.33 
   3  -6   2  196.38    6.34 
   3  -6   2  188.12    6.32 
   3  -6   2  185.19    6.33 
  -4   6  -2   39.42    1.40 
  -4   6  -2   40.43    1.41 
  -4   6  -2   36.14    1.38 
  -4   6  -2   42.24    1.43 
  -4   6  -2   40.20    1.39 
  -4   6  -2   39.72    1.41 
  -4   6  -2   40.14    1.41 
   4  -6   2   41.35    1.44 
   4  -6   2   40.38    1.40 
   4  -6   2   40.31    1.41 
  -5   6  -2   39.49    1.39 
  -5   6  -2   39.65    1.39 
  -5   6  -2   40.27    1.39 
  -5   6  -2   39.60    1.38 
   5  -6   2   39.24    1.43 
   5  -6   2   38.79    1.39 
   5  -6   2   39.01    1.38 
  -6   6  -2    1.37    0.11 
  -6   6  -2    1.45    0.11 
  -6   6  -2    1.51    0.09 
   6  -6   2    1.48    0.09 
   6  -6   2    1.33    0.11 
  -7   6  -2   21.29    0.77 
  -7   6  -2   21.66    0.75 
  -7   6  -2   19.59    0.76 
   7  -6   2   21.39    0.77 
   7  -6   2   20.63    0.80 
   7  -6   2   20.31    0.74 
  -8   6  -2   12.38    0.48 
  -8   6  -2   12.50    0.47 
  -8   6  -2   12.20    0.48 
  -8   6  -2   12.22    0.48 
   8  -6   2   12.07    0.48 
   8  -6   2   11.91    0.52 
  -9   6  -2    2.17    0.14 
  -9   6  -2    2.14    0.15 
  -9   6  -2    2.30    0.18 
  -9   6  -2    2.33    0.17 
   9  -6   2    2.24    0.21 
   9  -6   2    2.08    0.11 
 -10   6  -2    0.29    0.08 
 -10   6  -2    0.52    0.08 
  10  -6   2    0.38    0.12 
  10  -6   2    0.46    0.08 
 -11   6  -2    0.07    0.08 
 -11   6  -2    0.18    0.08 
  11  -6   2    0.08    0.12 
 -12   6  -2    1.91    0.19 
  12  -6   2    1.76    0.24 
 -13   6  -2    0.68    0.13 
  13  -6   2    0.50    0.17 
 -14   6  -2   20.11    0.82 
  14  -6   2   19.56    0.87 
 -15   6  -2   17.24    0.74 
  12   5  -2    2.16    0.21 
  11   5  -2   11.89    0.60 
  11   5  -2   11.02    0.49 
  10   5  -2    7.43    0.46 
  10   5  -2    7.95    0.37 
  10   5  -2    7.79    0.39 
   9   5  -2    8.05    0.37 
   9   5  -2    7.95    0.45 
   9   5  -2    7.64    0.38 
  -9  -5   2    7.66    0.41 
   8   5  -2    8.52    0.45 
   8   5  -2    8.38    0.39 
   8   5  -2    8.44    0.39 
   8   5  -2    9.40    0.42 
  -8  -5   2    8.25    0.40 
  -8  -5   2    8.26    0.40 
   7   5  -2    0.51    0.09 
   7   5  -2    0.47    0.09 
   7   5  -2    0.46    0.13 
   7   5  -2    0.45    0.10 
   7   5  -2    0.50    0.09 
  -7  -5   2    0.44    0.10 
  -7  -5   2    0.34    0.09 
   6   5  -2   26.62    1.01 
   6   5  -2   27.65    1.03 
   6   5  -2   27.67    1.03 
   6   5  -2   28.97    1.07 
   6   5  -2   28.21    1.00 
  -6  -5   2   27.78    1.03 
  -6  -5   2   25.78    1.02 
   5   5  -2    1.70    0.16 
   5   5  -2    1.86    0.15 
   5   5  -2    1.59    0.12 
   5   5  -2    1.56    0.18 
   5   5  -2    1.92    0.15 
  -5  -5   2    1.74    0.14 
  -5  -5   2    1.66    0.13 
  -5  -5   2    1.99    0.15 
   4   5  -2   95.40    3.35 
   4   5  -2   96.19    3.37 
   4   5  -2  102.34    3.34 
   4   5  -2   96.39    3.39 
  -4  -5   2   92.15    3.34 
  -4  -5   2  103.61    3.37 
  -4  -5   2   87.49    3.35 
   3   5  -2   93.45    3.35 
   3   5  -2   97.39    3.33 
   3   5  -2   95.32    3.39 
   3   5  -2   97.58    3.34 
   3   5  -2   98.32    3.35 
   3   5  -2   97.62    3.31 
  -3  -5   2   98.39    3.34 
  -3  -5   2   88.62    3.32 
   2   5  -2   96.04    3.11 
   2   5  -2   95.00    3.11 
   2   5  -2   96.56    3.11 
   2   5  -2   88.68    3.10 
   2   5  -2   78.15    3.09 
  -2  -5   2   87.98    3.10 
  -2  -5   2   85.10    3.07 
  -2  -5   2   85.15    3.07 
   1   5  -2   32.74    1.17 
   1   5  -2   32.17    1.17 
   1   5  -2   32.41    1.17 
   1   5  -2   33.73    1.16 
   1   5  -2   31.26    1.17 
  -1  -5   2   34.16    1.16 
   0   5  -2    6.37    0.26 
   0   5  -2    6.16    0.25 
   0   5  -2    6.63    0.27 
   0   5  -2    6.59    0.27 
   0  -5   2    6.74    0.26 
   0  -5   2    6.72    0.27 
  -1   5  -2  100.04    3.48 
  -1   5  -2  103.60    3.49 
  -1   5  -2  103.41    3.49 
  -1   5  -2  105.28    3.49 
   1  -5   2   94.53    3.48 
   1  -5   2  103.47    3.49 
   1  -5   2   95.88    3.48 
  -2   5  -2   98.39    3.53 
  -2   5  -2  101.73    3.54 
  -2   5  -2  100.49    3.54 
  -2   5  -2  102.49    3.54 
   2  -5   2  105.78    3.55 
   2  -5   2  102.54    3.54 
   2  -5   2  106.39    3.55 
  -3   5  -2   51.56    1.74 
  -3   5  -2   50.95    1.75 
  -3   5  -2   52.03    1.75 
  -3   5  -2   48.97    1.77 
  -3   5  -2   48.15    1.75 
   3  -5   2   51.13    1.77 
   3  -5   2   49.63    1.75 
   3  -5   2   49.61    1.74 
  -4   5  -2    5.08    0.21 
  -4   5  -2    4.87    0.20 
  -4   5  -2    4.87    0.19 
  -4   5  -2    4.96    0.21 
   4  -5   2    4.97    0.19 
   4  -5   2    4.83    0.24 
   4  -5   2    5.04    0.21 
  -5   5  -2   21.55    0.77 
  -5   5  -2   21.73    0.78 
  -5   5  -2   21.62    0.78 
   5  -5   2   22.66    0.81 
   5  -5   2   21.22    0.79 
   5  -5   2   22.27    0.77 
  -6   5  -2   57.12    1.95 
  -6   5  -2   56.18    1.96 
  -6   5  -2   55.07    1.96 
   6  -5   2   55.25    1.94 
   6  -5   2   57.27    1.97 
   6  -5   2   55.60    1.99 
  -7   5  -2   28.45    1.01 
  -7   5  -2   28.10    0.99 
  -7   5  -2   27.56    1.01 
   7  -5   2   27.21    1.04 
   7  -5   2   27.45    0.98 
   7  -5   2   28.18    1.01 
   7  -5   2   28.95    0.99 
  -8   5  -2   26.78    0.99 
  -8   5  -2   28.22    0.99 
  -8   5  -2   26.80    0.98 
  -8   5  -2   27.48    0.97 
   8  -5   2   26.83    1.02 
   8  -5   2   27.13    0.96 
   8  -5   2   27.15    0.99 
   8  -5   2   26.70    0.96 
  -9   5  -2   13.93    0.54 
  -9   5  -2   14.26    0.56 
  -9   5  -2   13.25    0.55 
  -9   5  -2   15.08    0.56 
   9  -5   2   14.50    0.60 
   9  -5   2   13.94    0.57 
   9  -5   2   14.09    0.53 
 -10   5  -2    0.39    0.08 
 -10   5  -2    0.39    0.09 
  10  -5   2    0.24    0.12 
  10  -5   2    0.24    0.06 
 -11   5  -2    3.41    0.22 
  11  -5   2    3.09    0.21 
  11  -5   2    2.96    0.26 
 -12   5  -2    5.00    0.29 
  12  -5   2    4.90    0.34 
 -13   5  -2   16.38    0.69 
  13  -5   2   16.41    0.73 
 -14   5  -2    0.06    0.11 
  14  -5   2   -0.02    0.15 
 -15   5  -2    0.61    0.15 
  12   4  -2    2.01    0.20 
  12   4  -2    2.00    0.31 
  11   4  -2   10.51    0.51 
  11   4  -2   10.50    0.56 
  11   4  -2   11.29    0.47 
  10   4  -2   38.51    1.40 
  10   4  -2   38.79    1.49 
  10   4  -2   37.31    1.42 
 -10  -4   2   39.15    1.45 
   9   4  -2    8.69    0.48 
   9   4  -2    9.40    0.43 
   9   4  -2   10.00    0.42 
  -9  -4   2    9.00    0.43 
  -9  -4   2   10.10    0.45 
   8   4  -2    8.49    0.42 
   8   4  -2    7.37    0.36 
   8   4  -2    7.79    0.36 
   8   4  -2    7.23    0.35 
   8   4  -2    7.90    0.36 
  -8  -4   2    7.70    0.37 
  -8  -4   2    7.64    0.36 
   7   4  -2    2.08    0.17 
   7   4  -2    1.74    0.18 
   7   4  -2    2.13    0.17 
   7   4  -2    2.02    0.16 
   7   4  -2    2.01    0.21 
  -7  -4   2    2.05    0.16 
  -7  -4   2    2.13    0.17 
   6   4  -2    0.43    0.08 
   6   4  -2    0.36    0.08 
   6   4  -2    0.47    0.08 
   6   4  -2    0.49    0.11 
   6   4  -2    0.48    0.08 
  -6  -4   2    0.49    0.08 
  -6  -4   2    0.29    0.07 
   5   4  -2    4.23    0.19 
   5   4  -2    3.59    0.19 
   5   4  -2    4.25    0.21 
   5   4  -2    3.89    0.21 
  -5  -4   2    3.86    0.20 
  -5  -4   2    3.65    0.19 
  -5  -4   2    3.94    0.20 
   4   4  -2    7.96    0.32 
   4   4  -2    8.57    0.35 
   4   4  -2    8.56    0.34 
  -4  -4   2    8.06    0.34 
  -4  -4   2    8.27    0.34 
  -4  -4   2    8.35    0.33 
   3   4  -2   60.44    2.12 
   3   4  -2   63.89    2.13 
   3   4  -2   60.27    2.10 
   3   4  -2   58.71    2.12 
   3   4  -2   56.91    2.11 
  -3  -4   2   60.28    2.12 
  -3  -4   2   63.60    2.12 
  -3  -4   2   60.02    2.11 
   2   4  -2    0.14    0.03 
   2   4  -2   -0.02    0.03 
   2   4  -2    0.05    0.04 
   2   4  -2    0.01    0.04 
   2   4  -2    0.09    0.04 
  -2  -4   2    0.10    0.03 
  -2  -4   2    0.01    0.03 
   1   4  -2    3.85    0.17 
   1   4  -2    3.71    0.17 
   1   4  -2    3.55    0.16 
   1   4  -2    4.04    0.17 
   1   4  -2    3.96    0.17 
  -1  -4   2    3.68    0.16 
   0   4  -2    2.80    0.13 
   0   4  -2    3.03    0.12 
   0   4  -2    2.74    0.13 
   0   4  -2    2.93    0.13 
   0  -4   2    2.98    0.13 
   0  -4   2    2.80    0.13 
  -1   4  -2   19.42    0.76 
  -1   4  -2   22.20    0.78 
  -1   4  -2   23.31    0.77 
  -1   4  -2   22.03    0.78 
  -1   4  -2   21.64    0.77 
   1  -4   2   22.21    0.77 
   1  -4   2   22.91    0.77 
   1  -4   2   22.09    0.78 
  -2   4  -2    6.38    0.24 
  -2   4  -2    6.79    0.25 
  -2   4  -2    6.24    0.24 
   2  -4   2    6.62    0.25 
   2  -4   2    6.45    0.23 
   2  -4   2    6.39    0.25 
  -3   4  -2  127.20    4.34 
  -3   4  -2  123.82    4.32 
  -3   4  -2  130.02    4.32 
  -3   4  -2  122.91    4.31 
  -3   4  -2  121.46    4.32 
   3  -4   2  125.89    4.34 
   3  -4   2  127.06    4.32 
  -4   4  -2   10.54    0.40 
  -4   4  -2   11.00    0.39 
  -4   4  -2   10.86    0.43 
  -4   4  -2   10.70    0.40 
   4  -4   2   11.56    0.42 
   4  -4   2   10.66    0.38 
   4  -4   2   10.77    0.40 
   4  -4   2   10.82    0.39 
  -5   4  -2   15.98    0.58 
  -5   4  -2   15.83    0.58 
  -5   4  -2   16.16    0.57 
  -5   4  -2   16.41    0.57 
   5  -4   2   16.06    0.57 
   5  -4   2   15.73    0.61 
   5  -4   2   15.51    0.58 
   5  -4   2   16.22    0.57 
  -6   4  -2   14.76    0.51 
  -6   4  -2   14.01    0.53 
  -6   4  -2   13.97    0.53 
   6  -4   2   14.20    0.51 
   6  -4   2   14.40    0.56 
   6  -4   2   13.67    0.51 
   6  -4   2   14.03    0.53 
  -7   4  -2   31.09    1.11 
  -7   4  -2   30.18    1.10 
  -7   4  -2   30.86    1.10 
  -7   4  -2   30.70    1.09 
   7  -4   2   30.61    1.09 
   7  -4   2   30.96    1.14 
   7  -4   2   31.30    1.09 
  -8   4  -2    0.24    0.06 
  -8   4  -2    0.06    0.05 
  -8   4  -2    0.20    0.06 
  -8   4  -2    0.21    0.06 
   8  -4   2    0.10    0.09 
   8  -4   2    0.17    0.05 
   8  -4   2    0.16    0.05 
  -9   4  -2  113.07    3.91 
  -9   4  -2  109.36    3.91 
  -9   4  -2  116.24    3.92 
   9  -4   2  109.04    3.90 
   9  -4   2  113.24    3.95 
 -10   4  -2    0.25    0.08 
  10  -4   2    0.27    0.08 
  10  -4   2    0.20    0.12 
 -11   4  -2    7.04    0.35 
  11  -4   2    7.29    0.34 
  11  -4   2    6.85    0.38 
 -12   4  -2    2.31    0.20 
  12  -4   2    2.21    0.26 
 -13   4  -2    3.72    0.27 
  13  -4   2    3.61    0.32 
 -14   4  -2   -0.08    0.09 
  14  -4   2   -0.04    0.16 
 -15   4  -2   30.60    1.20 
  13   3  -2    3.39    0.31 
  13   3  -2    3.66    0.39 
  13   3  -2    3.63    0.23 
  12   3  -2   25.68    0.98 
  12   3  -2   27.32    1.09 
  12   3  -2   25.54    1.03 
  11   3  -2   23.05    0.92 
  11   3  -2   23.29    0.97 
  11   3  -2   23.39    0.88 
 -11  -3   2   22.61    0.92 
  10   3  -2    0.04    0.11 
  10   3  -2    0.04    0.08 
  10   3  -2    0.18    0.12 
 -10  -3   2    0.02    0.08 
   9   3  -2    1.75    0.22 
   9   3  -2    1.85    0.19 
   9   3  -2    1.81    0.17 
   9   3  -2    1.45    0.16 
   9   3  -2    1.62    0.19 
  -9  -3   2    2.03    0.18 
  -9  -3   2    1.54    0.18 
   8   3  -2    9.48    0.41 
   8   3  -2    9.37    0.41 
   8   3  -2    8.94    0.40 
   8   3  -2    9.02    0.39 
   8   3  -2    8.46    0.44 
  -8  -3   2    9.62    0.41 
  -8  -3   2    9.41    0.41 
   7   3  -2    7.91    0.34 
   7   3  -2    6.70    0.33 
   7   3  -2    7.32    0.37 
   7   3  -2    7.32    0.33 
   7   3  -2    7.68    0.32 
  -7  -3   2    7.87    0.34 
  -7  -3   2    6.98    0.33 
   6   3  -2   14.09    0.53 
   6   3  -2   13.34    0.54 
   6   3  -2   13.87    0.54 
   6   3  -2   13.51    0.52 
  -6  -3   2   13.21    0.53 
  -6  -3   2   13.70    0.54 
   5   3  -2  140.46    4.74 
   5   3  -2  139.88    4.76 
   5   3  -2  137.56    4.76 
   5   3  -2  135.98    4.74 
  -5  -3   2  131.37    4.75 
  -5  -3   2  132.65    4.75 
  -5  -3   2  141.69    4.76 
   4   3  -2    0.27    0.05 
   4   3  -2    0.33    0.06 
   4   3  -2    0.24    0.05 
   4   3  -2    0.32    0.06 
   4   3  -2    0.18    0.05 
  -4  -3   2    0.25    0.05 
  -4  -3   2    0.42    0.07 
  -4  -3   2    0.30    0.06 
   3   3  -2  205.04    7.28 
   3   3  -2  218.04    7.28 
   3   3  -2  220.01    7.28 
   3   3  -2  216.75    7.26 
   3   3  -2  221.09    7.28 
  -3  -3   2  203.49    7.28 
  -3  -3   2  220.64    7.28 
  -3  -3   2  184.69    7.31 
   2   3  -2   69.28    2.49 
   2   3  -2   69.27    2.47 
   2   3  -2   71.83    2.49 
   2   3  -2   76.46    2.48 
   2   3  -2   72.71    2.49 
  -2  -3   2   67.26    2.49 
  -2  -3   2   75.20    2.50 
   1   3  -2   74.06    2.60 
   1   3  -2   73.91    2.60 
  -1  -3   2   76.44    2.60 
  -1  -3   2   76.28    2.60 
   0   3  -2  242.05    8.73 
   0   3  -2  260.56    8.77 
   0   3  -2  251.27    8.73 
   0   3  -2  260.27    8.77 
   0  -3   2  251.33    8.75 
   0  -3   2  258.12    8.75 
   0  -3   2  252.19    8.72 
  -1   3  -2  437.14   15.92 
  -1   3  -2  458.93   15.97 
  -1   3  -2  472.91   15.92 
  -1   3  -2  474.58   15.93 
   1  -3   2  477.01   15.96 
   1  -3   2  455.95   15.94 
  -2   3  -2   97.00    3.41 
  -2   3  -2  102.42    3.40 
  -2   3  -2   98.23    3.40 
  -2   3  -2   97.55    3.40 
  -2   3  -2   97.05    3.42 
   2  -3   2   99.79    3.42 
   2  -3   2  100.38    3.41 
  -3   3  -2  226.07    7.40 
  -3   3  -2  208.89    7.39 
  -3   3  -2  213.05    7.41 
  -3   3  -2  211.83    7.38 
   3  -3   2  214.50    7.40 
   3  -3   2  216.69    7.39 
   3  -3   2  212.30    7.38 
  -4   3  -2  117.98    4.02 
  -4   3  -2  117.31    4.03 
  -4   3  -2  115.64    4.02 
  -4   3  -2  118.28    4.06 
   4  -3   2  114.93    4.03 
   4  -3   2  113.72    4.05 
   4  -3   2  119.30    4.01 
  -5   3  -2   11.65    0.43 
  -5   3  -2   11.45    0.43 
  -5   3  -2   11.28    0.43 
  -5   3  -2   11.99    0.42 
   5  -3   2   11.81    0.43 
   5  -3   2   11.41    0.46 
   5  -3   2   11.64    0.42 
  -6   3  -2    5.15    0.23 
  -6   3  -2    5.65    0.22 
  -6   3  -2    5.21    0.22 
  -6   3  -2    5.29    0.21 
   6  -3   2    5.26    0.23 
   6  -3   2    5.00    0.21 
   6  -3   2    5.18    0.26 
  -7   3  -2   16.27    0.61 
  -7   3  -2   17.06    0.62 
  -7   3  -2   17.28    0.63 
  -7   3  -2   16.48    0.62 
   7  -3   2   16.87    0.66 
   7  -3   2   16.54    0.63 
   7  -3   2   16.47    0.61 
  -8   3  -2   13.03    0.51 
  -8   3  -2   12.90    0.51 
  -8   3  -2   13.04    0.51 
   8  -3   2   12.41    0.54 
   8  -3   2   12.72    0.51 
   8  -3   2   14.14    0.49 
  -9   3  -2  101.35    3.59 
  -9   3  -2  102.38    3.59 
  -9   3  -2   95.76    3.66 
   9  -3   2  108.13    3.60 
   9  -3   2  104.87    3.62 
 -10   3  -2   14.45    0.60 
  10  -3   2   14.25    0.63 
  10  -3   2   15.84    0.61 
 -11   3  -2    1.90    0.18 
  11  -3   2    1.67    0.19 
  11  -3   2    1.99    0.23 
 -12   3  -2    0.73    0.12 
  12  -3   2    0.63    0.12 
  12  -3   2    0.56    0.16 
 -13   3  -2   29.00    1.12 
  13  -3   2   28.79    1.16 
 -14   3  -2   32.74    1.27 
  14  -3   2   32.67    1.31 
  14   2  -2   12.46    0.59 
  14   2  -2   11.90    0.48 
  13   2  -2   -0.15    0.13 
  13   2  -2    0.21    0.14 
  13   2  -2    0.07    0.08 
  12   2  -2    3.08    0.29 
  12   2  -2    2.21    0.19 
  12   2  -2    2.58    0.27 
 -12  -2   2    2.60    0.24 
  11   2  -2    0.70    0.15 
  11   2  -2    0.57    0.14 
  11   2  -2    0.93    0.16 
 -11  -2   2    0.61    0.12 
  10   2  -2   16.41    0.68 
  10   2  -2   16.44    0.64 
  10   2  -2   17.25    0.71 
 -10  -2   2   16.30    0.67 
 -10  -2   2   16.16    0.67 
   9   2  -2   11.83    0.49 
   9   2  -2   12.46    0.52 
   9   2  -2   11.74    0.50 
   9   2  -2   12.63    0.56 
   9   2  -2   12.41    0.52 
  -9  -2   2   12.22    0.52 
  -9  -2   2   12.34    0.52 
   8   2  -2    0.11    0.08 
   8   2  -2    0.08    0.06 
   8   2  -2    0.19    0.10 
   8   2  -2    0.08    0.08 
   8   2  -2    0.15    0.07 
  -8  -2   2    0.15    0.07 
  -8  -2   2    0.20    0.07 
   7   2  -2   30.86    1.13 
   7   2  -2   28.58    1.12 
   7   2  -2   31.83    1.11 
   7   2  -2   31.19    1.12 
  -7  -2   2   30.63    1.13 
  -7  -2   2   31.67    1.13 
   6   2  -2    0.31    0.06 
   6   2  -2    0.36    0.07 
   6   2  -2    0.50    0.09 
   6   2  -2    0.26    0.06 
  -6  -2   2    0.32    0.06 
  -6  -2   2    0.33    0.06 
   5   2  -2   15.53    0.56 
   5   2  -2   14.26    0.56 
   5   2  -2   14.83    0.56 
   5   2  -2   14.64    0.56 
  -5  -2   2   15.17    0.56 
   4   2  -2  251.31    8.66 
   4   2  -2  259.08    8.66 
   4   2  -2  230.54    8.64 
  -4  -2   2  264.15    8.66 
  -4  -2   2  274.96    8.72 
  -4  -2   2  228.11    8.65 
   3   2  -2   49.96    1.88 
   3   2  -2   55.44    1.88 
   3   2  -2   55.64    1.89 
   3   2  -2   54.95    1.89 
   3   2  -2   53.29    1.88 
  -3  -2   2   53.32    1.88 
  -3  -2   2   53.44    1.88 
  -3  -2   2   56.49    1.88 
  -3  -2   2   53.51    1.88 
   2   2  -2  195.04    6.67 
   2   2  -2  166.99    6.65 
   2   2  -2  206.66    6.73 
   2   2  -2  194.94    6.66 
  -2  -2   2  198.83    6.68 
  -2  -2   2  194.09    6.69 
  -2  -2   2  197.59    6.71 
  -2  -2   2  193.88    6.65 
   1   2  -2    2.93    0.12 
   1   2  -2    2.79    0.12 
   1   2  -2    2.95    0.12 
  -1  -2   2    3.02    0.12 
  -1  -2   2    2.88    0.12 
  -1  -2   2    2.75    0.11 
   0   2  -2   35.36    1.22 
   0   2  -2   35.73    1.22 
   0   2  -2   33.66    1.21 
   0   2  -2   35.43    1.21 
   0   2  -2   35.63    1.22 
   0  -2   2   35.55    1.22 
  -1   2  -2  134.02    4.58 
  -1   2  -2  135.93    4.57 
  -1   2  -2  133.62    4.60 
   1  -2   2  129.76    4.58 
   1  -2   2  131.76    4.60 
   1  -2   2  133.77    4.58 
  -2   2  -2  569.57   20.18 
  -2   2  -2  589.23   20.23 
   2  -2   2  574.12   20.22 
   2  -2   2  609.68   20.19 
  -3   2  -2   90.37    3.10 
  -3   2  -2   91.04    3.11 
  -3   2  -2   90.42    3.10 
  -3   2  -2   90.30    3.12 
   3  -2   2   92.02    3.13 
   3  -2   2   86.41    3.11 
  -4   2  -2    0.90    0.05 
  -4   2  -2    0.83    0.07 
  -4   2  -2    0.89    0.07 
  -4   2  -2    0.86    0.08 
   4  -2   2    0.92    0.05 
   4  -2   2    1.03    0.08 
   4  -2   2    0.95    0.10 
  -5   2  -2  120.22    4.31 
  -5   2  -2  126.11    4.32 
  -5   2  -2  120.22    4.31 
  -5   2  -2  126.32    4.33 
  -5   2  -2  128.98    4.32 
   5  -2   2  127.22    4.33 
   5  -2   2  124.34    4.31 
   5  -2   2  127.11    4.35 
  -6   2  -2   51.36    1.82 
  -6   2  -2   51.75    1.84 
  -6   2  -2   51.41    1.84 
  -6   2  -2   53.52    1.83 
   6  -2   2   53.52    1.82 
   6  -2   2   50.38    1.86 
   6  -2   2   54.34    1.85 
  -7   2  -2   92.56    3.25 
  -7   2  -2   98.67    3.25 
  -7   2  -2   92.02    3.25 
   7  -2   2   91.95    3.26 
   7  -2   2   92.30    3.27 
   7  -2   2   91.67    3.23 
  -8   2  -2  149.17    5.07 
  -8   2  -2  147.49    5.07 
  -8   2  -2  142.30    5.07 
   8  -2   2  145.12    5.08 
   8  -2   2  145.26    5.10 
   8  -2   2  146.90    5.05 
  -9   2  -2    0.14    0.08 
   9  -2   2    0.11    0.08 
   9  -2   2    0.08    0.11 
 -10   2  -2    8.03    0.38 
  10  -2   2    8.58    0.40 
  10  -2   2    8.13    0.41 
 -11   2  -2    0.59    0.11 
  11  -2   2    0.54    0.15 
  11  -2   2    0.47    0.11 
 -12   2  -2    0.02    0.09 
  12  -2   2    0.04    0.10 
  12  -2   2    0.04    0.13 
 -13   2  -2    0.02    0.10 
  13  -2   2    0.04    0.15 
 -14   2  -2   17.04    0.75 
  14  -2   2   17.75    0.80 
  14   1  -2    0.54    0.09 
  14   1  -2    0.57    0.17 
  14   1  -2    0.52    0.16 
  13   1  -2    3.88    0.23 
  13   1  -2    3.90    0.32 
  13   1  -2    3.83    0.32 
  12   1  -2    0.67    0.16 
  12   1  -2    0.66    0.15 
  12   1  -2    0.67    0.10 
 -12  -1   2    0.60    0.12 
  11   1  -2   50.61    1.90 
  11   1  -2   52.44    1.85 
  11   1  -2   51.93    1.93 
 -11  -1   2   53.16    1.90 
  10   1  -2   77.97    2.71 
  10   1  -2   74.53    2.75 
  10   1  -2   78.44    2.73 
  10   1  -2   76.54    2.69 
 -10  -1   2   74.43    2.73 
 -10  -1   2   77.83    2.73 
   9   1  -2   26.91    1.01 
   9   1  -2   26.80    1.00 
   9   1  -2   26.47    1.00 
   9   1  -2   27.74    1.04 
   9   1  -2   26.32    0.98 
  -9  -1   2   27.16    1.01 
  -9  -1   2   26.32    1.01 
   8   1  -2   49.84    1.80 
   8   1  -2   52.37    1.78 
   8   1  -2   49.25    1.80 
   8   1  -2   52.27    1.80 
  -8  -1   2   50.88    1.80 
  -8  -1   2   47.45    1.80 
   7   1  -2   12.15    0.46 
   7   1  -2   12.38    0.47 
   7   1  -2   11.80    0.48 
   7   1  -2   11.42    0.47 
  -7  -1   2   11.22    0.47 
  -7  -1   2   12.25    0.48 
   6   1  -2    6.91    0.31 
   6   1  -2    7.31    0.31 
   6   1  -2    7.48    0.30 
  -6  -1   2    7.10    0.31 
  -6  -1   2    7.51    0.31 
   5   1  -2  110.46    3.78 
   5   1  -2  106.40    3.79 
   5   1  -2  108.29    3.80 
   5   1  -2  110.24    3.79 
  -5  -1   2  106.61    3.80 
  -5  -1   2  111.80    3.79 
  -5  -1   2  110.32    3.79 
   4   1  -2  509.53   17.05 
   4   1  -2  461.94   17.03 
   4   1  -2  499.28   17.10 
  -4  -1   2  532.81   17.15 
  -4  -1   2  470.86   17.03 
  -4  -1   2  504.60   17.11 
  -4  -1   2  480.54   17.06 
   3   1  -2  137.51    4.51 
   3   1  -2  140.15    4.50 
   3   1  -2  119.04    4.50 
   3   1  -2  122.41    4.50 
  -3  -1   2  129.17    4.50 
  -3  -1   2  137.44    4.50 
  -3  -1   2  127.95    4.50 
   2   1  -2   10.29    0.40 
   2   1  -2   10.83    0.40 
   2   1  -2   11.06    0.40 
   2   1  -2   11.13    0.40 
  -2  -1   2   11.33    0.40 
  -2  -1   2   11.52    0.40 
  -2  -1   2   10.79    0.40 
   1   1  -2  618.22   20.73 
   1   1  -2  584.45   20.77 
   1   1  -2  594.35   20.72 
  -1  -1   2  619.61   20.72 
  -1  -1   2  596.20   20.71 
   0   1  -2  104.84    3.58 
   0   1  -2  104.57    3.57 
   0   1  -2  105.98    3.58 
   0   1  -2   98.48    3.59 
   0  -1   2  105.23    3.58 
  -1   1  -2   16.33    0.61 
  -1   1  -2   17.10    0.61 
   1  -1   2   18.01    0.61 
   1  -1   2   17.21    0.61 
  -2   1  -2   13.85    0.47 
  -2   1  -2   13.29    0.49 
  -2   1  -2   12.11    0.48 
  -2   1  -2   12.94    0.47 
   2  -1   2   13.63    0.49 
   2  -1   2   13.83    0.49 
  -3   1  -2    9.82    0.37 
  -3   1  -2   10.63    0.39 
  -3   1  -2   10.69    0.39 
  -3   1  -2   10.48    0.38 
   3  -1   2    9.79    0.37 
   3  -1   2   10.03    0.37 
   3  -1   2   10.84    0.39 
  -4   1  -2   68.89    2.43 
  -4   1  -2   68.98    2.40 
  -4   1  -2   74.18    2.41 
  -4   1  -2   68.58    2.43 
  -4   1  -2   70.58    2.41 
  -4   1  -2   65.72    2.40 
   4  -1   2   70.52    2.43 
   4  -1   2   67.79    2.40 
   4  -1   2   69.56    2.43 
  -5   1  -2   77.86    2.56 
  -5   1  -2   75.82    2.56 
  -5   1  -2   75.06    2.56 
  -5   1  -2   71.85    2.58 
   5  -1   2   71.11    2.58 
   5  -1   2   72.19    2.58 
   5  -1   2   70.48    2.55 
  -6   1  -2  149.63    5.13 
  -6   1  -2  151.67    5.13 
  -6   1  -2  150.88    5.13 
   6  -1   2  143.99    5.14 
   6  -1   2  150.32    5.15 
   6  -1   2  142.20    5.11 
  -7   1  -2   23.88    0.88 
  -7   1  -2   23.63    0.89 
  -7   1  -2   23.34    0.88 
   7  -1   2   23.16    0.91 
   7  -1   2   26.01    0.91 
   7  -1   2   24.22    0.87 
  -8   1  -2    2.72    0.18 
  -8   1  -2    2.85    0.18 
  -8   1  -2    2.78    0.18 
   8  -1   2    2.75    0.22 
   8  -1   2    3.01    0.17 
   8  -1   2    3.03    0.21 
  -9   1  -2    2.76    0.20 
   9  -1   2    2.84    0.24 
   9  -1   2    3.30    0.23 
 -10   1  -2   13.29    0.57 
  10  -1   2   13.93    0.61 
  10  -1   2   14.47    0.61 
 -11   1  -2    2.87    0.23 
  11  -1   2    3.03    0.25 
  11  -1   2    2.96    0.27 
 -12   1  -2    3.15    0.26 
  12  -1   2    3.88    0.30 
  12  -1   2    3.77    0.32 
 -13   1  -2    7.89    0.42 
  13  -1   2    7.26    0.44 
  13  -1   2    8.19    0.46 
 -14   1  -2    1.75    0.24 
  14   0  -2    3.14    0.18 
  14   0  -2    2.78    0.30 
  14   0  -2    3.09    0.30 
  13   0  -2   18.98    0.80 
  13   0  -2   19.43    0.72 
  13   0  -2   19.13    0.82 
 -13   0   2   18.37    0.79 
  12   0  -2   64.25    2.33 
  12   0  -2   63.24    2.25 
  12   0  -2   63.30    2.31 
 -12   0   2   63.51    2.30 
  11   0  -2   35.10    1.23 
  11   0  -2   31.84    1.28 
  11   0  -2   36.23    1.25 
  11   0  -2   33.98    1.28 
 -11   0   2   31.87    1.26 
  10   0  -2    1.82    0.20 
  10   0  -2    1.83    0.20 
  10   0  -2    2.19    0.19 
  10   0  -2    1.77    0.15 
  10   0  -2    1.96    0.16 
 -10   0   2    2.13    0.18 
 -10   0   2    1.34    0.16 
   9   0  -2   89.15    3.03 
   9   0  -2   86.73    2.99 
   9   0  -2   85.34    2.98 
   9   0  -2   89.46    3.01 
   9   0  -2   86.19    3.00 
  -9   0   2   83.48    3.00 
  -9   0   2   75.84    2.99 
   8   0  -2    0.12    0.06 
   8   0  -2    0.19    0.06 
   8   0  -2    0.20    0.06 
  -8   0   2    0.34    0.07 
  -8   0   2    0.13    0.06 
   7   0  -2   41.47    1.53 
   7   0  -2   42.04    1.51 
   7   0  -2   42.31    1.51 
   7   0  -2   42.85    1.50 
  -7   0   2   43.27    1.51 
  -7   0   2   41.49    1.51 
   6   0  -2  141.21    4.81 
   6   0  -2  135.49    4.78 
   6   0  -2  141.22    4.79 
   6   0  -2  133.51    4.79 
  -6   0   2  138.65    4.79 
  -6   0   2  139.35    4.79 
   5   0  -2   62.04    2.21 
   5   0  -2   62.97    2.23 
   5   0  -2   63.86    2.21 
  -5   0   2   64.46    2.21 
  -5   0   2   60.92    2.22 
  -5   0   2   64.48    2.21 
  -5   0   2   64.10    2.21 
   4   0  -2   40.58    1.44 
   4   0  -2   40.84    1.43 
   4   0  -2   40.22    1.45 
   4   0  -2   41.00    1.43 
  -4   0   2   40.24    1.45 
  -4   0   2   41.40    1.43 
  -4   0   2   40.22    1.43 
  -4   0   2   42.20    1.44 
   3   0  -2    0.96    0.09 
   3   0  -2    0.90    0.07 
   3   0  -2    0.94    0.07 
  -3   0   2    0.93    0.07 
  -3   0   2    0.87    0.08 
  -3   0   2    0.92    0.07 
  -3   0   2    0.87    0.07 
   2   0  -2   87.06    3.05 
   2   0  -2   88.43    3.05 
   2   0  -2   85.38    3.05 
   2   0  -2   89.66    3.06 
  -2   0   2   91.00    3.05 
  -2   0   2   87.26    3.05 
  -2   0   2   89.17    3.06 
  -2   0   2   89.97    3.05 
   1   0  -2  198.82    6.87 
   1   0  -2  196.79    6.87 
   1   0  -2  194.69    6.86 
   1   0  -2  195.35    6.94 
   1   0  -2  211.57    6.87 
   1   0  -2  197.10    6.87 
  -1   0   2  204.24    6.87 
  -1   0   2  199.78    6.87 
  -1   0   2  194.99    6.86 
  -1   0   2  198.49    6.94 
  -1   0   2  197.49    6.88 
   0   0  -2   54.79    1.84 
   0   0  -2   52.61    1.86 
   0   0  -2   54.56    1.84 
   0   0  -2   47.83    1.84 
   0   0  -2   55.45    1.86 
   0   0   2   55.16    1.86 
   0   0   2   53.24    1.84 
   0   0   2   54.12    1.84 
   0   0   2   53.52    1.84 
  -1   0  -2   26.84    0.95 
  -1   0  -2   27.75    0.94 
  -1   0  -2   27.05    0.94 
  -1   0  -2   23.37    0.95 
   1   0   2   28.51    0.95 
   1   0   2   27.32    0.94 
   1   0   2   27.41    0.95 
   1   0   2   25.45    0.93 
   1   0   2   28.62    0.93 
  -2   0  -2   21.67    0.77 
  -2   0  -2   21.92    0.79 
  -2   0  -2   22.59    0.78 
  -2   0  -2   21.89    0.79 
  -2   0  -2   21.88    0.77 
   2   0   2   21.71    0.79 
   2   0   2   22.45    0.77 
   2   0   2   23.44    0.77 
   2   0   2   20.54    0.79 
  -3   0  -2  241.01    8.28 
  -3   0  -2  275.71    8.30 
  -3   0  -2  227.90    8.26 
  -3   0  -2  244.98    8.28 
  -3   0  -2  236.68    8.33 
   3   0   2  231.58    8.28 
   3   0   2  223.88    8.25 
   3   0   2  240.19    8.28 
  -4   0  -2    0.45    0.08 
  -4   0  -2    0.67    0.09 
  -4   0  -2    0.45    0.07 
  -4   0  -2    0.58    0.09 
  -4   0  -2    0.48    0.07 
   4   0   2    0.46    0.07 
   4   0   2    0.61    0.10 
   4   0   2    0.67    0.09 
  -5   0  -2    0.25    0.05 
  -5   0  -2    0.27    0.05 
  -5   0  -2    0.23    0.06 
  -5   0  -2    0.22    0.05 
   5   0   2    0.19    0.06 
   5   0   2    0.22    0.06 
   5   0   2    0.17    0.04 
  -6   0  -2    5.44    0.24 
  -6   0  -2    4.94    0.24 
  -6   0  -2    5.18    0.24 
   6   0   2    5.67    0.27 
   6   0   2    4.97    0.23 
   6   0   2    5.07    0.26 
  -7   0  -2    4.64    0.24 
  -7   0  -2    4.82    0.24 
  -7   0  -2    4.55    0.23 
   7   0   2    5.15    0.27 
   7   0   2    4.83    0.26 
   7   0   2    4.96    0.22 
  -8   0  -2    0.01    0.06 
  -8   0  -2    0.17    0.07 
   8   0   2    0.04    0.08 
   8   0   2    0.05    0.09 
  -9   0  -2    6.16    0.32 
   9   0   2    6.31    0.35 
   9   0   2    6.24    0.35 
 -10   0  -2   26.32    1.04 
  10   0   2   27.33    1.07 
  10   0   2   28.22    1.08 
 -11   0  -2    0.30    0.10 
  11   0   2    0.40    0.13 
  11   0   2    0.27    0.14 
 -12   0  -2   11.09    0.52 
  12   0   2   11.24    0.55 
  12   0   2   11.25    0.55 
 -13   0  -2    1.37    0.22 
  13   0   2    1.25    0.23 
  13   0   2    1.83    0.27 
  15  -1  -2   13.27    0.65 
  14  -1  -2    5.82    0.39 
  14  -1  -2    5.65    0.25 
  13  -1  -2   26.43    0.98 
  13  -1  -2   26.94    1.08 
  13  -1  -2   27.35    1.07 
  12  -1  -2   15.48    0.58 
  12  -1  -2   14.80    0.65 
  12  -1  -2   14.32    0.65 
  11  -1  -2    1.78    0.21 
  11  -1  -2    2.13    0.16 
  11  -1  -2    1.76    0.22 
  11  -1  -2    1.99    0.16 
  10  -1  -2    0.40    0.11 
  10  -1  -2    0.75    0.11 
  10  -1  -2    0.60    0.12 
  10  -1  -2    0.66    0.14 
  10  -1  -2    0.73    0.12 
 -10   1   2    0.79    0.14 
   9  -1  -2   22.93    0.85 
   9  -1  -2   22.46    0.86 
   9  -1  -2   21.98    0.84 
  -9   1   2   24.62    0.88 
   8  -1  -2    6.81    0.30 
   8  -1  -2    6.85    0.29 
   8  -1  -2    6.60    0.34 
   8  -1  -2    6.84    0.31 
  -8   1   2    7.18    0.31 
   7  -1  -2    1.83    0.12 
   7  -1  -2    1.89    0.13 
   7  -1  -2    1.73    0.13 
   7  -1  -2    1.51    0.16 
  -7   1   2    1.75    0.13 
   6  -1  -2   37.05    1.28 
   6  -1  -2   37.36    1.31 
   6  -1  -2   35.26    1.28 
  -6   1   2   32.02    1.28 
  -6   1   2   38.12    1.29 
   5  -1  -2  225.33    7.70 
   5  -1  -2  239.88    7.72 
   5  -1  -2  210.34    7.70 
   5  -1  -2  227.19    7.73 
  -5   1   2  218.80    7.70 
  -5   1   2  224.22    7.71 
  -5   1   2  218.81    7.72 
  -5   1   2  223.67    7.70 
   4  -1  -2   17.80    0.66 
   4  -1  -2   17.33    0.64 
   4  -1  -2   17.65    0.64 
  -4   1   2   17.57    0.64 
  -4   1   2   17.52    0.66 
  -4   1   2   17.54    0.64 
  -4   1   2   18.19    0.64 
   3  -1  -2   14.83    0.54 
   3  -1  -2   15.31    0.55 
   3  -1  -2   15.08    0.56 
  -3   1   2   15.14    0.54 
  -3   1   2   15.02    0.56 
  -3   1   2   15.05    0.54 
  -3   1   2   14.84    0.54 
   2  -1  -2  932.08   33.04 
   2  -1  -2  959.86   33.02 
   2  -1  -2  951.91   33.02 
   2  -1  -2  966.60   33.15 
  -2   1   2 1000.00   33.03 
  -2   1   2  954.14   33.01 
  -2   1   2  968.60   33.14 
  -2   1   2  963.48   33.04 
  -2   1   2  932.75   34.58 
  -2   1   2  962.56   33.05 
   1  -1  -2   57.71    2.07 
   1  -1  -2   59.82    2.08 
   1  -1  -2   59.22    2.07 
   1  -1  -2   59.99    2.09 
   1  -1  -2   61.76    2.07 
  -1   1   2   60.36    2.09 
  -1   1   2   61.14    2.07 
  -1   1   2   59.35    2.07 
  -1   1   2   61.31    2.08 
  -1   1   2   60.90    2.07 
  -1   1   2   57.40    2.07 
   0  -1  -2   40.37    1.29 
   0  -1  -2   37.09    1.29 
   0  -1  -2   38.77    1.31 
   0  -1  -2   37.83    1.30 
   0  -1  -2   39.76    1.29 
   0   1   2   36.01    1.31 
   0   1   2   34.42    1.28 
   0   1   2   38.54    1.29 
   0   1   2   38.84    1.29 
   0   1   2   33.18    1.30 
   0   1   2   32.90    1.28 
   0   1   2   36.91    1.29 
  -1  -1  -2   58.34    2.17 
  -1  -1  -2   65.57    2.18 
  -1  -1  -2   63.36    2.16 
  -1  -1  -2   63.90    2.16 
  -1  -1  -2   67.84    2.15 
  -1  -1  -2   62.48    2.17 
   1   1   2   63.65    2.17 
   1   1   2   61.57    2.16 
   1   1   2   64.55    2.15 
   1   1   2   56.28    2.17 
   1   1   2   58.99    2.14 
   1   1   2   60.29    2.15 
  -2  -1  -2    0.25    0.04 
  -2  -1  -2    0.22    0.05 
  -2  -1  -2    0.29    0.05 
  -2  -1  -2    0.33    0.05 
  -2  -1  -2    0.33    0.05 
   2   1   2    0.27    0.04 
   2   1   2    0.44    0.07 
   2   1   2    0.27    0.03 
   2   1   2    0.23    0.03 
   2   1   2    0.25    0.05 
  -3  -1  -2  197.37    6.73 
  -3  -1  -2  195.80    6.73 
  -3  -1  -2  197.24    6.73 
  -3  -1  -2  198.32    6.74 
  -3  -1  -2  189.45    6.75 
   3   1   2  201.47    6.74 
   3   1   2  195.72    6.72 
   3   1   2  196.76    6.73 
   3   1   2  185.01    6.75 
  -4  -1  -2   13.06    0.51 
  -4  -1  -2   13.68    0.51 
  -4  -1  -2   14.81    0.54 
  -4  -1  -2   13.60    0.52 
   4   1   2   13.38    0.53 
   4   1   2   13.06    0.54 
   4   1   2   13.25    0.48 
   4   1   2   13.17    0.48 
   4   1   2   14.85    0.51 
  -5  -1  -2    9.90    0.39 
  -5  -1  -2    9.68    0.38 
  -5  -1  -2    8.96    0.38 
   5   1   2    9.24    0.37 
   5   1   2    9.94    0.42 
   5   1   2   10.10    0.34 
   5   1   2    9.26    0.40 
   5   1   2    9.24    0.34 
  -6  -1  -2   11.76    0.47 
  -6  -1  -2   12.30    0.47 
  -6  -1  -2   11.79    0.47 
   6   1   2   11.82    0.42 
   6   1   2   11.54    0.50 
   6   1   2   11.89    0.46 
   6   1   2   11.34    0.42 
   6   1   2   11.61    0.49 
  -7  -1  -2   22.98    0.88 
  -7  -1  -2   22.75    0.87 
  -7  -1  -2   23.84    0.88 
   7   1   2   23.63    0.90 
   7   1   2   23.48    0.86 
   7   1   2   23.53    0.91 
  -8  -1  -2   13.88    0.57 
   8   1   2   13.40    0.60 
   8   1   2   14.14    0.59 
  -9  -1  -2   15.67    0.65 
   9   1   2   15.70    0.67 
   9   1   2   16.08    0.69 
 -10  -1  -2    3.28    0.24 
  10   1   2    3.20    0.27 
  10   1   2    3.56    0.28 
 -11  -1  -2    0.32    0.12 
  11   1   2    0.30    0.14 
  11   1   2    0.35    0.14 
 -12  -1  -2    4.65    0.32 
  12   1   2    4.63    0.35 
  12   1   2    4.56    0.35 
 -13  -1  -2   17.00    0.73 
  13   1   2   15.61    0.76 
  13   1   2   16.01    0.75 
  15  -2  -2    4.18    0.37 
  14  -2  -2   12.36    0.58 
  14  -2  -2   11.95    0.44 
 -14   2   2    9.27    0.59 
  13  -2  -2    0.23    0.07 
  13  -2  -2    0.09    0.14 
  13  -2  -2    0.17    0.11 
 -13   2   2   -0.05    0.09 
  12  -2  -2    2.87    0.26 
  12  -2  -2    3.20    0.24 
  12  -2  -2    3.15    0.19 
 -12   2   2    2.80    0.23 
  11  -2  -2    9.49    0.39 
  11  -2  -2    9.29    0.43 
  11  -2  -2    9.45    0.45 
 -11   2   2    9.29    0.43 
  10  -2  -2    0.08    0.07 
  10  -2  -2    0.17    0.07 
  10  -2  -2   -0.07    0.08 
  10  -2  -2    0.15    0.07 
  10  -2  -2   -0.03    0.11 
 -10   2   2    0.00    0.07 
 -10   2   2    0.13    0.07 
   9  -2  -2    2.31    0.17 
   9  -2  -2    2.22    0.15 
   9  -2  -2    2.22    0.21 
   9  -2  -2    2.61    0.16 
  -9   2   2    2.56    0.17 
  -9   2   2    2.56    0.17 
   8  -2  -2    0.12    0.05 
   8  -2  -2    0.07    0.05 
   8  -2  -2    0.03    0.05 
   8  -2  -2    0.01    0.09 
  -8   2   2    0.15    0.06 
  -8   2   2    0.10    0.05 
   7  -2  -2   51.35    1.83 
   7  -2  -2   51.61    1.86 
   7  -2  -2   51.79    1.83 
  -7   2   2   52.34    1.84 
   6  -2  -2    0.35    0.06 
   6  -2  -2    0.49    0.08 
   6  -2  -2    0.64    0.10 
  -6   2   2    0.58    0.09 
  -6   2   2    0.55    0.09 
   5  -2  -2   98.01    3.45 
   5  -2  -2   97.21    3.44 
   5  -2  -2  101.07    3.47 
  -5   2   2   99.53    3.47 
  -5   2   2  100.41    3.45 
  -5   2   2   99.70    3.45 
   4  -2  -2   34.67    1.22 
   4  -2  -2   34.69    1.22 
   4  -2  -2   34.40    1.22 
   4  -2  -2   34.00    1.21 
   4  -2  -2   35.91    1.25 
  -4   2   2   34.25    1.22 
  -4   2   2   35.04    1.22 
  -4   2   2   35.11    1.24 
  -4   2   2   33.97    1.21 
  -4   2   2   33.88    1.22 
   3  -2  -2   36.36    1.41 
   3  -2  -2   39.92    1.41 
   3  -2  -2   40.69    1.42 
   3  -2  -2   40.10    1.41 
   3  -2  -2   40.55    1.41 
   3  -2  -2   41.44    1.43 
  -3   2   2   40.40    1.41 
  -3   2   2   39.40    1.40 
  -3   2   2   41.67    1.41 
  -3   2   2   40.03    1.41 
  -3   2   2   40.29    1.41 
  -3   2   2   40.97    1.43 
  -3   2   2   42.19    1.41 
   2  -2  -2  197.11    7.66 
   2  -2  -2  231.85    7.69 
  -2   2   2  228.73    7.65 
  -2   2   2  237.70    7.71 
  -2   2   2  220.92    7.65 
  -2   2   2  197.47    7.68 
  -2   2   2  218.44    7.66 
  -2   2   2  219.68    7.70 
  -2   2   2  249.75    7.71 
   1  -2  -2    0.77    0.07 
   1  -2  -2    0.66    0.06 
   1  -2  -2    0.75    0.07 
   1  -2  -2    0.73    0.09 
  -1   2   2    0.70    0.05 
  -1   2   2    0.64    0.06 
  -1   2   2    0.59    0.06 
  -1   2   2    0.69    0.07 
  -1   2   2    0.69    0.07 
  -1   2   2    0.72    0.08 
  -1   2   2    0.97    0.08 
   0  -2  -2  313.28   10.64 
   0  -2  -2  285.08   10.56 
   0  -2  -2  285.39   10.65 
   0  -2  -2  328.53   10.65 
   0  -2  -2  268.15   10.59 
   0   2   2  300.30   10.68 
   0   2   2  338.72   10.64 
   0   2   2  315.86   10.59 
   0   2   2  302.61   10.63 
   0   2   2  322.49   10.63 
   0   2   2  315.97   10.65 
   0   2   2  311.14   10.62 
  -1  -2  -2    5.03    0.21 
  -1  -2  -2    4.74    0.20 
  -1  -2  -2    4.68    0.20 
  -1  -2  -2    4.52    0.20 
  -1  -2  -2    4.67    0.22 
   1   2   2    4.73    0.22 
   1   2   2    4.85    0.20 
   1   2   2    4.83    0.21 
   1   2   2    4.58    0.19 
   1   2   2    5.18    0.19 
  -2  -2  -2    7.01    0.28 
  -2  -2  -2    7.19    0.28 
  -2  -2  -2    6.92    0.29 
  -2  -2  -2    6.75    0.28 
  -2  -2  -2    6.96    0.30 
   2   2   2    7.29    0.29 
   2   2   2    7.11    0.29 
   2   2   2    6.12    0.26 
   2   2   2    7.40    0.31 
   2   2   2    7.44    0.28 
   2   2   2    6.92    0.27 
  -3  -2  -2    1.43    0.11 
  -3  -2  -2    1.52    0.10 
  -3  -2  -2    1.64    0.11 
  -3  -2  -2    1.33    0.12 
  -3  -2  -2    1.56    0.11 
   3   2   2    1.50    0.12 
   3   2   2    1.43    0.10 
   3   2   2    1.67    0.09 
   3   2   2    1.40    0.11 
   3   2   2    1.43    0.09 
  -4  -2  -2    3.88    0.19 
  -4  -2  -2    3.12    0.18 
  -4  -2  -2    3.82    0.18 
   4   2   2    3.98    0.16 
   4   2   2    3.87    0.20 
   4   2   2    3.75    0.18 
   4   2   2    3.72    0.22 
   4   2   2    3.63    0.16 
  -5  -2  -2   70.64    2.40 
  -5  -2  -2   68.88    2.40 
  -5  -2  -2   65.83    2.40 
   5   2   2   72.71    2.39 
   5   2   2   69.68    2.37 
   5   2   2   61.79    2.36 
   5   2   2   65.66    2.43 
   5   2   2   70.34    2.41 
  -6  -2  -2   93.08    3.21 
  -6  -2  -2   87.00    3.22 
  -6  -2  -2   93.04    3.22 
   6   2   2   87.53    3.17 
   6   2   2   87.48    3.17 
   6   2   2   96.25    3.23 
   6   2   2   98.45    3.21 
   6   2   2   91.64    3.26 
  -7  -2  -2   31.10    1.07 
  -7  -2  -2   25.66    1.01 
   7   2   2   27.70    1.05 
   7   2   2   25.54    0.95 
   7   2   2   26.06    0.95 
   7   2   2   27.02    1.02 
  -8  -2  -2    0.33    0.09 
   8   2   2    0.47    0.12 
   8   2   2    0.32    0.11 
  -9  -2  -2   10.36    0.47 
   9   2   2   10.10    0.48 
   9   2   2   10.25    0.51 
 -10  -2  -2   22.31    0.90 
  10   2   2   23.25    0.95 
  10   2   2   22.65    0.92 
 -11  -2  -2   16.78    0.73 
  11   2   2   17.28    0.78 
  11   2   2   17.74    0.75 
 -12  -2  -2   14.87    0.67 
  12   2   2   16.00    0.70 
  12   2   2   14.15    0.71 
  15  -3  -2    0.83    0.20 
 -15   3   2    1.15    0.22 
  14  -3  -2    0.34    0.16 
 -14   3   2    0.34    0.12 
  13  -3  -2    0.40    0.15 
  13  -3  -2    0.28    0.07 
 -13   3   2    0.29    0.11 
  12  -3  -2    6.82    0.38 
  12  -3  -2    6.32    0.34 
  12  -3  -2    7.06    0.30 
 -12   3   2    6.89    0.35 
  11  -3  -2   35.45    1.36 
  11  -3  -2   34.55    1.29 
  11  -3  -2   35.08    1.26 
 -11   3   2   35.65    1.30 
  10  -3  -2   17.50    0.74 
  10  -3  -2   17.11    0.66 
  10  -3  -2   17.70    0.68 
 -10   3   2   17.82    0.70 
 -10   3   2   17.76    0.69 
   9  -3  -2    8.50    0.35 
   9  -3  -2    8.92    0.37 
   9  -3  -2    8.35    0.42 
  -9   3   2    8.21    0.37 
  -9   3   2    8.73    0.37 
   8  -3  -2   12.26    0.53 
   8  -3  -2   12.33    0.46 
   8  -3  -2   11.90    0.48 
  -8   3   2   12.17    0.49 
  -8   3   2   11.99    0.48 
   7  -3  -2   14.80    0.57 
   7  -3  -2   15.81    0.61 
  -7   3   2   15.08    0.57 
  -7   3   2   13.79    0.57 
   6  -3  -2   64.70    2.27 
   6  -3  -2   67.06    2.28 
   6  -3  -2   66.07    2.32 
  -6   3   2   64.61    2.27 
  -6   3   2   63.58    2.28 
  -6   3   2   64.70    2.28 
   5  -3  -2    1.13    0.08 
   5  -3  -2    1.14    0.13 
   5  -3  -2    1.13    0.10 
  -5   3   2    0.88    0.09 
  -5   3   2    1.13    0.09 
  -5   3   2    0.94    0.13 
  -5   3   2    0.98    0.09 
  -5   3   2    1.04    0.09 
   4  -3  -2   12.36    0.47 
   4  -3  -2   13.79    0.51 
   4  -3  -2   12.67    0.48 
   4  -3  -2   12.42    0.48 
  -4   3   2   13.37    0.50 
  -4   3   2   12.69    0.48 
  -4   3   2   12.87    0.48 
  -4   3   2   12.49    0.48 
   3  -3  -2  131.67    4.57 
   3  -3  -2  130.87    4.56 
   3  -3  -2  140.80    4.59 
   3  -3  -2  130.84    4.56 
  -3   3   2  134.30    4.57 
  -3   3   2  133.46    4.58 
  -3   3   2  129.86    4.56 
  -3   3   2  126.76    4.57 
  -3   3   2  128.42    4.57 
  -3   3   2  134.72    4.56 
   2  -3  -2  392.99   14.63 
   2  -3  -2  446.76   14.64 
  -2   3   2  438.04   14.62 
  -2   3   2  412.81   14.56 
  -2   3   2  410.21   14.61 
  -2   3   2  482.34   14.70 
  -2   3   2  431.09   14.62 
  -2   3   2  432.21   14.57 
  -2   3   2  359.00   14.53 
   1  -3  -2  810.47   27.21 
   1  -3  -2  805.88   27.22 
  -1   3   2  775.38   27.16 
  -1   3   2  749.76   27.26 
  -1   3   2  822.38   27.17 
  -1   3   2  796.24   27.20 
  -1   3   2  792.28   27.15 
  -1   3   2  786.27   27.21 
  -1   3   2  749.02   27.18 
   0  -3  -2   24.37    0.87 
   0  -3  -2   22.77    0.88 
   0  -3  -2   24.67    0.86 
   0  -3  -2   24.87    0.86 
   0   3   2   22.61    0.85 
   0   3   2   24.40    0.87 
   0   3   2   22.85    0.88 
   0   3   2   25.78    0.86 
   0   3   2   24.39    0.88 
   0   3   2   23.62    0.86 
  -1  -3  -2    6.98    0.31 
  -1  -3  -2    6.94    0.29 
  -1  -3  -2    7.19    0.30 
  -1  -3  -2    7.02    0.30 
  -1  -3  -2    7.29    0.30 
   1   3   2    7.50    0.29 
   1   3   2    7.48    0.32 
   1   3   2    6.96    0.30 
   1   3   2    7.20    0.29 
   1   3   2    7.65    0.28 
  -2  -3  -2  184.07    6.06 
  -2  -3  -2  172.90    6.05 
  -2  -3  -2  203.08    6.06 
  -2  -3  -2  178.37    6.06 
  -2  -3  -2  183.49    6.08 
  -2  -3  -2  168.42    6.07 
   2   3   2  163.66    6.07 
   2   3   2  156.40    6.03 
   2   3   2  180.36    6.06 
   2   3   2  163.26    6.04 
   2   3   2  172.82    6.05 
  -3  -3  -2   26.41    0.93 
  -3  -3  -2   25.24    0.93 
  -3  -3  -2   27.16    0.93 
   3   3   2   23.68    0.91 
   3   3   2   26.18    0.94 
   3   3   2   23.11    0.91 
   3   3   2   26.28    0.92 
   3   3   2   25.78    0.93 
   3   3   2   25.73    0.96 
  -4  -3  -2   55.53    1.94 
  -4  -3  -2   49.08    1.94 
  -4  -3  -2   56.97    1.94 
   4   3   2   54.97    1.94 
   4   3   2   55.47    1.97 
   4   3   2   54.40    1.94 
   4   3   2   52.74    1.91 
   4   3   2   57.33    1.93 
   4   3   2   55.81    1.92 
  -5  -3  -2   27.04    0.99 
  -5  -3  -2   27.81    0.99 
   5   3   2   27.54    1.02 
   5   3   2   25.28    0.95 
   5   3   2   25.19    0.95 
   5   3   2   27.16    0.97 
   5   3   2   26.19    0.99 
   5   3   2   26.35    0.99 
  -6  -3  -2    8.49    0.40 
  -6  -3  -2   10.25    0.42 
   6   3   2    8.95    0.42 
   6   3   2    8.85    0.39 
   6   3   2    9.42    0.36 
   6   3   2    9.45    0.41 
   6   3   2    9.26    0.36 
   6   3   2    8.93    0.44 
  -7  -3  -2    4.41    0.26 
   7   3   2    4.26    0.27 
   7   3   2    4.56    0.20 
   7   3   2    4.43    0.30 
  -8  -3  -2   11.97    0.53 
   8   3   2   12.75    0.55 
   8   3   2   12.30    0.58 
   8   3   2   12.04    0.45 
  -9  -3  -2   30.34    1.18 
   9   3   2   30.26    1.18 
   9   3   2   31.91    1.23 
 -10  -3  -2    1.18    0.17 
  10   3   2    1.39    0.23 
  10   3   2    1.54    0.24 
 -11  -3  -2    1.12    0.17 
  11   3   2    1.40    0.20 
  11   3   2    1.04    0.19 
  11   3   2    1.44    0.24 
 -12  -3  -2    5.40    0.36 
  12   3   2    5.21    0.38 
  12   3   2    5.39    0.40 
  15  -4  -2    5.32    0.41 
 -15   4   2    5.54    0.35 
  14  -4  -2    2.92    0.29 
 -14   4   2    2.68    0.24 
  13  -4  -2   32.53    1.17 
  13  -4  -2   32.65    1.28 
 -13   4   2   33.40    1.25 
  12  -4  -2   17.55    0.70 
  12  -4  -2   16.56    0.63 
 -12   4   2   16.36    0.69 
  11  -4  -2    3.92    0.30 
  11  -4  -2    3.29    0.21 
  11  -4  -2    3.92    0.20 
 -11   4   2    3.64    0.24 
  10  -4  -2   20.37    0.87 
  10  -4  -2   20.35    0.80 
  10  -4  -2   21.39    0.78 
 -10   4   2   21.27    0.82 
 -10   4   2   22.27    0.82 
   9  -4  -2    6.53    0.27 
   9  -4  -2    6.31    0.35 
   9  -4  -2    6.28    0.30 
  -9   4   2    6.41    0.30 
  -9   4   2    5.94    0.30 
   8  -4  -2    0.05    0.04 
   8  -4  -2    0.14    0.10 
   8  -4  -2   -0.07    0.05 
  -8   4   2    0.14    0.06 
  -8   4   2    0.05    0.06 
   7  -4  -2   41.21    1.48 
   7  -4  -2   40.94    1.46 
   7  -4  -2   41.62    1.52 
  -7   4   2   41.06    1.47 
  -7   4   2   42.29    1.49 
  -7   4   2   42.30    1.49 
   6  -4  -2   43.64    1.58 
   6  -4  -2   43.69    1.55 
   6  -4  -2   43.38    1.61 
  -6   4   2   45.04    1.57 
  -6   4   2   43.56    1.58 
  -6   4   2   46.19    1.58 
  -6   4   2   45.74    1.58 
   5  -4  -2    4.45    0.21 
   5  -4  -2    4.52    0.19 
  -5   4   2    4.61    0.22 
  -5   4   2    4.80    0.21 
  -5   4   2    4.66    0.22 
   4  -4  -2   43.57    1.53 
   4  -4  -2   43.08    1.50 
   4  -4  -2   41.64    1.48 
  -4   4   2   41.31    1.50 
  -4   4   2   42.01    1.50 
  -4   4   2   41.30    1.50 
  -4   4   2   40.95    1.49 
  -4   4   2   42.78    1.49 
  -4   4   2   46.24    1.53 
  -4   4   2   41.68    1.50 
   3  -4  -2  170.54    5.57 
   3  -4  -2  159.51    5.55 
   3  -4  -2  170.94    5.58 
   3  -4  -2  157.58    5.54 
  -3   4   2  155.32    5.55 
  -3   4   2  163.84    5.55 
  -3   4   2  165.44    5.57 
  -3   4   2  155.37    5.55 
  -3   4   2  147.75    5.54 
  -3   4   2  160.51    5.54 
   2  -4  -2   78.02    2.80 
   2  -4  -2   77.29    2.79 
   2  -4  -2   82.63    2.82 
  -2   4   2   80.79    2.80 
  -2   4   2   81.63    2.80 
  -2   4   2   82.15    2.81 
  -2   4   2   78.59    2.79 
  -2   4   2   81.71    2.80 
   1  -4  -2   63.41    2.35 
   1  -4  -2   58.68    2.34 
   1  -4  -2   67.37    2.34 
  -1   4   2   70.80    2.35 
  -1   4   2   60.94    2.35 
  -1   4   2   71.88    2.34 
  -1   4   2   65.96    2.33 
  -1   4   2   69.13    2.35 
  -1   4   2   74.79    2.35 
   0  -4  -2    3.03    0.18 
   0  -4  -2    2.79    0.15 
   0  -4  -2    2.70    0.17 
   0   4   2    2.97    0.17 
   0   4   2    3.01    0.17 
   0   4   2    2.83    0.15 
   0   4   2    3.09    0.18 
   0   4   2    3.11    0.15 
   0   4   2    2.65    0.15 
  -1  -4  -2   44.23    1.54 
  -1  -4  -2   44.93    1.58 
  -1  -4  -2   43.64    1.53 
  -1  -4  -2   42.28    1.53 
  -1  -4  -2   43.12    1.53 
   1   4   2   42.43    1.52 
   1   4   2   40.17    1.55 
   1   4   2   39.37    1.51 
   1   4   2   45.81    1.54 
   1   4   2   44.32    1.53 
  -2  -4  -2    4.72    0.22 
  -2  -4  -2    4.55    0.22 
  -2  -4  -2    4.32    0.23 
  -2  -4  -2    4.48    0.22 
   2   4   2    4.13    0.20 
   2   4   2    4.30    0.24 
   2   4   2    4.62    0.22 
   2   4   2    4.69    0.23 
   2   4   2    4.53    0.21 
  -3  -4  -2    0.32    0.07 
  -3  -4  -2    0.09    0.07 
  -3  -4  -2    0.20    0.06 
   3   4   2    0.08    0.05 
   3   4   2    0.20    0.05 
   3   4   2    0.15    0.07 
   3   4   2    0.10    0.05 
   3   4   2    0.11    0.08 
  -4  -4  -2   13.54    0.59 
  -4  -4  -2   14.93    0.60 
  -4  -4  -2   15.98    0.62 
   4   4   2   15.58    0.59 
   4   4   2   15.67    0.59 
   4   4   2   15.35    0.63 
   4   4   2   14.64    0.57 
   4   4   2   14.85    0.56 
   4   4   2   15.24    0.60 
  -5  -4  -2   10.36    0.44 
  -5  -4  -2    9.91    0.44 
   5   4   2   10.37    0.41 
   5   4   2   10.51    0.45 
   5   4   2   10.09    0.48 
   5   4   2   10.56    0.40 
   5   4   2   10.12    0.44 
   5   4   2    9.97    0.43 
  -6  -4  -2   29.98    1.10 
   6   4   2   28.61    1.09 
   6   4   2   30.01    1.05 
   6   4   2   28.64    1.10 
   6   4   2   27.73    1.04 
   6   4   2   29.62    1.14 
  -7  -4  -2    2.02    0.20 
   7   4   2    2.34    0.14 
   7   4   2    2.16    0.23 
   7   4   2    2.22    0.21 
   7   4   2    2.10    0.14 
   7   4   2    2.30    0.23 
  -8  -4  -2   10.61    0.49 
   8   4   2   10.63    0.53 
   8   4   2   10.08    0.48 
   8   4   2   10.11    0.40 
   8   4   2   10.82    0.50 
  -9  -4  -2    5.98    0.35 
   9   4   2    6.37    0.40 
   9   4   2    5.97    0.37 
   9   4   2    5.93    0.36 
 -10  -4  -2   11.44    0.54 
  10   4   2   10.92    0.54 
  10   4   2   11.28    0.59 
  10   4   2   11.26    0.56 
 -11  -4  -2    4.37    0.33 
  11   4   2    4.86    0.35 
  11   4   2    4.45    0.37 
  15  -5  -2   13.44    0.66 
 -15   5   2   14.10    0.63 
  14  -5  -2    5.43    0.38 
 -14   5   2    5.50    0.34 
  13  -5  -2    0.20    0.05 
 -13   5   2    0.15    0.10 
  12  -5  -2    0.11    0.06 
  12  -5  -2    0.31    0.15 
 -12   5   2    0.24    0.10 
  11  -5  -2    2.02    0.15 
  11  -5  -2    1.70    0.14 
  11  -5  -2    1.93    0.26 
 -11   5   2    1.79    0.19 
  10  -5  -2   20.23    0.79 
  10  -5  -2   20.82    0.76 
  10  -5  -2   20.13    0.85 
  10  -5  -2   21.73    0.81 
 -10   5   2   20.60    0.80 
 -10   5   2   20.01    0.80 
   9  -5  -2   47.18    1.66 
   9  -5  -2   45.63    1.63 
   9  -5  -2   45.62    1.62 
   9  -5  -2   47.44    1.71 
  -9   5   2   46.87    1.66 
  -9   5   2   44.95    1.66 
  -9   5   2   45.66    1.65 
   8  -5  -2   45.30    1.63 
   8  -5  -2   44.96    1.71 
   8  -5  -2   46.44    1.66 
  -8   5   2   48.83    1.67 
  -8   5   2   47.38    1.67 
  -8   5   2   46.44    1.65 
   7  -5  -2   30.52    1.14 
   7  -5  -2   30.32    1.18 
   7  -5  -2   30.94    1.11 
  -7   5   2   32.35    1.15 
  -7   5   2   31.91    1.13 
  -7   5   2   32.37    1.14 
   6  -5  -2  149.88    5.09 
   6  -5  -2  147.49    5.15 
   6  -5  -2  150.11    5.11 
  -6   5   2  132.47    5.11 
  -6   5   2  147.64    5.12 
  -6   5   2  151.55    5.10 
  -6   5   2  153.28    5.12 
   5  -5  -2   13.91    0.52 
   5  -5  -2   14.20    0.56 
   5  -5  -2   13.42    0.50 
  -5   5   2   13.22    0.53 
  -5   5   2   13.70    0.51 
  -5   5   2   13.53    0.50 
  -5   5   2   13.66    0.53 
   4  -5  -2   49.01    1.71 
   4  -5  -2   49.59    1.73 
   4  -5  -2   43.47    1.75 
  -4   5   2   46.57    1.73 
  -4   5   2   49.02    1.72 
  -4   5   2   52.93    1.72 
  -4   5   2   51.51    1.73 
   3  -5  -2    1.47    0.11 
   3  -5  -2    1.46    0.14 
   3  -5  -2    1.51    0.12 
  -3   5   2    1.53    0.12 
  -3   5   2    1.57    0.13 
  -3   5   2    1.58    0.12 
  -3   5   2    1.74    0.13 
  -3   5   2    1.48    0.11 
   2  -5  -2    2.66    0.17 
   2  -5  -2    2.14    0.15 
   2  -5  -2    2.69    0.15 
  -2   5   2    2.40    0.16 
  -2   5   2    2.52    0.14 
  -2   5   2    2.89    0.16 
  -2   5   2    2.83    0.16 
  -2   5   2    2.57    0.15 
   1  -5  -2   28.54    1.14 
   1  -5  -2   32.43    1.13 
   1  -5  -2   29.70    1.14 
  -1   5   2   29.66    1.13 
  -1   5   2   31.91    1.14 
  -1   5   2   31.57    1.14 
  -1   5   2   34.82    1.15 
  -1   5   2   31.48    1.12 
  -1   5   2   32.34    1.13 
   0  -5  -2   66.72    2.54 
   0  -5  -2   74.72    2.54 
   0   5   2   70.06    2.54 
   0   5   2   74.71    2.54 
   0   5   2   73.24    2.53 
   0   5   2   70.11    2.52 
   0   5   2   75.89    2.55 
  -1  -5  -2    1.17    0.13 
  -1  -5  -2    1.03    0.11 
   1   5   2    1.35    0.11 
   1   5   2    1.47    0.12 
   1   5   2    1.25    0.14 
   1   5   2    1.24    0.13 
   1   5   2    1.39    0.11 
  -2  -5  -2    3.60    0.21 
  -2  -5  -2    4.47    0.23 
   2   5   2    4.04    0.25 
   2   5   2    3.93    0.21 
   2   5   2    4.08    0.21 
   2   5   2    4.18    0.23 
   2   5   2    4.13    0.20 
  -3  -5  -2    0.08    0.05 
  -3  -5  -2    0.13    0.08 
  -3  -5  -2    0.07    0.06 
   3   5   2    0.08    0.05 
   3   5   2    0.05    0.05 
   3   5   2    0.18    0.09 
   3   5   2    0.18    0.07 
   3   5   2   -0.03    0.07 
  -4  -5  -2    5.42    0.28 
  -4  -5  -2    5.35    0.29 
  -4  -5  -2    4.94    0.28 
   4   5   2    5.58    0.27 
   4   5   2    5.14    0.29 
   4   5   2    5.82    0.25 
   4   5   2    5.38    0.32 
   4   5   2    5.21    0.26 
  -5  -5  -2    0.72    0.13 
  -5  -5  -2    0.72    0.11 
  -5  -5  -2    0.92    0.14 
   5   5   2    0.69    0.11 
   5   5   2    0.78    0.11 
   5   5   2    0.62    0.13 
   5   5   2    0.79    0.16 
   5   5   2    0.55    0.12 
  -6  -5  -2   25.82    1.05 
  -6  -5  -2   28.42    1.07 
   6   5   2   28.96    1.10 
   6   5   2   28.11    1.01 
   6   5   2   26.98    1.00 
   6   5   2   26.78    1.06 
  -7  -5  -2   65.06    2.38 
  -7  -5  -2   65.79    2.40 
   7   5   2   65.78    2.31 
   7   5   2   64.38    2.36 
   7   5   2   68.55    2.39 
   7   5   2   66.61    2.43 
   7   5   2   65.17    2.31 
  -8  -5  -2    9.44    0.46 
   8   5   2    9.11    0.45 
   8   5   2    9.20    0.50 
   8   5   2    9.04    0.36 
   8   5   2    9.26    0.48 
  -9  -5  -2   11.24    0.54 
   9   5   2   11.70    0.54 
   9   5   2   11.80    0.60 
   9   5   2   10.91    0.56 
  10   5   2    3.72    0.39 
  10   5   2    3.39    0.34 
 -16   6   2    4.50    0.39 
  15  -6  -2    3.06    0.32 
 -15   6   2    3.62    0.29 
 -14   6   2    0.37    0.12 
  13  -6  -2    7.74    0.47 
 -13   6   2    7.51    0.40 
  12  -6  -2   46.43    1.77 
  12  -6  -2   45.24    1.63 
 -12   6   2   47.60    1.70 
  11  -6  -2   77.80    2.82 
  11  -6  -2   78.17    2.70 
 -11   6   2   76.52    2.76 
  10  -6  -2    0.83    0.11 
  10  -6  -2    0.72    0.16 
 -10   6   2    0.59    0.11 
 -10   6   2    0.71    0.10 
   9  -6  -2    0.12    0.08 
   9  -6  -2   -0.07    0.11 
   9  -6  -2    0.21    0.04 
  -9   6   2    0.24    0.08 
  -9   6   2    0.32    0.08 
  -9   6   2    0.14    0.07 
   8  -6  -2    6.80    0.37 
   8  -6  -2    6.47    0.31 
   8  -6  -2    6.66    0.26 
  -8   6   2    6.98    0.31 
  -8   6   2    6.92    0.32 
  -8   6   2    7.17    0.32 
   7  -6  -2    5.51    0.22 
   7  -6  -2    5.79    0.32 
   7  -6  -2    5.50    0.26 
  -7   6   2    5.79    0.27 
  -7   6   2    5.31    0.25 
  -7   6   2    5.60    0.27 
   6  -6  -2    5.56    0.29 
   6  -6  -2    5.04    0.21 
   6  -6  -2    5.12    0.25 
  -6   6   2    4.31    0.24 
  -6   6   2    5.07    0.25 
  -6   6   2    4.94    0.23 
  -6   6   2    5.18    0.25 
   5  -6  -2   69.02    2.32 
   5  -6  -2   64.35    2.28 
   5  -6  -2   62.34    2.26 
  -5   6   2   64.44    2.27 
  -5   6   2   63.94    2.26 
  -5   6   2   64.58    2.29 
  -5   6   2   65.08    2.29 
   4  -6  -2    0.87    0.10 
   4  -6  -2    1.03    0.11 
   4  -6  -2    1.07    0.14 
  -4   6   2    1.07    0.11 
  -4   6   2    0.90    0.11 
  -4   6   2    1.10    0.10 
  -4   6   2    1.12    0.10 
   3  -6  -2   36.19    1.27 
   3  -6  -2   32.96    1.24 
   3  -6  -2   34.63    1.25 
  -3   6   2   34.74    1.24 
  -3   6   2   34.91    1.25 
  -3   6   2   34.20    1.24 
  -3   6   2   34.49    1.25 
   2  -6  -2   16.34    0.64 
   2  -6  -2   16.07    0.63 
   2  -6  -2   15.67    0.62 
  -2   6   2   16.13    0.63 
  -2   6   2   17.53    0.62 
  -2   6   2   16.21    0.63 
  -2   6   2   16.68    0.63 
   1  -6  -2   62.71    2.24 
   1  -6  -2   68.33    2.26 
  -1   6   2   65.72    2.25 
  -1   6   2   64.59    2.23 
  -1   6   2   59.46    2.24 
  -1   6   2   63.85    2.26 
  -1   6   2   60.50    2.25 
   0  -6  -2    2.85    0.18 
   0  -6  -2    3.12    0.19 
   0   6   2    2.62    0.19 
   0   6   2    2.69    0.17 
   0   6   2    2.56    0.17 
   0   6   2    2.75    0.20 
   0   6   2    3.04    0.17 
  -1  -6  -2   12.47    0.50 
  -1  -6  -2   12.24    0.50 
   1   6   2   11.22    0.50 
   1   6   2   12.83    0.49 
   1   6   2   11.91    0.49 
   1   6   2   12.10    0.47 
   1   6   2   11.40    0.51 
  -2  -6  -2   27.21    0.97 
  -2  -6  -2   25.30    0.96 
   2   6   2   25.44    0.97 
   2   6   2   26.67    1.00 
   2   6   2   25.58    0.95 
   2   6   2   22.96    0.93 
   2   6   2   26.25    0.96 
  -3  -6  -2    0.12    0.08 
  -3  -6  -2    0.13    0.09 
   3   6   2    0.28    0.07 
   3   6   2   -0.05    0.08 
   3   6   2    0.07    0.07 
   3   6   2    0.10    0.06 
   3   6   2    0.00    0.10 
  -4  -6  -2   15.51    0.73 
  -4  -6  -2   19.27    0.76 
  -4  -6  -2   19.23    0.75 
   4   6   2   20.51    0.80 
   4   6   2   19.00    0.74 
   4   6   2   19.15    0.72 
   4   6   2   19.90    0.77 
   4   6   2   18.72    0.71 
  -5  -6  -2   20.94    0.83 
   5   6   2   20.89    0.77 
   5   6   2   20.97    0.78 
   5   6   2   19.64    0.85 
   5   6   2   19.71    0.83 
  -6  -6  -2    0.96    0.16 
  -6  -6  -2    0.65    0.11 
   6   6   2    1.00    0.16 
   6   6   2    1.03    0.17 
   6   6   2    1.22    0.14 
  -7  -6  -2   25.52    0.99 
   7   6   2   23.65    1.01 
   7   6   2   24.99    0.99 
   7   6   2   23.15    0.89 
  -8  -6  -2    4.29    0.46 
  -8  -6  -2    5.51    0.37 
   8   6   2    4.81    0.38 
   8   6   2    6.06    0.40 
   8   6   2    5.55    0.25 
   9   6   2    0.32    0.16 
  15  -7  -2    1.45    0.23 
 -15   7   2    1.38    0.19 
  14  -7  -2    7.83    0.49 
 -14   7   2    7.40    0.41 
  13  -7  -2   16.97    0.79 
 -13   7   2   16.74    0.71 
  12  -7  -2    5.69    0.40 
  12  -7  -2    5.64    0.23 
 -12   7   2    5.36    0.32 
  11  -7  -2    1.28    0.12 
  11  -7  -2    1.57    0.26 
 -11   7   2    1.23    0.19 
 -11   7   2    1.24    0.17 
  10  -7  -2    1.11    0.12 
  10  -7  -2    0.73    0.17 
 -10   7   2    1.06    0.16 
 -10   7   2    1.07    0.17 
   9  -7  -2    0.18    0.08 
   9  -7  -2    0.15    0.13 
  -9   7   2    0.20    0.08 
  -9   7   2    0.20    0.08 
  -9   7   2    0.15    0.08 
   8  -7  -2    3.48    0.22 
   8  -7  -2    4.03    0.29 
   8  -7  -2    3.65    0.16 
  -8   7   2    3.94    0.21 
  -8   7   2    3.69    0.22 
  -8   7   2    3.80    0.23 
  -8   7   2    3.70    0.22 
   7  -7  -2    2.04    0.16 
   7  -7  -2    1.70    0.20 
   7  -7  -2    1.77    0.11 
  -7   7   2    1.94    0.17 
  -7   7   2    1.86    0.17 
  -7   7   2    1.91    0.15 
  -7   7   2    1.85    0.15 
   6  -7  -2   35.87    1.25 
   6  -7  -2   32.92    1.20 
   6  -7  -2   33.59    1.17 
  -6   7   2   32.14    1.21 
  -6   7   2   34.34    1.17 
  -6   7   2   33.55    1.21 
  -6   7   2   27.45    1.19 
  -6   7   2   34.37    1.19 
   5  -7  -2   30.91    1.16 
   5  -7  -2   33.19    1.20 
   5  -7  -2   32.20    1.14 
  -5   7   2   31.94    1.15 
  -5   7   2   31.26    1.14 
  -5   7   2   31.84    1.17 
   4  -7  -2   28.41    1.11 
   4  -7  -2   29.94    1.09 
   4  -7  -2   29.64    1.08 
  -4   7   2   30.46    1.09 
  -4   7   2   29.49    1.09 
  -4   7   2   30.00    1.08 
   3  -7  -2    0.07    0.08 
   3  -7  -2    0.05    0.06 
  -3   7   2    0.11    0.06 
  -3   7   2    0.10    0.06 
  -3   7   2    0.05    0.07 
  -3   7   2    0.15    0.06 
   2  -7  -2   25.89    0.99 
   2  -7  -2   26.61    1.00 
  -2   7   2   25.99    1.00 
  -2   7   2   27.04    1.00 
  -2   7   2   28.27    0.98 
  -2   7   2   26.22    0.99 
  -2   7   2   26.94    1.00 
   1  -7  -2   29.11    1.11 
   1  -7  -2   31.14    1.11 
  -1   7   2   30.53    1.11 
  -1   7   2   30.69    1.12 
  -1   7   2   29.65    1.11 
  -1   7   2   28.78    1.09 
  -1   7   2   30.38    1.11 
   0  -7  -2    2.12    0.17 
   0  -7  -2    2.33    0.17 
   0   7   2    1.85    0.15 
   0   7   2    1.91    0.18 
   0   7   2    2.14    0.17 
   0   7   2    1.71    0.18 
   0   7   2    2.02    0.16 
  -1  -7  -2   19.08    0.75 
  -1  -7  -2   19.49    0.75 
   1   7   2   19.38    0.77 
   1   7   2   17.93    0.73 
   1   7   2   19.01    0.72 
   1   7   2   19.69    0.76 
   1   7   2   19.22    0.74 
  -2  -7  -2   96.35    3.31 
  -2  -7  -2   95.52    3.31 
   2   7   2   91.94    3.28 
   2   7   2   98.37    3.32 
   2   7   2   85.78    3.29 
   2   7   2   95.22    3.30 
   2   7   2   93.38    3.34 
  -3  -7  -2    2.54    0.21 
  -3  -7  -2    3.36    0.23 
   3   7   2    2.98    0.22 
   3   7   2    2.96    0.25 
   3   7   2    2.84    0.19 
   3   7   2    3.32    0.20 
   3   7   2    3.02    0.24 
  -4  -7  -2    9.18    0.43 
  -4  -7  -2    9.17    0.43 
   4   7   2    9.07    0.47 
   4   7   2    9.09    0.44 
   4   7   2    8.33    0.38 
  -5  -7  -2    3.51    0.26 
  -5  -7  -2    3.91    0.27 
   5   7   2    3.55    0.30 
   5   7   2    3.80    0.29 
   5   7   2    3.66    0.22 
  -6  -7  -2    3.16    0.27 
  -6  -7  -2    2.76    0.25 
   6   7   2    3.17    0.29 
   6   7   2    3.18    0.30 
   6   7   2    3.05    0.20 
   7   7   2   31.05    1.22 
   7   7   2   29.39    1.18 
   7   7   2   28.61    1.08 
   8   7   2   20.50    0.88 
   8   7   2   20.08    0.75 
 -15   8   2    0.24    0.13 
  14  -8  -2    1.94    0.31 
 -14   8   2    1.63    0.23 
  13  -8  -2    3.60    0.34 
 -13   8   2    3.18    0.27 
  12  -8  -2   14.84    0.72 
 -12   8   2   15.19    0.65 
 -12   8   2   15.96    0.64 
  11  -8  -2    4.39    0.35 
  11  -8  -2    4.05    0.19 
 -11   8   2    4.22    0.26 
 -11   8   2    3.97    0.27 
  10  -8  -2   53.75    1.98 
 -10   8   2   52.04    1.89 
 -10   8   2   52.63    1.91 
   9  -8  -2   29.72    1.18 
  -9   8   2   30.18    1.10 
  -9   8   2   29.43    1.12 
   8  -8  -2    0.27    0.08 
   8  -8  -2    0.31    0.13 
  -8   8   2    0.17    0.09 
  -8   8   2    0.36    0.09 
  -8   8   2    0.23    0.09 
  -8   8   2    0.36    0.08 
   7  -8  -2   50.94    1.86 
   7  -8  -2   47.83    1.82 
   7  -8  -2   55.69    1.91 
  -7   8   2   49.81    1.87 
  -7   8   2   51.23    1.82 
  -7   8   2   52.90    1.87 
  -7   8   2   54.49    1.85 
  -7   8   2   53.27    1.87 
   6  -8  -2    0.11    0.05 
   6  -8  -2    0.56    0.12 
   6  -8  -2    0.08    0.07 
  -6   8   2    0.06    0.07 
  -6   8   2    0.12    0.07 
  -6   8   2    0.04    0.07 
  -6   8   2    0.07    0.06 
  -6   8   2    0.15    0.05 
   5  -8  -2   17.51    0.67 
   5  -8  -2   16.89    0.70 
   5  -8  -2   16.98    0.65 
  -5   8   2   16.52    0.65 
  -5   8   2   17.33    0.68 
  -5   8   2   17.48    0.65 
   4  -8  -2    3.13    0.19 
   4  -8  -2    3.37    0.23 
   4  -8  -2    2.88    0.20 
  -4   8   2    3.04    0.19 
  -4   8   2    2.87    0.21 
  -4   8   2    2.80    0.19 
  -4   8   2    3.30    0.21 
   3  -8  -2   12.61    0.54 
   3  -8  -2   13.54    0.56 
  -3   8   2   13.03    0.54 
  -3   8   2   13.02    0.55 
  -3   8   2   13.10    0.54 
  -3   8   2   14.11    0.53 
   2  -8  -2    1.42    0.16 
   2  -8  -2    1.24    0.15 
  -2   8   2    1.50    0.15 
  -2   8   2    1.54    0.16 
  -2   8   2    1.55    0.17 
  -2   8   2    1.47    0.16 
  -2   8   2    1.58    0.15 
   1  -8  -2   20.90    0.83 
   1  -8  -2   21.92    0.84 
  -1   8   2   20.97    0.84 
  -1   8   2   21.91    0.83 
  -1   8   2   23.59    0.82 
  -1   8   2   21.61    0.83 
  -1   8   2   19.94    0.84 
   0  -8  -2   11.09    0.46 
   0  -8  -2    9.38    0.45 
   0   8   2   11.53    0.46 
   0   8   2   10.08    0.45 
   0   8   2   10.20    0.44 
   0   8   2   10.19    0.48 
   0   8   2   10.91    0.47 
  -1  -8  -2    0.17    0.09 
  -1  -8  -2    0.07    0.08 
   1   8   2    0.10    0.10 
   1   8   2   -0.07    0.09 
   1   8   2    0.01    0.07 
   1   8   2    0.03    0.07 
   1   8   2    0.11    0.08 
  -2  -8  -2    1.77    0.19 
  -2  -8  -2    1.87    0.18 
   2   8   2    2.02    0.22 
   2   8   2    1.63    0.18 
   2   8   2    1.54    0.23 
   2   8   2    1.58    0.17 
  -3  -8  -2    0.47    0.11 
  -3  -8  -2    0.39    0.11 
   3   8   2    0.37    0.12 
   3   8   2    0.44    0.12 
   3   8   2    0.24    0.08 
  -4  -8  -2    1.06    0.18 
  -4  -8  -2    1.12    0.15 
   4   8   2    1.03    0.16 
   4   8   2    1.48    0.23 
   4   8   2    1.00    0.15 
  -5  -8  -2    0.18    0.12 
   5   8   2    0.10    0.13 
   5   8   2    0.04    0.08 
   5   8   2    0.00    0.12 
   6   8   2    7.91    0.47 
   6   8   2    7.89    0.35 
   6   8   2    7.35    0.45 
   7   8   2    3.10    0.34 
   7   8   2    3.61    0.22 
 -15   9   2    5.13    0.36 
  14  -9  -2    0.26    0.18 
 -14   9   2    0.18    0.11 
  13  -9  -2   20.87    0.95 
 -13   9   2   21.15    0.86 
  12  -9  -2   21.64    0.94 
 -12   9   2   20.95    0.86 
 -12   9   2   21.72    0.85 
  11  -9  -2    6.49    0.42 
  11  -9  -2    6.14    0.26 
 -11   9   2    6.48    0.33 
 -11   9   2    6.09    0.35 
  10  -9  -2    2.19    0.27 
 -10   9   2    2.11    0.22 
 -10   9   2    2.09    0.19 
   9  -9  -2    0.75    0.17 
  -9   9   2    1.13    0.16 
  -9   9   2    0.69    0.12 
   8  -9  -2    2.24    0.26 
  -8   9   2    1.91    0.18 
  -8   9   2    2.00    0.20 
   7  -9  -2    1.45    0.20 
  -7   9   2    1.26    0.18 
  -7   9   2    1.74    0.17 
  -7   9   2    1.46    0.11 
  -7   9   2    1.43    0.17 
  -7   9   2    1.58    0.16 
   6  -9  -2   23.16    0.88 
   6  -9  -2   21.14    0.83 
  -6   9   2   21.06    0.80 
  -6   9   2   20.64    0.84 
  -6   9   2   22.72    0.83 
   5  -9  -2   24.11    0.91 
   5  -9  -2   23.57    0.90 
   5  -9  -2   25.62    0.95 
  -5   9   2   22.21    0.91 
  -5   9   2   24.30    0.92 
  -5   9   2   24.41    0.90 
  -5   9   2   24.06    0.90 
   4  -9  -2    0.45    0.09 
   4  -9  -2    0.72    0.13 
  -4   9   2    0.65    0.11 
  -4   9   2    0.62    0.11 
  -4   9   2    0.47    0.09 
  -4   9   2    0.72    0.10 
   3  -9  -2   10.09    0.45 
   3  -9  -2    9.74    0.46 
  -3   9   2   10.55    0.47 
  -3   9   2   10.25    0.46 
  -3   9   2   10.72    0.46 
  -3   9   2   10.57    0.44 
  -3   9   2   10.18    0.45 
   2  -9  -2   47.01    1.73 
   2  -9  -2   52.93    1.75 
  -2   9   2   47.95    1.74 
  -2   9   2   48.98    1.74 
  -2   9   2   45.52    1.74 
  -2   9   2   47.34    1.72 
  -2   9   2   44.78    1.74 
   1  -9  -2    3.46    0.24 
   1  -9  -2    3.69    0.24 
  -1   9   2    3.17    0.25 
  -1   9   2    3.33    0.24 
  -1   9   2    4.27    0.26 
  -1   9   2    3.75    0.23 
  -1   9   2    3.49    0.22 
   0  -9  -2    0.05    0.09 
   0  -9  -2   -0.07    0.07 
   0   9   2   -0.08    0.07 
   0   9   2   -0.01    0.10 
   0   9   2    0.08    0.10 
   0   9   2    0.15    0.09 
  -1  -9  -2   28.22    1.04 
  -1  -9  -2   26.48    1.03 
   1   9   2   27.13    1.08 
   1   9   2   28.85    1.06 
   1   9   2   27.11    1.04 
   1   9   2   24.40    1.00 
  -2  -9  -2    5.81    0.33 
  -2  -9  -2    5.75    0.32 
   2   9   2    6.42    0.35 
   2   9   2    5.37    0.30 
   2   9   2    5.83    0.37 
   3   9   2   17.70    0.79 
   3   9   2   19.41    0.71 
   3   9   2   16.50    0.75 
   4   9   2   29.30    1.09 
   4   9   2   29.74    1.16 
   4   9   2   29.01    1.19 
   5   9   2    8.51    0.65 
   5   9   2    8.92    0.54 
   5   9   2    8.03    0.38 
   6   9   2    3.90    0.24 
 -15  10   2    1.34    0.19 
  14 -10  -2    0.56    0.20 
 -14  10   2    0.33    0.14 
  13 -10  -2    2.75    0.33 
 -13  10   2    1.98    0.25 
 -13  10   2    2.50    0.25 
  12 -10  -2    5.97    0.42 
 -12  10   2    5.48    0.33 
 -12  10   2    5.71    0.35 
  11 -10  -2   13.81    0.67 
 -11  10   2   13.06    0.60 
 -11  10   2   13.76    0.58 
  10 -10  -2    1.48    0.27 
 -10  10   2    1.78    0.20 
 -10  10   2    1.72    0.22 
   9 -10  -2   13.03    0.63 
  -9  10   2   13.04    0.57 
  -9  10   2   13.28    0.56 
   8 -10  -2   28.93    1.15 
  -8  10   2   28.77    1.09 
  -8  10   2   29.24    1.11 
   7 -10  -2    0.34    0.13 
  -7  10   2    0.11    0.08 
  -7  10   2    0.02    0.08 
   6 -10  -2    1.26    0.20 
  -6  10   2    1.49    0.17 
  -6  10   2    1.76    0.15 
   5 -10  -2    2.58    0.23 
  -5  10   2    2.97    0.20 
  -5  10   2    2.49    0.19 
  -5  10   2    2.48    0.22 
  -5  10   2    2.84    0.23 
   4 -10  -2    0.50    0.13 
  -4  10   2    0.19    0.09 
  -4  10   2    0.15    0.10 
  -4  10   2    0.27    0.09 
  -4  10   2    0.29    0.11 
   3 -10  -2   28.93    1.18 
  -3  10   2   30.60    1.18 
  -3  10   2   32.61    1.17 
  -3  10   2   31.22    1.19 
  -3  10   2   33.42    1.23 
  -3  10   2   31.63    1.19 
   2 -10  -2   30.27    1.22 
  -2  10   2   32.40    1.22 
  -2  10   2   32.45    1.23 
  -2  10   2   33.78    1.20 
  -2  10   2   32.97    1.23 
   1 -10  -2    0.35    0.12 
  -1  10   2   -0.01    0.09 
  -1  10   2    0.14    0.11 
  -1  10   2    0.21    0.10 
  -1  10   2    0.27    0.11 
   0 -10  -2    0.65    0.13 
   0  10   2    0.63    0.14 
   0  10   2    0.88    0.15 
   0  10   2    0.99    0.16 
   1  10   2    5.22    0.35 
   1  10   2    6.35    0.31 
   1  10   2    5.66    0.36 
   2  10   2   29.33    1.08 
   2  10   2   28.00    1.15 
   3  10   2    0.03    0.13 
   3  10   2    0.13    0.09 
   4  10   2   10.22    0.46 
   5  10   2    1.75    0.20 
 -14  11   2    7.20    0.41 
 -14  11   2    7.55    0.44 
  13 -11  -2    0.51    0.20 
 -13  11   2    0.56    0.15 
 -13  11   2    0.55    0.14 
  12 -11  -2    0.18    0.17 
 -12  11   2    0.11    0.12 
 -12  11   2    0.23    0.11 
  11 -11  -2   10.99    0.60 
 -11  11   2   11.66    0.52 
 -11  11   2   11.34    0.54 
  10 -11  -2   25.01    1.03 
 -10  11   2   23.42    0.95 
 -10  11   2   25.02    0.97 
   9 -11  -2    2.84    0.31 
  -9  11   2    2.90    0.26 
  -9  11   2    2.60    0.23 
   8 -11  -2    0.36    0.15 
  -8  11   2    0.21    0.11 
  -8  11   2    0.32    0.10 
   7 -11  -2    0.40    0.14 
  -7  11   2    0.42    0.10 
   6 -11  -2    7.44    0.40 
  -6  11   2    7.32    0.35 
  -6  11   2    5.94    0.35 
   5 -11  -2    3.04    0.27 
  -5  11   2    3.26    0.25 
  -5  11   2    2.99    0.22 
  -5  11   2    3.16    0.23 
   4 -11  -2   21.30    0.87 
  -4  11   2   21.96    0.86 
  -4  11   2   22.06    0.85 
  -4  11   2   21.41    0.87 
   3 -11  -2    6.79    0.36 
  -3  11   2    6.64    0.34 
  -3  11   2    5.92    0.35 
  -3  11   2    6.02    0.35 
   2 -11  -2    5.73    0.33 
  -2  11   2    5.83    0.35 
  -2  11   2    5.62    0.34 
  -2  11   2    5.85    0.32 
  -1  11   2    0.07    0.09 
  -1  11   2    0.02    0.11 
   0  11   2    4.37    0.32 
   0  11   2    3.84    0.26 
   1  11   2    6.02    0.33 
   1  11   2    6.61    0.41 
   2  11   2    0.98    0.19 
   2  11   2    0.51    0.12 
   3  11   2    4.84    0.29 
   4  11   2    0.12    0.10 
  13 -12  -2    0.48    0.20 
 -13  12   2    0.39    0.13 
 -13  12   2    0.57    0.16 
  12 -12  -2    9.71    0.57 
 -12  12   2    9.83    0.47 
 -12  12   2    8.88    0.49 
  11 -12  -2    4.19    0.38 
 -11  12   2    3.63    0.31 
 -11  12   2    3.44    0.28 
  10 -12  -2    5.62    0.41 
 -10  12   2    5.60    0.33 
 -10  12   2    5.38    0.36 
   9 -12  -2    4.64    0.37 
  -9  12   2    4.38    0.30 
  -9  12   2    4.54    0.32 
   8 -12  -2    3.31    0.31 
  -8  12   2    2.02    0.22 
  -8  12   2    2.87    0.24 
   7 -12  -2   15.28    0.69 
  -7  12   2   15.30    0.64 
   6 -12  -2    1.69    0.25 
  -6  12   2    1.92    0.23 
  -6  12   2    1.87    0.21 
   5 -12  -2    0.48    0.14 
  -5  12   2    0.27    0.12 
  -5  12   2    0.37    0.11 
   4 -12  -2    0.09    0.12 
  -4  12   2    0.12    0.10 
  -4  12   2    0.04    0.10 
  -4  12   2    0.08    0.11 
  -3  12   2    4.22    0.28 
  -3  12   2    4.45    0.30 
  -2  12   2    0.24    0.11 
  -2  12   2    0.22    0.12 
  -1  12   2    9.42    0.45 
  -1  12   2    9.66    0.50 
   0  12   2   28.31    1.13 
   0  12   2   27.17    1.06 
   1  12   2    0.08    0.10 
   1  12   2    0.03    0.13 
   2  12   2    1.55    0.21 
  12 -13  -2   13.68    0.72 
 -12  13   2   12.95    0.64 
 -12  13   2   13.76    0.61 
  11 -13  -2    0.39    0.18 
 -11  13   2    0.36    0.13 
 -11  13   2    0.36    0.14 
  10 -13  -2    7.61    0.47 
 -10  13   2    7.04    0.42 
 -10  13   2    6.76    0.39 
   9 -13  -2    0.15    0.16 
  -9  13   2    0.07    0.11 
  -9  13   2    0.09    0.18 
   8 -13  -2    1.36    0.26 
  -8  13   2    1.30    0.21 
   7 -13  -2    4.05    0.33 
  -7  13   2    4.21    0.31 
  -7  13   2    4.27    0.29 
  -6  13   2    4.36    0.30 
  -5  13   2    0.06    0.10 
  -4  13   2    1.51    0.21 
  -3  13   2    7.13    0.38 
  -2  13   2    2.70    0.25 
  -2  13   2    2.39    0.27 
  -1  13   2    1.04    0.15 
  -1  13   2    1.01    0.18 
   0  13   2    0.29    0.12 
  10 -14  -2    0.35    0.21 
 -10  14   2    0.27    0.13 
  -9  14   2    1.00    0.17 
  -8  14   2    8.44    0.44 
  -7  14   2    0.29    0.12 
  -6  14   2   -0.04    0.11 
  -5  14   2    1.84    0.24 
  -4  14   2    0.22    0.12 
  -3  14   2    1.35    0.18 
  -4  16  -3    0.99    0.17 
  -4  16  -3    1.05    0.19 
  -5  16  -3    0.15    0.13 
  -5  16  -3    0.35    0.15 
  -6  16  -3    2.34    0.29 
  -7  16  -3    0.08    0.14 
  -8  16  -3    1.65    0.28 
   0  15  -3    0.28    0.17 
   0  15  -3    0.23    0.13 
   0  15  -3    0.26    0.17 
  -1  15  -3    0.63    0.16 
  -1  15  -3    0.71    0.15 
  -2  15  -3    0.50    0.16 
  -2  15  -3    0.76    0.15 
  -3  15  -3    0.66    0.14 
  -3  15  -3    0.58    0.15 
  -4  15  -3    0.04    0.13 
  -4  15  -3    0.15    0.12 
  -5  15  -3    3.52    0.28 
  -5  15  -3    3.61    0.31 
  -6  15  -3    0.03    0.12 
  -7  15  -3    8.18    0.45 
  -8  15  -3    3.94    0.33 
  -9  15  -3    6.66    0.40 
 -10  15  -3    1.20    0.18 
 -11  15  -3    1.09    0.18 
   2  14  -3    3.93    0.31 
   1  14  -3    4.10    0.33 
   1  14  -3    3.95    0.31 
   1  14  -3    3.76    0.34 
   0  14  -3    3.48    0.28 
   0  14  -3    3.50    0.31 
   0  14  -3    3.27    0.30 
  -1  14  -3    0.23    0.13 
  -1  14  -3    0.44    0.14 
  -1  14  -3    0.31    0.12 
  -2  14  -3   18.27    0.80 
  -2  14  -3   19.23    0.79 
  -2  14  -3   17.76    0.75 
  -3  14  -3   27.74    1.01 
  -3  14  -3   24.36    1.03 
  -4  14  -3   19.74    0.78 
  -4  14  -3   18.85    0.80 
  -5  14  -3    6.06    0.33 
  -5  14  -3    5.97    0.37 
  -6  14  -3    1.60    0.23 
  -7  14  -3    3.17    0.28 
  -8  14  -3    8.98    0.46 
  -9  14  -3    1.62    0.24 
 -10  14  -3    5.23    0.34 
 -11  14  -3    0.61    0.15 
  11 -14   3    1.16    0.19 
 -12  14  -3    0.96    0.17 
  12 -14   3    0.65    0.17 
   4  13  -3    6.25    0.38 
   3  13  -3    0.68    0.14 
   3  13  -3    0.71    0.23 
   2  13  -3   15.95    0.72 
   2  13  -3   15.97    0.74 
   2  13  -3   16.30    0.69 
   1  13  -3    7.10    0.38 
   1  13  -3    6.98    0.41 
   1  13  -3    6.86    0.42 
   0  13  -3    4.01    0.31 
   0  13  -3    4.21    0.28 
   0  13  -3    4.02    0.30 
  -1  13  -3    7.56    0.37 
  -1  13  -3    6.87    0.39 
  -1  13  -3    7.17    0.40 
  -2  13  -3   20.91    0.83 
  -2  13  -3   19.70    0.82 
  -2  13  -3   18.81    0.82 
  -2  13  -3   22.13    0.81 
  -3  13  -3   11.09    0.51 
  -3  13  -3   11.24    0.49 
  -3  13  -3   10.84    0.49 
  -4  13  -3    0.74    0.12 
  -4  13  -3    0.52    0.13 
  -5  13  -3    0.75    0.12 
  -5  13  -3    0.92    0.14 
  -6  13  -3    0.11    0.10 
  -6  13  -3   -0.07    0.10 
  -7  13  -3   24.77    0.98 
   7 -13   3   25.40    0.99 
  -8  13  -3    3.16    0.27 
   8 -13   3    3.73    0.26 
  -9  13  -3   -0.04    0.10 
   9 -13   3   -0.17    0.10 
 -10  13  -3    4.46    0.30 
  10 -13   3    4.42    0.32 
 -11  13  -3   11.31    0.53 
  11 -13   3   11.59    0.56 
 -12  13  -3    0.01    0.11 
  12 -13   3   -0.16    0.13 
 -13  13  -3    0.63    0.15 
  13 -13   3    0.93    0.20 
   5  12  -3   27.82    1.09 
   4  12  -3    0.11    0.15 
   4  12  -3    0.05    0.12 
   3  12  -3   11.54    0.51 
   3  12  -3   10.20    0.55 
   2  12  -3    0.44    0.12 
   2  12  -3    0.46    0.13 
   2  12  -3    0.07    0.13 
   1  12  -3   32.86    1.19 
   1  12  -3   29.83    1.23 
   1  12  -3   31.97    1.22 
   0  12  -3    7.23    0.36 
   0  12  -3    6.74    0.39 
   0  12  -3    7.22    0.37 
   0  12  -3    6.75    0.38 
  -1  12  -3    2.96    0.22 
  -1  12  -3    2.54    0.22 
  -1  12  -3    2.52    0.24 
  -1  12  -3    2.56    0.24 
  -2  12  -3    0.09    0.09 
  -2  12  -3    0.17    0.09 
  -2  12  -3    0.14    0.10 
  -3  12  -3    1.75    0.19 
  -3  12  -3    1.90    0.18 
  -3  12  -3    2.15    0.21 
  -4  12  -3    2.16    0.19 
  -4  12  -3    2.87    0.22 
  -4  12  -3    2.29    0.18 
  -5  12  -3   50.98    1.80 
  -5  12  -3   49.34    1.82 
  -6  12  -3    7.74    0.38 
  -6  12  -3    7.42    0.35 
  -7  12  -3   10.22    0.46 
  -8  12  -3    0.46    0.11 
   8 -12   3    0.57    0.13 
  -9  12  -3    5.31    0.31 
   9 -12   3    5.30    0.32 
 -10  12  -3    0.88    0.14 
  10 -12   3    0.94    0.16 
 -11  12  -3   15.69    0.65 
  11 -12   3   14.90    0.68 
 -12  12  -3    8.21    0.43 
  12 -12   3    8.66    0.48 
 -13  12  -3    0.84    0.15 
  13 -12   3    0.95    0.20 
   6  11  -3   60.83    2.21 
   5  11  -3   10.53    0.49 
   5  11  -3   10.15    0.57 
   4  11  -3   21.74    0.89 
   4  11  -3   20.63    0.93 
   4  11  -3   23.39    0.87 
   3  11  -3    0.15    0.10 
   3  11  -3    0.23    0.13 
   3  11  -3    0.13    0.11 
   2  11  -3    2.20    0.21 
   2  11  -3    1.86    0.22 
   2  11  -3    2.12    0.25 
   1  11  -3    3.65    0.26 
   1  11  -3    3.74    0.25 
   1  11  -3    3.84    0.28 
   1  11  -3    4.10    0.27 
   0  11  -3   10.54    0.47 
   0  11  -3   10.61    0.47 
   0  11  -3   10.22    0.45 
   0  11  -3   10.09    0.49 
  -1  11  -3    0.93    0.15 
  -1  11  -3    0.70    0.13 
  -1  11  -3    0.72    0.12 
  -2  11  -3    9.87    0.42 
  -2  11  -3    9.63    0.44 
  -2  11  -3   10.25    0.45 
  -3  11  -3   13.92    0.59 
  -3  11  -3   14.39    0.58 
  -3  11  -3   14.77    0.57 
   3 -11   3   14.48    0.56 
  -4  11  -3    0.29    0.09 
  -4  11  -3    0.27    0.08 
  -4  11  -3    0.24    0.08 
   4 -11   3    0.33    0.08 
  -5  11  -3    3.51    0.19 
  -5  11  -3    3.52    0.23 
  -5  11  -3    3.66    0.21 
   5 -11   3    3.62    0.23 
  -6  11  -3    2.67    0.18 
  -6  11  -3    2.67    0.21 
  -7  11  -3    8.07    0.38 
   7 -11   3    8.42    0.39 
  -8  11  -3    0.71    0.12 
   8 -11   3    1.24    0.18 
  -9  11  -3    1.48    0.18 
   9 -11   3    1.20    0.16 
 -10  11  -3    6.78    0.35 
  10 -11   3    6.94    0.38 
 -11  11  -3    0.32    0.11 
  11 -11   3    0.04    0.12 
 -12  11  -3    3.09    0.26 
  12 -11   3    3.13    0.30 
 -13  11  -3   12.54    0.56 
  13 -11   3   11.97    0.61 
 -14  11  -3    0.52    0.14 
  14 -11   3    0.51    0.23 
   8  10  -3    1.03    0.16 
   7  10  -3    0.98    0.15 
   6  10  -3    0.35    0.12 
   6  10  -3    0.12    0.14 
   5  10  -3   12.77    0.63 
   5  10  -3   14.05    0.57 
   5  10  -3   12.45    0.59 
   4  10  -3   28.77    1.06 
   4  10  -3   26.89    1.12 
   3  10  -3    0.69    0.13 
   3  10  -3    0.64    0.11 
   3  10  -3    0.64    0.12 
   3  10  -3    0.52    0.14 
   2  10  -3   29.66    1.18 
   2  10  -3   33.03    1.24 
   2  10  -3   33.26    1.21 
   2  10  -3   32.49    1.21 
   1  10  -3    3.90    0.25 
   1  10  -3    3.57    0.24 
   1  10  -3    3.93    0.23 
   1  10  -3    3.28    0.25 
   0  10  -3   12.17    0.53 
   0  10  -3   11.84    0.51 
   0  10  -3   13.88    0.55 
   0  10  -3   12.57    0.53 
  -1  10  -3   12.24    0.49 
  -1  10  -3   11.13    0.48 
  -1  10  -3   10.64    0.46 
  -2  10  -3    0.81    0.11 
  -2  10  -3    0.78    0.09 
  -2  10  -3    1.05    0.13 
  -2  10  -3    0.98    0.14 
   2 -10   3    1.00    0.09 
  -3  10  -3    0.39    0.08 
  -3  10  -3    0.30    0.06 
  -3  10  -3    0.42    0.12 
  -3  10  -3    0.33    0.08 
  -3  10  -3    0.45    0.08 
   3 -10   3    0.53    0.10 
  -4  10  -3   43.37    1.59 
  -4  10  -3   44.98    1.57 
  -4  10  -3   45.10    1.57 
  -4  10  -3   44.19    1.63 
  -4  10  -3   44.88    1.58 
   4 -10   3   42.17    1.58 
  -5  10  -3   10.99    0.44 
  -5  10  -3   10.52    0.41 
  -5  10  -3   11.07    0.45 
  -6  10  -3   70.28    2.48 
  -6  10  -3   71.03    2.50 
  -7  10  -3   35.02    1.29 
  -7  10  -3   34.48    1.27 
   7 -10   3   36.47    1.31 
  -8  10  -3   33.10    1.24 
   8 -10   3   34.82    1.27 
  -9  10  -3    1.11    0.16 
   9 -10   3    1.07    0.18 
 -10  10  -3    3.75    0.24 
  10 -10   3    3.56    0.28 
 -11  10  -3    2.70    0.22 
  11 -10   3    2.07    0.25 
 -12  10  -3    9.32    0.45 
  12 -10   3    9.45    0.50 
 -13  10  -3   32.46    1.22 
  13 -10   3   31.19    1.27 
 -14  10  -3    2.52    0.26 
  14 -10   3    2.46    0.33 
   9   9  -3    3.07    0.27 
   8   9  -3   -0.01    0.11 
   7   9  -3   30.15    1.26 
   7   9  -3   32.00    1.18 
   6   9  -3   13.17    0.60 
   6   9  -3   14.23    0.58 
   6   9  -3   13.12    0.65 
   5   9  -3   16.28    0.68 
   5   9  -3   16.73    0.71 
   5   9  -3   17.50    0.75 
   4   9  -3   11.46    0.53 
   4   9  -3   10.98    0.47 
   4   9  -3    9.93    0.48 
   3   9  -3   15.00    0.61 
   3   9  -3   14.26    0.60 
   3   9  -3   13.50    0.58 
   3   9  -3   14.94    0.64 
   2   9  -3   16.34    0.68 
   2   9  -3   17.13    0.68 
   2   9  -3   16.68    0.67 
   2   9  -3   16.94    0.66 
   2   9  -3   16.95    0.71 
   1   9  -3    5.18    0.30 
   1   9  -3    4.85    0.27 
   1   9  -3    5.62    0.28 
   1   9  -3    5.16    0.26 
   1   9  -3    5.07    0.28 
  -1  -9   3    4.85    0.25 
   0   9  -3    7.05    0.33 
   0   9  -3    7.18    0.34 
   0   9  -3    8.20    0.35 
   0   9  -3    7.75    0.35 
   0   9  -3    7.88    0.36 
   0   9  -3    7.11    0.34 
   0  -9   3    7.32    0.32 
  -1   9  -3   54.52    2.02 
  -1   9  -3   56.11    1.98 
  -1   9  -3   56.92    2.03 
  -1   9  -3   57.34    2.04 
  -1   9  -3   57.54    2.03 
  -1   9  -3   59.31    2.02 
   1  -9   3   57.43    2.03 
   1  -9   3   56.98    2.01 
  -2   9  -3    4.19    0.23 
  -2   9  -3    4.17    0.22 
  -2   9  -3    4.70    0.24 
  -2   9  -3    4.19    0.22 
  -2   9  -3    4.01    0.19 
  -2   9  -3    4.46    0.21 
   2  -9   3    4.37    0.20 
   2  -9   3    4.51    0.23 
   2  -9   3    4.07    0.19 
  -3   9  -3    2.86    0.17 
  -3   9  -3    2.64    0.17 
  -3   9  -3    2.63    0.17 
  -3   9  -3    3.00    0.16 
  -3   9  -3    2.90    0.16 
  -3   9  -3    2.50    0.17 
   3  -9   3    2.75    0.16 
   3  -9   3    2.66    0.17 
   3  -9   3    2.44    0.14 
  -4   9  -3   11.59    0.45 
  -4   9  -3   11.92    0.45 
  -4   9  -3   12.08    0.47 
  -4   9  -3   11.75    0.46 
  -4   9  -3   11.48    0.46 
  -4   9  -3   11.04    0.46 
   4  -9   3   11.76    0.47 
   4  -9   3   11.79    0.45 
   4  -9   3   11.01    0.46 
  -5   9  -3  132.42    4.54 
  -5   9  -3  129.45    4.55 
  -5   9  -3  132.30    4.55 
  -5   9  -3  129.39    4.52 
  -5   9  -3  130.82    4.55 
   5  -9   3  131.80    4.55 
  -6   9  -3    3.97    0.19 
  -6   9  -3    3.86    0.21 
  -6   9  -3    4.03    0.21 
   6  -9   3    3.30    0.23 
   6  -9   3    3.92    0.21 
  -7   9  -3    0.33    0.08 
  -7   9  -3    0.41    0.08 
  -7   9  -3    0.36    0.07 
   7  -9   3    0.32    0.08 
   7  -9   3    0.44    0.11 
  -8   9  -3    9.14    0.40 
   8  -9   3    9.27    0.43 
  -9   9  -3    5.65    0.29 
   9  -9   3    5.98    0.33 
 -10   9  -3   13.74    0.56 
  10  -9   3   13.41    0.60 
 -11   9  -3   27.67    1.06 
  11  -9   3   28.29    1.11 
 -12   9  -3    8.75    0.41 
  12  -9   3    7.93    0.45 
 -13   9  -3   24.56    0.98 
  13  -9   3   25.25    1.04 
 -14   9  -3    1.42    0.23 
  14  -9   3    1.84    0.30 
  10   8  -3    9.69    0.47 
   9   8  -3   -0.01    0.11 
   8   8  -3    5.91    0.34 
   8   8  -3    6.29    0.42 
   7   8  -3   72.67    2.52 
   7   8  -3   65.00    2.54 
   7   8  -3   69.81    2.47 
   6   8  -3   42.16    1.54 
   6   8  -3   43.24    1.61 
   6   8  -3   41.23    1.56 
   5   8  -3   -0.01    0.08 
   5   8  -3    0.09    0.10 
   5   8  -3    0.09    0.14 
   5   8  -3    0.10    0.08 
   5   8  -3    0.08    0.12 
   4   8  -3    0.65    0.11 
   4   8  -3    0.65    0.11 
   4   8  -3    0.67    0.12 
   4   8  -3    0.60    0.10 
   4   8  -3    0.53    0.13 
  -4  -8   3    0.78    0.16 
  -4  -8   3    0.55    0.08 
   3   8  -3   63.95    2.32 
   3   8  -3   63.11    2.30 
   3   8  -3   67.38    2.36 
   3   8  -3   61.81    2.32 
   3   8  -3   69.95    2.33 
  -3  -8   3   64.60    2.31 
   2   8  -3   54.75    1.93 
   2   8  -3   53.94    1.91 
   2   8  -3   54.85    1.93 
   2   8  -3   53.60    1.93 
   2   8  -3   53.72    1.95 
  -2  -8   3   51.85    1.91 
   1   8  -3    4.51    0.23 
   1   8  -3    4.29    0.26 
   1   8  -3    4.44    0.24 
   1   8  -3    5.15    0.24 
   1   8  -3    4.82    0.25 
   1   8  -3    5.19    0.25 
  -1  -8   3    4.78    0.23 
   0   8  -3   13.17    0.52 
   0   8  -3   13.68    0.52 
   0   8  -3   13.44    0.52 
   0   8  -3   12.01    0.50 
   0  -8   3   13.13    0.50 
  -1   8  -3    7.92    0.35 
  -1   8  -3    8.19    0.35 
  -1   8  -3    7.99    0.30 
  -1   8  -3    8.48    0.35 
  -1   8  -3    8.37    0.33 
   1  -8   3    8.39    0.33 
   1  -8   3    8.13    0.35 
  -2   8  -3   42.64    1.53 
  -2   8  -3   44.37    1.52 
  -2   8  -3   42.62    1.53 
  -2   8  -3   41.76    1.51 
  -2   8  -3   42.51    1.53 
   2  -8   3   43.89    1.54 
   2  -8   3   43.80    1.51 
  -3   8  -3   28.59    1.03 
  -3   8  -3   28.60    1.03 
  -3   8  -3   28.13    1.03 
  -3   8  -3   29.22    1.03 
  -3   8  -3   27.36    1.02 
   3  -8   3   30.00    1.01 
   3  -8   3   27.86    1.03 
  -4   8  -3   72.83    2.53 
  -4   8  -3   74.98    2.55 
  -4   8  -3   70.85    2.54 
  -4   8  -3   73.38    2.54 
  -4   8  -3   72.14    2.54 
   4  -8   3   71.83    2.54 
  -5   8  -3   28.23    0.98 
  -5   8  -3   27.82    1.00 
  -5   8  -3   26.06    0.96 
  -5   8  -3   26.68    0.96 
  -5   8  -3   28.19    0.99 
  -5   8  -3   26.90    0.99 
   5  -8   3   29.22    1.01 
   5  -8   3   27.11    1.00 
  -6   8  -3    0.22    0.06 
  -6   8  -3    0.24    0.05 
  -6   8  -3    0.21    0.07 
  -6   8  -3    0.21    0.06 
   6  -8   3    0.19    0.08 
   6  -8   3    0.24    0.06 
  -7   8  -3    2.85    0.17 
  -7   8  -3    2.98    0.16 
  -7   8  -3    3.11    0.18 
   7  -8   3    3.24    0.21 
   7  -8   3    2.87    0.17 
  -8   8  -3   67.16    2.33 
  -8   8  -3   65.37    2.31 
  -8   8  -3   65.34    2.33 
   8  -8   3   64.00    2.33 
   8  -8   3   68.29    2.36 
  -9   8  -3   18.15    0.71 
   9  -8   3   18.62    0.75 
 -10   8  -3    0.37    0.09 
  10  -8   3    0.37    0.13 
 -11   8  -3    0.33    0.10 
  11  -8   3    0.46    0.14 
 -12   8  -3    1.14    0.18 
  12  -8   3    1.11    0.19 
 -13   8  -3    1.15    0.15 
  13  -8   3    1.01    0.20 
 -14   8  -3    0.96    0.16 
  14  -8   3    1.05    0.22 
 -15   8  -3   12.40    0.58 
  11   7  -3   -0.02    0.11 
  10   7  -3    4.61    0.30 
   9   7  -3   16.93    0.79 
   9   7  -3   17.42    0.71 
   8   7  -3    9.76    0.54 
   8   7  -3   11.13    0.48 
   7   7  -3   28.66    1.10 
   7   7  -3   27.04    1.13 
   7   7  -3   29.68    1.08 
   6   7  -3    2.71    0.22 
   6   7  -3    2.88    0.27 
   6   7  -3    2.79    0.16 
   6   7  -3    3.30    0.25 
   6   7  -3    2.67    0.21 
   6   7  -3    2.78    0.23 
   5   7  -3    0.83    0.14 
   5   7  -3    0.71    0.12 
   5   7  -3    0.68    0.13 
   5   7  -3    0.46    0.09 
   5   7  -3    1.02    0.15 
  -5  -7   3    0.94    0.14 
   4   7  -3   76.33    2.78 
   4   7  -3   79.09    2.83 
   4   7  -3   81.43    2.80 
   4   7  -3   81.28    2.81 
   4   7  -3   76.97    2.80 
  -4  -7   3   84.64    2.80 
  -4  -7   3   74.53    2.75 
  -4  -7   3   79.51    2.75 
   3   7  -3   57.65    2.05 
   3   7  -3   55.84    2.02 
   3   7  -3   61.98    2.05 
   3   7  -3   58.35    2.04 
  -3  -7   3   55.52    1.99 
  -3  -7   3   59.95    2.03 
  -3  -7   3   52.50    1.98 
   2   7  -3   20.77    0.77 
   2   7  -3   20.26    0.77 
   2   7  -3   21.45    0.76 
   2   7  -3   20.12    0.77 
   2   7  -3   19.73    0.77 
  -2  -7   3   19.99    0.76 
   1   7  -3    0.66    0.10 
   1   7  -3    0.59    0.10 
   1   7  -3    0.48    0.07 
   1   7  -3    0.59    0.09 
   1   7  -3    0.32    0.06 
  -1  -7   3    0.57    0.08 
   0   7  -3    1.99    0.14 
   0   7  -3    1.80    0.12 
   0   7  -3    2.06    0.14 
   0   7  -3    1.84    0.13 
   0  -7   3    1.99    0.11 
  -1   7  -3    7.83    0.31 
  -1   7  -3    7.23    0.31 
  -1   7  -3    7.42    0.31 
  -1   7  -3    7.58    0.28 
  -1   7  -3    7.08    0.29 
   1  -7   3    7.76    0.31 
   1  -7   3    7.73    0.28 
   1  -7   3    7.64    0.29 
  -2   7  -3    8.45    0.34 
  -2   7  -3    8.30    0.33 
  -2   7  -3    8.87    0.34 
  -2   7  -3    8.17    0.34 
  -2   7  -3    8.52    0.33 
   2  -7   3    9.25    0.35 
   2  -7   3    8.64    0.32 
   2  -7   3    9.01    0.33 
  -3   7  -3  175.53    6.33 
  -3   7  -3  182.92    6.33 
  -3   7  -3  196.38    6.33 
  -3   7  -3  178.65    6.33 
  -3   7  -3  177.53    6.31 
   3  -7   3  184.27    6.33 
   3  -7   3  187.47    6.31 
   3  -7   3  184.67    6.33 
  -4   7  -3   79.46    2.72 
  -4   7  -3   80.06    2.74 
  -4   7  -3   78.21    2.72 
  -4   7  -3   76.04    2.72 
  -4   7  -3   78.19    2.71 
  -4   7  -3   77.22    2.70 
   4  -7   3   76.71    2.72 
   4  -7   3   79.80    2.73 
  -5   7  -3   47.02    1.67 
  -5   7  -3   48.34    1.69 
  -5   7  -3   46.90    1.69 
  -5   7  -3   48.89    1.69 
   5  -7   3   49.20    1.71 
   5  -7   3   48.54    1.70 
  -6   7  -3   49.69    1.75 
  -6   7  -3   47.89    1.75 
  -6   7  -3   51.10    1.73 
   6  -7   3   51.14    1.78 
   6  -7   3   48.72    1.75 
  -7   7  -3    1.39    0.12 
  -7   7  -3    1.54    0.10 
  -7   7  -3    1.63    0.12 
   7  -7   3    1.46    0.16 
   7  -7   3    1.55    0.13 
  -8   7  -3    0.04    0.05 
  -8   7  -3    0.03    0.06 
  -8   7  -3    0.14    0.06 
   8  -7   3    0.04    0.08 
   8  -7   3   -0.03    0.06 
  -9   7  -3    0.30    0.08 
   9  -7   3    0.51    0.13 
 -10   7  -3   15.26    0.60 
  10  -7   3   14.81    0.65 
 -11   7  -3    2.59    0.20 
  11  -7   3    2.49    0.26 
 -12   7  -3   10.62    0.48 
  12  -7   3   10.82    0.53 
 -13   7  -3    0.57    0.12 
  13  -7   3    0.64    0.18 
 -14   7  -3    3.08    0.25 
  14  -7   3    2.87    0.32 
 -15   7  -3    5.19    0.34 
  11   6  -3    0.34    0.12 
  10   6  -3    8.84    0.43 
  10   6  -3    9.00    0.51 
   9   6  -3    4.43    0.28 
   9   6  -3    4.58    0.35 
   8   6  -3   32.13    1.19 
   8   6  -3   34.28    1.28 
   8   6  -3   32.52    1.23 
   8   6  -3   30.94    1.20 
   7   6  -3   10.28    0.44 
   7   6  -3    9.91    0.46 
   7   6  -3   10.45    0.45 
   7   6  -3    8.61    0.49 
   7   6  -3    9.90    0.41 
  -7  -6   3    9.63    0.46 
  -7  -6   3   10.48    0.45 
   6   6  -3   11.96    0.46 
   6   6  -3   11.19    0.54 
   6   6  -3   12.18    0.49 
   6   6  -3   12.09    0.51 
   6   6  -3   11.96    0.51 
  -6  -6   3   11.22    0.49 
   5   6  -3   38.09    1.30 
   5   6  -3   34.03    1.34 
   5   6  -3   38.02    1.33 
  -5  -6   3   35.56    1.31 
  -5  -6   3   37.58    1.34 
   4   6  -3   17.64    0.64 
   4   6  -3   16.46    0.66 
   4   6  -3   16.40    0.61 
   4   6  -3   17.39    0.66 
   4   6  -3   16.45    0.65 
  -4  -6   3   16.12    0.64 
  -4  -6   3   17.38    0.62 
   3   6  -3   69.46    2.21 
   3   6  -3   62.59    2.20 
   3   6  -3   60.32    2.19 
   3   6  -3   62.18    2.18 
   3   6  -3   63.46    2.20 
  -3  -6   3   60.40    2.19 
  -3  -6   3   58.17    2.15 
  -3  -6   3   61.30    2.16 
   2   6  -3    9.43    0.38 
   2   6  -3    9.37    0.37 
   2   6  -3    9.04    0.38 
   2   6  -3    9.01    0.38 
   2   6  -3    8.54    0.36 
  -2  -6   3    9.57    0.37 
   1   6  -3   81.14    2.77 
   1   6  -3   79.23    2.77 
   1   6  -3   73.78    2.76 
   1   6  -3   80.21    2.77 
  -1  -6   3   82.86    2.76 
   0   6  -3   63.61    2.19 
   0   6  -3   60.91    2.18 
   0   6  -3   63.43    2.19 
   0   6  -3   60.65    2.19 
   0  -6   3   64.79    2.18 
  -1   6  -3    2.67    0.15 
  -1   6  -3    2.82    0.13 
  -1   6  -3    2.81    0.13 
  -1   6  -3    3.24    0.15 
  -1   6  -3    2.97    0.15 
   1  -6   3    3.19    0.15 
   1  -6   3    2.90    0.12 
   1  -6   3    2.99    0.13 
  -2   6  -3  243.75    8.36 
  -2   6  -3  241.78    8.36 
  -2   6  -3  235.08    8.35 
  -2   6  -3  237.36    8.35 
  -2   6  -3  261.54    8.40 
   2  -6   3  245.03    8.36 
   2  -6   3  238.29    8.36 
   2  -6   3  239.92    8.35 
  -3   6  -3    0.67    0.08 
  -3   6  -3    0.83    0.08 
  -3   6  -3    0.72    0.07 
  -3   6  -3    0.92    0.09 
   3  -6   3    0.94    0.09 
   3  -6   3    0.74    0.08 
  -4   6  -3    2.34    0.12 
  -4   6  -3    2.32    0.12 
  -4   6  -3    2.22    0.11 
  -4   6  -3    2.32    0.12 
  -4   6  -3    2.38    0.14 
   4  -6   3    2.62    0.14 
   4  -6   3    2.17    0.12 
  -5   6  -3    3.92    0.16 
  -5   6  -3    3.78    0.17 
  -5   6  -3    3.85    0.18 
  -5   6  -3    3.86    0.15 
   5  -6   3    3.99    0.21 
   5  -6   3    3.88    0.18 
  -6   6  -3    6.19    0.24 
  -6   6  -3    6.24    0.27 
  -6   6  -3    6.89    0.24 
  -6   6  -3    6.18    0.26 
   6  -6   3    6.51    0.27 
   6  -6   3    6.39    0.30 
  -7   6  -3   14.30    0.53 
  -7   6  -3   14.09    0.51 
  -7   6  -3   13.59    0.53 
   7  -6   3   13.76    0.53 
   7  -6   3   13.58    0.50 
   7  -6   3   13.91    0.56 
  -8   6  -3   14.05    0.53 
  -8   6  -3   14.05    0.55 
  -8   6  -3   14.51    0.55 
   8  -6   3   14.80    0.53 
   8  -6   3   14.88    0.60 
   8  -6   3   14.22    0.56 
  -9   6  -3   11.12    0.45 
  -9   6  -3   11.08    0.43 
  -9   6  -3   10.68    0.44 
   9  -6   3   11.41    0.50 
   9  -6   3   11.29    0.42 
 -10   6  -3    0.25    0.08 
  10  -6   3    0.12    0.12 
  10  -6   3    0.11    0.06 
 -11   6  -3   53.72    1.93 
  11  -6   3   53.67    1.98 
 -12   6  -3    0.48    0.11 
  12  -6   3    0.28    0.14 
 -13   6  -3    0.10    0.10 
  13  -6   3    0.16    0.14 
 -14   6  -3    1.37    0.21 
  14  -6   3    1.22    0.22 
 -15   6  -3    9.13    0.47 
  12   5  -3   10.93    0.49 
  11   5  -3   13.44    0.56 
  11   5  -3   12.44    0.65 
  10   5  -3    0.26    0.14 
  10   5  -3    0.38    0.12 
  10   5  -3    0.26    0.11 
   9   5  -3    0.15    0.09 
   9   5  -3    0.13    0.09 
   9   5  -3    0.12    0.12 
   8   5  -3    6.98    0.34 
   8   5  -3    7.43    0.40 
   8   5  -3    7.09    0.33 
   8   5  -3    6.99    0.36 
  -8  -5   3    7.07    0.35 
  -8  -5   3    6.90    0.34 
   7   5  -3   36.87    1.32 
   7   5  -3   34.30    1.30 
   7   5  -3   35.67    1.29 
   7   5  -3   34.63    1.36 
   7   5  -3   35.34    1.32 
  -7  -5   3   37.04    1.31 
  -7  -5   3   36.45    1.32 
   6   5  -3    0.32    0.07 
   6   5  -3    0.18    0.08 
   6   5  -3    0.28    0.08 
   6   5  -3    0.41    0.08 
  -6  -5   3    0.37    0.08 
  -6  -5   3    0.38    0.08 
  -6  -5   3    0.41    0.08 
   5   5  -3   16.91    0.62 
   5   5  -3   17.73    0.66 
   5   5  -3   16.20    0.64 
  -5  -5   3   17.71    0.65 
  -5  -5   3   16.47    0.63 
  -5  -5   3   16.62    0.64 
   4   5  -3   39.31    1.39 
   4   5  -3   37.28    1.41 
   4   5  -3   40.64    1.41 
   4   5  -3   38.56    1.37 
  -4  -5   3   40.37    1.38 
  -4  -5   3   38.90    1.40 
   3   5  -3   28.92    1.07 
   3   5  -3   28.41    1.06 
   3   5  -3   28.67    1.05 
   3   5  -3   29.55    1.03 
   3   5  -3   29.30    1.07 
  -3  -5   3   29.88    1.04 
  -3  -5   3   31.53    1.06 
   2   5  -3    0.52    0.08 
   2   5  -3    0.51    0.07 
   2   5  -3    0.51    0.08 
   2   5  -3    0.56    0.08 
   2   5  -3    0.37    0.06 
  -2  -5   3    0.61    0.07 
   1   5  -3    1.66    0.11 
   1   5  -3    1.96    0.12 
   1   5  -3    2.07    0.10 
   1   5  -3    1.78    0.11 
  -1  -5   3    1.93    0.10 
   0   5  -3    3.68    0.16 
   0   5  -3    3.66    0.15 
   0   5  -3    3.46    0.17 
   0   5  -3    3.80    0.17 
   0  -5   3    3.82    0.15 
  -1   5  -3   16.09    0.57 
  -1   5  -3   15.74    0.57 
  -1   5  -3   15.91    0.57 
   1  -5   3   15.77    0.56 
   1  -5   3   15.12    0.55 
   1  -5   3   15.92    0.57 
  -2   5  -3  137.49    4.92 
  -2   5  -3  144.57    4.92 
  -2   5  -3  145.63    4.94 
  -2   5  -3  143.44    4.92 
   2  -5   3  144.99    4.93 
   2  -5   3  141.80    4.93 
  -3   5  -3   73.32    2.49 
  -3   5  -3   72.68    2.49 
  -3   5  -3   71.31    2.49 
  -3   5  -3   70.52    2.49 
  -3   5  -3   71.69    2.52 
   3  -5   3   72.42    2.51 
   3  -5   3   71.98    2.49 
  -4   5  -3  153.11    5.41 
  -4   5  -3  160.18    5.41 
  -4   5  -3  154.37    5.41 
  -4   5  -3  158.04    5.45 
   4  -5   3  157.01    5.43 
   4  -5   3  159.78    5.41 
  -5   5  -3   49.91    1.78 
  -5   5  -3   51.48    1.78 
  -5   5  -3   51.80    1.78 
   5  -5   3   50.07    1.79 
   5  -5   3   51.32    1.82 
   5  -5   3   52.28    1.78 
  -6   5  -3    8.26    0.32 
  -6   5  -3    8.38    0.33 
  -6   5  -3    8.71    0.31 
  -6   5  -3    8.87    0.33 
   6  -5   3    8.12    0.32 
   6  -5   3    8.04    0.36 
   6  -5   3    8.30    0.33 
  -7   5  -3    9.68    0.36 
  -7   5  -3    9.68    0.38 
  -7   5  -3    9.80    0.38 
   7  -5   3    9.14    0.38 
   7  -5   3    9.53    0.42 
   7  -5   3    9.50    0.37 
  -8   5  -3   31.76    1.15 
  -8   5  -3   32.70    1.14 
  -8   5  -3   32.50    1.16 
  -8   5  -3   31.44    1.16 
   8  -5   3   31.79    1.16 
   8  -5   3   31.81    1.14 
   8  -5   3   32.79    1.20 
  -9   5  -3    0.33    0.07 
  -9   5  -3    0.28    0.07 
  -9   5  -3    0.19    0.06 
   9  -5   3    0.29    0.07 
   9  -5   3    0.17    0.12 
   9  -5   3    0.22    0.11 
 -10   5  -3   40.03    1.47 
  10  -5   3   40.90    1.51 
  10  -5   3   40.58    1.45 
 -11   5  -3    0.28    0.09 
  11  -5   3    0.35    0.13 
 -12   5  -3    0.46    0.11 
  12  -5   3    0.61    0.16 
 -13   5  -3   20.41    0.84 
  13  -5   3   21.89    0.91 
 -14   5  -3   16.63    0.72 
  14  -5   3   17.26    0.78 
  13   4  -3    1.49    0.20 
  12   4  -3    7.33    0.37 
  12   4  -3    7.55    0.47 
  11   4  -3    0.81    0.18 
  11   4  -3    0.67    0.12 
  11   4  -3    0.41    0.13 
  10   4  -3   11.87    0.57 
  10   4  -3   11.58    0.50 
  10   4  -3   11.49    0.51 
   9   4  -3    8.60    0.40 
   9   4  -3    9.27    0.47 
   9   4  -3    8.94    0.40 
   9   4  -3    8.30    0.42 
  -9  -4   3    8.46    0.41 
  -9  -4   3    8.99    0.40 
   8   4  -3   38.32    1.40 
   8   4  -3   38.24    1.38 
   8   4  -3   37.95    1.38 
   8   4  -3   39.11    1.41 
   8   4  -3   39.37    1.45 
  -8  -4   3   36.11    1.39 
  -8  -4   3   38.19    1.40 
   7   4  -3   17.16    0.67 
   7   4  -3   17.64    0.69 
   7   4  -3   17.16    0.67 
   7   4  -3   17.40    0.69 
  -7  -4   3   16.95    0.68 
  -7  -4   3   18.81    0.68 
   6   4  -3   25.02    0.89 
   6   4  -3   24.56    0.90 
   6   4  -3   24.33    0.92 
   6   4  -3   25.32    0.92 
  -6  -4   3   24.14    0.91 
  -6  -4   3   23.38    0.90 
  -6  -4   3   24.22    0.90 
   5   4  -3   37.41    1.37 
   5   4  -3   39.29    1.38 
   5   4  -3   39.62    1.40 
  -5  -4   3   40.76    1.39 
  -5  -4   3   40.03    1.39 
  -5  -4   3   35.52    1.38 
   4   4  -3   82.81    2.94 
   4   4  -3   85.95    2.97 
   4   4  -3   84.90    2.97 
   4   4  -3   84.58    2.97 
   4   4  -3   87.62    2.96 
  -4  -4   3   78.25    2.95 
  -4  -4   3   91.51    2.97 
  -4  -4   3   84.74    2.96 
   3   4  -3  101.54    3.57 
   3   4  -3  102.63    3.55 
   3   4  -3   99.50    3.58 
   3   4  -3  103.20    3.58 
   3   4  -3  104.36    3.58 
  -3  -4   3  107.35    3.58 
   2   4  -3   36.83    1.28 
   2   4  -3   36.28    1.28 
   2   4  -3   37.42    1.27 
   2   4  -3   35.58    1.25 
   2   4  -3   35.51    1.28 
  -2  -4   3   36.87    1.28 
  -2  -4   3   35.86    1.26 
   1   4  -3    0.82    0.07 
   1   4  -3    0.78    0.07 
   1   4  -3    0.80    0.07 
  -1  -4   3    0.85    0.06 
   0   4  -3   27.89    0.96 
   0   4  -3   27.46    0.95 
   0   4  -3   28.66    0.96 
   0   4  -3   27.17    0.96 
   0  -4   3   24.23    0.95 
   0  -4   3   28.51    0.95 
  -1   4  -3   30.28    1.02 
  -1   4  -3   29.50    1.02 
  -1   4  -3   28.95    1.02 
   1  -4   3   28.64    1.02 
   1  -4   3   29.06    1.02 
  -2   4  -3  196.01    6.73 
  -2   4  -3  197.95    6.72 
  -2   4  -3  191.92    6.72 
  -2   4  -3  197.21    6.71 
   2  -4   3  194.90    6.72 
   2  -4   3  194.51    6.73 
  -3   4  -3    2.47    0.12 
  -3   4  -3    2.43    0.10 
  -3   4  -3    2.59    0.10 
   3  -4   3    2.53    0.13 
   3  -4   3    2.23    0.11 
  -4   4  -3    0.56    0.06 
  -4   4  -3    0.92    0.10 
  -4   4  -3    0.51    0.06 
  -4   4  -3    0.56    0.07 
   4  -4   3    0.60    0.09 
   4  -4   3    0.54    0.06 
   4  -4   3    0.62    0.07 
  -5   4  -3    7.94    0.31 
  -5   4  -3    8.43    0.31 
  -5   4  -3    7.98    0.32 
   5  -4   3    8.48    0.35 
   5  -4   3    8.21    0.32 
   5  -4   3    8.02    0.32 
  -6   4  -3   22.44    0.81 
  -6   4  -3   22.50    0.81 
  -6   4  -3   22.11    0.79 
  -6   4  -3   22.80    0.81 
   6  -4   3   22.10    0.81 
   6  -4   3   22.46    0.84 
  -7   4  -3   43.01    1.54 
  -7   4  -3   42.37    1.53 
  -7   4  -3   45.00    1.54 
  -7   4  -3   44.96    1.55 
  -7   4  -3   42.08    1.52 
   7  -4   3   43.33    1.54 
   7  -4   3   44.15    1.58 
  -8   4  -3  101.46    3.47 
  -8   4  -3   95.33    3.45 
  -8   4  -3   97.46    3.46 
  -8   4  -3   97.42    3.46 
   8  -4   3  103.57    3.47 
   8  -4   3  101.38    3.51 
  -9   4  -3    0.86    0.13 
  -9   4  -3    1.20    0.13 
   9  -4   3    0.98    0.13 
   9  -4   3    1.05    0.18 
 -10   4  -3    4.13    0.24 
  10  -4   3    4.74    0.25 
  10  -4   3    4.53    0.30 
 -11   4  -3   19.96    0.78 
  11  -4   3   20.33    0.78 
  11  -4   3   19.50    0.82 
 -12   4  -3    0.19    0.09 
  12  -4   3    0.28    0.15 
 -13   4  -3    4.17    0.28 
  13  -4   3    3.97    0.34 
 -14   4  -3    8.93    0.45 
  14  -4   3    8.18    0.55 
  13   3  -3    1.99    0.25 
  13   3  -3    2.19    0.28 
  13   3  -3    1.84    0.20 
  12   3  -3    6.65    0.43 
  12   3  -3    7.02    0.35 
  12   3  -3    6.76    0.39 
  11   3  -3   12.14    0.61 
  11   3  -3   13.70    0.54 
  11   3  -3   12.81    0.57 
  10   3  -3   13.58    0.58 
  10   3  -3   13.86    0.63 
  10   3  -3   12.90    0.56 
 -10  -3   3   14.57    0.59 
 -10  -3   3   13.66    0.58 
   9   3  -3   43.22    1.56 
   9   3  -3   44.00    1.61 
   9   3  -3   43.47    1.55 
   9   3  -3   43.73    1.57 
   9   3  -3   42.69    1.56 
  -9  -3   3   40.43    1.56 
  -9  -3   3   42.72    1.57 
   8   3  -3   24.47    0.92 
   8   3  -3   24.60    0.90 
   8   3  -3   23.92    0.92 
   8   3  -3   23.62    0.90 
  -8  -3   3   22.86    0.91 
  -8  -3   3   25.18    0.92 
   7   3  -3    2.85    0.19 
   7   3  -3    2.78    0.18 
   7   3  -3    2.71    0.18 
   7   3  -3    2.99    0.19 
  -7  -3   3    2.81    0.18 
  -7  -3   3    3.09    0.18 
   6   3  -3    5.90    0.28 
   6   3  -3    6.01    0.27 
   6   3  -3    5.99    0.28 
   6   3  -3    5.99    0.27 
  -6  -3   3    6.34    0.28 
  -6  -3   3    6.01    0.28 
  -6  -3   3    6.16    0.27 
   5   3  -3   17.75    0.65 
   5   3  -3   18.01    0.67 
   5   3  -3   18.98    0.66 
  -5  -3   3   17.08    0.66 
  -5  -3   3   17.82    0.66 
  -5  -3   3   16.70    0.66 
   4   3  -3  113.33    4.10 
   4   3  -3  117.68    4.09 
   4   3  -3  117.85    4.09 
   4   3  -3  126.35    4.10 
   4   3  -3  122.34    4.10 
  -4  -3   3  121.08    4.10 
  -4  -3   3  113.43    4.09 
  -4  -3   3  113.30    4.09 
   3   3  -3   27.02    0.91 
   3   3  -3   24.76    0.91 
   3   3  -3   26.19    0.91 
   3   3  -3   23.85    0.89 
  -3  -3   3   26.30    0.90 
  -3  -3   3   25.02    0.90 
  -3  -3   3   23.87    0.90 
   2   3  -3  151.67    5.35 
   2   3  -3  167.54    5.39 
   2   3  -3  153.68    5.35 
  -2  -3   3  163.99    5.35 
  -2  -3   3  140.02    5.34 
   1   3  -3  132.67    4.65 
   1   3  -3  145.98    4.66 
   1   3  -3  136.11    4.65 
  -1  -3   3  139.43    4.64 
  -1  -3   3  125.28    4.64 
  -1  -3   3  130.31    4.65 
   0   3  -3  106.02    3.66 
   0   3  -3  107.64    3.67 
   0   3  -3  109.28    3.67 
   0   3  -3  101.23    3.66 
   0   3  -3  108.33    3.67 
  -1   3  -3    8.05    0.30 
  -1   3  -3    8.03    0.31 
  -1   3  -3    7.93    0.28 
   1  -3   3    8.01    0.28 
   1  -3   3    7.98    0.30 
  -2   3  -3   21.23    0.76 
  -2   3  -3   21.63    0.77 
   2  -3   3   21.79    0.76 
   2  -3   3   21.75    0.77 
   2  -3   3   20.89    0.74 
  -3   3  -3   33.63    1.14 
  -3   3  -3   32.55    1.17 
  -3   3  -3   33.08    1.16 
   3  -3   3   32.96    1.16 
   3  -3   3   33.01    1.18 
  -4   3  -3    0.43    0.05 
  -4   3  -3    0.45    0.05 
  -4   3  -3    0.45    0.07 
  -4   3  -3    0.40    0.07 
   4  -3   3    0.42    0.07 
   4  -3   3    0.48    0.08 
  -5   3  -3  166.56    5.56 
  -5   3  -3  159.91    5.54 
  -5   3  -3  161.56    5.55 
   5  -3   3  163.42    5.58 
   5  -3   3  153.07    5.56 
  -6   3  -3   86.23    2.88 
  -6   3  -3   81.76    2.87 
  -6   3  -3   86.32    2.85 
  -6   3  -3   80.65    2.87 
  -6   3  -3   78.90    2.85 
   6  -3   3   83.10    2.90 
   6  -3   3   80.31    2.88 
  -7   3  -3   42.17    1.48 
  -7   3  -3   42.63    1.49 
  -7   3  -3   41.99    1.46 
  -7   3  -3   41.00    1.48 
  -7   3  -3   41.94    1.47 
   7  -3   3   41.56    1.49 
   7  -3   3   40.54    1.51 
  -8   3  -3    2.63    0.17 
  -8   3  -3    2.76    0.17 
  -8   3  -3    2.66    0.17 
   8  -3   3    2.83    0.18 
   8  -3   3    2.96    0.22 
  -9   3  -3    3.82    0.22 
   9  -3   3    4.23    0.24 
   9  -3   3    3.64    0.26 
 -10   3  -3    0.16    0.08 
  10  -3   3    0.07    0.08 
  10  -3   3    0.00    0.12 
 -11   3  -3    0.80    0.12 
  11  -3   3    0.91    0.16 
  11  -3   3    0.83    0.13 
 -12   3  -3   21.34    0.87 
  12  -3   3   21.84    0.92 
  12  -3   3   22.99    0.89 
 -13   3  -3    9.59    0.47 
  13  -3   3    9.83    0.53 
 -14   3  -3    6.39    0.38 
  14   2  -3    1.08    0.20 
  14   2  -3    1.55    0.18 
  14   2  -3    1.28    0.21 
  13   2  -3    5.92    0.31 
  13   2  -3    5.83    0.36 
  13   2  -3    6.02    0.40 
  12   2  -3   10.76    0.47 
  12   2  -3   10.62    0.54 
  12   2  -3   10.93    0.51 
  11   2  -3   22.29    0.90 
  11   2  -3   22.57    0.87 
  11   2  -3   22.48    0.93 
 -11  -2   3   23.46    0.91 
 -11  -2   3   23.01    0.90 
  10   2  -3   -0.08    0.10 
  10   2  -3    0.13    0.08 
  10   2  -3    0.12    0.11 
  10   2  -3    0.06    0.09 
 -10  -2   3    0.15    0.08 
 -10  -2   3    0.18    0.08 
   9   2  -3   11.99    0.51 
   9   2  -3   12.43    0.54 
   9   2  -3   12.72    0.54 
   9   2  -3   13.21    0.54 
  -9  -2   3   12.31    0.53 
  -9  -2   3   14.28    0.54 
   8   2  -3    8.74    0.39 
   8   2  -3    8.75    0.38 
   8   2  -3    7.70    0.36 
   8   2  -3    8.86    0.38 
  -8  -2   3    8.87    0.38 
  -8  -2   3    8.77    0.38 
   7   2  -3   31.48    1.17 
   7   2  -3   31.98    1.17 
   7   2  -3   33.39    1.16 
   7   2  -3   32.67    1.17 
  -7  -2   3   32.43    1.17 
  -7  -2   3   30.86    1.17 
   6   2  -3   37.76    1.32 
   6   2  -3   36.52    1.32 
   6   2  -3   36.42    1.30 
   6   2  -3   36.30    1.31 
  -6  -2   3   36.82    1.31 
  -6  -2   3   35.66    1.31 
   5   2  -3   45.88    1.60 
   5   2  -3   43.63    1.61 
   5   2  -3   44.42    1.60 
   5   2  -3   45.35    1.61 
  -5  -2   3   46.16    1.60 
  -5  -2   3   46.61    1.60 
   4   2  -3    0.09    0.04 
   4   2  -3    0.08    0.04 
   4   2  -3    0.19    0.05 
   4   2  -3    0.04    0.05 
  -4  -2   3    0.12    0.04 
  -4  -2   3    0.12    0.04 
  -4  -2   3   -0.02    0.04 
   3   2  -3  185.71    6.53 
   3   2  -3  202.44    6.53 
   3   2  -3  190.27    6.54 
   3   2  -3  187.39    6.53 
  -3  -2   3  188.10    6.54 
  -3  -2   3  183.11    6.52 
  -3  -2   3  189.21    6.53 
   2   2  -3  181.42    6.25 
   2   2  -3  175.92    6.25 
   2   2  -3  173.61    6.28 
  -2  -2   3  174.49    6.25 
  -2  -2   3  196.03    6.26 
  -2  -2   3  189.26    6.31 
   1   2  -3   42.54    1.52 
   1   2  -3   42.31    1.51 
   1   2  -3   45.77    1.51 
  -1  -2   3   44.61    1.50 
  -1  -2   3   44.98    1.50 
  -1  -2   3   41.30    1.52 
   0   2  -3  460.64   15.57 
   0   2  -3  454.78   15.58 
   0   2  -3  436.07   15.55 
  -1   2  -3   24.12    0.87 
  -1   2  -3   24.47    0.87 
   1  -2   3   24.61    0.87 
   1  -2   3   24.94    0.87 
  -2   2  -3    2.27    0.12 
  -2   2  -3    2.47    0.12 
   2  -2   3    2.40    0.12 
   2  -2   3    2.45    0.13 
  -3   2  -3  230.18    7.79 
  -3   2  -3  222.73    7.81 
  -3   2  -3  231.48    7.80 
  -3   2  -3  223.34    7.81 
   3  -2   3  221.60    7.80 
   3  -2   3  229.31    7.81 
  -4   2  -3  345.40   12.20 
  -4   2  -3  361.67   12.24 
  -4   2  -3  364.79   12.24 
  -4   2  -3  353.40   12.19 
   4  -2   3  347.53   12.19 
   4  -2   3  351.91   12.26 
  -5   2  -3   15.64    0.58 
  -5   2  -3   14.74    0.55 
  -5   2  -3   15.18    0.53 
  -5   2  -3   15.80    0.54 
  -5   2  -3   15.07    0.55 
   5  -2   3   14.82    0.57 
   5  -2   3   14.99    0.59 
   5  -2   3   14.39    0.53 
  -6   2  -3    2.57    0.16 
  -6   2  -3    2.19    0.13 
  -6   2  -3    2.30    0.13 
  -6   2  -3    2.33    0.12 
   6  -2   3    2.39    0.16 
   6  -2   3    2.31    0.11 
   6  -2   3    2.35    0.17 
  -7   2  -3    3.13    0.16 
  -7   2  -3    2.58    0.16 
  -7   2  -3    2.84    0.16 
   7  -2   3    2.90    0.19 
   7  -2   3    3.19    0.14 
   7  -2   3    2.67    0.20 
  -8   2  -3   15.66    0.61 
  -8   2  -3   15.28    0.61 
  -8   2  -3   16.78    0.61 
   8  -2   3   14.63    0.64 
   8  -2   3   15.42    0.63 
   8  -2   3   16.50    0.60 
  -9   2  -3   70.65    2.47 
   9  -2   3   67.90    2.49 
   9  -2   3   70.46    2.50 
 -10   2  -3   16.28    0.67 
  10  -2   3   15.93    0.71 
  10  -2   3   18.59    0.71 
 -11   2  -3    5.12    0.30 
  11  -2   3    5.32    0.35 
  11  -2   3    5.47    0.32 
 -12   2  -3   29.18    1.13 
  12  -2   3   30.26    1.15 
  12  -2   3   28.82    1.17 
 -13   2  -3    0.35    0.12 
  13  -2   3    0.81    0.18 
 -14   2  -3    6.02    0.37 
  14   1  -3   10.97    0.54 
  14   1  -3   10.71    0.56 
  14   1  -3   10.79    0.46 
  13   1  -3    3.60    0.30 
  13   1  -3    3.36    0.23 
  13   1  -3    3.64    0.32 
  12   1  -3   17.74    0.70 
  12   1  -3   18.26    0.75 
  12   1  -3   17.69    0.77 
 -12  -1   3   17.85    0.74 
  11   1  -3   10.57    0.50 
  11   1  -3   10.11    0.45 
  11   1  -3   11.23    0.53 
 -11  -1   3   11.42    0.49 
 -11  -1   3   11.35    0.49 
  10   1  -3   40.72    1.49 
  10   1  -3   40.13    1.46 
  10   1  -3   40.03    1.47 
  10   1  -3   40.22    1.48 
 -10  -1   3   40.67    1.48 
 -10  -1   3   40.61    1.48 
   9   1  -3   80.79    2.93 
   9   1  -3   85.60    2.96 
   9   1  -3   80.70    2.95 
   9   1  -3   87.63    2.96 
  -9  -1   3   82.37    2.95 
  -9  -1   3   85.16    2.96 
   8   1  -3  154.46    5.49 
   8   1  -3  160.06    5.50 
   8   1  -3  158.24    5.50 
  -8  -1   3  160.88    5.51 
   7   1  -3    8.22    0.37 
   7   1  -3    8.46    0.37 
   7   1  -3    8.98    0.39 
  -7  -1   3    8.84    0.37 
  -7  -1   3    8.87    0.37 
   6   1  -3    6.99    0.30 
   6   1  -3    6.96    0.31 
   6   1  -3    6.84    0.30 
  -6  -1   3    6.53    0.29 
   5   1  -3    0.09    0.04 
   5   1  -3    0.12    0.06 
   5   1  -3    0.08    0.05 
  -5  -1   3    0.07    0.04 
  -5  -1   3    0.06    0.05 
  -5  -1   3    0.09    0.04 
   4   1  -3   49.04    1.71 
   4   1  -3   49.72    1.71 
   4   1  -3   47.19    1.72 
   4   1  -3   48.30    1.71 
  -4  -1   3   49.36    1.71 
  -4  -1   3   48.25    1.72 
  -4  -1   3   49.75    1.71 
   3   1  -3  196.35    6.34 
   3   1  -3  183.72    6.33 
   3   1  -3  188.78    6.33 
   3   1  -3  165.73    6.34 
  -3  -1   3  178.56    6.35 
  -3  -1   3  190.97    6.33 
  -3  -1   3  183.37    6.33 
   2   1  -3  363.93   12.54 
   2   1  -3  355.09   12.55 
   2   1  -3  374.07   12.52 
   2   1  -3  368.92   12.55 
  -2  -1   3  353.50   12.54 
  -2  -1   3  364.21   12.51 
   1   1  -3  135.71    4.70 
   1   1  -3  130.27    4.68 
   1   1  -3  130.25    4.70 
   1   1  -3  137.55    4.69 
  -1  -1   3  137.32    4.70 
  -1  -1   3  137.50    4.68 
  -1  -1   3  144.41    4.69 
   0   1  -3    5.50    0.23 
   0   1  -3    5.45    0.22 
   0   1  -3    5.36    0.22 
   0  -1   3    4.97    0.22 
   0  -1   3    5.58    0.20 
   0  -1   3    5.48    0.23 
  -1   1  -3   44.46    1.55 
  -1   1  -3   44.82    1.55 
   1  -1   3   44.14    1.55 
   1  -1   3   44.09    1.53 
   1  -1   3   43.96    1.55 
  -2   1  -3    2.75    0.11 
  -2   1  -3    3.32    0.12 
   2  -1   3    2.86    0.14 
   2  -1   3    2.67    0.14 
  -3   1  -3   13.26    0.48 
  -3   1  -3   14.11    0.51 
  -3   1  -3   13.55    0.51 
  -3   1  -3   13.12    0.49 
   3  -1   3   13.31    0.51 
   3  -1   3   13.73    0.51 
  -4   1  -3    4.12    0.17 
  -4   1  -3    3.83    0.15 
  -4   1  -3    3.91    0.16 
  -4   1  -3    4.08    0.20 
  -4   1  -3    3.91    0.17 
   4  -1   3    4.00    0.20 
   4  -1   3    4.10    0.16 
   4  -1   3    3.65    0.20 
  -5   1  -3    2.49    0.15 
  -5   1  -3    2.38    0.13 
  -5   1  -3    2.26    0.13 
  -5   1  -3    2.39    0.12 
   5  -1   3    2.41    0.16 
   5  -1   3    2.13    0.16 
   5  -1   3    2.33    0.11 
  -6   1  -3    5.67    0.25 
  -6   1  -3    5.13    0.25 
  -6   1  -3    5.71    0.24 
   6  -1   3    5.93    0.23 
   6  -1   3    5.80    0.28 
   6  -1   3    5.52    0.28 
  -7   1  -3   51.66    1.71 
  -7   1  -3   47.78    1.71 
  -7   1  -3   46.14    1.70 
   7  -1   3   44.86    1.68 
   7  -1   3   50.09    1.74 
   7  -1   3   47.68    1.74 
  -8   1  -3   61.55    2.19 
  -8   1  -3   61.85    2.23 
   8  -1   3   61.98    2.22 
   8  -1   3   61.85    2.22 
  -9   1  -3    5.24    0.28 
   9  -1   3    5.44    0.31 
   9  -1   3    5.20    0.32 
 -10   1  -3    2.21    0.19 
  10  -1   3    2.45    0.23 
  10  -1   3    2.22    0.24 
 -11   1  -3    0.24    0.10 
  11  -1   3    0.33    0.12 
  11  -1   3    0.39    0.14 
 -12   1  -3    0.17    0.11 
  12  -1   3    0.12    0.12 
  12  -1   3    0.41    0.16 
 -13   1  -3   10.37    0.52 
  13  -1   3   10.96    0.62 
  13  -1   3   11.00    0.56 
  15   0  -3    8.07    0.49 
  15   0  -3    8.42    0.36 
  14   0  -3    8.98    0.48 
  14   0  -3    8.95    0.39 
  14   0  -3    8.38    0.48 
  13   0  -3    3.96    0.30 
  13   0  -3    3.36    0.29 
  13   0  -3    3.26    0.22 
 -13   0   3    3.42    0.29 
  12   0  -3   14.99    0.59 
  12   0  -3   14.92    0.66 
  12   0  -3   14.85    0.65 
 -12   0   3   14.39    0.63 
  11   0  -3   37.83    1.44 
  11   0  -3   41.21    1.51 
  11   0  -3   40.57    1.49 
 -11   0   3   40.57    1.48 
 -11   0   3   40.28    1.48 
  10   0  -3    4.04    0.23 
  10   0  -3    4.25    0.23 
  10   0  -3    4.07    0.27 
  10   0  -3    4.40    0.26 
 -10   0   3    4.20    0.25 
 -10   0   3    4.39    0.25 
   9   0  -3   23.96    0.91 
   9   0  -3   25.31    0.91 
   9   0  -3   23.62    0.95 
   9   0  -3   24.63    0.89 
  -9   0   3   23.70    0.91 
  -9   0   3   23.68    0.91 
   8   0  -3    0.44    0.08 
   8   0  -3    0.62    0.12 
   8   0  -3    0.49    0.08 
   8   0  -3    0.44    0.08 
  -8   0   3    0.59    0.11 
  -8   0   3    0.49    0.08 
   7   0  -3    0.59    0.10 
   7   0  -3    0.83    0.13 
   7   0  -3    0.70    0.11 
   7   0  -3    0.61    0.09 
  -7   0   3    0.67    0.10 
  -7   0   3    0.48    0.07 
   6   0  -3   12.91    0.52 
   6   0  -3   13.52    0.50 
   6   0  -3   12.64    0.50 
  -6   0   3   12.97    0.50 
  -6   0   3   12.92    0.50 
   5   0  -3  116.09    4.12 
   5   0  -3  120.98    4.10 
   5   0  -3  116.43    4.10 
  -5   0   3  121.33    4.10 
  -5   0   3  119.82    4.10 
  -5   0   3  115.09    4.11 
   4   0  -3  225.06    7.81 
   4   0  -3  220.72    7.80 
   4   0  -3  219.58    7.82 
   4   0  -3  223.87    7.81 
  -4   0   3  226.08    7.85 
  -4   0   3  238.16    7.82 
  -4   0   3  230.74    7.80 
  -4   0   3  229.18    7.82 
   3   0  -3    6.60    0.26 
   3   0  -3    6.04    0.24 
   3   0  -3    6.10    0.24 
   3   0  -3    6.06    0.24 
  -3   0   3    6.12    0.24 
  -3   0   3    5.90    0.24 
  -3   0   3    6.44    0.26 
  -3   0   3    6.14    0.24 
   2   0  -3  103.73    3.76 
   2   0  -3  105.04    3.76 
   2   0  -3  112.49    3.78 
   2   0  -3  110.97    3.77 
   2   0  -3  109.55    3.76 
  -2   0   3  112.19    3.76 
  -2   0   3  109.87    3.78 
  -2   0   3  109.12    3.76 
  -2   0   3  104.76    3.76 
  -2   0   3  112.48    3.76 
   1   0  -3    0.38    0.07 
   1   0  -3    0.52    0.05 
   1   0  -3    0.30    0.05 
   1   0  -3    0.53    0.05 
  -1   0   3    0.50    0.04 
  -1   0   3    0.42    0.08 
  -1   0   3    0.53    0.06 
  -1   0   3    0.48    0.05 
  -1   0   3    0.46    0.08 
   0   0  -3    2.88    0.12 
   0   0  -3    3.22    0.16 
   0   0  -3    3.14    0.15 
   0   0  -3    3.13    0.12 
   0   0   3    3.16    0.12 
   0   0   3    3.07    0.12 
   0   0   3    3.10    0.13 
   0   0   3    3.12    0.16 
  -1   0  -3    2.93    0.12 
  -1   0  -3    2.86    0.15 
  -1   0  -3    3.12    0.15 
  -1   0  -3    2.96    0.12 
  -1   0  -3    2.71    0.14 
   1   0   3    3.05    0.15 
   1   0   3    2.87    0.15 
   1   0   3    2.91    0.11 
   1   0   3    3.01    0.11 
   1   0   3    3.09    0.13 
  -2   0  -3   79.12    3.02 
  -2   0  -3   86.10    3.01 
  -2   0  -3   90.47    3.03 
  -2   0  -3   90.35    3.01 
   2   0   3   87.58    3.03 
   2   0   3   88.31    3.00 
   2   0   3   87.52    3.01 
   2   0   3   86.58    3.03 
  -3   0  -3  331.19   11.29 
  -3   0  -3  328.03   11.27 
  -3   0  -3  321.50   11.29 
  -3   0  -3  313.65   11.26 
  -3   0  -3  332.34   11.27 
   3   0   3  339.38   11.27 
   3   0   3  324.83   11.27 
   3   0   3  325.80   11.33 
  -4   0  -3   67.46    2.20 
  -4   0  -3   62.55    2.20 
  -4   0  -3   60.06    2.23 
  -4   0  -3   61.76    2.20 
   4   0   3   63.12    2.19 
   4   0   3   63.93    2.23 
   4   0   3   62.42    2.22 
  -5   0  -3  107.65    4.06 
  -5   0  -3  120.68    4.07 
  -5   0  -3  124.00    4.07 
   5   0   3  122.47    4.10 
   5   0   3  108.43    4.10 
   5   0   3  120.73    4.05 
  -6   0  -3  107.80    3.65 
  -6   0  -3  107.65    3.65 
  -6   0  -3  109.96    3.65 
   6   0   3   99.36    3.68 
   6   0   3  102.54    3.67 
   6   0   3  100.80    3.63 
  -7   0  -3   29.65    1.07 
  -7   0  -3   29.03    1.08 
  -7   0  -3   27.62    1.07 
   7   0   3   30.11    1.05 
   7   0   3   30.35    1.11 
   7   0   3   28.61    1.10 
  -8   0  -3    0.21    0.08 
   8   0   3    0.12    0.10 
   8   0   3    0.37    0.12 
  -9   0  -3    0.31    0.09 
   9   0   3    0.34    0.12 
   9   0   3    0.15    0.12 
 -10   0  -3    1.37    0.17 
  10   0   3    1.07    0.16 
  10   0   3    1.21    0.21 
 -11   0  -3    8.14    0.43 
  11   0   3    8.72    0.47 
  11   0   3    9.25    0.47 
 -12   0  -3    1.20    0.20 
  12   0   3    1.26    0.22 
  12   0   3    1.48    0.21 
 -13   0  -3    0.09    0.12 
  13   0   3    0.37    0.18 
  13   0   3    0.44    0.15 
  15  -1  -3    0.42    0.09 
  15  -1  -3    0.18    0.18 
  14  -1  -3   -0.02    0.15 
  14  -1  -3    0.25    0.09 
  13  -1  -3    7.33    0.33 
  13  -1  -3    6.59    0.41 
  13  -1  -3    6.59    0.39 
 -13   1   3    6.91    0.37 
  12  -1  -3   42.12    1.61 
  12  -1  -3   42.37    1.55 
  12  -1  -3   45.32    1.61 
 -12   1   3   42.70    1.59 
  11  -1  -3   27.69    1.05 
  11  -1  -3   28.36    1.06 
 -11   1   3   28.76    1.08 
 -11   1   3   29.35    1.09 
  10  -1  -3   26.41    1.04 
  10  -1  -3   26.19    0.98 
  10  -1  -3   26.04    0.99 
  10  -1  -3   26.31    0.97 
 -10   1   3   25.55    0.99 
 -10   1   3   26.92    0.99 
   9  -1  -3    2.92    0.24 
   9  -1  -3    3.17    0.19 
   9  -1  -3    2.87    0.20 
   9  -1  -3    2.76    0.18 
  -9   1   3    3.25    0.20 
  -9   1   3    2.84    0.19 
   8  -1  -3   24.04    0.89 
   8  -1  -3   25.71    0.91 
   8  -1  -3   24.48    0.91 
   8  -1  -3   24.25    0.94 
  -8   1   3   23.44    0.91 
  -8   1   3   24.88    0.91 
   7  -1  -3   26.06    0.94 
   7  -1  -3   24.87    0.93 
   7  -1  -3   25.89    0.96 
  -7   1   3   25.70    0.94 
  -7   1   3   24.97    0.93 
   6  -1  -3  114.26    3.97 
   6  -1  -3  114.27    3.97 
   6  -1  -3  115.99    3.99 
  -6   1   3  112.41    3.97 
  -6   1   3  114.05    3.96 
   5  -1  -3   19.90    0.75 
   5  -1  -3   20.96    0.78 
   5  -1  -3   20.58    0.75 
   5  -1  -3   20.50    0.75 
  -5   1   3   21.02    0.75 
  -5   1   3   20.66    0.77 
  -5   1   3   20.52    0.75 
   4  -1  -3    1.41    0.12 
   4  -1  -3    1.33    0.09 
   4  -1  -3    1.26    0.09 
   4  -1  -3    1.26    0.09 
  -4   1   3    1.44    0.09 
  -4   1   3    1.43    0.11 
  -4   1   3    1.38    0.09 
  -4   1   3    1.50    0.09 
   3  -1  -3   29.03    1.04 
   3  -1  -3   29.68    1.06 
   3  -1  -3   29.05    1.03 
   3  -1  -3   28.82    1.03 
   3  -1  -3   29.63    1.03 
  -3   1   3   28.28    1.03 
  -3   1   3   29.26    1.03 
  -3   1   3   29.69    1.03 
  -3   1   3   29.61    1.03 
  -3   1   3   29.31    1.05 
   2  -1  -3  243.54    8.52 
   2  -1  -3  249.11    8.47 
   2  -1  -3  245.40    8.48 
   2  -1  -3  253.69    8.47 
   2  -1  -3  262.44    8.57 
  -2   1   3  249.85    8.48 
  -2   1   3  240.40    8.53 
  -2   1   3  224.92    8.51 
  -2   1   3  250.37    8.50 
  -2   1   3  244.41    8.47 
   1  -1  -3   74.58    2.60 
   1  -1  -3   74.71    2.60 
   1  -1  -3   76.86    2.62 
   1  -1  -3   78.45    2.60 
  -1   1   3   75.57    2.60 
  -1   1   3   77.86    2.60 
  -1   1   3   74.73    2.61 
  -1   1   3   71.31    2.62 
  -1   1   3   72.35    2.60 
   0  -1  -3   91.86    3.49 
   0  -1  -3  101.22    3.50 
   0  -1  -3  102.96    3.53 
   0  -1  -3  105.34    3.50 
   0  -1  -3  106.66    3.52 
   0   1   3  101.29    3.50 
   0   1   3   97.51    3.49 
   0   1   3   98.72    3.52 
   0   1   3  106.01    3.49 
   0   1   3  101.87    3.52 
  -1  -1  -3    5.81    0.22 
  -1  -1  -3    5.73    0.22 
  -1  -1  -3    5.54    0.25 
  -1  -1  -3    4.89    0.21 
  -1  -1  -3    5.87    0.24 
   1   1   3    5.75    0.21 
   1   1   3    5.30    0.22 
  -2  -1  -3    0.13    0.04 
  -2  -1  -3    0.22    0.05 
  -2  -1  -3    0.19    0.06 
  -2  -1  -3    0.20    0.04 
  -2  -1  -3    0.18    0.04 
   2   1   3    0.17    0.06 
   2   1   3    0.18    0.03 
   2   1   3    0.11    0.04 
   2   1   3    0.34    0.06 
  -3  -1  -3    0.21    0.04 
  -3  -1  -3    0.18    0.06 
  -3  -1  -3    0.21    0.04 
  -3  -1  -3    0.13    0.04 
   3   1   3    0.14    0.06 
   3   1   3    0.41    0.06 
   3   1   3    0.17    0.06 
   3   1   3    0.18    0.04 
  -4  -1  -3   15.74    0.58 
  -4  -1  -3   15.93    0.59 
  -4  -1  -3   16.08    0.58 
   4   1   3   15.70    0.61 
   4   1   3   15.12    0.62 
   4   1   3   15.18    0.57 
  -5  -1  -3   21.87    0.81 
  -5  -1  -3   22.75    0.80 
  -5  -1  -3   21.41    0.80 
   5   1   3   19.42    0.83 
   5   1   3   20.92    0.82 
   5   1   3   23.52    0.79 
  -6  -1  -3   41.17    1.50 
  -6  -1  -3   40.78    1.51 
  -6  -1  -3   40.08    1.50 
   6   1   3   44.78    1.55 
   6   1   3   42.25    1.53 
   6   1   3   42.98    1.49 
  -7  -1  -3    9.05    0.40 
   7   1   3    9.52    0.44 
   7   1   3    8.98    0.42 
  -8  -1  -3   55.06    1.90 
   8   1   3   54.65    1.92 
   8   1   3   48.00    1.93 
  -9  -1  -3    2.84    0.23 
   9   1   3    3.46    0.26 
   9   1   3    3.59    0.28 
 -10  -1  -3    1.14    0.18 
  10   1   3    1.36    0.22 
  10   1   3    1.30    0.22 
 -11  -1  -3    8.87    0.45 
  11   1   3    9.23    0.50 
  11   1   3    8.86    0.47 
 -12  -1  -3    0.07    0.11 
  12   1   3    0.29    0.15 
  12   1   3    0.41    0.17 
  15  -2  -3    0.14    0.07 
  15  -2  -3    0.35    0.17 
  14  -2  -3    3.35    0.31 
  14  -2  -3    3.48    0.21 
 -14   2   3    3.24    0.27 
  13  -2  -3   40.21    1.53 
  13  -2  -3   39.66    1.51 
  13  -2  -3   40.90    1.45 
 -13   2   3   40.58    1.51 
  12  -2  -3   27.80    1.03 
  12  -2  -3   27.90    1.08 
 -12   2   3   28.86    1.08 
  11  -2  -3    7.94    0.38 
  11  -2  -3    8.81    0.47 
  11  -2  -3    8.89    0.37 
 -11   2   3    9.17    0.41 
 -11   2   3    8.77    0.40 
  10  -2  -3    1.03    0.13 
  10  -2  -3    1.06    0.20 
  10  -2  -3    0.89    0.13 
  10  -2  -3    0.93    0.12 
 -10   2   3    1.01    0.14 
 -10   2   3    1.00    0.14 
   9  -2  -3    0.14    0.07 
   9  -2  -3    0.01    0.05 
   9  -2  -3    0.01    0.06 
   9  -2  -3    0.08    0.10 
  -9   2   3    0.07    0.06 
  -9   2   3    0.15    0.07 
   8  -2  -3    5.83    0.27 
   8  -2  -3    5.48    0.31 
   8  -2  -3    5.48    0.26 
  -8   2   3    5.50    0.26 
   7  -2  -3    2.26    0.19 
   7  -2  -3    2.18    0.15 
   7  -2  -3    2.32    0.15 
  -7   2   3    2.27    0.15 
  -7   2   3    2.08    0.14 
   6  -2  -3    7.35    0.34 
   6  -2  -3    7.28    0.31 
   6  -2  -3    7.40    0.31 
  -6   2   3    7.40    0.31 
  -6   2   3    7.39    0.31 
   5  -2  -3    6.04    0.26 
   5  -2  -3    6.21    0.29 
   5  -2  -3    6.29    0.27 
   5  -2  -3    6.17    0.26 
   5  -2  -3    6.06    0.26 
  -5   2   3    6.23    0.26 
  -5   2   3    6.23    0.26 
   4  -2  -3    3.42    0.16 
   4  -2  -3    3.36    0.19 
   4  -2  -3    3.29    0.16 
  -4   2   3    3.25    0.18 
  -4   2   3    3.90    0.17 
  -4   2   3    3.41    0.16 
   3  -2  -3    0.88    0.08 
   3  -2  -3    1.01    0.11 
   3  -2  -3    0.93    0.08 
   3  -2  -3    1.00    0.08 
  -3   2   3    0.91    0.08 
  -3   2   3    0.97    0.08 
  -3   2   3    0.98    0.07 
  -3   2   3    0.98    0.08 
  -3   2   3    0.95    0.08 
  -3   2   3    0.93    0.08 
  -3   2   3    1.44    0.11 
   2  -2  -3  190.15    6.45 
   2  -2  -3  198.09    6.45 
   2  -2  -3  195.38    6.46 
   2  -2  -3  165.00    6.46 
   2  -2  -3  186.44    6.45 
  -2   2   3  185.77    6.45 
  -2   2   3  190.34    6.47 
  -2   2   3  195.15    6.44 
  -2   2   3  190.94    6.45 
  -2   2   3  175.24    6.44 
  -2   2   3  188.90    6.46 
  -2   2   3  183.96    6.47 
   1  -2  -3    6.32    0.29 
   1  -2  -3    6.59    0.26 
   1  -2  -3    6.98    0.27 
   1  -2  -3    7.01    0.28 
  -1   2   3    7.07    0.26 
  -1   2   3    6.52    0.28 
  -1   2   3    6.26    0.25 
  -1   2   3    6.48    0.26 
  -1   2   3    6.72    0.28 
  -1   2   3    6.87    0.27 
   0  -2  -3    9.51    0.38 
   0  -2  -3   10.33    0.38 
   0  -2  -3   10.22    0.38 
   0  -2  -3   10.09    0.40 
   0  -2  -3   10.40    0.40 
   0   2   3    9.74    0.37 
   0   2   3   10.23    0.41 
   0   2   3    9.88    0.40 
   0   2   3    9.85    0.36 
   0   2   3    9.81    0.38 
   0   2   3    9.62    0.36 
   0   2   3   10.64    0.36 
  -1  -2  -3    1.06    0.12 
  -1  -2  -3    1.14    0.09 
  -1  -2  -3    1.10    0.08 
  -1  -2  -3    1.10    0.09 
  -1  -2  -3    0.98    0.10 
  -1  -2  -3    1.00    0.11 
   1   2   3    1.06    0.10 
   1   2   3    0.81    0.11 
   1   2   3    1.05    0.06 
   1   2   3    1.15    0.08 
   1   2   3    0.97    0.06 
   1   2   3    1.35    0.06 
  -2  -2  -3   76.14    2.60 
  -2  -2  -3   75.39    2.61 
  -2  -2  -3   73.97    2.59 
  -2  -2  -3   66.16    2.58 
  -2  -2  -3   67.24    2.60 
  -2  -2  -3   78.78    2.58 
   2   2   3   76.51    2.58 
   2   2   3   72.19    2.55 
   2   2   3   75.93    2.59 
   2   2   3   78.72    2.61 
  -3  -2  -3   52.99    1.75 
  -3  -2  -3   48.68    1.74 
  -3  -2  -3   49.92    1.75 
   3   2   3   47.87    1.71 
   3   2   3   51.66    1.76 
   3   2   3   50.27    1.74 
   3   2   3   50.60    1.75 
   3   2   3   43.91    1.77 
  -4  -2  -3    1.96    0.13 
  -4  -2  -3    2.09    0.14 
  -4  -2  -3    1.86    0.13 
   4   2   3    1.89    0.14 
   4   2   3    1.88    0.12 
   4   2   3    2.06    0.15 
   4   2   3    1.80    0.17 
  -5  -2  -3    5.97    0.30 
  -5  -2  -3    7.10    0.31 
  -5  -2  -3    7.58    0.32 
   5   2   3    7.00    0.33 
   5   2   3    6.77    0.32 
   5   2   3    7.00    0.35 
   5   2   3    6.99    0.29 
  -6  -2  -3  135.53    4.80 
  -6  -2  -3  137.72    4.80 
   6   2   3  141.03    4.80 
   6   2   3  125.10    4.83 
   6   2   3  141.95    4.81 
   6   2   3  143.83    4.78 
  -7  -2  -3   42.88    1.59 
   7   2   3   44.09    1.60 
   7   2   3   43.74    1.63 
  -8  -2  -3   27.50    1.07 
   8   2   3   29.21    1.12 
   8   2   3   27.63    1.08 
  -9  -2  -3    1.43    0.19 
   9   2   3    1.34    0.23 
   9   2   3    1.26    0.22 
 -10  -2  -3    0.39    0.12 
  10   2   3    0.49    0.15 
  10   2   3    0.20    0.13 
 -11  -2  -3    0.69    0.15 
  11   2   3    0.41    0.15 
  11   2   3    0.31    0.15 
  11   2   3    0.49    0.16 
 -12  -2  -3   12.63    0.61 
  12   2   3   12.93    0.63 
  12   2   3   13.01    0.63 
  15  -3  -3    3.72    0.20 
  15  -3  -3    3.44    0.33 
  14  -3  -3    7.73    0.34 
  14  -3  -3    8.07    0.45 
 -14   3   3    7.23    0.40 
  13  -3  -3    0.84    0.14 
  13  -3  -3    0.71    0.17 
 -13   3   3    0.54    0.12 
  12  -3  -3    2.97    0.22 
  12  -3  -3    2.95    0.29 
  12  -3  -3    3.17    0.20 
 -12   3   3    2.85    0.22 
  11  -3  -3    1.23    0.14 
  11  -3  -3    0.89    0.17 
 -11   3   3    1.30    0.16 
 -11   3   3    1.25    0.16 
  10  -3  -3    0.88    0.14 
  10  -3  -3    0.61    0.14 
  10  -3  -3    0.81    0.13 
 -10   3   3    0.85    0.14 
 -10   3   3    0.92    0.14 
   9  -3  -3   14.07    0.60 
   9  -3  -3   13.98    0.55 
  -9   3   3   13.20    0.55 
  -9   3   3   14.23    0.56 
   8  -3  -3    0.80    0.11 
   8  -3  -3    0.70    0.12 
   8  -3  -3    0.65    0.13 
  -8   3   3    0.75    0.11 
  -8   3   3    0.71    0.11 
   7  -3  -3   30.64    1.15 
   7  -3  -3   31.59    1.15 
   7  -3  -3   31.62    1.19 
   7  -3  -3   31.99    1.14 
  -7   3   3   32.17    1.15 
  -7   3   3   32.80    1.15 
   6  -3  -3   71.50    2.53 
   6  -3  -3   72.82    2.51 
   6  -3  -3   72.52    2.53 
   6  -3  -3   70.51    2.56 
  -6   3   3   72.72    2.53 
  -6   3   3   72.60    2.53 
   5  -3  -3   56.41    1.97 
   5  -3  -3   54.78    1.94 
   5  -3  -3   54.83    1.93 
  -5   3   3   55.49    1.94 
  -5   3   3   54.63    1.93 
  -5   3   3   55.75    1.94 
  -5   3   3   54.35    1.94 
   4  -3  -3   42.44    1.53 
   4  -3  -3   42.14    1.53 
   4  -3  -3   42.78    1.53 
   4  -3  -3   42.58    1.56 
  -4   3   3   43.95    1.53 
  -4   3   3   44.35    1.53 
  -4   3   3   44.94    1.56 
  -4   3   3   43.39    1.52 
  -4   3   3   43.32    1.54 
  -4   3   3   44.20    1.53 
   3  -3  -3   80.99    2.77 
   3  -3  -3   75.54    2.79 
  -3   3   3   80.49    2.76 
  -3   3   3   78.79    2.79 
  -3   3   3   79.58    2.77 
  -3   3   3   82.19    2.77 
  -3   3   3   79.78    2.77 
   2  -3  -3   86.16    2.99 
   2  -3  -3   88.05    2.99 
   2  -3  -3   85.58    2.99 
  -2   3   3   84.61    3.00 
  -2   3   3   84.34    2.99 
  -2   3   3   86.68    2.98 
  -2   3   3   79.21    2.98 
  -2   3   3   87.51    3.01 
  -2   3   3   92.05    2.99 
   1  -3  -3   34.42    1.27 
   1  -3  -3   35.65    1.25 
   1  -3  -3   36.99    1.25 
   1  -3  -3   34.66    1.26 
  -1   3   3   36.10    1.25 
  -1   3   3   38.10    1.28 
  -1   3   3   33.47    1.24 
  -1   3   3   36.08    1.26 
  -1   3   3   35.34    1.24 
  -1   3   3   32.23    1.24 
  -1   3   3   35.50    1.27 
   0  -3  -3  101.96    3.58 
   0  -3  -3  104.09    3.55 
   0  -3  -3   93.10    3.55 
   0  -3  -3  101.71    3.57 
   0  -3  -3  105.12    3.55 
   0   3   3  106.32    3.54 
   0   3   3  102.08    3.56 
   0   3   3   97.07    3.55 
   0   3   3  110.69    3.55 
   0   3   3   99.57    3.57 
   0   3   3  104.24    3.57 
  -1  -3  -3  120.89    4.10 
  -1  -3  -3  106.17    4.12 
  -1  -3  -3  119.83    4.10 
  -1  -3  -3  115.41    4.12 
  -1  -3  -3  123.37    4.10 
  -1  -3  -3  118.88    4.11 
   1   3   3  128.00    4.10 
   1   3   3  124.36    4.13 
   1   3   3  114.40    4.08 
   1   3   3  120.19    4.11 
   1   3   3  108.69    4.08 
  -2  -3  -3    1.49    0.12 
  -2  -3  -3    1.38    0.11 
  -2  -3  -3    1.38    0.14 
  -2  -3  -3    1.34    0.11 
   2   3   3    1.47    0.15 
   2   3   3    1.31    0.08 
   2   3   3    1.41    0.09 
   2   3   3    1.57    0.12 
   2   3   3    1.45    0.11 
  -3  -3  -3    5.93    0.30 
  -3  -3  -3    5.59    0.27 
  -3  -3  -3    5.24    0.26 
  -3  -3  -3    6.33    0.27 
   3   3   3    5.71    0.23 
   3   3   3    5.89    0.30 
   3   3   3    6.07    0.28 
   3   3   3    5.58    0.25 
   3   3   3    5.83    0.23 
  -4  -3  -3   39.33    1.40 
  -4  -3  -3   40.69    1.41 
  -4  -3  -3   40.13    1.41 
   4   3   3   38.78    1.39 
   4   3   3   39.84    1.45 
   4   3   3   38.26    1.41 
   4   3   3   39.67    1.42 
   4   3   3   35.09    1.36 
  -5  -3  -3   49.91    1.69 
  -5  -3  -3   40.60    1.67 
   5   3   3   47.04    1.66 
   5   3   3   45.84    1.62 
   5   3   3   47.13    1.72 
   5   3   3   48.31    1.69 
   5   3   3   48.24    1.69 
  -6  -3  -3   31.21    1.14 
   6   3   3   30.38    1.14 
   6   3   3   30.99    1.15 
   6   3   3   29.33    1.18 
  -7  -3  -3    9.44    0.43 
   7   3   3   10.04    0.48 
   7   3   3    8.90    0.44 
   7   3   3    8.99    0.44 
  -8  -3  -3   11.33    0.50 
   8   3   3   11.09    0.51 
   8   3   3   11.45    0.52 
   8   3   3   10.27    0.54 
  -9  -3  -3    2.40    0.23 
   9   3   3    2.52    0.27 
   9   3   3    2.58    0.26 
   9   3   3    2.46    0.25 
 -10  -3  -3    7.99    0.44 
  10   3   3    8.45    0.46 
  10   3   3    9.18    0.51 
  10   3   3    8.45    0.46 
 -11  -3  -3    3.14    0.28 
  11   3   3    2.83    0.30 
  11   3   3    3.33    0.32 
  15  -4  -3    6.99    0.44 
  14  -4  -3    2.04    0.27 
  14  -4  -3    2.18    0.16 
 -14   4   3    1.24    0.17 
  13  -4  -3   10.09    0.41 
  13  -4  -3    9.27    0.53 
  12  -4  -3   17.55    0.77 
  12  -4  -3   17.25    0.66 
  12  -4  -3   16.80    0.68 
  11  -4  -3   45.46    1.71 
  11  -4  -3   45.00    1.61 
  10  -4  -3    7.22    0.31 
  10  -4  -3    7.08    0.31 
  10  -4  -3    6.60    0.40 
  10  -4  -3    7.59    0.34 
 -10   4   3    6.77    0.34 
   9  -4  -3    4.53    0.30 
   9  -4  -3    4.43    0.21 
   9  -4  -3    4.63    0.24 
  -9   4   3    3.88    0.23 
  -9   4   3    4.35    0.24 
   8  -4  -3   32.78    1.16 
   8  -4  -3   31.36    1.20 
   8  -4  -3   30.85    1.13 
  -8   4   3   30.78    1.15 
  -8   4   3   32.19    1.16 
   7  -4  -3   16.50    0.63 
   7  -4  -3   17.34    0.69 
   7  -4  -3   17.63    0.65 
  -7   4   3   16.07    0.65 
  -7   4   3   16.82    0.64 
  -7   4   3   17.76    0.65 
   6  -4  -3   32.51    1.17 
   6  -4  -3   31.36    1.12 
   6  -4  -3   30.02    1.10 
  -6   4   3   31.66    1.12 
  -6   4   3   29.92    1.11 
  -6   4   3   30.55    1.13 
  -6   4   3   31.63    1.13 
   5  -4  -3   63.57    2.27 
   5  -4  -3   62.03    2.23 
   5  -4  -3   63.20    2.22 
  -5   4   3   62.62    2.22 
  -5   4   3   63.48    2.22 
  -5   4   3   67.45    2.24 
  -5   4   3   62.80    2.24 
  -5   4   3   63.15    2.23 
   4  -4  -3    0.05    0.04 
   4  -4  -3    0.15    0.08 
   4  -4  -3   -0.05    0.05 
  -4   4   3   -0.01    0.05 
  -4   4   3   -0.01    0.04 
  -4   4   3   -0.01    0.05 
  -4   4   3    0.09    0.04 
  -4   4   3    0.00    0.04 
   3  -4  -3  327.82   11.03 
   3  -4  -3  311.33   11.05 
  -3   4   3  312.68   11.03 
  -3   4   3  318.97   11.03 
  -3   4   3  313.19   11.03 
  -3   4   3  353.90   11.07 
  -3   4   3  304.15   11.05 
   2  -4  -3  379.02   13.36 
   2  -4  -3  368.90   13.37 
   2  -4  -3  382.26   13.35 
  -2   4   3  384.67   13.36 
  -2   4   3  426.59   13.52 
  -2   4   3  398.09   13.49 
  -2   4   3  382.61   13.36 
  -2   4   3  388.25   13.44 
  -2   4   3  393.07   13.38 
  -2   4   3  378.70   13.35 
   1  -4  -3    0.99    0.13 
   1  -4  -3    0.84    0.10 
   1  -4  -3    0.71    0.10 
   1  -4  -3    0.84    0.09 
  -1   4   3    0.69    0.11 
  -1   4   3    0.76    0.09 
  -1   4   3    0.91    0.10 
  -1   4   3    0.82    0.09 
  -1   4   3    0.92    0.11 
  -1   4   3    0.86    0.08 
   0  -4  -3   15.58    0.63 
   0  -4  -3   17.20    0.62 
   0  -4  -3   16.37    0.61 
   0   4   3   15.65    0.60 
   0   4   3   16.49    0.63 
   0   4   3   15.99    0.62 
   0   4   3   16.52    0.61 
  -1  -4  -3    2.69    0.18 
  -1  -4  -3    2.42    0.16 
  -1  -4  -3    2.85    0.16 
  -1  -4  -3    2.82    0.16 
   1   4   3    2.44    0.15 
   1   4   3    2.55    0.14 
   1   4   3    2.48    0.17 
   1   4   3    2.87    0.14 
   1   4   3    2.83    0.19 
  -2  -4  -3   10.92    0.47 
  -2  -4  -3   11.71    0.48 
  -2  -4  -3   12.29    0.47 
  -2  -4  -3   12.31    0.50 
   2   4   3   11.61    0.45 
   2   4   3   12.31    0.48 
   2   4   3   11.85    0.46 
   2   4   3   11.49    0.44 
   2   4   3   12.27    0.51 
  -3  -4  -3    1.41    0.13 
  -3  -4  -3    1.02    0.15 
  -3  -4  -3    1.25    0.14 
   3   4   3    1.34    0.10 
   3   4   3    1.00    0.15 
   3   4   3    1.29    0.10 
   3   4   3    1.23    0.12 
   3   4   3    1.15    0.14 
  -4  -4  -3   87.51    2.98 
  -4  -4  -3   81.95    2.98 
  -4  -4  -3   80.56    3.00 
   4   4   3   78.43    2.93 
   4   4   3   88.10    3.02 
   4   4   3   84.20    2.98 
   4   4   3   83.98    2.93 
   4   4   3   91.21    2.97 
  -5  -4  -3   58.95    2.14 
  -5  -4  -3   59.15    2.11 
   5   4   3   60.26    2.16 
   5   4   3   57.24    2.05 
   5   4   3   60.97    2.12 
   5   4   3   56.74    2.05 
  -6  -4  -3   12.67    0.57 
  -6  -4  -3   11.97    0.54 
   6   4   3   12.38    0.54 
   6   4   3   12.76    0.55 
   6   4   3   12.70    0.46 
   6   4   3   13.39    0.59 
  -7  -4  -3    5.65    0.32 
   7   4   3    5.69    0.33 
   7   4   3    5.42    0.36 
   7   4   3    5.70    0.33 
  -8  -4  -3    7.68    0.41 
   8   4   3    7.76    0.42 
   8   4   3    7.76    0.42 
   8   4   3    8.12    0.46 
  -9  -4  -3    0.24    0.12 
   9   4   3    0.20    0.13 
   9   4   3    0.20    0.14 
   9   4   3    0.27    0.14 
 -10  -4  -3    1.51    0.23 
  10   4   3    1.39    0.21 
  10   4   3    2.02    0.27 
  15  -5  -3    0.33    0.17 
  14  -5  -3   26.91    1.16 
  14  -5  -3   28.46    1.01 
  13  -5  -3   27.10    0.99 
  13  -5  -3   27.48    1.13 
  12  -5  -3   13.50    0.52 
  12  -5  -3   12.56    0.63 
  11  -5  -3    0.90    0.13 
  11  -5  -3    0.71    0.16 
  10  -5  -3    1.52    0.23 
  10  -5  -3    1.37    0.17 
 -10   5   3    1.78    0.17 
   9  -5  -3    7.52    0.41 
   9  -5  -3    7.44    0.31 
   9  -5  -3    8.02    0.35 
  -9   5   3    7.34    0.35 
   8  -5  -3   39.96    1.41 
   8  -5  -3   40.83    1.44 
   8  -5  -3   40.02    1.49 
  -8   5   3   39.94    1.45 
  -8   5   3   39.13    1.43 
  -8   5   3   39.73    1.44 
   7  -5  -3   29.93    1.08 
   7  -5  -3   31.68    1.16 
   7  -5  -3   31.35    1.11 
  -7   5   3   30.31    1.11 
  -7   5   3   29.45    1.09 
  -7   5   3   30.23    1.11 
  -7   5   3   29.76    1.12 
   6  -5  -3    9.86    0.38 
   6  -5  -3    9.08    0.44 
   6  -5  -3    9.65    0.40 
  -6   5   3   10.25    0.41 
  -6   5   3   10.09    0.41 
  -6   5   3   10.12    0.41 
  -6   5   3    9.82    0.39 
   5  -5  -3   16.78    0.65 
   5  -5  -3   17.79    0.69 
   5  -5  -3   17.50    0.63 
  -5   5   3   16.89    0.63 
  -5   5   3   17.01    0.64 
  -5   5   3   17.05    0.65 
  -5   5   3   17.24    0.65 
  -5   5   3   16.99    0.65 
   4  -5  -3    0.34    0.06 
   4  -5  -3    0.06    0.06 
   4  -5  -3    0.17    0.08 
  -4   5   3    0.07    0.06 
  -4   5   3    0.17    0.06 
  -4   5   3    0.07    0.05 
  -4   5   3    0.20    0.06 
  -4   5   3    0.10    0.05 
   3  -5  -3   26.66    0.97 
   3  -5  -3   27.36    1.00 
  -3   5   3   26.68    0.97 
  -3   5   3   26.66    0.96 
  -3   5   3   26.44    0.98 
  -3   5   3   26.70    0.97 
  -3   5   3   26.56    0.98 
   2  -5  -3  286.11   10.09 
   2  -5  -3  303.49   10.08 
   2  -5  -3  286.60   10.07 
  -2   5   3  300.97   10.08 
  -2   5   3  257.76   10.07 
  -2   5   3  305.03   10.07 
  -2   5   3  302.37   10.08 
  -2   5   3  294.97   10.06 
   1  -5  -3   88.41    3.32 
  -1   5   3   96.92    3.31 
  -1   5   3   97.81    3.33 
  -1   5   3   98.99    3.32 
  -1   5   3  105.19    3.29 
  -1   5   3   81.41    3.30 
   0  -5  -3   32.61    1.24 
   0  -5  -3   30.61    1.22 
   0   5   3   33.20    1.22 
   0   5   3   36.25    1.25 
   0   5   3   35.08    1.21 
   0   5   3   35.00    1.24 
   0   5   3   34.73    1.23 
  -1  -5  -3    0.55    0.10 
  -1  -5  -3    0.32    0.07 
   1   5   3    0.30    0.06 
   1   5   3    0.43    0.08 
   1   5   3    0.52    0.10 
   1   5   3    0.49    0.07 
   1   5   3    0.40    0.07 
  -2  -5  -3   54.53    1.94 
  -2  -5  -3   51.59    1.95 
  -2  -5  -3   51.96    1.94 
   2   5   3   55.35    1.95 
   2   5   3   55.68    1.98 
   2   5   3   56.31    1.91 
   2   5   3   53.64    1.92 
   2   5   3   55.71    1.93 
  -3  -5  -3    3.20    0.21 
  -3  -5  -3    3.18    0.23 
  -3  -5  -3    3.53    0.22 
   3   5   3    3.32    0.23 
   3   5   3    3.51    0.18 
   3   5   3    3.29    0.17 
   3   5   3    2.96    0.24 
   3   5   3    2.77    0.19 
  -4  -5  -3   13.17    0.54 
  -4  -5  -3   12.80    0.56 
   4   5   3   11.85    0.48 
   4   5   3   12.19    0.57 
   4   5   3   12.45    0.49 
   4   5   3   13.80    0.55 
  -5  -5  -3   12.47    0.55 
  -5  -5  -3   12.36    0.53 
   5   5   3   11.38    0.46 
   5   5   3   12.69    0.46 
   5   5   3   11.09    0.56 
   5   5   3   11.91    0.54 
  -6  -5  -3    3.95    0.29 
  -6  -5  -3    3.91    0.26 
   6   5   3    4.17    0.29 
   6   5   3    4.07    0.19 
   6   5   3    3.82    0.31 
  -7  -5  -3    0.08    0.12 
  -7  -5  -3    0.14    0.10 
   7   5   3    0.19    0.12 
   7   5   3   -0.02    0.12 
  -8  -5  -3   11.59    0.59 
  -8  -5  -3   11.92    0.56 
   8   5   3   11.66    0.57 
   8   5   3   13.00    0.62 
  -9  -5  -3    4.84    0.37 
  -9  -5  -3    4.80    0.34 
   9   5   3    5.13    0.38 
  10   5   3    3.17    0.34 
  14  -6  -3    3.18    0.34 
  14  -6  -3    3.02    0.17 
 -14   6   3    2.66    0.24 
  13  -6  -3    1.15    0.21 
  13  -6  -3    1.22    0.13 
 -13   6   3    0.79    0.13 
  12  -6  -3    2.81    0.31 
  12  -6  -3    3.23    0.19 
 -12   6   3    2.44    0.21 
  11  -6  -3    9.47    0.49 
  11  -6  -3    8.64    0.37 
  10  -6  -3   30.50    1.20 
  10  -6  -3   32.33    1.18 
 -10   6   3   28.85    1.14 
   9  -6  -3    1.01    0.16 
   9  -6  -3    0.89    0.10 
   9  -6  -3    0.97    0.17 
  -9   6   3    0.97    0.14 
  -9   6   3    1.13    0.14 
   8  -6  -3    0.92    0.14 
   8  -6  -3    0.68    0.09 
   8  -6  -3    0.78    0.15 
  -8   6   3    0.76    0.11 
  -8   6   3    0.79    0.12 
  -8   6   3    0.90    0.13 
  -8   6   3    0.59    0.10 
   7  -6  -3    0.62    0.13 
   7  -6  -3    0.72    0.10 
   7  -6  -3    0.70    0.09 
  -7   6   3    1.10    0.13 
  -7   6   3    0.68    0.10 
  -7   6   3    0.79    0.11 
  -7   6   3    1.15    0.13 
   6  -6  -3    1.32    0.11 
   6  -6  -3    1.10    0.17 
   6  -6  -3    1.17    0.14 
  -6   6   3    1.14    0.10 
  -6   6   3    1.31    0.13 
  -6   6   3    1.21    0.13 
  -6   6   3    0.96    0.14 
  -6   6   3    1.21    0.12 
   5  -6  -3   10.29    0.46 
   5  -6  -3   10.39    0.43 
   5  -6  -3   10.02    0.41 
  -5   6   3   10.10    0.41 
  -5   6   3    9.89    0.43 
  -5   6   3   11.13    0.43 
  -5   6   3   10.64    0.43 
  -5   6   3   10.15    0.41 
   4  -6  -3   23.33    0.86 
   4  -6  -3   23.49    0.89 
   4  -6  -3   22.02    0.85 
  -4   6   3   23.34    0.87 
  -4   6   3   22.88    0.85 
  -4   6   3   22.94    0.86 
  -4   6   3   24.31    0.87 
  -4   6   3   22.78    0.85 
   3  -6  -3   34.42    1.29 
   3  -6  -3   35.49    1.27 
  -3   6   3   36.82    1.28 
  -3   6   3   35.35    1.27 
  -3   6   3   35.93    1.27 
  -3   6   3   35.44    1.25 
  -3   6   3   31.85    1.26 
   2  -6  -3   16.02    0.61 
   2  -6  -3   13.76    0.58 
  -2   6   3   15.10    0.58 
  -2   6   3   15.10    0.58 
  -2   6   3   14.66    0.59 
  -2   6   3   14.98    0.57 
  -2   6   3   15.08    0.59 
   1  -6  -3    0.94    0.13 
   1  -6  -3    0.71    0.13 
  -1   6   3    0.82    0.12 
  -1   6   3    0.46    0.09 
  -1   6   3    0.98    0.11 
  -1   6   3    0.64    0.10 
  -1   6   3    0.73    0.11 
   0  -6  -3   41.52    1.51 
   0   6   3   39.97    1.49 
   0   6   3   41.44    1.49 
   0   6   3   40.95    1.52 
   0   6   3   41.60    1.50 
   0   6   3   42.79    1.47 
  -1  -6  -3    1.42    0.16 
   1   6   3    1.45    0.17 
   1   6   3    1.44    0.14 
   1   6   3    1.36    0.18 
   1   6   3    1.50    0.13 
   1   6   3    1.27    0.13 
  -2  -6  -3   28.45    1.08 
   2   6   3   28.22    1.05 
   2   6   3   28.75    1.10 
   2   6   3   28.79    1.07 
   2   6   3   27.95    1.03 
   2   6   3   27.82    1.04 
  -3  -6  -3   14.27    0.63 
  -3  -6  -3   15.59    0.65 
   3   6   3   16.97    0.70 
   3   6   3   16.20    0.60 
   3   6   3   16.73    0.69 
   3   6   3   15.92    0.65 
   3   6   3   14.95    0.61 
  -4  -6  -3    4.09    0.27 
  -4  -6  -3    4.25    0.26 
   4   6   3    3.35    0.20 
   4   6   3    3.73    0.27 
   4   6   3    4.04    0.30 
   4   6   3    3.85    0.21 
  -5  -6  -3   33.67    1.24 
  -5  -6  -3   33.16    1.26 
   5   6   3   33.08    1.25 
   5   6   3   34.27    1.29 
   5   6   3   31.37    1.18 
   5   6   3   30.86    1.17 
  -6  -6  -3   36.67    1.41 
  -6  -6  -3   37.69    1.39 
   6   6   3   35.31    1.44 
   6   6   3   37.07    1.40 
   6   6   3   37.11    1.31 
  -7  -6  -3    6.26    0.40 
  -7  -6  -3    6.36    0.37 
   7   6   3    6.56    0.41 
   7   6   3    6.52    0.43 
  -8  -6  -3   13.04    0.61 
  -8  -6  -3   12.85    0.63 
   8   6   3   12.89    0.63 
   9   6   3    0.34    0.18 
  15  -7  -3    3.10    0.40 
  14  -7  -3    0.34    0.18 
 -14   7   3    0.40    0.13 
  13  -7  -3    0.20    0.07 
  13  -7  -3   -0.05    0.15 
 -13   7   3    0.22    0.11 
  12  -7  -3   36.29    1.36 
  12  -7  -3   33.90    1.21 
 -12   7   3   31.30    1.27 
 -11   7   3    2.36    0.19 
  10  -7  -3    0.05    0.13 
 -10   7   3    0.03    0.07 
 -10   7   3    0.03    0.03 
   9  -7  -3    5.16    0.28 
   9  -7  -3    5.19    0.34 
  -9   7   3    4.58    0.26 
  -9   7   3    5.17    0.28 
   8  -7  -3    1.29    0.11 
   8  -7  -3    1.24    0.16 
   8  -7  -3    1.65    0.22 
  -8   7   3    1.23    0.17 
  -8   7   3    1.26    0.15 
  -8   7   3    1.67    0.15 
  -8   7   3    1.25    0.15 
   7  -7  -3    1.10    0.11 
   7  -7  -3    1.18    0.17 
   7  -7  -3    1.23    0.15 
  -7   7   3    1.31    0.15 
  -7   7   3    1.23    0.13 
  -7   7   3    1.24    0.14 
  -7   7   3    1.13    0.15 
   6  -7  -3   28.43    1.13 
   6  -7  -3   29.79    1.09 
   6  -7  -3   28.18    1.06 
  -6   7   3   28.81    1.09 
  -6   7   3   29.95    1.08 
  -6   7   3   30.54    1.09 
  -6   7   3   29.74    1.06 
  -6   7   3   29.76    1.09 
   5  -7  -3   39.30    1.44 
   5  -7  -3   43.95    1.49 
   5  -7  -3   39.81    1.43 
  -5   7   3   39.47    1.43 
  -5   7   3   38.79    1.45 
  -5   7   3   39.10    1.45 
  -5   7   3   40.63    1.45 
  -5   7   3   38.90    1.43 
   4  -7  -3    0.98    0.12 
   4  -7  -3    0.91    0.14 
   4  -7  -3    0.93    0.17 
  -4   7   3    0.88    0.12 
  -4   7   3    0.98    0.12 
  -4   7   3    1.02    0.13 
  -4   7   3    0.81    0.13 
  -4   7   3    1.20    0.14 
   3  -7  -3   42.09    1.67 
   3  -7  -3   46.98    1.65 
  -3   7   3   46.08    1.63 
  -3   7   3   44.92    1.65 
  -3   7   3   46.35    1.66 
  -3   7   3   46.35    1.65 
  -3   7   3   47.61    1.65 
   2  -7  -3   12.12    0.49 
   2  -7  -3   12.01    0.51 
  -2   7   3   11.45    0.50 
  -2   7   3   11.94    0.48 
  -2   7   3   10.84    0.46 
  -2   7   3   12.14    0.49 
   1  -7  -3    3.44    0.22 
   1  -7  -3    3.44    0.23 
  -1   7   3    3.66    0.21 
  -1   7   3    3.37    0.23 
  -1   7   3    3.94    0.20 
  -1   7   3    3.65    0.23 
   0  -7  -3    4.52    0.26 
   0  -7  -3    4.59    0.27 
   0   7   3    4.63    0.24 
   0   7   3    4.41    0.28 
   0   7   3    4.36    0.25 
   0   7   3    4.52    0.23 
   0   7   3    4.43    0.27 
  -1  -7  -3   19.11    0.75 
  -1  -7  -3   19.39    0.76 
   1   7   3   17.21    0.71 
   1   7   3   19.24    0.75 
   1   7   3   19.65    0.77 
   1   7   3   19.24    0.78 
   1   7   3   19.71    0.74 
  -2  -7  -3    6.87    0.36 
  -2  -7  -3    6.94    0.35 
   2   7   3    6.67    0.32 
   2   7   3    7.06    0.36 
   2   7   3    6.31    0.37 
   2   7   3    7.04    0.31 
  -3  -7  -3   19.85    0.78 
  -3  -7  -3   19.59    0.77 
   3   7   3   18.08    0.72 
   3   7   3   17.95    0.73 
   3   7   3   19.39    0.81 
   3   7   3   20.27    0.78 
  -4  -7  -3   11.67    0.55 
   4   7   3   12.68    0.59 
   4   7   3   11.65    0.55 
   4   7   3   12.07    0.48 
  -5  -7  -3    4.21    0.31 
   5   7   3    4.78    0.33 
   5   7   3    4.95    0.35 
   5   7   3    4.60    0.23 
  -6  -7  -3    1.29    0.18 
  -6  -7  -3    1.93    0.25 
   6   7   3    2.11    0.27 
   6   7   3    2.18    0.15 
   6   7   3    1.76    0.27 
   7   7   3    1.82    0.28 
   8   7   3    0.06    0.15 
 -15   8   3   11.39    0.73 
  14  -8  -3    2.76    0.34 
 -14   8   3    2.50    0.26 
  13  -8  -3    2.68    0.32 
  13  -8  -3    2.47    0.15 
 -13   8   3    2.57    0.25 
  12  -8  -3   10.94    0.43 
  12  -8  -3    9.87    0.57 
 -12   8   3   10.87    0.50 
  11  -8  -3    0.67    0.18 
 -11   8   3    1.14    0.17 
 -11   8   3    0.51    0.10 
  10  -8  -3    0.60    0.18 
 -10   8   3    0.73    0.11 
   9  -8  -3    3.17    0.29 
  -9   8   3    3.09    0.25 
  -9   8   3    3.13    0.21 
  -9   8   3    2.93    0.23 
   8  -8  -3    6.13    0.37 
   8  -8  -3    6.67    0.32 
  -8   8   3    6.20    0.33 
  -8   8   3    6.68    0.33 
  -8   8   3    6.22    0.32 
  -8   8   3    6.05    0.30 
   7  -8  -3    0.41    0.08 
   7  -8  -3    0.34    0.13 
   7  -8  -3    0.26    0.09 
  -7   8   3    0.35    0.10 
  -7   8   3    0.41    0.09 
  -7   8   3    0.39    0.07 
  -7   8   3    0.52    0.09 
  -7   8   3    0.37    0.10 
   6  -8  -3   12.55    0.50 
   6  -8  -3   13.06    0.53 
   6  -8  -3   12.35    0.57 
  -6   8   3   12.69    0.53 
  -6   8   3   13.82    0.54 
  -6   8   3   13.31    0.52 
  -6   8   3   12.31    0.54 
  -6   8   3   12.31    0.50 
   5  -8  -3    4.02    0.25 
   5  -8  -3    4.62    0.29 
  -5   8   3    4.38    0.24 
  -5   8   3    4.59    0.26 
  -5   8   3    4.40    0.25 
  -5   8   3    4.33    0.24 
  -5   8   3    4.21    0.25 
   4  -8  -3   48.14    1.69 
   4  -8  -3   39.57    1.70 
  -4   8   3   48.61    1.67 
  -4   8   3   48.34    1.69 
  -4   8   3   49.14    1.70 
  -4   8   3   46.50    1.69 
   3  -8  -3   34.63    1.16 
   3  -8  -3   30.54    1.12 
  -3   8   3   26.51    1.11 
  -3   8   3   30.46    1.12 
  -3   8   3   30.11    1.13 
  -3   8   3   28.46    1.10 
  -3   8   3   29.59    1.12 
   2  -8  -3   30.93    1.19 
   2  -8  -3   34.36    1.22 
  -2   8   3   32.75    1.17 
  -2   8   3   31.96    1.21 
  -2   8   3   30.65    1.20 
  -2   8   3   31.61    1.19 
  -2   8   3   32.46    1.19 
   1  -8  -3    7.76    0.39 
   1  -8  -3    7.84    0.38 
  -1   8   3    8.35    0.36 
  -1   8   3    7.72    0.39 
  -1   8   3    8.12    0.37 
  -1   8   3    8.00    0.40 
  -1   8   3    8.07    0.38 
   0  -8  -3    9.52    0.44 
   0  -8  -3    9.90    0.45 
   0   8   3   10.14    0.41 
   0   8   3    9.71    0.43 
   0   8   3    8.93    0.45 
   0   8   3    9.07    0.42 
   0   8   3    9.70    0.46 
  -1  -8  -3   30.04    1.09 
  -1  -8  -3   28.98    1.08 
   1   8   3   27.11    1.11 
   1   8   3   26.76    1.04 
   1   8   3   28.65    1.09 
  -2  -8  -3   10.91    0.49 
  -2  -8  -3   11.15    0.50 
   2   8   3   11.06    0.45 
   2   8   3    9.84    0.52 
   2   8   3   10.50    0.50 
  -3  -8  -3    0.85    0.14 
  -3  -8  -3    1.10    0.20 
   3   8   3    0.81    0.16 
   3   8   3    0.73    0.14 
   3   8   3    1.00    0.14 
  -4  -8  -3    0.75    0.14 
  -4  -8  -3    1.20    0.20 
   4   8   3    0.96    0.16 
   4   8   3    0.76    0.17 
   4   8   3    1.12    0.14 
  -5  -8  -3    4.51    0.37 
   5   8   3    5.07    0.37 
   5   8   3    4.63    0.34 
   5   8   3    4.67    0.24 
   6   8   3    3.13    0.33 
   6   8   3    3.31    0.19 
   7   8   3   45.25    1.74 
  14  -9  -3    3.72    0.38 
 -14   9   3    3.44    0.30 
  13  -9  -3    7.76    0.52 
 -13   9   3    9.05    0.45 
  12  -9  -3   -0.02    0.15 
  12  -9  -3    0.00    0.06 
 -12   9   3   -0.08    0.09 
 -12   9   3   -0.09    0.09 
  11  -9  -3   15.80    0.75 
 -11   9   3   16.51    0.66 
  10  -9  -3   30.60    1.22 
 -10   9   3   29.95    1.13 
   9  -9  -3    5.96    0.39 
  -9   9   3    6.49    0.32 
   8  -9  -3   25.77    1.08 
  -8   9   3   27.35    1.02 
  -8   9   3   27.34    1.08 
  -8   9   3   27.93    1.04 
   7  -9  -3    4.81    0.33 
  -7   9   3    5.30    0.29 
  -7   9   3    4.84    0.27 
  -7   9   3    4.54    0.29 
  -7   9   3    5.01    0.28 
  -7   9   3    4.83    0.24 
   6  -9  -3    0.14    0.12 
   6  -9  -3    0.02    0.08 
  -6   9   3    0.12    0.09 
  -6   9   3   -0.04    0.07 
  -6   9   3    0.06    0.08 
  -6   9   3    0.13    0.08 
  -6   9   3    0.16    0.08 
   5  -9  -3   23.54    0.92 
   5  -9  -3   26.58    0.96 
  -5   9   3   24.38    0.92 
  -5   9   3   22.06    0.92 
  -5   9   3   23.09    0.90 
  -5   9   3   22.82    0.90 
  -5   9   3   25.23    0.93 
   4  -9  -3   42.85    1.53 
   4  -9  -3   40.71    1.49 
  -4   9   3   40.88    1.50 
  -4   9   3   41.36    1.51 
  -4   9   3   39.54    1.49 
  -4   9   3   39.89    1.48 
  -4   9   3   40.02    1.50 
   3  -9  -3   20.06    0.81 
   3  -9  -3   22.27    0.85 
  -3   9   3   20.98    0.82 
  -3   9   3   20.87    0.83 
  -3   9   3   20.80    0.80 
  -3   9   3   20.57    0.82 
  -3   9   3   20.22    0.82 
   2  -9  -3    0.64    0.13 
   2  -9  -3    0.60    0.11 
  -2   9   3    0.51    0.09 
  -2   9   3    0.69    0.11 
  -2   9   3    0.57    0.12 
  -2   9   3    0.19    0.11 
  -2   9   3    0.52    0.11 
   1  -9  -3    1.70    0.20 
   1  -9  -3    1.65    0.20 
  -1   9   3    1.50    0.21 
  -1   9   3    1.60    0.17 
  -1   9   3    1.44    0.21 
  -1   9   3    1.93    0.19 
   0  -9  -3    3.83    0.26 
   0  -9  -3    3.74    0.26 
   0   9   3    3.45    0.27 
   0   9   3    3.30    0.27 
   0   9   3    3.63    0.23 
  -1  -9  -3   19.96    0.81 
  -1  -9  -3   21.84    0.82 
   1   9   3   20.97    0.83 
   1   9   3   19.73    0.85 
   1   9   3   18.51    0.77 
  -2  -9  -3   18.31    0.75 
  -2  -9  -3   16.10    0.74 
   2   9   3   19.68    0.71 
   2   9   3   17.47    0.79 
   2   9   3   18.10    0.76 
   3   9   3    4.71    0.35 
   3   9   3    4.61    0.33 
   3   9   3    4.17    0.25 
   4   9   3    0.46    0.16 
   4   9   3    0.59    0.15 
   4   9   3    0.45    0.09 
   5   9   3    7.90    0.35 
   5   9   3    7.96    0.47 
  14 -10  -3    1.99    0.33 
 -14  10   3    1.93    0.32 
  13 -10  -3    3.67    0.38 
 -13  10   3    3.72    0.32 
  12 -10  -3    4.38    0.38 
  12 -10  -3    4.35    0.20 
 -12  10   3    4.59    0.29 
 -12  10   3    3.00    0.27 
  11 -10  -3    6.25    0.44 
 -11  10   3    6.11    0.34 
  10 -10  -3   12.32    0.62 
 -10  10   3   12.79    0.55 
   9 -10  -3   13.05    0.63 
  -9  10   3   13.43    0.55 
  -9  10   3   11.90    0.56 
   8 -10  -3    6.30    0.38 
  -8  10   3    6.04    0.34 
  -8  10   3    6.06    0.32 
   7 -10  -3    1.46    0.23 
  -7  10   3    1.56    0.20 
  -7  10   3    1.50    0.18 
   6 -10  -3   26.83    1.05 
  -6  10   3   25.29    1.01 
  -6  10   3   26.33    0.99 
  -6  10   3   25.42    0.98 
  -6  10   3   25.20    1.00 
  -6  10   3   27.33    1.11 
   5 -10  -3   12.61    0.56 
  -5  10   3   11.45    0.51 
  -5  10   3   11.92    0.51 
  -5  10   3   11.00    0.53 
  -5  10   3   12.79    0.53 
  -5  10   3   11.78    0.53 
   4 -10  -3    0.54    0.14 
  -4  10   3    0.54    0.12 
  -4  10   3    0.58    0.12 
  -4  10   3    0.37    0.10 
  -4  10   3    0.49    0.13 
   3 -10  -3    0.17    0.11 
  -3  10   3    0.11    0.10 
  -3  10   3    0.03    0.08 
  -3  10   3   -0.03    0.10 
  -3  10   3    0.31    0.11 
   2 -10  -3    7.66    0.41 
  -2  10   3    8.38    0.55 
  -2  10   3    8.66    0.38 
  -2  10   3    8.05    0.43 
  -2  10   3    8.34    0.43 
   1 -10  -3   26.42    0.98 
  -1  10   3   24.21    0.99 
  -1  10   3   24.20    0.93 
  -1  10   3   23.60    0.98 
   0 -10  -3    4.19    0.28 
   0  10   3    4.04    0.30 
   0  10   3    4.00    0.25 
   0  10   3    3.70    0.29 
   1  10   3    1.27    0.23 
   1  10   3    1.47    0.19 
   1  10   3    1.54    0.18 
   2  10   3    4.24    0.35 
   2  10   3    5.07    0.27 
   2  10   3    4.75    0.41 
   3  10   3   12.08    0.69 
   3  10   3   13.70    0.54 
   4  10   3   -0.04    0.08 
  13 -11  -3   24.01    1.08 
 -13  11   3   24.35    0.97 
  12 -11  -3   10.54    0.61 
 -12  11   3   10.75    0.51 
  11 -11  -3    5.29    0.41 
 -11  11   3    5.48    0.33 
  10 -11  -3    0.13    0.15 
 -10  11   3    0.17    0.10 
 -10  11   3    0.17    0.10 
   9 -11  -3    9.78    0.53 
  -9  11   3    9.56    0.48 
  -9  11   3    9.57    0.45 
   8 -11  -3    0.29    0.14 
  -8  11   3    0.46    0.11 
  -8  11   3    0.37    0.12 
   7 -11  -3    3.30    0.28 
  -7  11   3    2.75    0.23 
  -7  11   3    3.05    0.26 
   6 -11  -3    4.07    0.32 
  -6  11   3    3.89    0.26 
  -6  11   3    3.96    0.28 
   5 -11  -3    0.16    0.13 
  -5  11   3    0.06    0.09 
  -5  11   3   -0.06    0.09 
  -5  11   3   -0.06    0.08 
   4 -11  -3    1.76    0.23 
  -4  11   3    2.02    0.20 
  -4  11   3    2.01    0.21 
   3 -11  -3   26.47    1.11 
  -3  11   3   29.79    1.13 
  -3  11   3   29.88    1.09 
   2 -11  -3   19.57    0.85 
  -2  11   3   21.09    0.87 
  -2  11   3   22.12    0.82 
  -1  11   3    0.05    0.11 
  -1  11   3    0.01    0.09 
   0  11   3    1.46    0.19 
   0  11   3    1.01    0.17 
   1  11   3    0.07    0.13 
   1  11   3    0.06    0.09 
   2  11   3    3.32    0.24 
   3  11   3   -0.02    0.09 
  13 -12  -3    2.63    0.48 
 -13  12   3    3.14    0.29 
  12 -12  -3    2.19    0.35 
 -12  12   3    2.71    0.27 
  11 -12  -3    0.16    0.18 
 -11  12   3    0.39    0.12 
  10 -12  -3    1.90    0.31 
 -10  12   3    1.84    0.25 
 -10  12   3    2.05    0.23 
   9 -12  -3    0.53    0.18 
  -9  12   3    0.71    0.13 
  -9  12   3    0.82    0.16 
   8 -12  -3    2.82    0.30 
  -8  12   3    2.46    0.24 
  -8  12   3    2.24    0.27 
   7 -12  -3    1.11    0.20 
  -7  12   3    1.18    0.20 
   6 -12  -3    4.63    0.35 
  -6  12   3    4.64    0.29 
   5 -12  -3    4.48    0.33 
  -5  12   3    4.34    0.29 
   4 -12  -3    2.45    0.29 
  -4  12   3    2.45    0.23 
  -4  12   3    2.40    0.24 
  -3  12   3    1.30    0.24 
  -3  12   3    1.68    0.20 
  -2  12   3    0.58    0.15 
  -2  12   3    0.83    0.13 
  -1  12   3    0.06    0.10 
  -1  12   3   -0.07    0.12 
   0  12   3   -0.03    0.09 
   0  12   3    0.02    0.13 
   1  12   3    8.05    0.40 
  11 -13  -3    9.58    0.57 
 -11  13   3   10.06    0.49 
  10 -13  -3    1.89    0.32 
 -10  13   3    1.66    0.24 
   9 -13  -3    0.38    0.18 
  -9  13   3    0.51    0.13 
   8 -13  -3    0.87    0.20 
  -8  13   3    0.54    0.13 
   7 -13  -3    0.68    0.18 
  -7  13   3    0.30    0.12 
  -6  13   3    0.74    0.14 
  -5  13   3    2.74    0.25 
  -4  13   3    1.07    0.16 
  -3  13   3    0.74    0.14 
  -2  13   3    7.36    0.44 
  -2  13   3    6.77    0.38 
  -1  13   3    7.04    0.38 
  -8  14   3    4.26    0.32 
  -7  14   3    4.64    0.33 
  -6  14   3    2.27    0.26 
  -5  14   3    8.05    0.43 
  -3  16  -4    1.24    0.17 
  -3  16  -4    1.04    0.19 
  -4  16  -4    3.90    0.34 
  -5  16  -4    0.64    0.16 
  -6  16  -4    1.04    0.18 
  -7  16  -4    0.43    0.15 
  -8  16  -4    2.48    0.30 
   0  15  -4    0.44    0.15 
   0  15  -4    0.24    0.15 
   0  15  -4    0.20    0.13 
  -1  15  -4   17.91    0.81 
  -1  15  -4   18.91    0.77 
  -2  15  -4   16.02    0.69 
  -2  15  -4   16.04    0.72 
  -3  15  -4    2.70    0.26 
  -3  15  -4    2.60    0.29 
  -4  15  -4    0.70    0.16 
  -5  15  -4    5.77    0.37 
  -6  15  -4    0.32    0.14 
  -7  15  -4   20.49    0.85 
  -8  15  -4    7.57    0.43 
  -9  15  -4    1.05    0.18 
 -10  15  -4    4.12    0.33 
   2  14  -4    6.08    0.41 
   2  14  -4    6.10    0.38 
   2  14  -4    6.28    0.45 
   1  14  -4    0.14    0.13 
   1  14  -4    0.10    0.12 
   1  14  -4    0.19    0.14 
   0  14  -4    0.16    0.13 
   0  14  -4    0.05    0.12 
   0  14  -4    0.01    0.11 
  -1  14  -4   10.32    0.53 
  -1  14  -4   11.08    0.54 
  -1  14  -4   11.00    0.50 
  -2  14  -4   17.65    0.73 
  -2  14  -4   18.76    0.77 
  -2  14  -4   17.17    0.75 
  -3  14  -4    0.35    0.11 
  -3  14  -4    0.28    0.13 
  -4  14  -4    9.78    0.48 
  -5  14  -4    6.56    0.37 
  -6  14  -4    2.69    0.26 
  -7  14  -4    5.04    0.32 
  -8  14  -4    0.25    0.12 
  -9  14  -4    1.96    0.24 
 -10  14  -4    1.96    0.25 
 -11  14  -4    4.19    0.32 
  11 -14   4    4.10    0.33 
 -12  14  -4   10.84    0.54 
  12 -14   4   11.50    0.58 
   4  13  -4    2.14    0.27 
   3  13  -4   28.00    1.14 
   3  13  -4   27.62    1.10 
   3  13  -4   29.93    1.18 
   2  13  -4    0.80    0.18 
   2  13  -4    0.92    0.15 
   2  13  -4    1.45    0.24 
   1  13  -4    1.40    0.21 
   1  13  -4    1.36    0.18 
   1  13  -4    1.43    0.25 
   0  13  -4    2.48    0.22 
   0  13  -4    2.42    0.26 
   0  13  -4    1.88    0.25 
  -1  13  -4    2.32    0.23 
  -1  13  -4    2.51    0.22 
  -1  13  -4    2.70    0.25 
  -1  13  -4    2.75    0.25 
  -2  13  -4    5.96    0.32 
  -2  13  -4    5.97    0.34 
  -2  13  -4    5.38    0.33 
  -3  13  -4   24.22    0.95 
  -3  13  -4   24.88    0.94 
  -3  13  -4   23.40    0.92 
  -4  13  -4   26.22    1.01 
  -5  13  -4    5.45    0.32 
  -6  13  -4    5.67    0.33 
  -7  13  -4    0.41    0.12 
  -8  13  -4    1.18    0.19 
   8 -13   4    1.20    0.19 
  -9  13  -4    4.86    0.31 
   9 -13   4    5.20    0.32 
 -10  13  -4    7.49    0.39 
  10 -13   4    7.19    0.41 
 -11  13  -4    1.63    0.23 
  11 -13   4    1.51    0.24 
 -12  13  -4    1.03    0.16 
  12 -13   4    0.63    0.18 
 -13  13  -4    0.30    0.13 
  13 -13   4    0.21    0.16 
   6  12  -4    0.63    0.15 
   5  12  -4    0.10    0.12 
   4  12  -4    4.64    0.32 
   4  12  -4    5.26    0.38 
   4  12  -4    4.92    0.35 
   3  12  -4    6.69    0.39 
   3  12  -4    6.36    0.42 
   3  12  -4    7.28    0.37 
   2  12  -4   21.98    0.87 
   2  12  -4   21.59    0.92 
   2  12  -4   22.69    0.90 
   1  12  -4    7.59    0.43 
   1  12  -4    7.98    0.42 
   1  12  -4    8.78    0.40 
   1  12  -4    7.58    0.40 
   0  12  -4    7.42    0.37 
   0  12  -4    6.53    0.39 
   0  12  -4    6.98    0.38 
   0  12  -4    7.48    0.36 
  -1  12  -4   19.88    0.77 
  -1  12  -4   19.24    0.80 
  -1  12  -4   20.26    0.80 
  -1  12  -4   19.84    0.79 
  -2  12  -4    3.62    0.25 
  -2  12  -4    2.90    0.22 
  -2  12  -4    3.44    0.25 
  -3  12  -4    7.43    0.36 
  -3  12  -4    7.55    0.35 
  -3  12  -4    7.39    0.37 
  -4  12  -4    7.53    0.36 
  -4  12  -4    6.62    0.33 
  -4  12  -4    6.71    0.35 
  -5  12  -4    8.33    0.40 
   5 -12   4    8.50    0.36 
  -6  12  -4    3.34    0.24 
   6 -12   4    3.37    0.21 
  -7  12  -4   15.76    0.65 
   7 -12   4   16.36    0.65 
  -8  12  -4    1.97    0.20 
   8 -12   4    2.07    0.20 
  -9  12  -4    0.42    0.11 
   9 -12   4    0.25    0.12 
 -10  12  -4    0.41    0.11 
  10 -12   4    0.33    0.14 
 -11  12  -4    0.12    0.10 
  11 -12   4    0.06    0.12 
 -12  12  -4    3.53    0.27 
  12 -12   4    3.49    0.32 
 -13  12  -4    5.64    0.35 
  13 -12   4    5.04    0.38 
   7  11  -4    0.09    0.13 
   6  11  -4    4.74    0.32 
   5  11  -4   21.28    0.83 
   5  11  -4   19.46    0.89 
   4  11  -4    0.40    0.12 
   4  11  -4    0.40    0.12 
   4  11  -4    0.31    0.15 
   3  11  -4    2.22    0.23 
   3  11  -4    1.88    0.21 
   3  11  -4    1.41    0.23 
   2  11  -4    0.03    0.09 
   2  11  -4   -0.03    0.09 
   2  11  -4    0.01    0.09 
   2  11  -4   -0.03    0.11 
   1  11  -4    0.36    0.11 
   1  11  -4    0.33    0.10 
   1  11  -4    0.16    0.11 
   1  11  -4    0.37    0.10 
   0  11  -4    0.26    0.09 
   0  11  -4    0.26    0.10 
   0  11  -4    0.13    0.11 
   0  11  -4    0.23    0.09 
  -1  11  -4    0.41    0.10 
  -1  11  -4    0.51    0.11 
  -1  11  -4    0.57    0.10 
  -2  11  -4   18.85    0.76 
  -2  11  -4   19.30    0.77 
  -2  11  -4   20.55    0.75 
  -3  11  -4    0.74    0.12 
  -3  11  -4    0.41    0.10 
  -3  11  -4    0.51    0.09 
   3 -11   4    0.45    0.07 
  -4  11  -4   13.47    0.54 
  -4  11  -4   14.15    0.56 
  -4  11  -4   14.07    0.54 
   4 -11   4   13.28    0.53 
  -5  11  -4   12.43    0.49 
  -5  11  -4   12.48    0.52 
   5 -11   4   12.73    0.50 
  -6  11  -4    4.80    0.26 
   6 -11   4    4.60    0.26 
  -7  11  -4    1.39    0.17 
   7 -11   4    1.72    0.17 
  -8  11  -4    0.02    0.08 
   8 -11   4   -0.03    0.09 
  -9  11  -4    0.58    0.11 
   9 -11   4    0.40    0.13 
 -10  11  -4   25.79    0.99 
  10 -11   4   26.31    1.04 
 -11  11  -4   24.26    0.94 
  11 -11   4   24.48    0.99 
 -12  11  -4    9.86    0.47 
  12 -11   4   10.35    0.53 
 -13  11  -4    2.63    0.26 
  13 -11   4    2.65    0.32 
 -14  11  -4   11.58    0.55 
   8  10  -4    4.51    0.33 
   7  10  -4   33.87    1.29 
   6  10  -4   18.28    0.78 
   6  10  -4   20.04    0.81 
   6  10  -4   19.14    0.85 
   5  10  -4    2.63    0.24 
   5  10  -4    3.92    0.31 
   5  10  -4    3.58    0.26 
   4  10  -4   16.45    0.66 
   4  10  -4   16.57    0.69 
   4  10  -4   15.41    0.71 
   3  10  -4    7.28    0.37 
   3  10  -4    7.11    0.37 
   3  10  -4    7.31    0.40 
   3  10  -4    7.13    0.36 
   2  10  -4    3.97    0.25 
   2  10  -4    3.94    0.29 
   2  10  -4    3.67    0.24 
   2  10  -4    3.83    0.26 
   1  10  -4   16.60    0.71 
   1  10  -4   17.28    0.74 
   1  10  -4   18.38    0.72 
   1  10  -4   19.81    0.70 
   0  10  -4   50.50    1.79 
   0  10  -4   49.57    1.80 
   0  10  -4   48.57    1.76 
  -1  10  -4   11.17    0.50 
  -1  10  -4   11.68    0.47 
  -1  10  -4   12.10    0.49 
  -2  10  -4   12.88    0.52 
  -2  10  -4   12.10    0.46 
  -2  10  -4   11.74    0.58 
  -2  10  -4   12.61    0.49 
  -2  10  -4   13.39    0.52 
   2 -10   4   12.51    0.46 
  -3  10  -4   14.55    0.58 
  -3  10  -4   14.45    0.57 
  -3  10  -4   15.66    0.59 
  -3  10  -4   14.79    0.59 
  -3  10  -4   15.32    0.56 
   3 -10   4   14.98    0.55 
   3 -10   4   14.52    0.59 
  -4  10  -4    3.73    0.20 
  -4  10  -4    3.84    0.21 
  -4  10  -4    3.56    0.21 
  -4  10  -4    3.86    0.20 
  -4  10  -4    3.56    0.19 
   4 -10   4    4.11    0.21 
   4 -10   4    3.71    0.20 
  -5  10  -4   45.08    1.68 
  -5  10  -4   49.28    1.73 
  -5  10  -4   48.97    1.71 
  -5  10  -4   48.24    1.71 
  -5  10  -4   48.42    1.69 
   5 -10   4   48.57    1.71 
   5 -10   4   47.48    1.71 
  -6  10  -4    9.05    0.39 
   6 -10   4    9.20    0.40 
   6 -10   4    8.93    0.41 
  -7  10  -4    0.87    0.14 
   7 -10   4    1.02    0.16 
  -8  10  -4    6.50    0.31 
   8 -10   4    6.04    0.34 
  -9  10  -4    0.79    0.11 
   9 -10   4    0.88    0.15 
 -10  10  -4    8.41    0.39 
  10 -10   4    8.30    0.43 
 -11  10  -4    0.70    0.12 
  11 -10   4    1.09    0.18 
 -12  10  -4    0.54    0.12 
  12 -10   4    0.82    0.17 
 -13  10  -4    3.41    0.26 
  13 -10   4    2.77    0.31 
 -14  10  -4   15.22    0.66 
   9   9  -4    0.30    0.13 
   8   9  -4    0.44    0.13 
   7   9  -4    2.24    0.28 
   7   9  -4    2.46    0.26 
   7   9  -4    2.49    0.25 
   6   9  -4   27.98    1.25 
   6   9  -4   34.91    1.32 
   6   9  -4   37.14    1.26 
   5   9  -4    2.45    0.24 
   5   9  -4    3.09    0.29 
   5   9  -4    2.62    0.23 
   4   9  -4   10.51    0.47 
   4   9  -4    9.83    0.50 
   4   9  -4   10.66    0.47 
   4   9  -4    9.82    0.45 
   3   9  -4    5.66    0.30 
   3   9  -4    6.50    0.33 
   3   9  -4    6.27    0.32 
   3   9  -4    5.67    0.35 
   2   9  -4    2.17    0.19 
   2   9  -4    2.32    0.19 
   2   9  -4    2.14    0.18 
   1   9  -4    8.09    0.37 
   1   9  -4    7.93    0.43 
   1   9  -4    8.79    0.37 
   1   9  -4    7.71    0.35 
   1   9  -4    7.96    0.36 
  -1  -9   4    8.12    0.38 
   0   9  -4    8.47    0.37 
   0   9  -4    8.33    0.36 
   0   9  -4    8.57    0.35 
   0   9  -4    7.91    0.36 
   0  -9   4    8.23    0.34 
  -1   9  -4    0.35    0.06 
  -1   9  -4    0.44    0.08 
  -1   9  -4    0.23    0.08 
  -1   9  -4    0.38    0.07 
   1  -9   4    0.24    0.05 
  -2   9  -4   75.62    2.63 
  -2   9  -4   73.97    2.62 
  -2   9  -4   76.39    2.63 
  -2   9  -4   74.86    2.63 
  -2   9  -4   71.49    2.60 
   2  -9   4   77.47    2.60 
   2  -9   4   75.45    2.64 
  -3   9  -4   38.13    1.39 
  -3   9  -4   38.94    1.39 
  -3   9  -4   36.94    1.38 
  -3   9  -4   39.88    1.39 
  -3   9  -4   38.83    1.37 
   3  -9   4   40.48    1.38 
   3  -9   4   39.15    1.39 
  -4   9  -4   50.29    1.76 
  -4   9  -4   49.23    1.77 
  -4   9  -4   47.78    1.74 
  -4   9  -4   50.13    1.76 
   4  -9   4   48.56    1.76 
   4  -9   4   52.22    1.76 
  -5   9  -4   11.72    0.44 
  -5   9  -4   12.22    0.47 
  -5   9  -4   11.93    0.44 
  -5   9  -4   11.38    0.46 
   5  -9   4   11.92    0.48 
   5  -9   4   11.74    0.47 
  -6   9  -4  116.06    3.92 
  -6   9  -4  112.63    3.92 
   6  -9   4  108.61    3.92 
   6  -9   4  113.67    3.94 
  -7   9  -4   86.52    2.91 
  -7   9  -4   80.64    2.90 
   7  -9   4   80.38    2.90 
   7  -9   4   84.42    2.94 
  -8   9  -4    4.64    0.24 
   8  -9   4    4.44    0.28 
  -9   9  -4    8.26    0.37 
   9  -9   4    8.66    0.42 
 -10   9  -4    0.54    0.10 
  10  -9   4    0.68    0.15 
 -11   9  -4   11.02    0.48 
  11  -9   4   11.23    0.54 
 -12   9  -4   37.76    1.37 
  12  -9   4   35.70    1.42 
 -13   9  -4   12.42    0.55 
  13  -9   4   12.03    0.61 
 -14   9  -4    0.04    0.11 
  10   8  -4    4.68    0.32 
   9   8  -4    9.52    0.47 
   8   8  -4    0.28    0.12 
   8   8  -4    0.20    0.14 
   7   8  -4    5.94    0.33 
   7   8  -4    5.75    0.35 
   7   8  -4    5.73    0.40 
   6   8  -4   59.95    2.01 
   6   8  -4   51.25    2.06 
   5   8  -4   27.66    1.07 
   5   8  -4   29.09    1.09 
   5   8  -4   28.17    1.10 
   5   8  -4   30.34    1.14 
   4   8  -4    3.32    0.23 
   4   8  -4    3.03    0.23 
   4   8  -4    3.12    0.22 
   4   8  -4    3.24    0.21 
   3   8  -4   22.28    0.88 
   3   8  -4   23.64    0.88 
   3   8  -4   24.03    0.86 
   3   8  -4   21.61    0.87 
  -3  -8   4   23.25    0.86 
   2   8  -4    8.04    0.35 
   2   8  -4    7.76    0.34 
   2   8  -4    8.13    0.36 
   2   8  -4    7.66    0.35 
   2   8  -4    7.98    0.36 
  -2  -8   4    7.87    0.33 
   1   8  -4   42.05    1.51 
   1   8  -4   44.74    1.51 
   1   8  -4   42.89    1.50 
   1   8  -4   42.68    1.51 
   1   8  -4   37.38    1.48 
  -1  -8   4   41.67    1.48 
   0   8  -4   69.20    2.40 
   0   8  -4   71.36    2.41 
   0   8  -4   68.97    2.40 
   0   8  -4   62.13    2.38 
   0  -8   4   70.05    2.38 
  -1   8  -4   75.35    2.69 
  -1   8  -4   77.20    2.67 
  -1   8  -4   76.20    2.68 
  -1   8  -4   78.07    2.68 
   1  -8   4   76.83    2.66 
  -2   8  -4   12.40    0.47 
  -2   8  -4   12.68    0.46 
  -2   8  -4   11.71    0.45 
  -2   8  -4   12.34    0.47 
  -2   8  -4   12.40    0.47 
   2  -8   4   12.72    0.45 
   2  -8   4   12.00    0.48 
  -3   8  -4    6.59    0.29 
  -3   8  -4    6.29    0.26 
  -3   8  -4    6.59    0.28 
  -3   8  -4    7.55    0.29 
  -3   8  -4    6.67    0.28 
   3  -8   4    6.60    0.28 
   3  -8   4    6.36    0.28 
  -4   8  -4   17.15    0.63 
  -4   8  -4   17.88    0.66 
  -4   8  -4   17.45    0.64 
  -4   8  -4   16.62    0.64 
  -4   8  -4   17.10    0.62 
   4  -8   4   17.50    0.65 
   4  -8   4   17.13    0.64 
  -5   8  -4   62.22    2.12 
  -5   8  -4   59.27    2.10 
  -5   8  -4   59.28    2.10 
  -5   8  -4   60.04    2.12 
   5  -8   4   60.31    2.12 
   5  -8   4   62.24    2.14 
  -6   8  -4    5.28    0.23 
  -6   8  -4    5.18    0.21 
  -6   8  -4    5.14    0.23 
   6  -8   4    4.81    0.23 
   6  -8   4    5.19    0.27 
  -7   8  -4    9.93    0.41 
  -7   8  -4    9.81    0.40 
   7  -8   4   10.24    0.41 
   7  -8   4   10.34    0.45 
  -8   8  -4   30.97    1.14 
  -8   8  -4   31.61    1.14 
   8  -8   4   30.27    1.13 
   8  -8   4   32.32    1.18 
  -9   8  -4    0.50    0.09 
   9  -8   4    0.50    0.13 
 -10   8  -4   23.15    0.89 
  10  -8   4   24.09    0.94 
 -11   8  -4    4.87    0.27 
  11  -8   4    4.37    0.33 
 -12   8  -4    3.17    0.24 
  12  -8   4    3.41    0.30 
 -13   8  -4    1.21    0.15 
  13  -8   4    0.97    0.19 
 -14   8  -4    5.14    0.32 
  14  -8   4    4.35    0.53 
  11   7  -4    0.01    0.12 
  10   7  -4    0.55    0.14 
   9   7  -4    8.46    0.51 
   9   7  -4    9.67    0.44 
   8   7  -4    8.30    0.40 
   8   7  -4    8.36    0.47 
   8   7  -4    7.93    0.42 
   7   7  -4   32.97    1.20 
   7   7  -4   31.81    1.22 
   7   7  -4   31.77    1.27 
   6   7  -4   23.39    0.91 
   6   7  -4   23.27    0.89 
   6   7  -4   23.22    0.84 
   6   7  -4   23.45    0.95 
   5   7  -4   10.63    0.48 
   5   7  -4   12.01    0.46 
   5   7  -4   11.19    0.41 
   5   7  -4   11.25    0.48 
   5   7  -4   10.74    0.48 
  -5  -7   4   10.03    0.46 
   4   7  -4   24.82    0.94 
   4   7  -4   25.39    0.95 
   4   7  -4   25.43    0.93 
   4   7  -4   23.16    0.94 
  -4  -7   4   24.26    0.88 
  -4  -7   4   26.58    0.93 
  -4  -7   4   26.20    0.89 
   3   7  -4    3.59    0.22 
   3   7  -4    3.89    0.21 
   3   7  -4    3.71    0.20 
   3   7  -4    3.56    0.21 
   3   7  -4    4.08    0.21 
  -3  -7   4    3.64    0.19 
   2   7  -4   38.97    1.45 
   2   7  -4   41.56    1.47 
   2   7  -4   41.05    1.46 
   2   7  -4   42.66    1.47 
   2   7  -4   37.25    1.47 
  -2  -7   4   44.27    1.46 
   1   7  -4   26.29    1.00 
   1   7  -4   27.15    0.99 
   1   7  -4   27.22    1.00 
   1   7  -4   28.20    1.00 
  -1  -7   4   29.10    0.99 
   0   7  -4    0.03    0.04 
   0   7  -4    0.05    0.04 
   0   7  -4    0.04    0.05 
   0   7  -4    0.03    0.05 
   0  -7   4    0.06    0.03 
  -1   7  -4    3.39    0.14 
  -1   7  -4    3.07    0.16 
  -1   7  -4    3.29    0.16 
  -1   7  -4    3.17    0.16 
  -1   7  -4    3.52    0.15 
   1  -7   4    3.17    0.13 
   1  -7   4    3.32    0.17 
   1  -7   4    3.30    0.13 
  -2   7  -4    0.60    0.08 
  -2   7  -4    0.71    0.08 
  -2   7  -4    0.76    0.08 
  -2   7  -4    0.86    0.08 
  -2   7  -4    0.83    0.06 
   2  -7   4    0.66    0.08 
   2  -7   4    0.85    0.07 
  -3   7  -4    0.33    0.05 
  -3   7  -4    0.50    0.08 
  -3   7  -4    0.28    0.05 
   3  -7   4    0.27    0.06 
   3  -7   4    0.29    0.05 
  -4   7  -4  115.57    3.90 
  -4   7  -4  113.79    3.90 
  -4   7  -4  105.33    3.93 
  -4   7  -4  112.66    3.90 
   4  -7   4  114.01    3.91 
   4  -7   4  115.64    3.92 
  -5   7  -4    6.71    0.27 
  -5   7  -4    6.75    0.26 
  -5   7  -4    6.60    0.27 
   5  -7   4    6.99    0.31 
   5  -7   4    6.59    0.27 
  -6   7  -4    0.12    0.04 
  -6   7  -4    0.10    0.04 
  -6   7  -4    0.13    0.05 
   6  -7   4    0.18    0.05 
   6  -7   4    0.11    0.08 
  -7   7  -4    2.66    0.16 
  -7   7  -4    2.68    0.13 
  -7   7  -4    2.61    0.15 
  -7   7  -4    2.56    0.12 
   7  -7   4    2.77    0.20 
   7  -7   4    2.63    0.16 
  -8   7  -4    8.68    0.36 
  -8   7  -4    8.69    0.37 
   8  -7   4    9.19    0.42 
   8  -7   4    8.91    0.37 
  -9   7  -4   12.70    0.51 
   9  -7   4   13.00    0.56 
   9  -7   4   12.52    0.47 
 -10   7  -4   45.66    1.65 
  10  -7   4   46.05    1.70 
 -11   7  -4    2.66    0.20 
  11  -7   4    2.62    0.26 
 -12   7  -4    4.40    0.27 
  12  -7   4    4.52    0.34 
 -13   7  -4    8.28    0.42 
  13  -7   4    8.94    0.50 
 -14   7  -4   13.16    0.60 
  14  -7   4   14.41    0.87 
  12   6  -4    0.51    0.14 
  11   6  -4    1.77    0.23 
  10   6  -4    3.39    0.26 
  10   6  -4    3.13    0.31 
   9   6  -4   18.33    0.86 
   9   6  -4   17.94    0.71 
   9   6  -4   16.60    0.78 
   8   6  -4   54.90    1.98 
   8   6  -4   52.47    1.93 
   8   6  -4   53.01    1.91 
   8   6  -4   51.87    1.89 
   7   6  -4   45.00    1.65 
   7   6  -4   45.59    1.60 
   7   6  -4   43.43    1.62 
   7   6  -4   45.48    1.64 
   6   6  -4    3.49    0.23 
   6   6  -4    2.49    0.20 
   6   6  -4    3.53    0.22 
   6   6  -4    3.70    0.18 
  -6  -6   4    3.63    0.21 
   5   6  -4   33.68    1.20 
   5   6  -4   31.84    1.17 
   5   6  -4   31.88    1.14 
   5   6  -4   32.42    1.19 
  -5  -6   4   33.39    1.18 
  -5  -6   4   30.99    1.16 
   4   6  -4    2.86    0.17 
   4   6  -4    2.63    0.18 
   4   6  -4    2.68    0.12 
   4   6  -4    2.80    0.18 
   4   6  -4    2.82    0.19 
  -4  -6   4    2.52    0.13 
  -4  -6   4    2.53    0.16 
   3   6  -4    0.19    0.05 
   3   6  -4    0.22    0.06 
   3   6  -4    0.17    0.06 
   3   6  -4    0.16    0.06 
   3   6  -4    0.21    0.06 
  -3  -6   4    0.29    0.06 
   2   6  -4   18.56    0.70 
   2   6  -4   19.89    0.72 
   2   6  -4   19.45    0.71 
   2   6  -4   19.06    0.72 
   2   6  -4   18.95    0.72 
  -2  -6   4   19.76    0.70 
   1   6  -4    4.19    0.20 
   1   6  -4    4.33    0.19 
   1   6  -4    4.52    0.20 
   1   6  -4    4.38    0.21 
  -1  -6   4    4.62    0.19 
   0   6  -4   46.53    1.77 
   0   6  -4   52.83    1.77 
   0   6  -4   50.73    1.77 
   0  -6   4   51.98    1.75 
  -1   6  -4   12.33    0.45 
  -1   6  -4   11.99    0.44 
  -1   6  -4   12.21    0.45 
  -1   6  -4   11.69    0.45 
   1  -6   4   12.01    0.44 
   1  -6   4   12.12    0.45 
  -2   6  -4  107.80    3.72 
  -2   6  -4  109.16    3.70 
  -2   6  -4  105.60    3.70 
   2  -6   4  107.56    3.71 
   2  -6   4  106.36    3.71 
  -3   6  -4   86.47    3.03 
  -3   6  -4   84.10    3.04 
  -3   6  -4   90.11    3.02 
  -3   6  -4   88.27    3.02 
   3  -6   4   88.41    3.04 
   3  -6   4   86.52    3.02 
  -4   6  -4   27.80    0.98 
  -4   6  -4   26.11    0.95 
  -4   6  -4   26.07    0.94 
  -4   6  -4   26.63    0.94 
   4  -6   4   26.55    0.94 
   4  -6   4   26.80    0.97 
  -5   6  -4    0.21    0.04 
  -5   6  -4    0.26    0.04 
  -5   6  -4    0.22    0.04 
   5  -6   4    0.27    0.07 
   5  -6   4    0.15    0.04 
  -6   6  -4   29.34    1.06 
  -6   6  -4   30.88    1.06 
  -6   6  -4   29.08    1.06 
   6  -6   4   29.55    1.10 
   6  -6   4   30.18    1.06 
   6  -6   4   30.32    1.07 
  -7   6  -4    4.43    0.20 
  -7   6  -4    4.30    0.20 
  -7   6  -4    4.46    0.20 
   7  -6   4    4.21    0.20 
   7  -6   4    4.41    0.25 
   7  -6   4    4.48    0.20 
  -8   6  -4    7.88    0.34 
  -8   6  -4    8.40    0.34 
   8  -6   4    8.39    0.33 
   8  -6   4    7.96    0.34 
   8  -6   4    8.24    0.40 
  -9   6  -4    0.31    0.07 
  -9   6  -4    0.31    0.08 
   9  -6   4    0.32    0.07 
   9  -6   4    0.43    0.13 
 -10   6  -4    3.32    0.21 
  10  -6   4    3.30    0.27 
  10  -6   4    3.55    0.21 
 -11   6  -4   14.61    0.59 
  11  -6   4   14.42    0.65 
 -12   6  -4   10.57    0.49 
  12  -6   4   11.76    0.56 
 -13   6  -4    1.66    0.20 
  13  -6   4    1.94    0.27 
 -14   6  -4    2.31    0.24 
  12   5  -4    0.00    0.11 
  11   5  -4    0.82    0.13 
  11   5  -4    0.59    0.17 
  10   5  -4   12.55    0.54 
  10   5  -4   12.28    0.61 
  10   5  -4   12.61    0.54 
   9   5  -4    0.22    0.13 
   9   5  -4    0.10    0.10 
   9   5  -4    0.19    0.09 
   9   5  -4    0.05    0.09 
   8   5  -4   11.80    0.51 
   8   5  -4   11.61    0.51 
   8   5  -4   11.71    0.49 
   8   5  -4   11.61    0.48 
  -8  -5   4   11.56    0.52 
   7   5  -4    0.10    0.08 
   7   5  -4   -0.05    0.07 
   7   5  -4   -0.04    0.07 
   7   5  -4    0.00    0.07 
  -7  -5   4    0.01    0.06 
  -7  -5   4   -0.02    0.06 
   6   5  -4    1.99    0.16 
   6   5  -4    1.91    0.13 
   6   5  -4    1.31    0.16 
   6   5  -4    1.83    0.17 
  -6  -5   4    2.23    0.16 
  -6  -5   4    1.77    0.14 
  -6  -5   4    1.75    0.14 
   5   5  -4    7.25    0.32 
   5   5  -4    7.77    0.30 
   5   5  -4    7.06    0.33 
   5   5  -4    7.50    0.34 
  -5  -5   4    8.05    0.33 
  -5  -5   4    7.12    0.31 
   4   5  -4    9.19    0.37 
   4   5  -4    9.08    0.36 
   4   5  -4    8.93    0.37 
   4   5  -4    8.51    0.33 
   4   5  -4    8.34    0.37 
  -4  -5   4    8.51    0.36 
  -4  -5   4    9.17    0.34 
   3   5  -4   89.74    3.08 
   3   5  -4   90.72    3.08 
   3   5  -4   90.33    3.08 
   3   5  -4   89.69    3.06 
   3   5  -4   86.58    3.04 
  -3  -5   4   90.19    3.07 
  -3  -5   4   80.73    3.05 
   2   5  -4    4.59    0.21 
   2   5  -4    4.62    0.20 
   2   5  -4    4.18    0.20 
  -2  -5   4    4.38    0.19 
   1   5  -4   13.65    0.48 
   1   5  -4   12.71    0.47 
   1   5  -4   13.30    0.48 
  -1  -5   4   11.85    0.46 
   0   5  -4   10.12    0.36 
   0   5  -4    9.77    0.37 
   0   5  -4    9.80    0.37 
   0   5  -4   10.51    0.37 
   0   5  -4    9.63    0.36 
  -1   5  -4    1.42    0.08 
  -1   5  -4    1.40    0.08 
  -1   5  -4    1.32    0.07 
  -1   5  -4    1.36    0.12 
   1  -5   4    1.39    0.09 
  -2   5  -4   16.21    0.58 
  -2   5  -4   16.42    0.58 
  -2   5  -4   16.43    0.61 
   2  -5   4   16.52    0.60 
   2  -5   4   16.81    0.59 
  -3   5  -4   41.00    1.44 
  -3   5  -4   40.69    1.42 
  -3   5  -4   39.23    1.39 
  -3   5  -4   39.97    1.39 
   3  -5   4   40.44    1.40 
   3  -5   4   40.38    1.43 
  -4   5  -4    0.88    0.06 
  -4   5  -4    0.73    0.08 
  -4   5  -4    0.77    0.06 
  -4   5  -4    0.85    0.10 
   4  -5   4    0.80    0.11 
   4  -5   4    0.56    0.08 
   4  -5   4    0.80    0.07 
  -5   5  -4  195.80    7.01 
  -5   5  -4  204.73    7.02 
  -5   5  -4  203.55    7.03 
   5  -5   4  211.52    7.06 
   5  -5   4  207.28    7.03 
   5  -5   4  200.59    7.02 
  -6   5  -4   63.57    2.29 
  -6   5  -4   65.69    2.29 
  -6   5  -4   67.80    2.30 
   6  -5   4   66.34    2.33 
   6  -5   4   65.18    2.29 
   6  -5   4   65.83    2.29 
  -7   5  -4    0.18    0.05 
  -7   5  -4    0.13    0.05 
  -7   5  -4    0.17    0.03 
  -7   5  -4    0.16    0.05 
   7  -5   4    0.22    0.06 
   7  -5   4    0.10    0.05 
   7  -5   4    0.24    0.09 
  -8   5  -4   41.31    1.44 
  -8   5  -4   41.15    1.45 
  -8   5  -4   41.28    1.45 
  -8   5  -4   39.03    1.45 
   8  -5   4   41.19    1.45 
   8  -5   4   39.92    1.49 
   8  -5   4   40.35    1.45 
  -9   5  -4    0.53    0.08 
  -9   5  -4    0.68    0.13 
   9  -5   4    0.72    0.12 
   9  -5   4    0.66    0.14 
 -10   5  -4    7.90    0.36 
  10  -5   4    7.68    0.35 
  10  -5   4    7.38    0.41 
 -11   5  -4    5.98    0.31 
  11  -5   4    6.17    0.37 
 -12   5  -4   19.67    0.78 
  12  -5   4   19.57    0.84 
 -13   5  -4    8.52    0.42 
  13  -5   4    8.35    0.48 
 -14   5  -4   13.19    0.59 
  13   4  -4   12.52    0.55 
  12   4  -4    2.80    0.31 
  12   4  -4    2.75    0.24 
  11   4  -4   -0.02    0.10 
  11   4  -4    0.06    0.13 
  11   4  -4    0.10    0.11 
  10   4  -4    1.85    0.19 
  10   4  -4    1.55    0.24 
  10   4  -4    1.77    0.19 
   9   4  -4    0.29    0.10 
   9   4  -4    0.40    0.11 
   9   4  -4    0.51    0.11 
  -9  -4   4    0.43    0.09 
   8   4  -4   16.64    0.69 
   8   4  -4   17.93    0.68 
   8   4  -4   17.53    0.70 
   8   4  -4   17.56    0.68 
  -8  -4   4   17.16    0.68 
  -8  -4   4   18.04    0.69 
   7   4  -4   19.52    0.75 
   7   4  -4   18.85    0.74 
   7   4  -4   19.16    0.73 
   7   4  -4   19.04    0.72 
  -7  -4   4   19.59    0.74 
  -7  -4   4   18.51    0.73 
   6   4  -4   87.20    3.04 
   6   4  -4   88.78    3.06 
   6   4  -4   77.92    3.05 
   6   4  -4   88.15    3.03 
  -6  -4   4   92.11    3.05 
  -6  -4   4   90.19    3.04 
  -6  -4   4   84.06    3.04 
   5   4  -4   25.61    0.92 
   5   4  -4   25.66    0.92 
   5   4  -4   24.41    0.90 
   5   4  -4   24.45    0.91 
   5   4  -4   24.59    0.92 
  -5  -4   4   24.54    0.91 
  -5  -4   4   25.27    0.91 
  -5  -4   4   25.62    0.91 
   4   4  -4   23.06    0.86 
   4   4  -4   24.51    0.86 
   4   4  -4   25.62    0.85 
   4   4  -4   22.39    0.84 
   4   4  -4   23.62    0.86 
  -4  -4   4   22.83    0.84 
  -4  -4   4   21.87    0.85 
   3   4  -4    0.35    0.06 
   3   4  -4    0.30    0.05 
   3   4  -4    0.27    0.05 
   3   4  -4    0.32    0.05 
  -3  -4   4    0.37    0.05 
  -3  -4   4    0.31    0.05 
   2   4  -4   36.69    1.39
[truncated: 4,252,070 more chars]
